# Supplementary material for: A green and facile photochemical thiolate-catalyzed strategy for borylation of aryl fluorides with NHC–borane
Source: Royal Society of Chemistry journal article supplement (doi:10.1039/d4qo00058g), 2024-01-01
Supplement: d4qo00058g1.pdf [file d4qo00058g1.pdf]

# A green and facile photochemical thiolate-catalyze strategy for the borylation of aryl fluorides with NHC-borane

Yu-Qi Miao<sup>a,b</sup>, Qiao-Jing Pan<sup>b</sup>, Jia-Xin Kang<sup>b</sup>, Xusheng Dai<sup>b</sup>, Zhenxing Liu<sup>\*c</sup>,

Xuenian Chen<sup>\*b,c</sup>

## Affiliations:

<sup>a</sup>School of Pharmacy, Xinxiang University, Xinxiang, Henan, 453003, China

<sup>b</sup>Henan Key Laboratory of Boron Chemistry and Advanced Energy Materials, School of Chemistry and Chemical Engineering, Henan Normal University, Xinxiang, Henan, China.

<sup>c</sup>College of Chemistry, Zhengzhou University, Zhengzhou, Henan, China.

\*Corresponding Author: [Xuenian\\_Chen@zzu.edu.cn](mailto:Xuenian_Chen@zzu.edu.cn) (X. C), [Liuzhenxing@zzu.edu.cn](mailto:Liuzhenxing@zzu.edu.cn) (Z. L.)

## Table of Contents

|     |                                                                                    |    |
|-----|------------------------------------------------------------------------------------|----|
| 1.  | General information.....                                                           | 2  |
| 2.  | Synthesis of Starting Materials.....                                               | 2  |
| 3.  | General Experimental Procedure for the defluoroborylation of polyfluoroarenes..... | 3  |
| 4.  | Mechanistic Experiments.....                                                       | 4  |
| 5.  | EPR spectrum experiment.....                                                       | 4  |
| 6.  | General Experimental Procedure for the formation of boryl sulfides.....            | 6  |
| 7.  | Characterization data of products.....                                             | 6  |
| 8.  | Characterization data of starting materials and boryl sulfides.....                | 19 |
| 9.  | The crystallographic data.....                                                     | 25 |
| 10. | References.....                                                                    | 27 |
| 10. | NMR Spectra.....                                                                   | 28 |



## 1. General information

All reagents purchased commercially were used without further purification unless otherwise noted. The Blue LEDs were purchased from the supermarket. Thin-layer chromatography (TLC) analysis was performed by illumination with a UV lamp (254 nm), and flash column chromatography was carried out with 200–300 mesh silica gel.  $^1\text{H}$  NMR,  $^{13}\text{C}$  NMR,  $^{11}\text{B}$  NMR and  $^{19}\text{F}$  NMR spectra were recorded on 600 MHz spectrometer in  $\text{CDCl}_3$  at room temperature. Chemical shifts ( $\delta$ ) are reported in ppm relative to the solvent peak. The  $^{11}\text{B}$  and  $^{11}\text{B}\{^1\text{H}\}$  NMR spectra were obtained at 128 or 193 MHz. All  $^{11}\text{B}$  chemical shifts are referenced to  $\text{BF}_3\cdot\text{OEt}_2$  (0.0 ppm), with a negative sign indicating an upfield shift. Multiplicity was indicated as follows: s (singlet), d (doublet), t (triplet), q (quartet), m (multiplet), dd (doublet of doublet), with coupling constants ( $J$ ) in hertz (Hz).

## 2. Synthesis of Starting Materials

### 2.1 Procedure for preparation of NHC-BH<sub>3</sub><sup>1</sup>

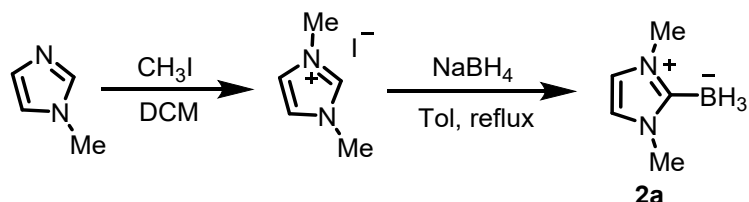

A 100 mL Schlenk-tube was charged with 1-methylimidazole (8.2 g, 100 mmol, 1.0 equiv.) in  $\text{CH}_2\text{Cl}_2$  (20 mL) to which methyl iodide (16.9 g, 120 mmol, 1.2 equiv.) was added dropwise over 10 min at 0 °C. The mixture was allowed to stir for 2 h at room temperature. The crude product was then obtained after removing the solvent, and directly used for next step without further purification. Then the mixture was added 50 mL toluene and  $\text{NaBH}_4$  (4.53 g, 120 mmol, 1.2 equiv.), and the mixture was placed in an oil bath and reacted at 120 °C for 24 h. The hot reaction solvent was cautiously decanted from the insoluble mixture, and the remaining residue was extracted with hot toluene ( $2 \times 20$  mL). The organic extracts were combined, evaporated, and further recrystallized over water to give the 5.3 g pure product as a fine white crystal in a 48% yield.

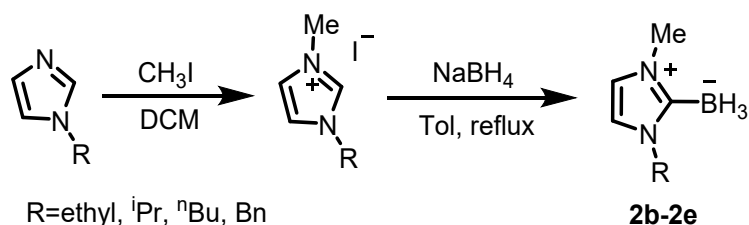

A 100 mL Schlenk-tube was charged with imidazole (10 mmol, 1.0 equiv.) in  $\text{CH}_2\text{Cl}_2$  (20 mL) to which methyl iodide (1.7 g, 12 mmol, 1.2 equiv.) was added dropwise over 5 min at 0 °C. The mixture was allowed to stir for 2 h at room temperature. The crude product was then obtained after removing the solvent, and directly used for next step without further purification. Then the mixture was added 30 mL toluene and  $\text{NaBH}_4$

(453 mg, 12 mmol, 1.2 equiv.), and the mixture was placed in an oil bath and reacted at 120 °C for 24 h. The hot reaction solvent was cautiously decanted from the insoluble mixture, and the remaining residue was extracted with hot toluene (2 × 20 mL). The organic extracts were combined, evaporated, purified by column chromatography (Petroleum ether: EtOAc) on silica gel to obtain the final products.

## 2.2 Preparation of TRIP thiol<sup>2</sup>

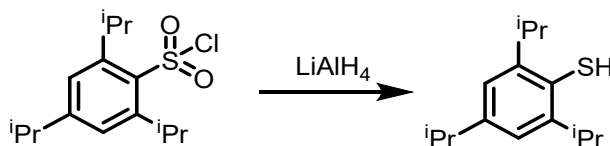

A 100 mL Schlenk-tube was charged with lithium aluminum hydride (LiAlH<sub>4</sub>) (1.52 g, 40.0 mmol, 2.0 equiv.). Dry Et<sub>2</sub>O (20 mL) was then added and cooled to 0 °C. To a mixture of 2,4,6-triisopropylbenzene-1-sulfonyl chloride (5.96 g, 20 mmol, 1.0 equiv.) in Et<sub>2</sub>O (20 mL) was added slowly. After completion of the addition, an additional load of LiAlH<sub>4</sub> (0.76 g, 20 mmol, 1.0 equiv.) was added. The reaction was allowed to warm to rt and it was stirred overnight. Upon completion, the reaction was cooled to 0 °C and diluted with 40 mL Et<sub>2</sub>O. The reaction was quenched with water (4 mL), 4 mL 15% (w/w) NaOH solution, and 10 mL water. The reaction was stirred for 30 min at 0 °C before MgSO<sub>4</sub> was added. The resulting white slurry was allowed to stir for 30 minutes at room temperature. The white solids were removed via filtration, with Et<sub>2</sub>O washing. The filtrate was then concentrated and distilled at reduced pressure to provide 3.8 g of 2,4,6-triisopropyl-benzenethiol as colorless oil in 80% yield.

## 3. General Experimental Procedure for the defluoroborylation of polyfluoroarenes.

### 3.1 General Experimental Procedure for the defluoroborylation of polyfluoroarenes with NHC-borane 2a.

A 10 mL Schlenk-tube was charged with polyfluoroarene (0.2 mmol, 1.0 equiv.), NHC-borane **2a** (44 mg, 0.4 mmol, 2 equiv.), 2,4,6-triisopropyl-thiophenol (14 mg, 0.06 mmol, 0.3 equiv.) and pyridine (48 mg, 0.6 mmol, 3 equiv.) in dry THF (4 mL) with magnetic stirring under N<sub>2</sub> atmosphere. The tube was placed at a distance (app. 5 cm) from 10W blue LEDs (390-400 nm) lamp and the mixture was stirred for 24 h at 35-38 °C. Then the reaction was added 5 mL 1M HCl, extracted with DCM (3 × 10 mL), dried over anhydrous Na<sub>2</sub>SO<sub>4</sub>, and evaporated under reduced pressure. The residue was purified by column chromatography (Petroleum ether: EtOAc) on silica gel to obtain the products.

### 3.2 General Experimental Procedure for the defluoroborylation of pentafluoroanisole with NHC-borane 2b-2e.

A 10 mL Schlenk-tube was charged with pentafluoroanisole (40 mg, 0.2 mmol, 1.0 equiv.), NHC-borane (0.4 mmol, 2 equiv.), 2,4,6-triisopropyl-thiophenol (14 mg, 0.06 mmol, 0.3 equiv.) and NaNH<sub>2</sub> (24 mg, 0.6 mmol, 3 equiv.) in dry THF (4 mL) with magnetic stirring under N<sub>2</sub> atmosphere. The tube was placed at a distance (app. 5 cm) from 10W blue LEDs (390-400 nm) lamp and the mixture was stirred for 24 h at 35-38

°C. Then the reaction was added 5 mL 1M HCl, extracted with DCM (3 × 10 mL), dried over anhydrous Na<sub>2</sub>SO<sub>4</sub>, and evaporated under reduced pressure. The residue was purified by column chromatography (Petroleum ether: EtOAc) on silica gel to obtain the products.

### 3.3 1 mmol scale reaction.

A 50 mL Schlenk-tube was charged with methyl 3,4,5-trifluorobenzoate (190 mg, 1 mmol, 1.0 equiv.), NHC-borane **2a** (220 mg, 2 mmol, 2 equiv.), 2,4,6-triisopropylthiophenol (70 mg, 0.3 mmol, 0.3 equiv.) and pyridine (480 mg, 6 mmol, 3 equiv.) in dry THF (20 mL) with magnetic stirring under N<sub>2</sub> atmosphere. The tube was placed at a distance (app. 5 cm) from 10W blue LEDs (390-400 nm) lamp and the mixture was stirred for 24 h at 35-38 °C. Then the reaction was added 10 mL 1M HCl, extracted with DCM (3 × 20 mL), dried over anhydrous Na<sub>2</sub>SO<sub>4</sub>, and evaporated under reduced pressure. The residue was purified by column chromatography (Petroleum ether: EtOAc) on silica gel to obtain the **3s** in 75% isolated yield.

## 4. Mechanistic Experiments.

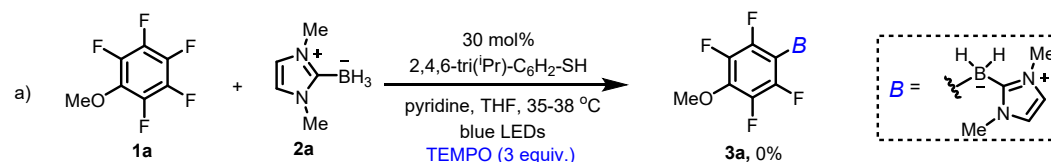

A 10 mL Schlenk-tube was charged with 2,3,4,5,6-pentafluoroanisole (20 mg, 0.1 mmol, 1.0 equiv.), NHC-borane **2a** (22 mg, 0.2 mmol, 2 equiv.), 2,4,6-triisopropylthiophenol (7 mg, 0.03 mmol, 0.3 equiv.), pyridine (24 mg, 0.3 mmol, 3 equiv.) and TEMPO (47 mg, 0.3 mmol, 3.0 equiv.) in dry THF (2 mL) with magnetic stirring under N<sub>2</sub> atmosphere. The tube was placed at a distance (app. 5 cm) from 10W blue LEDs (390-400 nm) lamp and the mixture was stirred for 24 h at 35-38 °C. The desired product **3a** were not formed by TLC detected. And we found the boryl radical-trapping and thiyl radical-trapping products by HRMS.

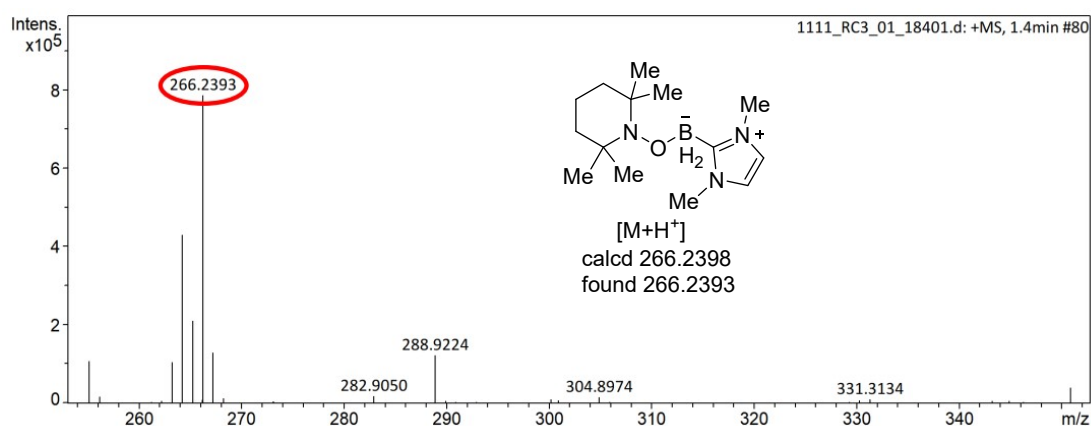

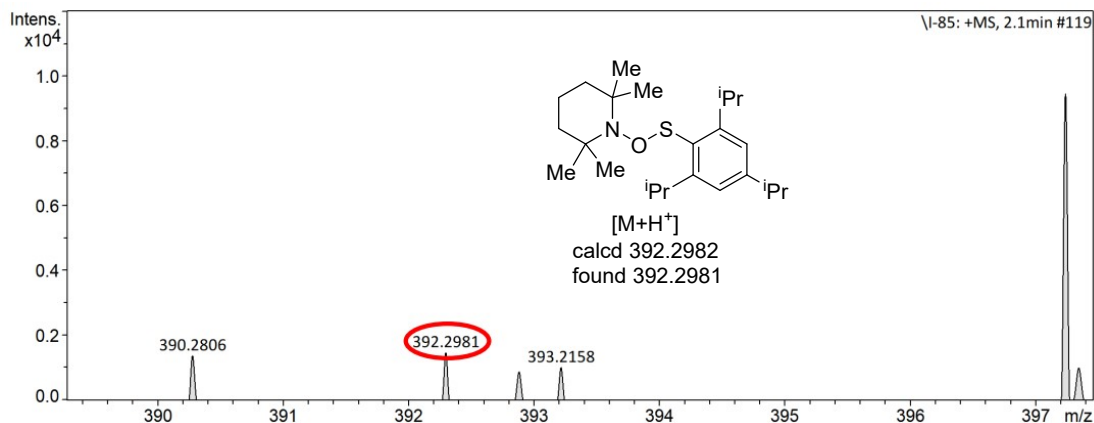

Figure S1. HRMS data of the reaction mixture

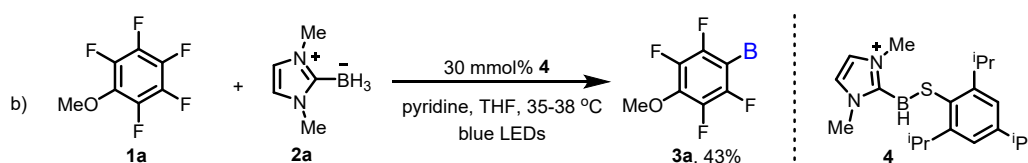

A 10 mL Schlenk-tube was charged with 2,3,4,5,6-pentafluoroanisole (20 mg, 0.1 mmol, 1.0 equiv.), NHC-borane **2a** (22 mg, 0.2 mmol, 2 equiv.), boryl sulphide **4** (10 mg, 0.03 mmol, 0.3 equiv.) and pyridine (24 mg, 0.3 mmol, 3 equiv.) in dry THF (2 mL) with magnetic stirring under N<sub>2</sub> atmosphere. The tube was placed at a distance (app. 5 cm) from 10W blue LEDs (390-400 nm) lamp and the mixture was stirred for 24 h at 35-38 °C. Then the reaction was added 5 mL 1M HCl, extracted with DCM (3 × 10 mL), dried over anhydrous Na<sub>2</sub>SO<sub>4</sub>, and evaporated under reduced pressure. Then the mixture was subjected to <sup>1</sup>H NMR to determine the yield (43%) using 1,3,5-methoxybenzenes as the internal standard.

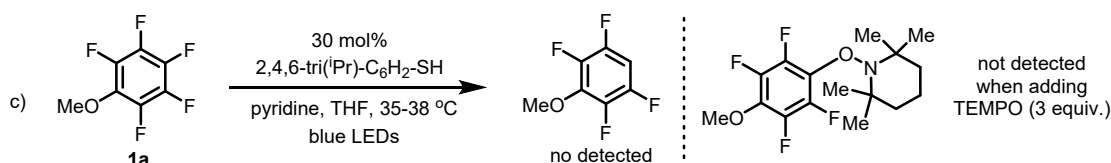

A 10 mL Schlenk-tube was charged with 2,3,4,5,6-pentafluoroanisole (20 mg, 0.1 mmol, 1.0 equiv.), 2,4,6-triisopropylthiophenol (7 mg, 0.03 mmol, 0.3 equiv.) and pyridine (24 mg, 0.3 mmol, 3 equiv.) in dry THF (2 mL) with magnetic stirring under N<sub>2</sub> atmosphere. The tube was placed at a distance (app. 5 cm) from 10W blue LEDs (390-400 nm) lamp and the mixture was stirred for 24 h at 35-38 °C. The hydrodefluorination product could not be formed by TLC detected. When this control experiment was added the 3 equiv. TEMPO, the fluoroaryl radical adduct with TEMPO could not be detected by HRMS detected.

## 5. EPR spectrum experiment.

EPR experiments were carried out using an X-Band spectrometer (MS 400 Magnettech). The radicals were produced at room temperature under a light exposure

under N<sub>2</sub> and trapped by phenyl-N-<sup>t</sup>butylnitrone (PBN).

## 6. General Experimental Procedure for the formation of boryl sulfides

A 10 mL Schlenk-tube was charged with NHC-borane (0.5 mmol, 1 equiv.), thiol (0.5 mmol, 1 equiv.) in dry THF (5 mL) with magnetic stirring under N<sub>2</sub> atmosphere. The tube was placed at a distance (app. 5 cm) from 10W blue LEDs (390-400 nm) lamp and the mixture was stirred for 24 h. Then the reaction was added 5 mL H<sub>2</sub>O, extracted with DCM (3 × 20 mL), dried over anhydrous Na<sub>2</sub>SO<sub>4</sub>, and evaporated under reduced pressure. The residue was purified by column chromatography (Petroleum ether: EtOAc) on silica gel to obtain the final products.

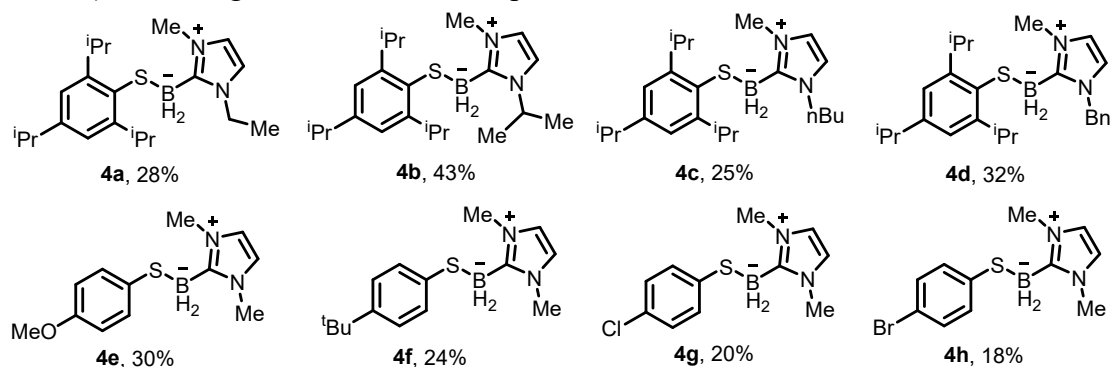

## 7. Characterization data of products.

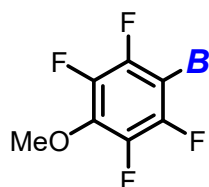

(1,3-dimethyl-1H-imidazol-3-ium-2-yl)(2,3,5,6-tetrafluoro-4-methoxyphenyl) dihydroborate (**3a**): Colorless liquid (44 mg, 76% yield); Gradient eluent: EtOAc/petroleum ether: 1/4 to 1/2.

<sup>1</sup>H NMR (600 MHz, CDCl<sub>3</sub>) δ 6.85 (s, 2H), 3.96 (s, 2H), 3.89 (s, 1H), 3.74 (s, 6H), 2.17 (dd, *J* = 177.1, 87.8 Hz, 3H).

<sup>19</sup>F NMR (565 MHz, CDCl<sub>3</sub>) δ -134.45 – -134.49 (m, 2F), -160.29 (dd, *J* = 24.7, 10.7 Hz, 2F);

<sup>13</sup>C NMR (151 MHz, CDCl<sub>3</sub>) δ 149.0 – 148.8 (m), 147.5 – 147.3 (m), 141.5 – 141.3 (m), 139.8 – 139.7 (m), 134.7 – 134.6 (m), 120.6, 62.1, 35.9.

<sup>11</sup>B NMR (193 MHz, CDCl<sub>3</sub>) δ -32.54 (t, *J* = 90.7 Hz).

<sup>11</sup>B{<sup>1</sup>H} NMR (193 MHz, CDCl<sub>3</sub>) δ -32.54.

<sup>1</sup>H{<sup>11</sup>B} NMR (600 MHz, CDCl<sub>3</sub>) δ 6.85 (s, 2H), 3.96 (s, 2H), 3.89 (s, 1H), 3.74 (s, 6H), 2.18 (s, 2H).

Characterization agrees with previous reports for this compound.<sup>3</sup>

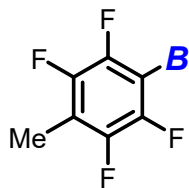

(1,3-dimethyl-1H-imidazol-3-ium-2-yl)(2,3,5,6-tetrafluoro-4-methylphenyl) dihydroborate (**3b**): White solid (37 mg, 68% yield); Gradient eluent: EtOAc/petroleum ether: 1/4 to 1/2.

$^1\text{H NMR}$  (600 MHz,  $\text{CDCl}_3$ )  $\delta$  6.84 (s, 2H), 3.75 (s, 6H), 2.16 (s, 2H), 2.08 (s, 1H).

$^{19}\text{F NMR}$  (565 MHz,  $\text{CDCl}_3$ )  $\delta$  -135.14 – -135.31 (m, 2F), -147.21 (dd,  $J = 24.7$ , 14.3 Hz, 2F).

$^{13}\text{C NMR}$  (151 MHz,  $\text{CDCl}_3$ )  $\delta$  148.7 – 148.5 (m), 147.2 – 146.9 (m), 145.4 – 145.3 (m), 143.8 – 143.7 (m), 120.5, 111.0 (t,  $J = 19.6$  Hz), 35.9, 7.3.

$^{11}\text{B NMR}$  (193 MHz,  $\text{CDCl}_3$ )  $\delta$  -32.39 (t,  $J = 88.8$  Hz).

$^{11}\text{B}\{^1\text{H}\}$  NMR (193 MHz,  $\text{CDCl}_3$ )  $\delta$  -32.39.

$^1\text{H}\{^{11}\text{B}\}$  NMR (600 MHz,  $\text{CDCl}_3$ )  $\delta$  6.84 (s, 2H), 3.75 (s, 6H), 2.16 (s, 2H), 2.08 (s, 1H).

Characterization agrees with previous reports for this compound.<sup>3</sup>

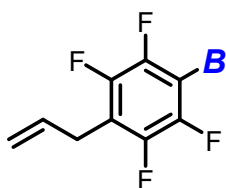

(4-allyl-2,3,5,6-tetrafluorophenyl)(1,3-dimethyl-1H-imidazol-3-ium-2-yl) dihydroborate (**3c**): Colorless liquid (49 mg, 82% yield); Gradient eluent: EtOAc/petroleum ether: 1/4 to 1/2.

$^1\text{H NMR}$  (600 MHz,  $\text{CDCl}_3$ )  $\delta$  6.84 (s, 2H), 5.94 – 5.85 (m, 1H), 5.05 – 4.98 (m, 2H), 3.75 (s, 6H), 3.35 (dd,  $J = 46.2$ , 6.2 Hz, 2H), 2.22 (dd,  $J = 176.6$ , 87.0 Hz, 2H).

$^{19}\text{F NMR}$  (565 MHz,  $\text{CDCl}_3$ )  $\delta$  -134.53 – -134.57 (m, 2F), -147.98 (dd,  $J = 24.7$ , 14.3 Hz, 2F).

$^{13}\text{C NMR}$  (151 MHz,  $\text{CDCl}_3$ )  $\delta$  148.8 – 148.6 (m), 147.2 – 147.0 (m), 145.2 – 144.9 (m), 143.5 – 143.3 (m), 134.7 (d,  $J = 111.9$  Hz), 120.5 (d,  $J = 13.5$  Hz), 115.7 (d,  $J = 86.9$  Hz), 113.2 (t,  $J = 23.2$  Hz), 36.0, 26.8 (t,  $J = 2.9$  Hz).

$^{11}\text{B NMR}$  (193 MHz,  $\text{CDCl}_3$ ) -32.36 (t,  $J = 88.8$  Hz).

$^{11}\text{B}\{^1\text{H}\}$  NMR (193 MHz,  $\text{CDCl}_3$ )  $\delta$  -32.36.

$^1\text{H}\{^{11}\text{B}\}$  NMR (600 MHz,  $\text{CDCl}_3$ )  $\delta$  6.84 (s, 2H), 5.93 – 5.85 (m, 1H), 5.06 – 4.98 (m, 2H), 3.75 (s, 6H), 3.35 (dd,  $J = 47.3$ , 6.1 Hz, 2H), 2.22 (s, 2H).

HRMS (ESI-TOF)  $m/z$ :  $[\text{M} + \text{Na}]^+$  cacl. for  $\text{C}_{14}\text{H}_{15}\text{BF}_4\text{N}_2\text{Na}^+$  321.1157; found: 321.1149.



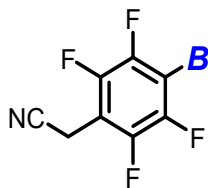

(4-(cyanomethyl)-2,3,5,6-tetrafluorophenyl)(1,3-dimethyl-1H-imidazol-3-ium-2-yl) dihydroborate (**3d**): Colorless liquid (52 mg, 88% yield); Gradient eluent: EtOAc/petroleum ether: 1/2 to 1/1.

$^1\text{H}$  NMR (600 MHz,  $\text{CDCl}_3$ )  $\delta$  6.87 (s, 2H), 3.75 (s, 6H), 3.70 (s, 2H), 2.21 (dd,  $J = 179.2, 86.6$  Hz, 2H).

$^{19}\text{F}$  NMR (565 MHz,  $\text{CDCl}_3$ )  $\delta$  -132.53 (s, 2F), 145.76 (dd,  $J = 24.0, 13.8$  Hz, 2F).

$^{13}\text{C}$  NMR (151 MHz,  $\text{CDCl}_3$ )  $\delta$  148.9 – 148.7 (m), 147.3 – 147.1 (m), 144.8 – 144.6 (m), 143.2 – 143.0 (m), 120.7, 116.1 (d,  $J = 96.5$  Hz), 104.0 (t,  $J = 22.2$  Hz), 36.0, 11.3.

$^{11}\text{B}$  NMR (193 MHz,  $\text{CDCl}_3$ )  $\delta$  -32.35 (t,  $J = 90.7$  Hz).

$^{11}\text{B}\{^1\text{H}\}$  NMR (193 MHz,  $\text{CDCl}_3$ )  $\delta$  -32.36.

$^1\text{H}\{^{11}\text{B}\}$  NMR (600 MHz,  $\text{CDCl}_3$ )  $\delta$  6.87 (s, 2H), 3.75 (s, 6H), 3.70 (s, 2H), 2.21 (s, 2H).

Characterization agrees with previous reports for this compound.<sup>3</sup>

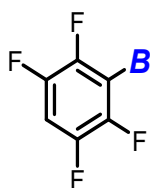

(1,3-dimethyl-1H-imidazol-3-ium-2-yl)(2,3,5,6-tetrafluorophenyl) dihydroborate (**3e**): White solid (39 mg, 76% yield); Gradient eluent: EtOAc/petroleum ether: 1/4 to 1/2.

$^1\text{H}$  NMR (600 MHz,  $\text{CDCl}_3$ )  $\delta$  6.85 (s, 2H), 6.73 – 6.67 (m, 1H), 3.75 (s, 6H), 2.23 (dd,  $J = 177.8, 87.9$  Hz, 2H).

$^{19}\text{F}$  NMR (565 MHz,  $\text{CDCl}_3$ )  $\delta$  -133.95 – -134.11 (m, 2F), -142.40 (dd,  $J = 24.5, 14.3$  Hz, 2F).

$^{13}\text{C}$  NMR (151 MHz,  $\text{CDCl}_3$ )  $\delta$  148.8 – 148.6 (m), 147.2 – 147.0 (m), 146.3 – 146.2 (m), 144.7 – 144.5 (m), 101.6 (t,  $J = 29.0$  Hz), 36.0.

$^{11}\text{B}$  NMR (193 MHz,  $\text{CDCl}_3$ )  $\delta$  -32.27 (t,  $J = 89.7$  Hz).

$^{11}\text{B}\{^1\text{H}\}$  NMR (193 MHz,  $\text{CDCl}_3$ )  $\delta$  -32.26.

$^1\text{H}\{^{11}\text{B}\}$  NMR (600 MHz,  $\text{CDCl}_3$ )  $\delta$  6.85 (s, 2H), 6.73 – 6.67 (m, 1H), 3.75 (s, 6H), 2.23 (s, 2H).

Characterization agrees with previous reports for this compound.<sup>3</sup>

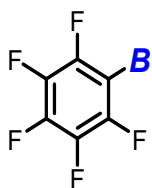

(1,3-dimethyl-1H-imidazol-3-ium-2-yl)(perfluorophenyl) dihydroborate (**3f**): White

solid (43 mg, 78% yield); Gradient eluent: EtOAc/petroleum ether: 1/4 to 1/2.

$^1\text{H NMR}$  (600 MHz,  $\text{CDCl}_3$ )  $\delta$  6.86 (s, 2H), 3.75 (s, 6H), 2.18 (dd,  $J = 179.2, 88.8$  Hz, 3H).

$^{19}\text{F NMR}$  (565 MHz,  $\text{CDCl}_3$ )  $\delta$  -133.10 – -133.14 (m, 2F), -161.91 (t,  $J = 20.2$  Hz, 1F), -165.14 (dt,  $J = 24.7, 9.1$  Hz, 2F).

$^{13}\text{C NMR}$  (151 MHz,  $\text{CDCl}_3$ )  $\delta$  148.8 – 148.5 (m), 147.2 – 146.9 (m), 139.0 – 138.7 (m), 137.7 – 137.2 (m), 136.2 – 135.8 (m), 120.7, 36.0.

$^{11}\text{B NMR}$  (193 MHz,  $\text{CDCl}_3$ )  $\delta$  -32.59 (d,  $J = 90.7$  Hz).

$^{11}\text{B}\{^1\text{H}\}$  NMR (193 MHz,  $\text{CDCl}_3$ )  $\delta$  -32.59.

$^1\text{H}\{^{11}\text{B}\}$  NMR (600 MHz,  $\text{CDCl}_3$ )  $\delta$  6.86 (s, 2H), 3.75 (s, 6H), 2.19 (s, 2H).

Characterization agrees with previous reports for this compound.<sup>3</sup>

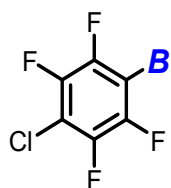

(4-chloro-2,3,5,6-tetrafluorophenyl)(1,3-dimethyl-1H-imidazol-3-ium-2-yl) dihydroborate (**3g**): White solid (39 mg, 67% yield); Gradient eluent: EtOAc/petroleum ether: 1/4 to 1/2.

$^1\text{H NMR}$  (600 MHz,  $\text{CDCl}_3$ )  $\delta$  6.87 (s, 2H), 3.75 (s, 6H), 2.42 – 1.98 (m, 2H).

$^{19}\text{F NMR}$  (565 MHz,  $\text{CDCl}_3$ )  $\delta$  -132.13 (d,  $J = 13.4$  Hz, 2F), -144.81 (td,  $J = 14.2, 5.1$  Hz, 2F).

$^{13}\text{C NMR}$  (151 MHz,  $\text{CDCl}_3$ )  $\delta$  149.0 – 148.8 (m), 147.5 – 147.2 (m), 144.2 – 144.0 (m), 142.6 – 142.4 (m), 120.7, 106.8 – 106.5 (m), 36.0.

$^{11}\text{B NMR}$  (193 MHz,  $\text{CDCl}_3$ )  $\delta$  -32.39 (t,  $J = 88.8$  Hz).

$^{11}\text{B}\{^1\text{H}\}$  NMR (193 MHz,  $\text{CDCl}_3$ )  $\delta$  -32.40.

$^1\text{H}\{^{11}\text{B}\}$  NMR (600 MHz,  $\text{CDCl}_3$ )  $\delta$  6.86 (s, 2H), 3.75 (s, 6H), 2.20 (s, 2H).

Characterization agrees with previous reports for this compound.<sup>3</sup>

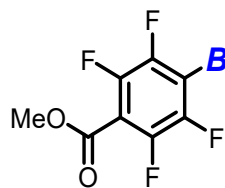

(1,3-dimethyl-1H-imidazol-3-ium-2-yl)(2,3,5,6-tetrafluoro-4-(methoxycarbonyl)phenyl)dihydroborate (**3h**): White solid (50 mg, 79% yield); Gradient eluent: EtOAc/petroleum ether: 1/2 to 1/1.

$^1\text{H NMR}$  (600 MHz,  $\text{CDCl}_3$ )  $\delta$  6.87 (s, 2H), 3.92 (s, 3H), 3.74 (s, 6H), 2.44 – 2.00 (m, 2H).

$^{19}\text{F NMR}$  (565 MHz,  $\text{CDCl}_3$ )  $\delta$  -132.74 (s, 2F), -142.66 – -142.82 (m, 2F).

$^{13}\text{C NMR}$  (151 MHz,  $\text{CDCl}_3$ )  $\delta$  161.8 – 161.5 (m), 149.0 – 148.7 (m), 147.4 – 147.2 (m), 145.2 – 144.9 (m), 143.4 – 143.1 (m), 120.6, 107.9 (t,  $J = 15.9$  Hz), 52.7, 36.0.

$^{11}\text{B NMR}$  (193 MHz,  $\text{CDCl}_3$ )  $\delta$  -32.25 (t,  $J = 90.7$  Hz).

$^{11}\text{B}\{^1\text{H}\}$  NMR (193 MHz,  $\text{CDCl}_3$ )  $\delta$  -32.25.

$^1\text{H}\{^{11}\text{B}\}$  NMR (600 MHz,  $\text{CDCl}_3$ )  $\delta$  6.87 (s, 2H), 3.92 (s, 3H), 3.74 (s, 6H), 2.22 (s, 2H).

Characterization agrees with previous reports for this compound.<sup>3</sup>

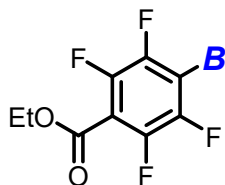

(1,3-dimethyl-1H-imidazol-3-ium-2-yl)(4-(ethoxycarbonyl)-2,3,5,6-tetrafluorophenyl) dihydroborate (**3i**): White solid (50 mg, 76% yield); Gradient eluent: DCM/petroleum ether: 1/2 to 1/1.

$^1\text{H}$  NMR (600 MHz,  $\text{CDCl}_3$ )  $\delta$  6.87 (s, 2H), 4.38 (q,  $J = 7.1$  Hz, 2H), 3.73 (s, 6H), 2.22 (dd,  $J = 178.4, 84.6$  Hz, 2H), 1.36 (t,  $J = 7.1$  Hz, 3H).

$^{19}\text{F}$  NMR (565 MHz,  $\text{CDCl}_3$ )  $\delta$  -132.84 (s, 2F), -143.05 (dd,  $J = 21.8, 11.6$  Hz, 2F).

$^{13}\text{C}$  NMR (151 MHz,  $\text{CDCl}_3$ )  $\delta$  161.2 – 161.1 (m), 148.9 – 148.7 (m), 147.4 – 147.1 (m), 145.0 – 144.8 (m), 143.3 – 143.1 (m), 120.7, 108.4 (t,  $J = 15.1$  Hz), 61.9, 36.0, 14.1.

$^{11}\text{B}$  NMR (193 MHz,  $\text{CDCl}_3$ )  $\delta$  -32.26 (t,  $J = 90.7$  Hz).

$^{11}\text{B}\{^1\text{H}\}$  NMR (193 MHz,  $\text{CDCl}_3$ )  $\delta$  -32.26.

$^1\text{H}\{^{11}\text{B}\}$  NMR (600 MHz,  $\text{CDCl}_3$ )  $\delta$  6.87 (s, 2H), 4.38 (q,  $J = 7.1$  Hz, 2H), 3.73 (s, 6H), 2.22 (s, 2H), 1.36 (t,  $J = 7.1$  Hz, 3H).

Characterization agrees with previous reports for this compound.<sup>3</sup>

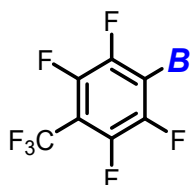

(1,3-dimethyl-1H-imidazol-3-ium-2-yl)(2,3,5,6-tetrafluoro-4-(trifluoromethyl) phenyl) dihydroborate (**3j**): White solid (55 mg, 84% yield); Gradient eluent: EtOAc/petroleum ether: 1/2 to 1/1.

$^1\text{H}$  NMR (600 MHz,  $\text{CDCl}_3$ )  $\delta$  6.89 (s, 2H), 3.75 (s, 6H), 2.23 (dd,  $J = 178.2, 88.6$  Hz, 3H).

$^{19}\text{F}$  NMR (565 MHz,  $\text{CDCl}_3$ )  $\delta$  -55.99 (t,  $J = 19.8$  Hz, 3F), -131.96 (s, 2F), -144.41 – -144.59 (m, 2F).

$^{13}\text{C}$  NMR (151 MHz,  $\text{CDCl}_3$ )  $\delta$  149.2 – 148.9 (m), 147.5 – 147.3 (m), 144.1 – 143.9 (m), 142.4 – 142.2 (m), 122.5 (q,  $J = 90.1$  Hz), 120.8, 36.0.

$^{11}\text{B}$  NMR (193 MHz,  $\text{CDCl}_3$ )  $\delta$  -32.29 (t,  $J = 90.7$  Hz).

$^{11}\text{B}\{^1\text{H}\}$  NMR (193 MHz,  $\text{CDCl}_3$ )  $\delta$  -32.29.

$^1\text{H}\{^{11}\text{B}\}$  NMR (600 MHz,  $\text{CDCl}_3$ )  $\delta$  6.88 (s, 2H), 3.75 (s, 6H), 2.24 (s, 2H).

Characterization agrees with previous reports for this compound.<sup>3</sup>

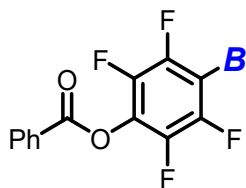

(4-(benzoyloxy)-2,3,5,6-tetrafluorophenyl)(1,3-dimethyl-1H-imidazol-3-ium-2-yl) dihydroborate (**3k**): White solid (65 mg, 86% yield); Gradient eluent: EtOAc/petroleum ether: 1/4 to 1/2.

$^1\text{H NMR}$  (600 MHz,  $\text{CDCl}_3$ )  $\delta$  8.22 – 8.16 (m, 2H), 7.65 (q,  $J = 7.9$  Hz, 1H), 7.51 (q,  $J = 7.7$  Hz, 2H), 6.86 (s, 2H), 3.77 (s, 6H), 2.24 (dd,  $J = 179.1, 83.4$  Hz, 2H).

$^{19}\text{F NMR}$  (565 MHz,  $\text{CDCl}_3$ )  $\delta$  -133.52 (d,  $J = 18.5$  Hz, 2F), -156.48 (td,  $J = 13.4, 4.2$  Hz, 2F).

$^{13}\text{C NMR}$  (151 MHz,  $\text{CDCl}_3$ )  $\delta$  163.4, 149.1 – 148.5 (m), 147.3 – 147.0 (m), 142.8 – 142.5 (m), 141.0 – 140.6 (m), 139.2 – 139.0, 134.2, 130.6, 128.7, 127.9, 120.7, 36.0.

$^{11}\text{B NMR}$  (193 MHz,  $\text{CDCl}_3$ )  $\delta$  -32.42 (t,  $J = 79.1$  Hz).

$^{11}\text{B}\{^1\text{H}\}$  NMR (193 MHz,  $\text{CDCl}_3$ )  $\delta$  -32.46.

$^1\text{H}\{^{11}\text{B}\}$  NMR (600 MHz,  $\text{CDCl}_3$ )  $\delta$  8.23 – 8.17 (m, 2H), 7.65 (q,  $J = 7.8$  Hz, 1H), 7.51 (q,  $J = 7.6$  Hz, 2H), 6.85 (d,  $J = 17.6$  Hz, 2H), 3.76 (d,  $J = 14.7$  Hz, 6H), 2.25 (s, 2H).

Characterization agrees with previous reports for this compound.<sup>3</sup>

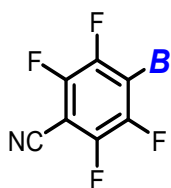

(4-cyano-2,3,5,6-tetrafluorophenyl)(1,3-dimethyl-1H-imidazol-3-ium-2-yl) dihydroborate (**3l**): White solid (21 mg, 37% yield); Gradient eluent: DCM/petroleum ether: 1/2 to 1/1.

$^1\text{H NMR}$  (600 MHz,  $\text{CDCl}_3$ )  $\delta$  6.90 (s, 2H), 3.74 (s, 6H), 2.23 (dd,  $J = 180.4, 88.6$  Hz, 3H).

$^{19}\text{F NMR}$  (565 MHz,  $\text{CDCl}_3$ )  $\delta$  -130.45 (s, 2F), -136.21 – -136.43 (m, 2F).

$^{13}\text{C NMR}$  (151 MHz,  $\text{CDCl}_3$ )  $\delta$  148.6 – 148.4 (m), 147.2 – 147.0 (m), 147.0 – 146.9 (m), 145.5 – 145.3 (m), 120.9, 109.2 (t,  $J = 4.5$  Hz), 89.3 – 89.1 (m), 36.1.

$^{11}\text{B NMR}$  (193 MHz,  $\text{CDCl}_3$ )  $\delta$  -32.11 (t,  $J = 90.7$  Hz).

$^{11}\text{B}\{^1\text{H}\}$  NMR (193 MHz,  $\text{CDCl}_3$ )  $\delta$  -32.12.

$^1\text{H}\{^{11}\text{B}\}$  NMR (600 MHz,  $\text{CDCl}_3$ )  $\delta$  6.90 (s, 2H), 3.74 (s, 6H), 2.23 (s, 2H).

Characterization agrees with previous reports for this compound.<sup>3</sup>

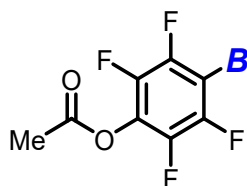

(4-acetoxy-2,3,5,6-tetrafluorophenyl)(1,3-dimethyl-1H-imidazol-3-ium-2-yl)

dihydroborate (**3m**): Colorless liquid (51 mg, 81% yield); Gradient eluent: DCM/petroleum ether: 1/2 to 1/1. Gradient eluent: EtOAc/petroleum ether: 1/4 to 1/2.  $^1\text{H NMR}$  (600 MHz,  $\text{CDCl}_3$ )  $\delta$  6.85 (s, 2H), 3.75 (s, 6H), 2.35 (s, 3H), 2.12 (dd,  $J = 126.1, 86.0$  Hz, 2H).

$^{19}\text{F NMR}$  (565 MHz,  $\text{CDCl}_3$ )  $\delta$  -133.55 – -133.75 (m, 2F), -156.83 (td,  $J = 13.4, 4.1$  Hz).

$^{13}\text{C NMR}$  (151 MHz,  $\text{CDCl}_3$ )  $\delta$  167.5, 151.1 – 150.8 (m), 148.7 – 148.5 (m), 147.3 – 146.9 (m), 140.7 – 140.4 (m), 139.0 – 138.8 (m), 120.7, 36.0, 20.1.

$^{11}\text{B NMR}$  (193 MHz,  $\text{CDCl}_3$ )  $\delta$  -32.48 (t,  $J = 92.6$  Hz).

$^{11}\text{B}\{^1\text{H}\}$  NMR (193 MHz,  $\text{CDCl}_3$ )  $\delta$  -32.47.

$^1\text{H}\{^{11}\text{B}\}$  NMR (600 MHz,  $\text{CDCl}_3$ )  $\delta$  6.85 (s, 2H), 3.75 (s, 6H), 2.35 (s, 3H), 2.21 (s, 2H).

HRMS (ESI-TOF)  $m/z$ :  $[\text{M} + \text{Na}]^+$  cacl. for  $\text{C}_{13}\text{H}_{13}\text{BF}_4\text{N}_2\text{NaO}_2^+$  339.0898; found: 339.0892.

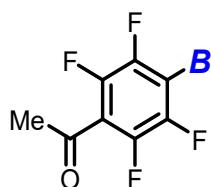

(4-acetyl-2,3,5,6-tetrafluorophenyl)(1,3-dimethyl-1H-imidazol-3-ium-2-yl)dihydroborate (**3n**): White solid (21 mg, 35% yield); Gradient eluent: DCM/petroleum ether: 1/2 to 1/1. Gradient eluent: EtOAc/petroleum ether: 1/2 to 1/1.  $^1\text{H NMR}$  (600 MHz,  $\text{CDCl}_3$ )  $\delta$  6.88 (s, 2H), 3.75 (s, 6H), 2.57 (t,  $J = 2.0$  Hz, 3H), 2.22 (dd,  $J = 178.2, 92.5$  Hz, 2H).

$^{19}\text{F NMR}$  (565 MHz,  $\text{CDCl}_3$ )  $\delta$  -132.84 (s, 2F), -144.54 (dd,  $J = 24.3, 14.1$  Hz, 2F).

$^{13}\text{C NMR}$  (151 MHz,  $\text{CDCl}_3$ )  $\delta$  193.7, 149.0 – 148.8 (m), 147.4 – 147.2 (m), 144.5 – 144.3 (m), 142.8 – 142.6 (m), 120.7, 115.6 – 115.3 (m), 36.0, 32.5 (t,  $J = 3.0$  Hz).

$^{11}\text{B NMR}$  (193 MHz,  $\text{CDCl}_3$ )  $\delta$  -32.25 (t,  $J = 92.6$  Hz).

$^{11}\text{B}\{^1\text{H}\}$  NMR (193 MHz,  $\text{CDCl}_3$ )  $\delta$  -32.26.

$^1\text{H}\{^{11}\text{B}\}$  NMR (600 MHz,  $\text{CDCl}_3$ )  $\delta$  6.87 (s, 2H), 3.75 (s, 6H), 2.57 (t,  $J = 1.9$  Hz, 3H), 2.23 (s, 2H).

Characterization agrees with previous reports for this compound.<sup>3</sup>

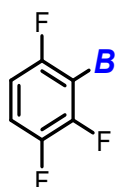

(1,3-dimethyl-1H-imidazol-3-ium-2-yl)(2,3,6-trifluorophenyl)dihydroborate (**3o**): Colorless liquid (26 mg, 54% yield); Gradient eluent: EtOAc/petroleum ether: 1/2 to 1/1.

$^1\text{H NMR}$  (600 MHz,  $\text{CDCl}_3$ )  $\delta$  6.83 (s, 2H), 6.80 – 6.74 (m, 1H), 6.61 – 6.55 (m, 1H), 3.75 (s, 6H), 2.22 (dd,  $J = 176.3, 88.7$  Hz, 2H).

<sup>19</sup>F NMR (565 MHz, CDCl<sub>3</sub>) δ -108.93 (s, 1F), -128.09 (d, *J* = 21.8 Hz, 1F), -145.80 (dd, *J* = 23.8, 16.3 Hz, 1F).

<sup>13</sup>C NMR (151 MHz, CDCl<sub>3</sub>) δ 161.2 (dd, *J* = 234.1, 13.6 Hz), 153.5 – 151.8 (m), 148.0 – 146.2 (m), 120.5, 112.6 – 112.4 (m), 109.3 – 109.0 (m), 36.0.

<sup>11</sup>B NMR (193 MHz, CDCl<sub>3</sub>) δ -32.33 (t, *J* = 90.7 Hz).

<sup>11</sup>B{<sup>1</sup>H} NMR (193 MHz, CDCl<sub>3</sub>) δ -32.33.

<sup>1</sup>H{<sup>11</sup>B} NMR (600 MHz, CDCl<sub>3</sub>) δ 6.83 (s, 2H), 6.77 (tt, *J* = 9.3, 4.6 Hz, 1H), 6.58 (ddd, *J* = 10.9, 6.4, 2.0 Hz, 1H), 3.76 (s, 6H), 2.22 (s, 2H).

Characterization agrees with previous reports for this compound.<sup>4</sup>

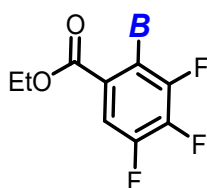

(1,3-dimethyl-1H-imidazol-3-ium-2-yl)(6-(ethoxycarbonyl)-2,3,4-trifluorophenyl) dihydroborate (**3p**): Colorless liquid (42 mg, 67% yield); Gradient eluent: EtOAc/petroleum ether: 1/2 to 1/1.

<sup>1</sup>H NMR (600 MHz, CDCl<sub>3</sub>) δ 7.17 (ddd, *J* = 8.2, 4.7, 2.0 Hz, 1H), 6.86 (s, 2H), 4.34 (q, *J* = 7.1 Hz, 2H), 3.73 (s, 6H), 2.43 – 1.99 (m, 2H), 1.36 (t, *J* = 7.1 Hz, 3H).

<sup>19</sup>F NMR (565 MHz, CDCl<sub>3</sub>) δ -108.30 (d, *J* = 13.2 Hz, 1F), -127.05 (d, *J* = 21.7 Hz, 1F), -143.12 (dd, *J* = 22.5, 16.3 Hz, 1F).

<sup>13</sup>C NMR (151 MHz, CDCl<sub>3</sub>) δ 163.7 (q, *J* = 3.5 Hz), 160.1 (ddd, *J* = 235.6, 14.4, 3.0 Hz), 154.2 – 152.4 (m), 146.9 (ddd, *J* = 250.7, 18.1, 3.0 Hz), 120.6, 116.2 (t, *J* = 9.1 Hz), 110.8 (dd, *J* = 31.7, 3.0 Hz), 61.3, 36.0, 14.2.

<sup>11</sup>B NMR (193 MHz, CDCl<sub>3</sub>) δ -32.24 (t, *J* = 88.8 Hz).

<sup>11</sup>B{<sup>1</sup>H} NMR (193 MHz, CDCl<sub>3</sub>) δ -32.24.

<sup>1</sup>H{<sup>11</sup>B} NMR (600 MHz, CDCl<sub>3</sub>) δ 7.19 – 7.15 (m, 1H), 6.86 (s, 2H), 4.34 (q, *J* = 7.1 Hz, 2H), 3.73 (s, 6H), 2.21 (s, 2H), 1.36 (t, *J* = 7.1 Hz, 3H).

Characterization agrees with previous reports for this compound.<sup>4</sup>

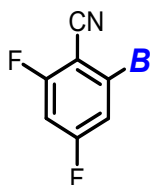

(2-cyano-3,5-difluorophenyl)(1,3-dimethyl-1H-imidazol-3-ium-2-yl)dihydroborate (**3q**): White solid (37 mg, 75% yield); Gradient eluent: EtOAc/petroleum ether: 1/2 to 1/1.

<sup>1</sup>H NMR (600 MHz, CDCl<sub>3</sub>) δ 6.94 (d, *J* = 8.1 Hz, 1H), 6.91 (s, 2H), 6.56 (td, *J* = 9.0, 2.4 Hz, 1H), 3.70 (s, 6H), 2.41 (dd, *J* = 175.7, 87.1 Hz, 2H).

<sup>19</sup>F NMR (565 MHz, CDCl<sub>3</sub>) δ -103.80 (d, *J* = 10.1 Hz, 1F), -105.10 (d, *J* = 10.0 Hz, 1F).

<sup>13</sup>C NMR (151 MHz, CDCl<sub>3</sub>) δ 165.5 – 163.5 (m), 122.8, 121.0, 117.8 (d, *J* = 18.1

Hz), 115.4, 101.1 (dd,  $J = 10.6, 3.0$  Hz), 100.1 (q,  $J = 17.1$  Hz), 36.4.

$^{11}\text{B}$  NMR (193 MHz,  $\text{CDCl}_3$ )  $\delta$  -25.65 (t,  $J = 86.9$  Hz).

$^{11}\text{B}\{^1\text{H}\}$  NMR (193 MHz,  $\text{CDCl}_3$ )  $\delta$  -25.66.

$^1\text{H}\{^{11}\text{B}\}$  NMR (600 MHz,  $\text{CDCl}_3$ )  $\delta$  6.93 (dd,  $J = 9.1, 1.9$  Hz, 1H), 6.91 (s, 2H), 6.56 (td,  $J = 9.0, 2.4$  Hz, 1H), 3.70 (s, 6H), 2.41 (s, 2H).

Characterization agrees with previous reports for this compound.<sup>4</sup>

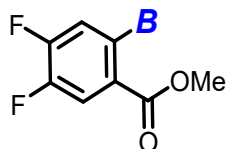

(4,5-difluoro-2-(methoxycarbonyl)phenyl)(1,3-dimethyl-1H-imidazol-3-ium-2-yl)dihydroborate (**3r**): White solid (19 mg, 34% yield); Gradient eluent: EtOAc/petroleum ether: 1/2 to 1/1.

$^1\text{H}$  NMR (600 MHz,  $\text{CDCl}_3$ )  $\delta$  7.30 (dd,  $J = 8.6, 5.6$  Hz, 1H), 7.07 (d,  $J = 8.3$  Hz, 1H), 6.86 (s, 2H), 3.87 (s, 3H), 3.72 (s, 6H), 2.25 (dd,  $J = 174.0, 87.7$  Hz, 2H).

$^{19}\text{F}$  NMR (565 MHz,  $\text{CDCl}_3$ )  $\delta$  -113.05 (d,  $J = 19.1$  Hz, 2F), -119.18 (d,  $J = 19.5$  Hz, 2F).

$^{13}\text{C}$  NMR (151 MHz,  $\text{CDCl}_3$ )  $\delta$  164.9 (dd,  $J = 4.5, 3.0$  Hz), 161.4 (d,  $J = 234.1$  Hz), 157.7 (d,  $J = 255.2$  Hz), 124.4 (dd,  $J = 21.1, 12.1$  Hz), 120.6, 115.7 (d,  $J = 28.7$  Hz), 114.8 (dd,  $J = 12.5, 8.3$  Hz), 52.0, 36.1.

$^{11}\text{B}$  NMR (193 MHz,  $\text{CDCl}_3$ )  $\delta$  -27.98 (t,  $J = 86.9$  Hz).

$^{11}\text{B}\{^1\text{H}\}$  NMR (193 MHz,  $\text{CDCl}_3$ )  $\delta$  -27.98.

$^1\text{H}\{^{11}\text{B}\}$  NMR (600 MHz,  $\text{CDCl}_3$ )  $\delta$  7.30 (dd,  $J = 8.6, 5.6$  Hz, 1H), 7.07 (dd,  $J = 11.3, 4.8$  Hz, 1H), 6.86 (s, 2H), 3.87 (s, 3H), 3.72 (s, 6H), 2.25 (s, 2H).

Characterization agrees with previous reports for this compound.<sup>4</sup>

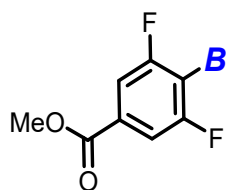

(2,6-difluoro-4-(methoxycarbonyl)phenyl)(1,3-dimethyl-1H-imidazol-3-ium-2-yl)dihydroborate (**3s**): White solid (49 mg, 88% yield); Gradient eluent: DCM/petroleum ether: 1/2 to 1/1.

$^1\text{H}$  NMR (600 MHz,  $\text{CDCl}_3$ )  $\delta$  7.30 (dd,  $J = 6.0, 1.6$  Hz, 2H), 6.83 (s, 2H), 3.85 (s, 3H), 3.72 (s, 6H), 2.21 (dd,  $J = 176.2, 86.0$  Hz, 2H).

$^{19}\text{F}$  NMR (565 MHz,  $\text{CDCl}_3$ )  $\delta$  -102.24 (s, 2F).

$^{13}\text{C}$  NMR (151 MHz,  $\text{CDCl}_3$ )  $\delta$  166.2 (t,  $J = 3.8$  Hz), 166.0 (dd,  $J = 240.09, 16.6$  Hz), 128.5 (t,  $J = 10.8$  Hz), 120.5, 111.0 (dd,  $J = 25.7, 7.6$  Hz), 52.1, 35.9.

$^{11}\text{B}$  NMR (193 MHz,  $\text{CDCl}_3$ )  $\delta$  -32.30 (t,  $J = 88.8$  Hz).

$^{11}\text{B}\{^1\text{H}\}$  NMR (193 MHz,  $\text{CDCl}_3$ )  $\delta$  -32.30.

$^1\text{H}\{^{11}\text{B}\}$  NMR (600 MHz,  $\text{CDCl}_3$ )  $\delta$  7.30 (dd,  $J = 5.9, 1.6$  Hz, 2H), 6.83 (s, 2H), 3.85 (s, 3H), 3.72 (s, 6H), 2.21 (s, 2H).

Characterization agrees with previous reports for this compound.<sup>4</sup>

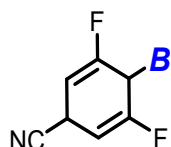

(4-cyano-2,6-difluorocyclohexa-2,5-dien-1-yl)(1,3-dimethyl-1H-imidazol-3-ium-2-yl) dihydroborate (**3t**): White solid (18 mg, 36% yield); Gradient eluent: DCM/petroleum ether: 1/2 to 1/1.

<sup>1</sup>H NMR (600 MHz, CDCl<sub>3</sub>) δ 6.89 (s, 2H), 4.80 (dt, *J* = 9.9, 4.9 Hz, 2H), 3.98 (d, *J* = 3.7 Hz, 1H), 3.79 (s, 6H), 2.54 (s, 1H), 1.78 (d, *J* = 93.9 Hz, 2H).

<sup>19</sup>F NMR (565 MHz, CDCl<sub>3</sub>) δ -99.16 (s, 2F).

<sup>13</sup>C NMR (151 MHz, CDCl<sub>3</sub>) δ 168.2 (dd, *J* = 259.7, 19.6 Hz), 121.3, 119.1, 89.8 (dd, *J* = 22.7 Hz), 36.2, 26.4 (t, *J* = 12.1 Hz).

<sup>11</sup>B NMR (193 MHz, CDCl<sub>3</sub>) δ -27.58 (t, *J* = 88.8 Hz).

<sup>11</sup>B{<sup>1</sup>H} NMR (193 MHz, CDCl<sub>3</sub>) δ -27.58.

<sup>1</sup>H{<sup>11</sup>B} NMR (600 MHz, CDCl<sub>3</sub>) δ 6.89 (s, 2H), 4.80 (dt, *J* = 9.9, 4.9 Hz, 2H), 4.00 – 3.95 (m, 1H), 3.79 (s, 6H), 2.54 (dq, *J* = 10.1, 5.0 Hz, 1H), 1.78 (s, 2H).

Characterization agrees with previous reports for this compound.<sup>4</sup>

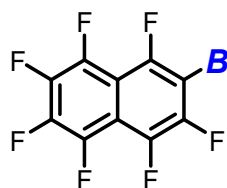

(1,3-dimethyl-1H-imidazol-3-ium-2-yl)(perfluoronaphthalen-2-yl)dihydroborate (**3u**): White solid (23 mg, 32% yield); Gradient eluent: EtOAc/petroleum ether: 1/2 to 1/1.

<sup>1</sup>H NMR (600 MHz, CDCl<sub>3</sub>) δ 6.89 (s, 2H), 3.79 (s, 6H), 2.32 (dd, *J* = 178.3, 87.0 Hz, 3H).

<sup>19</sup>F NMR (565 MHz, CDCl<sub>3</sub>) δ -110.74 (d, *J* = 70.5 Hz, 1F), -125.71 (s, 1F), -146.19 (dt, *J* = 71.2, 16.8 Hz, 1F), -148.51 (dtd, *J* = 20.4, 16.3, 3.4 Hz, 1F), -153.39 (dt, *J* = 55.7, 19.9 Hz, 1F), -158.71 (t, *J* = 18.6 Hz, 1F), -159.66 (t, *J* = 18.7 Hz).

<sup>13</sup>C NMR (151 MHz, CDCl<sub>3</sub>) δ 154.5 – 154.1 (m), 152.8 – 151.9 (m), 150.7 – 150.4 (m), 141.8 – 141.5 (m), 140.7 – 139.6 (m), 139.1 – 138.8 (m), 137.4 – 137.1 (m), 120.7, 36.0.

<sup>11</sup>B NMR (193 MHz, CDCl<sub>3</sub>) δ -32.18 (t, *J* = 86.9 Hz).

<sup>11</sup>B{<sup>1</sup>H} NMR (193 MHz, CDCl<sub>3</sub>) δ -32.19.

<sup>1</sup>H{<sup>11</sup>B} NMR (600 MHz, CDCl<sub>3</sub>) δ 6.89 (s, 2H), 3.79 (s, 6H), 2.33 (s, 2H).

Characterization agrees with previous reports for this compound.<sup>3</sup>



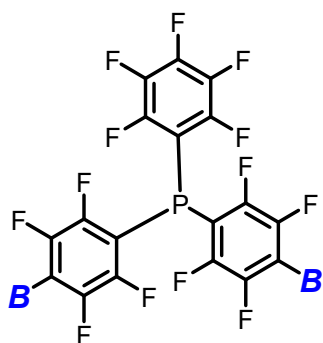

(4-(bis(perfluorophenyl)phosphanyl)-2,3,5,6-tetrafluorophenyl)(1,3-dimethyl-1H-imidazol-3-ium-2-yl)dihydroborate (**3v**): Colorless liquid (86 mg, 60% yield); Gradient eluent: DCM/petroleum ether: 1/2 to 1/1.

$^1\text{H NMR}$  (600 MHz,  $\text{CDCl}_3$ )  $\delta$  6.86 (s, 2H), 3.73 (s, 6H), 2.21 (dd,  $J = 176.3, 78.0$  Hz, 2H).

$^{31}\text{P NMR}$  (243 MHz,  $\text{CDCl}_3$ )  $\delta$  -74.41 – -75.01 (m).

$^{19}\text{F NMR}$  (565 MHz,  $\text{CDCl}_3$ )  $\delta$  -130.32 – -130.50 (m, 2F), -132.76 (dd,  $J = 22.9, 11.4$  Hz, 4F), -134.45 – -134.62 (m, 4F), -151.15 (t,  $J = 20.6$  Hz, 1F), -161.36 (dt,  $J = 22.2, 7.2$  Hz, 2F).

$^{13}\text{C NMR}$  (151 MHz,  $\text{CDCl}_3$ )  $\delta$  149.0 – 148.3 (m), 147.7 – 147.2 (m), 147.0 – 145.8 (m), 143.1 – 141.2 (m), 138.3 – 136.4 (m), 120.7, 108.0 – 107.5 (m), 104.9 – 104.5 (m), 36.0.

$^{11}\text{B NMR}$  (193 MHz,  $\text{CDCl}_3$ )  $\delta$  -32.20 (t,  $J = 88.8$  Hz).

$^{11}\text{B}\{^1\text{H}\}$  NMR (193 MHz,  $\text{CDCl}_3$ )  $\delta$  -32.19.

$^1\text{H}\{^{11}\text{B}\}$  NMR (600 MHz,  $\text{CDCl}_3$ )  $\delta$  6.85 (s, 2H), 3.73 (s, 6H), 2.21 (s, 2H).

HRMS (ESI-TOF)  $m/z$ :  $[\text{M} + \text{Na}]^+$  cacl. for  $\text{C}_{28}\text{H}_{20}\text{B}_2\text{F}_{13}\text{N}_4\text{NaP}^+$  735.1296; found: 735.1287.

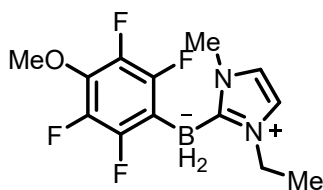

(3-ethyl-1-methyl-1H-imidazol-3-ium-2-yl)(2,3,5,6-tetrafluoro-4-methoxyphenyl)dihydroborate (**3w**): Colorless liquid (53 mg, 88% yield); Gradient eluent: EtOAc/petroleum ether: 1/4 to 1/2.

$^1\text{H NMR}$  (600 MHz,  $\text{CDCl}_3$ )  $\delta$  6.90 – 6.85 (m, 2H), 4.18 (qd,  $J = 7.3, 2.5$  Hz, 2H), 3.92 (d,  $J = 42.5$  Hz, 3H), 3.73 (s, 3H), 2.19 (dd,  $J = 177.1, 86.4$  Hz, 3H), 1.32 (dd,  $J = 13.4, 7.2$  Hz, 2H).

$^{19}\text{F NMR}$  (565 MHz,  $\text{CDCl}_3$ )  $\delta$  -134.46 – -134.63 (m, 2F), -165.31 (dd,  $J = 25.6, 20.5$  Hz, 2F).

$^{13}\text{C NMR}$  (151 MHz,  $\text{CDCl}_3$ )  $\delta$  149.0 – 148.7 (m), 147.5 – 147.2 (m), 141.5 – 141.2 (m), 139.9 – 139.6 (m), 135.0 – 134.5 (m), 120.9, 118.5, 62.1, 43.7, 35.8, 15.5.

$^{11}\text{B NMR}$  (193 MHz,  $\text{CDCl}_3$ )  $\delta$  -32.49 (t,  $J = 88.8$  Hz).

$^{11}\text{B}\{^1\text{H}\}$  NMR (193 MHz,  $\text{CDCl}_3$ )  $\delta$  -32.50.

$^1\text{H}\{^{11}\text{B}\}$  NMR (600 MHz,  $\text{CDCl}_3$ )  $\delta$  6.88 (d,  $J = 17.7$  Hz, 2H), 4.18 (qd,  $J = 7.3, 2.2$  Hz, 2H), 3.92 (d,  $J = 42.6$  Hz, 3H), 3.73 (s, 3H), 2.19 (s, 2H), 1.32 (dd,  $J = 13.6, 7.1$  Hz, 3H).

HRMS (ESI-TOF)  $m/z$ :  $[\text{M} + \text{Na}]^+$  cacl. for  $\text{C}_{13}\text{H}_{15}\text{BF}_4\text{N}_2\text{NaO}^+$  325.1106; found: 325.1104.

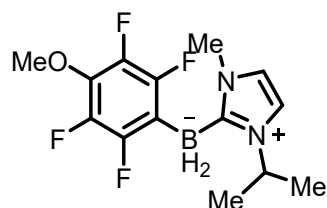

(3-isopropyl-1-methyl-1H-imidazol-3-ium-2-yl)(2,3,5,6-tetrafluoro-4-methoxyphenyl) dihydroborate (**3x**): Colorless liquid (53 mg, 83% yield); Gradient eluent: EtOAc/petroleum ether: 1/4 to 1/2.

$^1\text{H}$  NMR (600 MHz,  $\text{CDCl}_3$ )  $\delta$  6.96 – 6.94 (m, 1H), 6.88 (s, 1H), 5.10 (dq,  $J = 13.4, 6.7$  Hz, 1H), 3.92 (d,  $J = 44.0$  Hz, 3H), 3.74 (s, 3H), 2.20 (dd,  $J = 177.8, 85.5$  Hz, 2H), 1.33 – 1.31 (m, 6H).

$^{19}\text{F}$  NMR (565 MHz,  $\text{CDCl}_3$ )  $\delta$  -157.03 (d,  $J = 20.2$  Hz, 2F), -160.31 (dd,  $J = 24.6, 10.7$  Hz, 2F).

$^{13}\text{C}$  NMR (151 MHz,  $\text{CDCl}_3$ )  $\delta$  149.0 – 148.6 (m), 147.5 – 147.1 (m), 141.6 – 141.2 (m), 139.9 – 139.6 (m), 134.7 – 134.4 (m), 121.2, 115.2, 62.1, 49.8, 35.7, 22.9.

$^{11}\text{B}$  NMR (193 MHz,  $\text{CDCl}_3$ )  $\delta$  -32.44 (t,  $J = 90.7$  Hz).

$^{11}\text{B}\{^1\text{H}\}$  NMR (193 MHz,  $\text{CDCl}_3$ )  $\delta$  -32.44.

$^1\text{H}\{^{11}\text{B}\}$  NMR (600 MHz,  $\text{CDCl}_3$ )  $\delta$  6.95 (s, 1H), 6.88 (s, 1H), 5.10 (dq,  $J = 13.3, 6.7$  Hz, 1H), 3.92 (d,  $J = 44.0$  Hz, 3H), 3.74 (s, 3H), 2.20 (s, 2H), 1.34 – 1.31 (m, 6H).

HRMS (ESI-TOF)  $m/z$ :  $[\text{M} + \text{Na}]^+$  cacl. for  $\text{C}_{14}\text{H}_{17}\text{BF}_4\text{N}_2\text{NaO}^+$  339.1262; found: 339.1253.

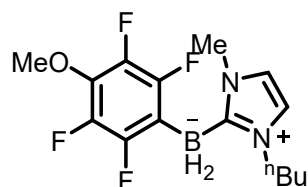

(3-butyl-1-methyl-1H-imidazol-3-ium-2-yl)(2,3,5,6-tetrafluoro-4-methoxyphenyl) dihydroborate (**3y**): Colorless liquid (52 mg, 79% yield); Gradient eluent: EtOAc/petroleum ether: 1/4 to 1/2.

$^1\text{H}$  NMR (600 MHz,  $\text{CDCl}_3$ )  $\delta$  6.87 (s, 1H), 6.85 (s, 1H), 4.10 (t,  $J = 7.6$  Hz, 2H), 3.92 (d,  $J = 42.8$  Hz, 3H), 3.73 (s, 3H), 2.19 (dd,  $J = 177.6, 84.9$  Hz, 2H), 1.68 – 1.61 (m, 2H), 1.30 (dt,  $J = 14.6, 7.5$  Hz, 2H), 0.90 (t,  $J = 7.4$  Hz, 3H).

$^{19}\text{F}$  NMR (565 MHz,  $\text{CDCl}_3$ )  $\delta$  -134.37 – -134.57 (m, 2F) -160.32 (dd,  $J = 24.6, 10.8$  Hz, 2F).

$^{13}\text{C}$  NMR (151 MHz,  $\text{CDCl}_3$ )  $\delta$  149.0 – 148.7 (m), 147.5 – 147.1 (m), 141.5 – 141.2 (m), 139.9 – 139.6 (m), 134.8 – 134.5 (m), 120.7, 119.2, 62.1, 48.5, 35.9, 32.4, 19.7,

13.6.

$^{11}\text{B}$  NMR (193 MHz,  $\text{CDCl}_3$ )  $\delta$  -32.44 (t,  $J$  = 88.8 Hz).

$^{11}\text{B}\{^1\text{H}\}$  NMR (193 MHz,  $\text{CDCl}_3$ )  $\delta$  -32.45.

$^1\text{H}\{^{11}\text{B}\}$  NMR (600 MHz,  $\text{CDCl}_3$ )  $\delta$  6.86 (d,  $J$  = 10.0 Hz, 2H), 4.10 (t,  $J$  = 7.6 Hz, 2H), 3.92 (d,  $J$  = 42.9 Hz, 3H), 3.73 (s, 3H), 2.19 (s, 2H), 1.68 – 1.61 (m, 2H), 1.30 (dt,  $J$  = 14.8, 7.4 Hz, 2H), 0.90 (t,  $J$  = 7.4 Hz, 3H).

HRMS (ESI-TOF)  $m/z$ :  $[\text{M} + \text{Na}]^+$  cacl. for  $\text{C}_{15}\text{H}_{19}\text{BF}_4\text{N}_2\text{NaO}^+$  353.1419; found: 353.1415.

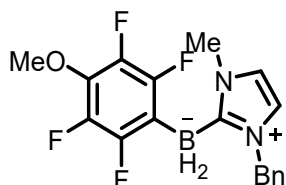

(3-benzyl-1-methyl-1H-imidazol-3-ium-2-yl)(2,3,5,6-tetrafluoro-4-methoxyphenyl)dihydroborate (**3z**): Colorless liquid (58 mg, 80% yield); Gradient eluent: EtOAc/petroleum ether: 1/4 to 1/2.

$^1\text{H}$  NMR (600 MHz,  $\text{CDCl}_3$ )  $\delta$  7.30 (q,  $J$  = 6.4 Hz, 3H), 7.14 – 7.10 (m, 2H), 6.86 (s, 1H), 6.75 (d,  $J$  = 1.8 Hz, 1H), 5.33 (s, 2H), 3.90 (d,  $J$  = 50.6 Hz, 3H), 3.80 (s, 3H), 2.31 (dd,  $J$  = 177.6, 85.7 Hz, 2H).

$^{19}\text{F}$  NMR (565 MHz,  $\text{CDCl}_3$ )  $\delta$  -133.62 (d,  $J$  = 25.4 Hz, 2F), -160.23 (dd,  $J$  = 24.7, 10.7 Hz, 2F).

$^{13}\text{C}$  NMR (151 MHz,  $\text{CDCl}_3$ )  $\delta$  149.0 – 148.6 (m), 147.6 – 147.2 (m), 141.7 – 141.2 (m), 139.8 – 139.6 (m), 135.4, 134.8 – 134.5 (m), 128.6, 128.3, 127.6, 121.1, 119.3, 62.1, 52.1, 36.1.

$^{11}\text{B}$  NMR (193 MHz,  $\text{CDCl}_3$ )  $\delta$  -32.28 (t,  $J$  = 88.8 Hz).

$^{11}\text{B}\{^1\text{H}\}$  NMR (193 MHz,  $\text{CDCl}_3$ )  $\delta$  -32.29.

$^1\text{H}\{^{11}\text{B}\}$  NMR (600 MHz,  $\text{CDCl}_3$ )  $\delta$  7.32 – 7.27 (m, 3H), 7.13 (d,  $J$  = 4.7 Hz, 2H), 6.86 (s, 1H), 6.75 (s, 1H), 5.33 (s, 2H), 3.90 (d,  $J$  = 50.6 Hz, 3H), 3.80 (s, 3H), 2.32 (s, 2H).

HRMS (ESI-TOF)  $m/z$ :  $[\text{M} + \text{Na}]^+$  cacl. for  $\text{C}_{18}\text{H}_{17}\text{BF}_4\text{N}_2\text{NaO}^+$  387.1262; found: 387.1252.

## 8. Characterization data of starting materials and boryl sulfides.

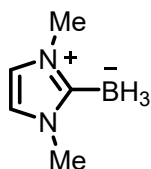

(1,3-dimethyl-1H-imidazol-3-ium-2-yl)trihydroborate (**2a**): white solid (5.3 g, 47% yield).

$^1\text{H}$  NMR (600 MHz,  $\text{CDCl}_3$ )  $\delta$  6.79 (s, 2H), 3.71 (s, 6H), 0.99 (dd,  $J$  = 172.7, 86.3 Hz, 3H).

$^{13}\text{C}$  NMR (151 MHz,  $\text{CDCl}_3$ )  $\delta$  112.0, 35.9.

$^{11}\text{B}$  NMR (193 MHz,  $\text{CDCl}_3$ )  $\delta$  -37.49 (q,  $J$  = 86.9 Hz).

$^{11}\text{B}\{^1\text{H}\}$  NMR (193 MHz,  $\text{CDCl}_3$ )  $\delta$  -37.48.

$^1\text{H}\{^{11}\text{B}\}$  NMR (600 MHz,  $\text{CDCl}_3$ )  $\delta$  6.79 (s, 2H), 3.71 (s, 6H), 0.99 (dd,  $J$  = 55.1, 27.9 Hz, 3H).

Characterization agrees with previous reports for this compound.<sup>1</sup>

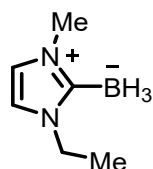

(1-ethyl-3-methyl-1H-imidazol-3-ium-2-yl)trihydroborate (**2b**): white solid (0.35 g, 28% yield); Gradient eluent: EtOAc/petroleum ether: 1/5 to 1/4.

$^1\text{H}$  NMR (600 MHz,  $\text{CDCl}_3$ )  $\delta$  6.82 (d,  $J$  = 1.9 Hz, 1H), 6.80 (d,  $J$  = 1.9 Hz, 1H), 4.14 (q,  $J$  = 7.3 Hz, 2H), 3.70 (s, 3H), 1.36 (t,  $J$  = 7.3 Hz, 3H), 1.00 (dd,  $J$  = 172.6, 86.2 Hz, 3H).

$^{13}\text{C}$  NMR (151 MHz,  $\text{CDCl}_3$ )  $\delta$  120.2, 118.1, 43.7, 35.8, 15.4.

$^{11}\text{B}$  NMR (193 MHz,  $\text{CDCl}_3$ )  $\delta$  -37.48 (q,  $J$  = 83.6 Hz).

$^{11}\text{B}\{^1\text{H}\}$  NMR (193 MHz,  $\text{CDCl}_3$ )  $\delta$  -37.48.

$^1\text{H}\{^{11}\text{B}\}$  NMR (600 MHz,  $\text{CDCl}_3$ )  $\delta$  6.82 (d,  $J$  = 1.9 Hz, 1H), 6.80 (d,  $J$  = 1.9 Hz, 1H), 4.14 (q,  $J$  = 7.3 Hz, 2H), 3.70 (s, 3H), 1.36 (t,  $J$  = 7.3 Hz, 3H), 1.17 – 0.82 (m, 3H).

Characterization agrees with previous reports for this compound.<sup>1</sup>

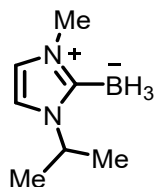

(1-isopropyl-3-methyl-1H-imidazol-3-ium-2-yl)trihydroborate (**2c**): white solid (0.35 g, 28% yield); Gradient eluent: EtOAc/petroleum ether: 1/5 to 1/4.

$^1\text{H}$  NMR (600 MHz,  $\text{CDCl}_3$ )  $\delta$  6.88 (d,  $J$  = 2.0 Hz, 1H), 6.81 (d,  $J$  = 2.0 Hz, 1H), 5.05 (dt,  $J$  = 13.5, 6.8 Hz, 1H), 3.72 (s, 3H), 1.37 (d,  $J$  = 6.8 Hz, 6H), 1.02 (dd,  $J$  = 172.6, 86.2 Hz, 3H).

$^{13}\text{C}$  NMR (151 MHz,  $\text{CDCl}_3$ )  $\delta$  120.4, 114.6, 49.6, 35.7, 22.7.

$^{11}\text{B}$  NMR (193 MHz,  $\text{CDCl}_3$ )  $\delta$  -37.40 (q,  $J$  = 86.2 Hz).

$^{11}\text{B}\{^1\text{H}\}$  NMR (193 MHz,  $\text{CDCl}_3$ )  $\delta$  -37.40.

$^1\text{H}\{^{11}\text{B}\}$  NMR (600 MHz,  $\text{CDCl}_3$ )  $\delta$  6.88 (d,  $J$  = 2.0 Hz, 1H), 6.81 (d,  $J$  = 2.0 Hz, 1H), 5.04 (dq,  $J$  = 13.5, 6.8 Hz, 1H), 3.71 (s, 3H), 1.37 (d,  $J$  = 6.8 Hz, 6H), 1.18 – 0.85 (m, 3H).

Characterization agrees with previous reports for this compound.<sup>1</sup>

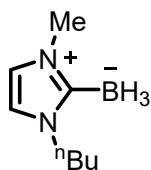

(1-butyl-3-methyl-1H-imidazol-3-ium-2-yl)trihydroborate (**2d**): white solid (0.40 g, 26% yield); Gradient eluent: EtOAc/petroleum ether: 1/5 to 1/4.

$^1\text{H}$  NMR (600 MHz,  $\text{CDCl}_3$ )  $\delta$  6.79 (q,  $J = 1.9$  Hz, 2H), 4.08 – 4.04 (m, 2H), 3.68 (s, 3H), 1.74 – 1.68 (m, 2H), 1.35 – 1.27 (m, 2H), 1.20 – 0.76 (m, 6H).

$^{13}\text{C}$  NMR (151 MHz,  $\text{CDCl}_3$ )  $\delta$  112.0, 118.8, 48.5, 35.8, 32.2, 19.7, 13.6.

$^{11}\text{B}$  NMR (193 MHz,  $\text{CDCl}_3$ )  $\delta$  -37.36 (q,  $J = 86.9$  Hz).

$^{11}\text{B}\{^1\text{H}\}$  NMR (193 MHz,  $\text{CDCl}_3$ )  $\delta$  -37.36.

$^1\text{H}\{^{11}\text{B}\}$  NMR (600 MHz,  $\text{CDCl}_3$ )  $\delta$  6.79 (dd,  $J = 3.8, 1.9$  Hz, 2H), 4.08 – 4.04 (m, 2H), 3.68 (s, 3H), 1.74 – 1.68 (m, 2H), 1.35 – 1.28 (m, 2H), 1.14 – 0.80 (m, 6H).

Characterization agrees with previous reports for this compound.<sup>1</sup>

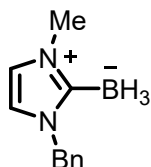

(1-benzyl-3-methyl-1H-imidazol-3-ium-2-yl)trihydroborate (**2e**): white solid (0.66 g, 36% yield); Gradient eluent: EtOAc/petroleum ether: 1/5 to 1/4.

$^1\text{H}$  NMR (600 MHz,  $\text{CDCl}_3$ )  $\delta$  7.32 (dt,  $J = 14.4, 7.6$  Hz, 3H), 7.27 (d,  $J = 7.9$  Hz, 2H), 6.79 (d,  $J = 1.9$  Hz, 1H), 6.71 (d,  $J = 1.9$  Hz, 1H), 5.30 (s, 2H), 3.75 (s, 3H), 1.15 (dd,  $J = 173.1, 86.2$  Hz, 3H).

$^{13}\text{C}$  NMR (151 MHz,  $\text{CDCl}_3$ )  $\delta$  136.0, 128.9, 128.3, 120.5, 118.6, 52.1, 36.0.

$^{11}\text{B}$  NMR (193 MHz,  $\text{CDCl}_3$ )  $\delta$  -37.05 (q,  $J = 86.9$  Hz).

$^{11}\text{B}\{^1\text{H}\}$  NMR (193 MHz,  $\text{CDCl}_3$ )  $\delta$  -37.05.

$^1\text{H}\{^{11}\text{B}\}$  NMR (600 MHz,  $\text{CDCl}_3$ )  $\delta$  7.35 – 7.29 (m, 3H), 7.27 (d,  $J = 7.4$  Hz, 2H), 6.79 (d,  $J = 1.9$  Hz, 1H), 6.71 (d,  $J = 1.9$  Hz, 1H), 5.30 (s, 2H), 3.74 (s, 3H), 1.29 – 1.01 (m, 3H).

Characterization agrees with previous reports for this compound.<sup>1</sup>

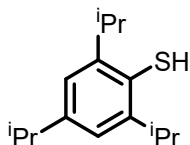

2,4,6-triisopropylbenzenethiol. Colorless liquid (3.8 g, 80% yield).

$^1\text{H}$  NMR (600 MHz,  $\text{CDCl}_3$ )  $\delta$  7.03 (s, 2H), 3.58 – 3.50 (m, 2H), 3.10 (s, 1H), 2.90 (dq,  $J = 13.8, 6.9$  Hz, 1H), 1.29 (dd,  $J = 11.1, 6.9$  Hz, 18H).

$^{13}\text{C}$  NMR (151 MHz,  $\text{CDCl}_3$ )  $\delta$  148.1, 147.1, 124.3, 121.4, 34.2, 31.8, 24.1, 23.3.

Characterization agrees with previous reports for this compound.<sup>2</sup>

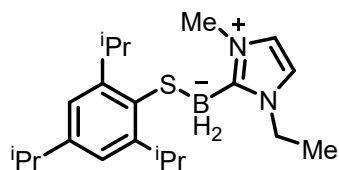

(1-ethyl-3-methyl-1H-imidazol-3-ium-2-yl)((2,4,6-triisopropylphenyl)thio) dihydroborate (**4a**): white solid (50 mg, 28% yield); Gradient eluent: EtOAc/petroleum ether: 1/4 to 1/2.

$^1\text{H NMR}$  (600 MHz,  $\text{CDCl}_3$ )  $\delta$  6.83 (s, 2H), 6.79 (d,  $J = 1.8$  Hz, 1H), 6.74 (d,  $J = 1.7$  Hz, 1H), 3.91 – 3.82 (m, 4H), 3.38 (s, 3H), 2.81 (dt,  $J = 13.8, 6.9$  Hz, 1H), 2.38 (d,  $J = 131.1$  Hz, 2H), 1.20 (d,  $J = 6.9$  Hz, 6H), 1.15 (t,  $J = 7.3$  Hz, 3H), 1.08 (d,  $J = 7.0$  Hz, 12H).

$^{13}\text{C NMR}$  (151 MHz,  $\text{CDCl}_3$ )  $\delta$  152.2, 146.0, 135.2, 120.9, 120.5, 118.4, 43.4, 35.3, 34.2, 31.2, 24.2, 24.2, 15.2.

$^{11}\text{B NMR}$  (193 MHz,  $\text{CDCl}_3$ )  $\delta$  -23.23 (t,  $J = 99.4$  Hz).

$^{11}\text{B}\{^1\text{H}\}$  NMR (193 MHz,  $\text{CDCl}_3$ )  $\delta$  -23.25.

$^1\text{H}\{^{11}\text{B}\}$  NMR (600 MHz,  $\text{CDCl}_3$ )  $\delta$  6.83 (s, 2H), 6.79 (d,  $J = 1.6$  Hz, 1H), 6.74 (d,  $J = 1.6$  Hz, 1H), 3.90 – 3.84 (m, 4H), 3.38 (s, 3H), 2.81 (dt,  $J = 13.8, 6.9$  Hz, 1H), 2.38 (s, 2H), 1.20 (d,  $J = 6.9$  Hz, 6H), 1.15 (t,  $J = 7.3$  Hz, 3H), 1.08 (d,  $J = 7.0$  Hz, 12H).

HRMS (ESI-TOF)  $m/z$ :  $[\text{M} + \text{Na}]^+$  cacl'd. for  $\text{C}_{21}\text{H}_{35}\text{BN}_2\text{NaS}^+$  381.2506; found: 381.2477.

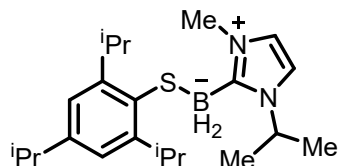

(1-isopropyl-3-methyl-1H-imidazol-3-ium-2-yl)((2,4,6-triisopropylphenyl)thio) dihydroborate (**4b**): white solid (80 mg, 43% yield); Gradient eluent: EtOAc/petroleum ether: 1/4 to 1/2.

$^1\text{H NMR}$  (600 MHz,  $\text{CDCl}_3$ )  $\delta$  6.83 (d,  $J = 4.0$  Hz, 3H), 6.77 (d,  $J = 1.7$  Hz, 1H), 4.71 (dt,  $J = 13.5, 6.7$  Hz, 1H), 3.89 (dt,  $J = 13.8, 6.9$  Hz, 2H), 3.41 (s, 3H), 2.80 (dt,  $J = 13.8, 6.9$  Hz, 1H), 2.42 (d,  $J = 105.0$  Hz, 2H), 1.19 (d,  $J = 7.0$  Hz, 6H), 1.10 (d,  $J = 6.8$  Hz, 6H), 1.06 (d,  $J = 7.1$  Hz, 12H).

$^{13}\text{C NMR}$  (151 MHz,  $\text{CDCl}_3$ )  $\delta$  152.2, 145.9, 135.0, 121.3, 120.6, 115.2, 49.8, 35.2, 34.2, 31.1, 24.2, 24.2, 22.6.

$^{11}\text{B NMR}$  (193 MHz,  $\text{CDCl}_3$ )  $\delta$  -23.35 (t,  $J = 103.3$  Hz).

$^{11}\text{B}\{^1\text{H}\}$  NMR (193 MHz,  $\text{CDCl}_3$ )  $\delta$  -23.17.

$^1\text{H}\{^{11}\text{B}\}$  NMR (600 MHz,  $\text{CDCl}_3$ )  $\delta$  6.83 (s, 3H), 6.77 (s, 1H), 4.71 (dt,  $J = 13.1, 6.4$  Hz, 1H), 3.89 (dt,  $J = 13.7, 6.8$  Hz, 2H), 3.42 (s, 3H), 2.80 (dt,  $J = 13.7, 6.8$  Hz, 1H), 2.42 (s, 2H), 1.19 (d,  $J = 7.0$  Hz, 6H), 1.11 (d,  $J = 6.8$  Hz, 6H), 1.07 (d,  $J = 7.1$  Hz, 12H).

HRMS (ESI-TOF)  $m/z$ :  $[\text{M} + \text{Na}]^+$  cacl'd. for  $\text{C}_{22}\text{H}_{37}\text{BN}_2\text{NaS}^+$  395.2663; found: 395.2658.

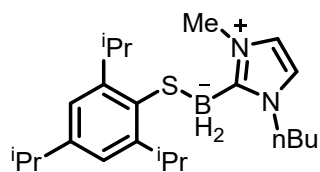

(1-butyl-3-methyl-1H-imidazol-3-ium-2-yl)((2,4,6-triisopropylphenyl)thio) dihydroborate (**4c**): white solid (48 mg, 25% yield); Gradient eluent: EtOAc/petroleum ether: 1/4 to 1/2.

**<sup>1</sup>H NMR (600 MHz, CDCl<sub>3</sub>)** δ 6.84 (s, 2H), 6.75 (dd, *J* = 15.9, 1.7 Hz, 2H), 3.85 (dt, *J* = 13.8, 6.9 Hz, 2H), 3.76 – 3.72 (m, 2H), 3.41 (s, 3H), 2.85 – 2.77 (m, 1H), 2.37 (d, *J* = 144.5 Hz, 2H), 1.57 (dd, *J* = 9.4, 5.8 Hz, 2H), 1.25 (dd, *J* = 14.9, 7.4 Hz, 2H), 1.21 (d, *J* = 6.9 Hz, 6H), 1.09 (d, *J* = 6.9 Hz, 12H), 0.88 (t, *J* = 7.4 Hz, 3H).

**<sup>13</sup>C NMR (151 MHz, CDCl<sub>3</sub>)** δ 152.2, 146.0, 135.3, 120.6, 120.4, 119.0, 48.2, 35.4, 34.1, 32.1, 31.2, 24.2, 24.2, 19.8, 13.6.

**<sup>11</sup>B NMR (193 MHz, CDCl<sub>3</sub>)** δ -23.18 (t, *J* = 106.4 Hz).

**<sup>11</sup>B{<sup>1</sup>H} NMR (193 MHz, CDCl<sub>3</sub>)** δ -23.06.

**<sup>1</sup>H{<sup>11</sup>B} NMR (600 MHz, CDCl<sub>3</sub>)** δ 6.84 (s, 2H), 6.76 (d, *J* = 1.8 Hz, 1H), 6.74 (d, *J* = 1.7 Hz, 1H), 3.85 (dt, *J* = 13.8, 6.9 Hz, 2H), 3.77 – 3.72 (m, 2H), 3.41 (s, 3H), 2.81 (hept, *J* = 6.8 Hz, 1H), 2.38 (s, 2H), 1.57 (t, *J* = 7.6 Hz, 2H), 1.25 (dd, *J* = 14.9, 7.5 Hz, 2H), 1.21 (d, *J* = 6.9 Hz, 6H), 1.09 (d, *J* = 6.9 Hz, 12H), 0.88 (t, *J* = 7.4 Hz, 3H).

**HRMS (ESI-TOF)** *m/z*: [M + Na]<sup>+</sup> cacl'd. for C<sub>23</sub>H<sub>39</sub>BN<sub>2</sub>NaS<sup>+</sup> 409.2819; found:409.2816.

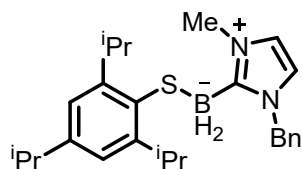

(1-benzyl-3-methyl-1H-imidazol-3-ium-2-yl)((2,4,6-triisopropylphenyl)thio) dihydroborate (**4d**): white solid (67 mg, 32% yield); Gradient eluent: EtOAc/petroleum ether: 1/4 to 1/2.

**<sup>1</sup>H NMR (600 MHz, CDCl<sub>3</sub>)** δ 7.32 (d, *J* = 5.1 Hz, 3H), 7.18 – 7.13 (m, 2H), 6.87 (s, 2H), 6.70 (s, 1H), 6.56 (s, 1H), 4.87 (s, 2H), 3.89 (dt, *J* = 13.8, 6.9 Hz, 2H), 3.43 (s, 3H), 2.84 (dt, *J* = 13.5, 6.8 Hz, 1H), 2.52 (d, *J* = 120.6 Hz, 2H), 1.24 (d, *J* = 6.9 Hz, 6H), 1.09 (d, *J* = 6.9 Hz, 12H).

**<sup>13</sup>C NMR (151 MHz, CDCl<sub>3</sub>)** δ 152.3, 146.2, 135.2, 135.0, 128.9, 128.8, 128.5, 120.8, 120.5, 118.8, 51.8, 35.5, 34.2, 31.3, 24.3, 24.2.

**<sup>11</sup>B NMR (193 MHz, CDCl<sub>3</sub>)** δ -23.13 (t, *J* = 96.5 Hz).

**<sup>11</sup>B{<sup>1</sup>H} NMR (193 MHz, CDCl<sub>3</sub>)** δ -23.17.

**<sup>1</sup>H{<sup>11</sup>B} NMR (600 MHz, CDCl<sub>3</sub>)** δ 7.32 (d, *J* = 5.2 Hz, 3H), 7.17 – 7.14 (m, 2H), 6.87 (s, 2H), 6.70 (s, 1H), 6.56 (s, 1H), 4.88 (s, 2H), 3.89 (dt, *J* = 13.7, 6.8 Hz, 2H), 3.43 (s, 3H), 2.84 (dt, *J* = 13.5, 6.8 Hz, 1H), 2.51 (s, 2H), 1.23 (d, *J* = 6.9 Hz, 6H), 1.09 (d, *J* = 6.9 Hz, 12H).

**HRMS (ESI-TOF)**  $m/z$ :  $[M + Na]^+$  cacl. for  $C_{26}H_{37}BN_2NaS^+$  443.2663; found: 443.2653.

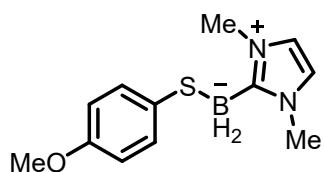

(1,3-dimethyl-1H-imidazol-3-ium-2-yl)((4-methoxyphenyl)thio)dihydroborate (**4e**): Colorless liquid (37 mg, 30% yield); Gradient eluent: EtOAc/petroleum ether: 1/4 to 1/2.

$^1H$  NMR (600 MHz,  $CDCl_3$ )  $\delta$  7.22 (d,  $J = 8.7$  Hz, 2H), 6.80 (s, 2H), 6.67 (d,  $J = 8.7$  Hz, 2H), 3.74 (s, 3H), 3.66 (s, 6H), 2.57 (dd,  $J = 199.3, 84.0$  Hz, 2H).

$^{13}C$  NMR (151 MHz,  $CDCl_3$ )  $\delta$  156.9, 133.2, 133.1, 120.7, 113.8, 55.3, 36.1.

$^{11}B$  NMR (193 MHz,  $CDCl_3$ )  $\delta$  -23.70 (d,  $J = 107.1$  Hz).

$^{11}B\{^1H\}$  NMR (193 MHz,  $CDCl_3$ )  $\delta$  -23.70

$^1H\{^{11}B\}$  NMR (600 MHz,  $CDCl_3$ )  $\delta$  7.22 (d,  $J = 8.6$  Hz, 2H), 6.79 (s, 2H), 6.67 (d,  $J = 8.6$  Hz, 2H), 3.73 (s, 3H), 3.65 (s, 6H), 2.57 (s, 2H).

**HRMS (ESI-TOF)**  $m/z$ :  $[M + Na]^+$  cacl. for  $C_{12}H_{17}BN_2NaOS^+$  271.1047; found: 271.1053.

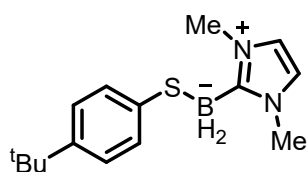

((4-(tert-butyl)phenyl)thio)(1,3-dimethyl-1H-imidazol-3-ium-2-yl)dihydroborate (**4f**): Colorless liquid (33 mg, 24% yield); Gradient eluent: EtOAc/petroleum ether: 1/4 to 1/2.

$^1H$  NMR (600 MHz,  $CDCl_3$ )  $\delta$  7.27 (d,  $J = 8.1$  Hz, 2H), 7.13 (d,  $J = 8.3$  Hz, 2H), 6.81 (s, 2H), 3.71 (s, 6H), 2.60 (dd,  $J = 194.8, 82.2$  Hz, 2H), 1.26 (s, 9H).

$^{13}C$  NMR (151 MHz,  $CDCl_3$ )  $\delta$  146.4, 139.0, 130.8, 125.0, 120.8, 36.1, 34.2, 31.4.

$^{11}B$  NMR (193 MHz,  $CDCl_3$ )  $\delta$  -24.28 (t,  $J = 100.4$  Hz).

$^{11}B\{^1H\}$  NMR (193 MHz,  $CDCl_3$ )  $\delta$  -24.33.

$^1H\{^{11}B\}$  NMR (600 MHz,  $CDCl_3$ )  $\delta$  7.27 (d,  $J = 8.0$  Hz, 2H), 7.13 (d,  $J = 8.3$  Hz, 2H), 6.81 (s, 2H), 3.71 (s, 6H), 2.60 (s, 2H), 1.26 (s, 9H).

**HRMS (ESI-TOF)**  $m/z$ :  $[M + Na]^+$  cacl. for  $C_{15}H_{23}BN_2NaS^+$  297.1567; found: 297.1565.

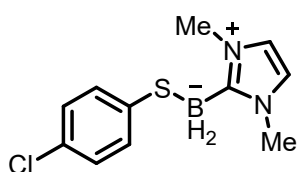



((4-chlorophenyl)thio)(1,3-dimethyl-1H-imidazol-3-ium-2-yl)dihydroborate (**4g**): Colorless liquid (25 mg, 20% yield); Gradient eluent: EtOAc/petroleum ether: 1/4 to 1/2.

$^1\text{H NMR}$  (600 MHz,  $\text{CDCl}_3$ )  $\delta$  7.30 (d,  $J = 8.3$  Hz, 2H), 7.07 (d,  $J = 8.3$  Hz, 2H), 6.84 (s, 2H), 3.75 (s, 6H), 2.57 (dd,  $J = 146.0, 50.6$  Hz, 2H).

$^{13}\text{C NMR}$  (151 MHz,  $\text{CDCl}_3$ )  $\delta$  141.5, 132.1, 128.9, 127.9, 120.9, 36.2.

$^{11}\text{B NMR}$  (193 MHz,  $\text{CDCl}_3$ )  $\delta$  -24.39 (t,  $J = 103.3$  Hz).

$^{11}\text{B}\{^1\text{H}\}$  NMR (193 MHz,  $\text{CDCl}_3$ )  $\delta$  -24.40.

$^1\text{H}\{^{11}\text{B}\}$  NMR (600 MHz,  $\text{CDCl}_3$ )  $\delta$  7.30 (d,  $J = 8.3$  Hz, 2H), 7.07 (d,  $J = 8.3$  Hz, 2H), 6.84 (s, 2H), 3.75 (s, 6H), 2.60 (s, 2H).

HRMS (ESI-TOF)  $m/z$ :  $[\text{M} + \text{Na}]^+$  cacl. for  $\text{C}_{11}\text{H}_{14}\text{BClN}_2\text{NaS}^+$  275.0551; found: 275.0557.

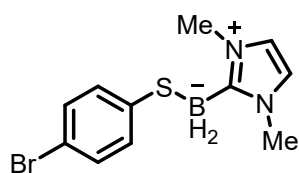

((4-bromophenyl)thio)(1,3-dimethyl-1H-imidazol-3-ium-2-yl)dihydroborate (**4h**): Colorless liquid (30 mg, 18% yield); Gradient eluent: EtOAc/petroleum ether: 1/4 to 1/2.

$^1\text{H NMR}$  (600 MHz,  $\text{CDCl}_3$ )  $\delta$  7.24 (d,  $J = 6.0$  Hz, 2H), 7.21 (d,  $J = 8.4$  Hz, 2H), 6.84 (s, 2H), 3.76 (s, 6H), 2.58 (dd,  $J = 153.6, 48.4$  Hz, 2H).

$^{13}\text{C NMR}$  (151 MHz,  $\text{CDCl}_3$ )  $\delta$  142.3, 132.4, 130.8, 121.0, 116.7, 36.2.

$^{11}\text{B NMR}$  (193 MHz,  $\text{CDCl}_3$ )  $\delta$  -24.47 (d,  $J = 100.4$  Hz).

$^{11}\text{B}\{^1\text{H}\}$  NMR (193 MHz,  $\text{CDCl}_3$ )  $\delta$  -24.47.

$^1\text{H}\{^{11}\text{B}\}$  NMR (600 MHz,  $\text{CDCl}_3$ )  $\delta$  7.24 (d,  $J = 6.0$  Hz, 2H), 7.21 (d,  $J = 8.5$  Hz, 2H), 6.84 (s, 2H), 3.76 (s, 6H), 2.60 (s, 2H).

HRMS (ESI-TOF)  $m/z$ :  $[\text{M} + \text{Na}]^+$  cacl. for  $\text{C}_{11}\text{H}_{14}\text{BBBrN}_2\text{NaS}^+$  319.0046; found: 319.0042.

## 9. The crystallographic data

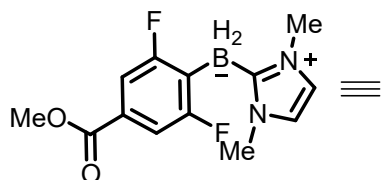

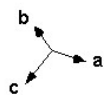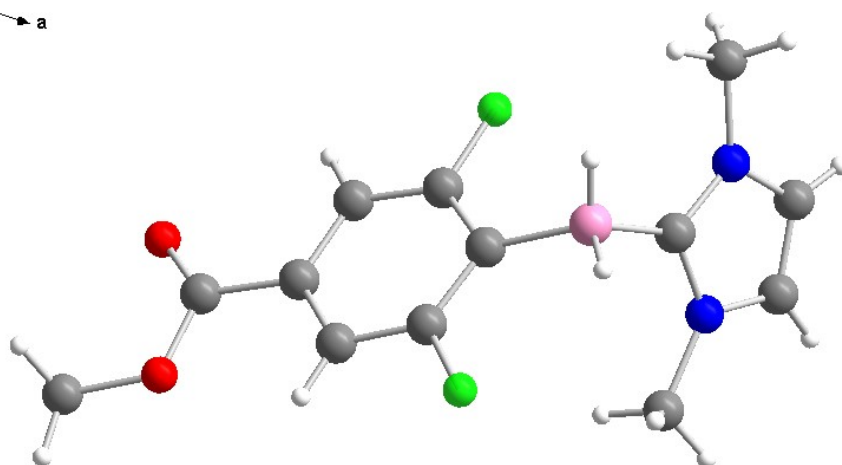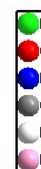

Table S1

|                                      |                                                                               |
|--------------------------------------|-------------------------------------------------------------------------------|
| CCDC Number                          | 2286018                                                                       |
| Empirical formula                    | C <sub>13</sub> H <sub>15</sub> BF <sub>2</sub> N <sub>2</sub> O <sub>2</sub> |
| Formula weight                       | 280.08                                                                        |
| Temperature/K                        | 293(2)                                                                        |
| Crystal system                       | monoclinic                                                                    |
| Space group                          | P2 <sub>1</sub> /c                                                            |
| a/Å                                  | 12.3113(4)                                                                    |
| b/Å                                  | 7.3110(3)                                                                     |
| c/Å                                  | 15.6195(5)                                                                    |
| α/°                                  | 90                                                                            |
| β/°                                  | 97.042(3)                                                                     |
| γ/°                                  | 90                                                                            |
| Volume/Å <sup>3</sup>                | 1395.27(9)                                                                    |
| Z                                    | 4                                                                             |
| ρ <sub>calc</sub> /g/cm <sup>3</sup> | 1.333                                                                         |
| μ/mm <sup>-1</sup>                   | 0.909                                                                         |
| F(000)                               | 584.0                                                                         |
| Crystal size/mm <sup>3</sup>         | 0.01 × 0.01 × 0.01                                                            |
| Radiation                            | Cu Kα (λ = 1.54184)                                                           |
| 2θ range for data collection/°       | 7.234 to 143.024                                                              |
| Index ranges                         | -13 ≤ h ≤ 15, -8 ≤ k ≤ 8, -19 ≤ l ≤ 15                                        |
| Reflections collected                | 5541                                                                          |
| Independent reflections              | 2637 [R <sub>int</sub> = 0.0160, R <sub>sigma</sub> = 0.0220]                 |

Data/restraints/parameters 2637/0/184  
 Goodness-of-fit on F<sup>2</sup> 1.040  
 Final R indexes [I>=2σ (I)] R<sub>1</sub> = 0.0515, wR<sub>2</sub> = 0.1491  
 Final R indexes [all data] R<sub>1</sub> = 0.0641, wR<sub>2</sub> = 0.1600  
 Largest diff. peak/hole / e Å<sup>-3</sup> 0.25/-0.24

---

<sup>[a]</sup>R<sub>1</sub> =  $\sum ||F_o| - |F_c|| / \sum |F_o|$ ; wR<sub>2</sub> =  $\{ \sum [w(F_o^2 - F_c^2)^2] / \sum [w(F_o^2)^2] \}^{1/2}$

Table S2

| Bond Lengths |    |           | Bond Angles |    |    |             |
|--------------|----|-----------|-------------|----|----|-------------|
| C6           | C1 | 1.381 (3) | C6          | C1 | C2 | 111.64 (19) |
| C2           | C1 | 1.389 (3) | C6          | C1 | B7 | 125.3 (2)   |
| C1           | B7 | 1.632 (3) | C2          | C1 | B7 | 123.06 (19) |
| C8           | B7 | 1.596 (3) | C1          | B7 | C8 | 110.93 (17) |

## 10. References:

1. S. Gardner, T. Kawamoto, and D. P. Curran, Synthesis of 1,3-Dialkylimidazol-2-ylidene Boranes from 1,3-Dialkylimidazolium Iodides and Sodium Borohydride, *J. Org. Chem.*, 2015, **80**, 9794-9797.
2. D. C. Miller, J. M. Ganley, A. J. Musacchio, T. C. Sherwood, W. R. Ewing and R. R. Knowles, Anti-Markovnikov Hydroamination of Unactivated Alkenes with Primary Alkyl Amines, *J. Am. Chem. Soc.*, 2019, **141**, 16590-16594.
3. P.-J. Xia, Z.-P. Ye, Y.-Z. Hu, J.-A. Xiao, K. Chen, H.-Y. Xiang, X.-Q. Chen and H. Yang, Photocatalytic C-F Bond Borylation of Polyfluoroarenes with NHC-boranes, *Org. Lett.*, 2020, **22**, 1742-1747.
4. W. Xu, H. Jiang, J. Leng, H.-W. Ong and J. Wu, Visible-Light-Induced Selective Defluoroborylation of Polyfluoroarenes, gem-Difluoroalkenes, and Trifluoromethylalkenes, *Angew. Chem., Int. Ed.*, 2020, **59**, 4009-4016.

## 11. NMR Spectra

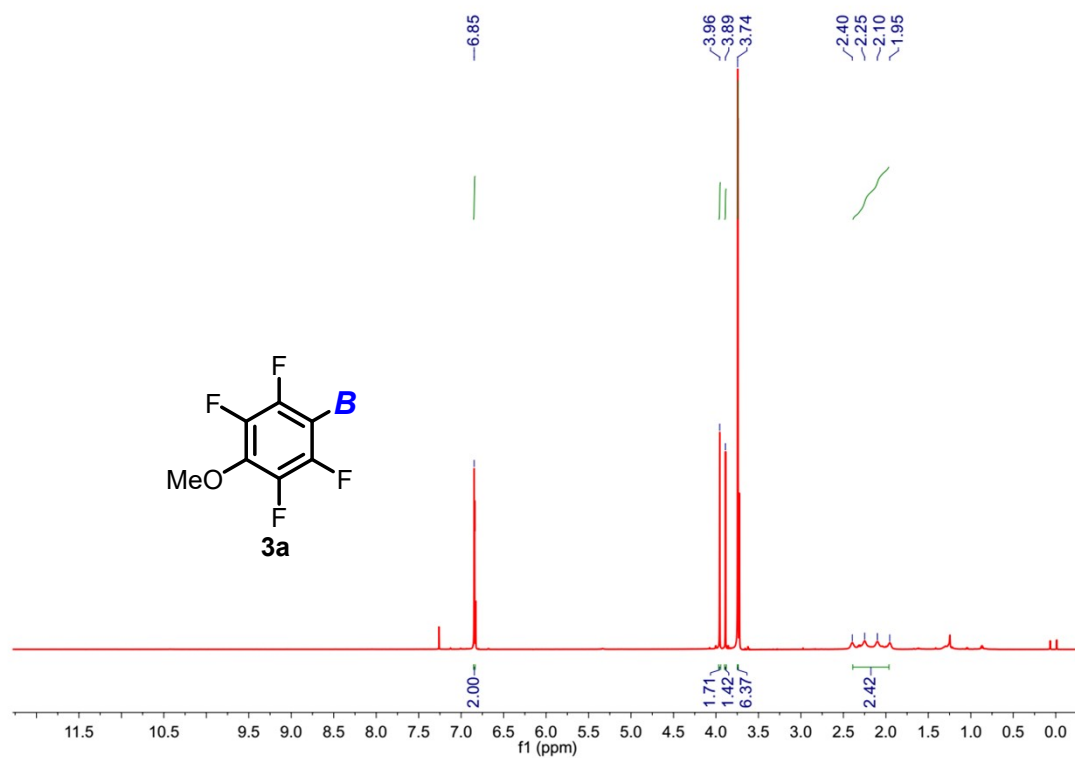

<sup>1</sup>H NMR (600 MHz, CDCl<sub>3</sub>)

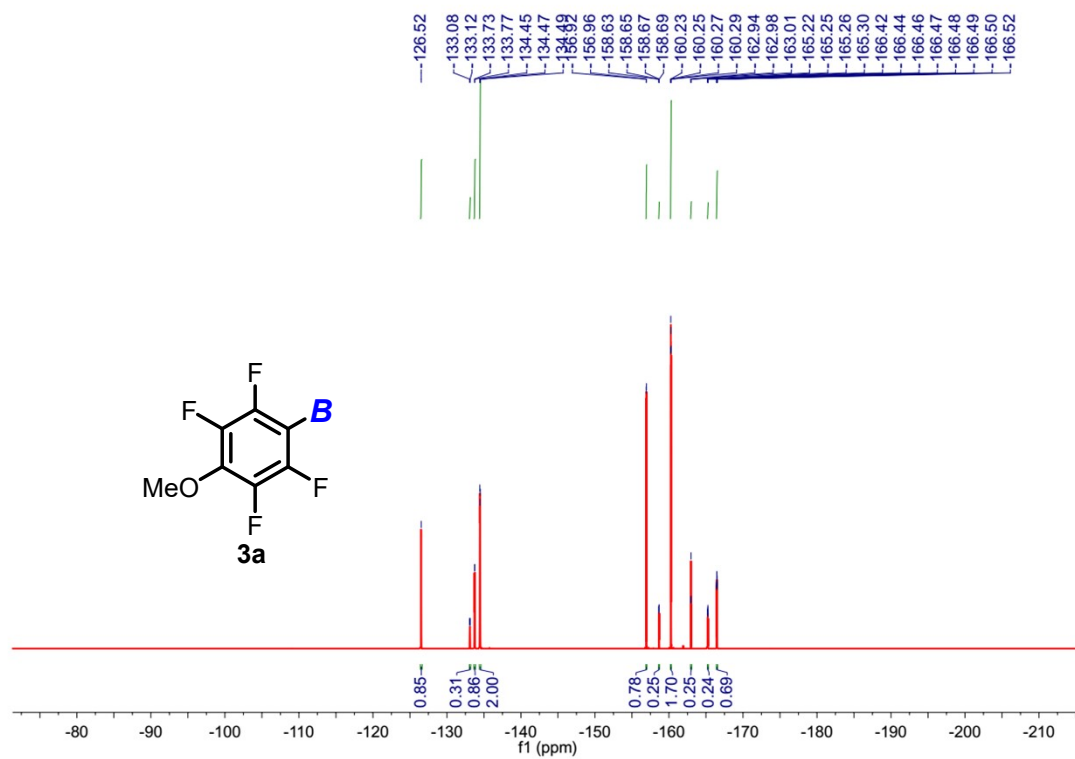

<sup>19</sup>F NMR (565 MHz, CDCl<sub>3</sub>)

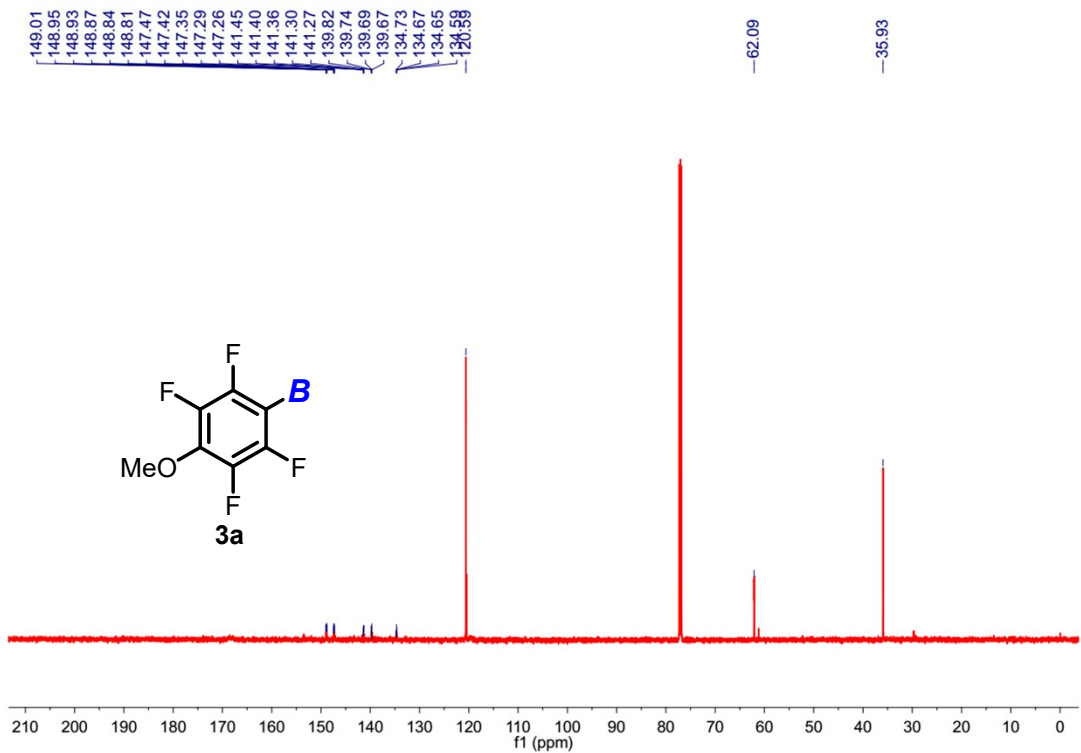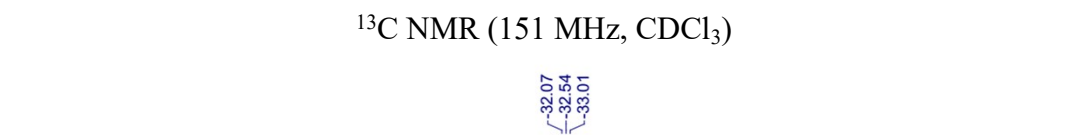

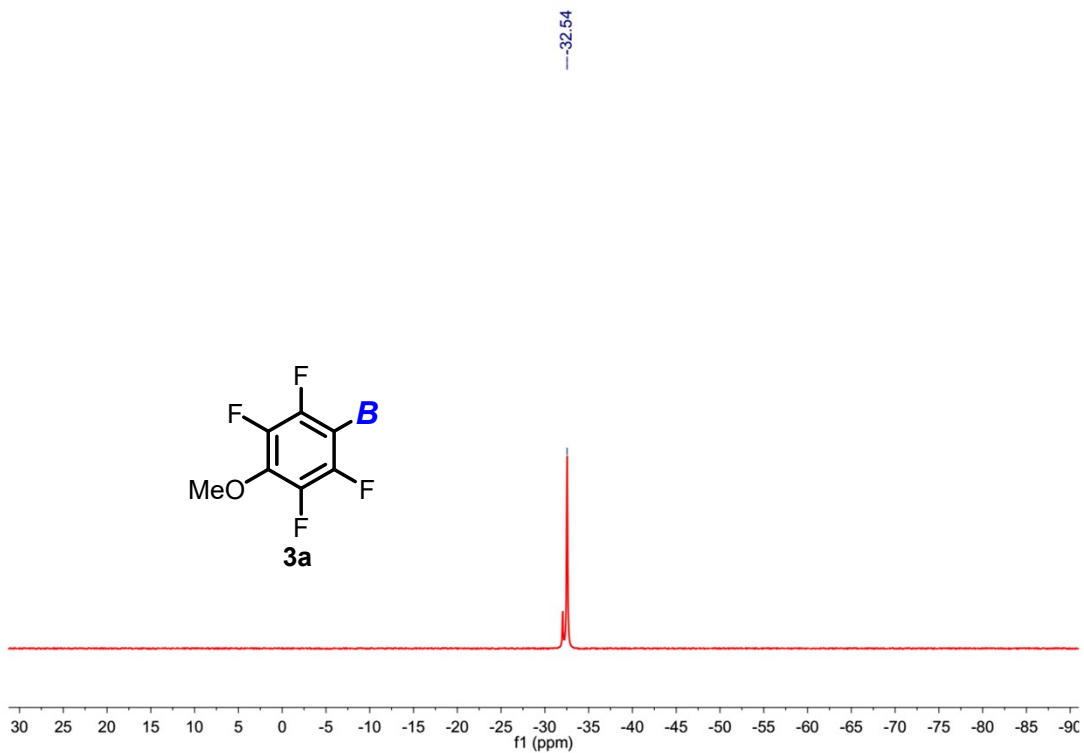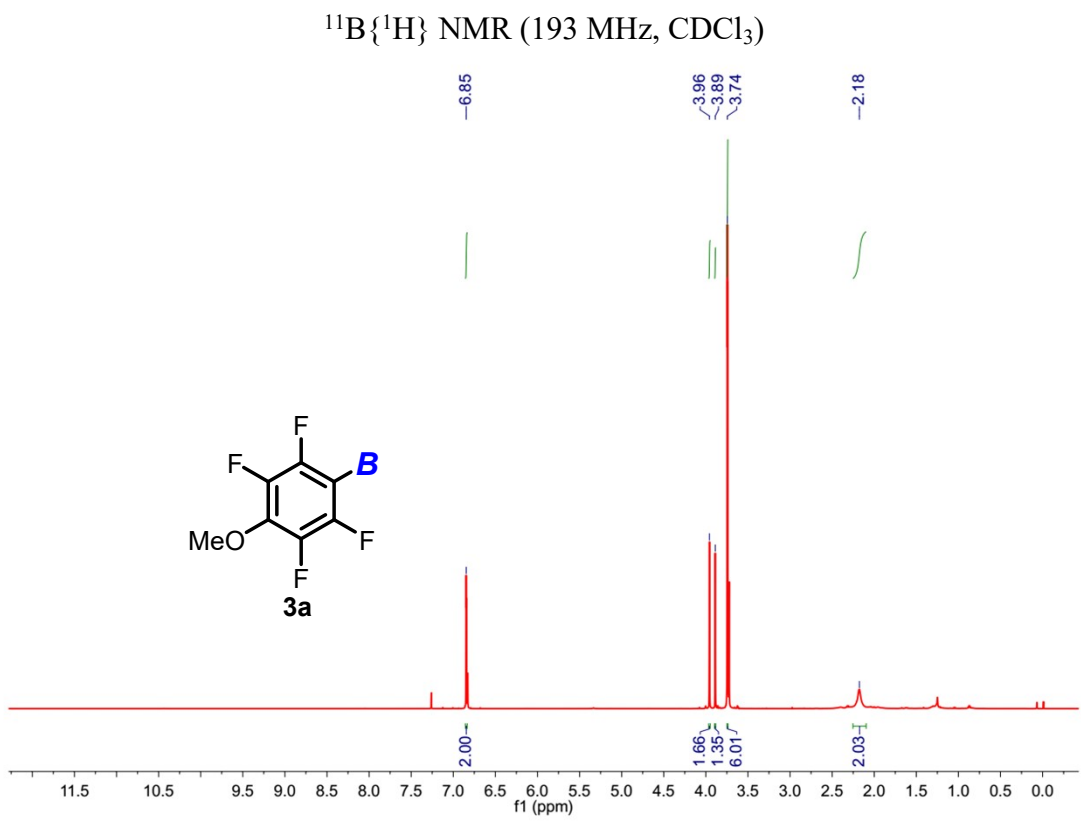

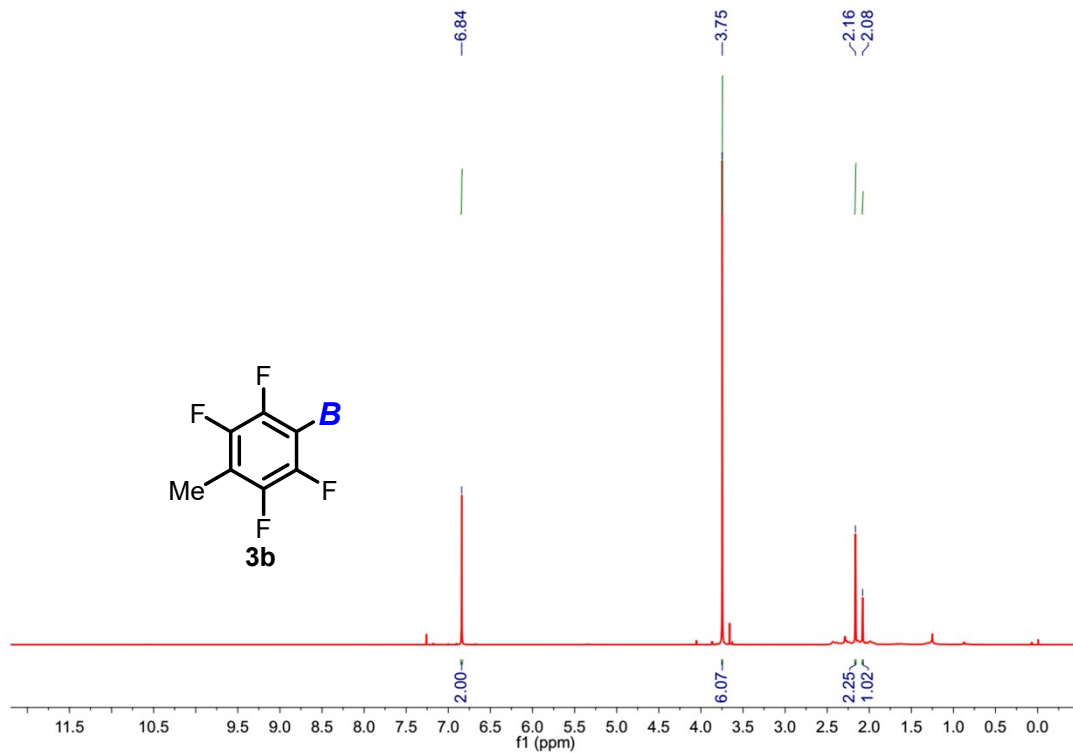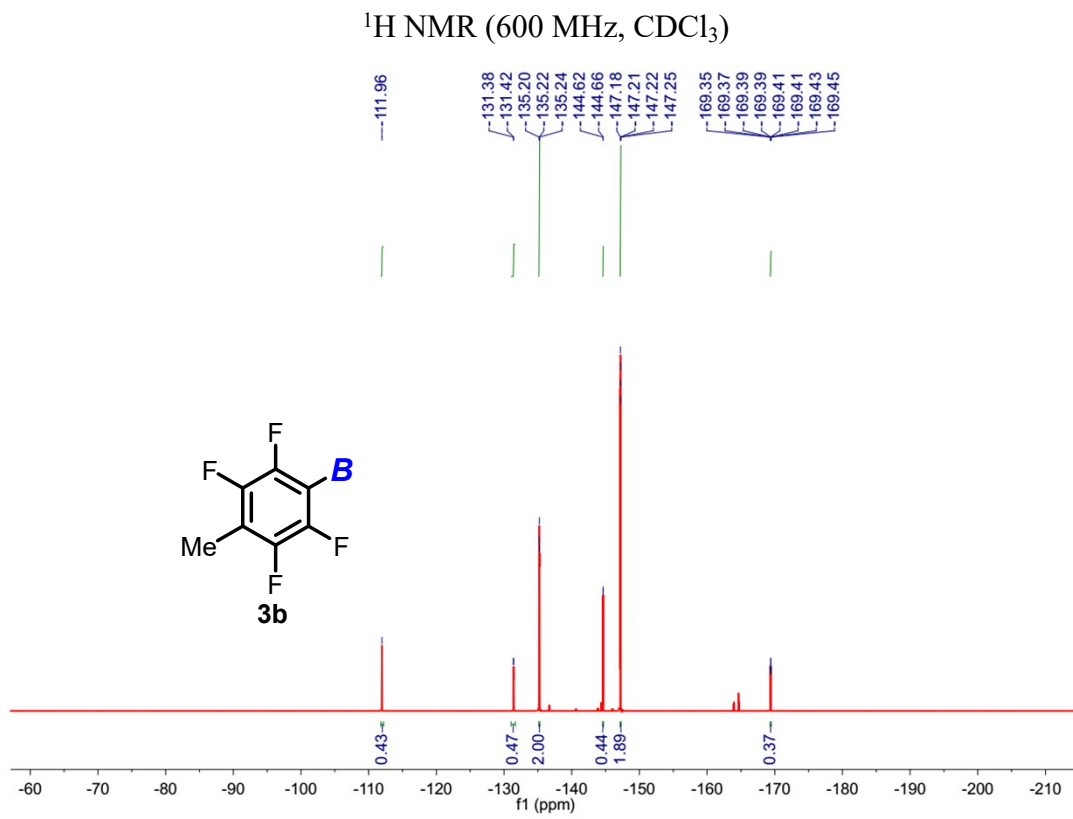



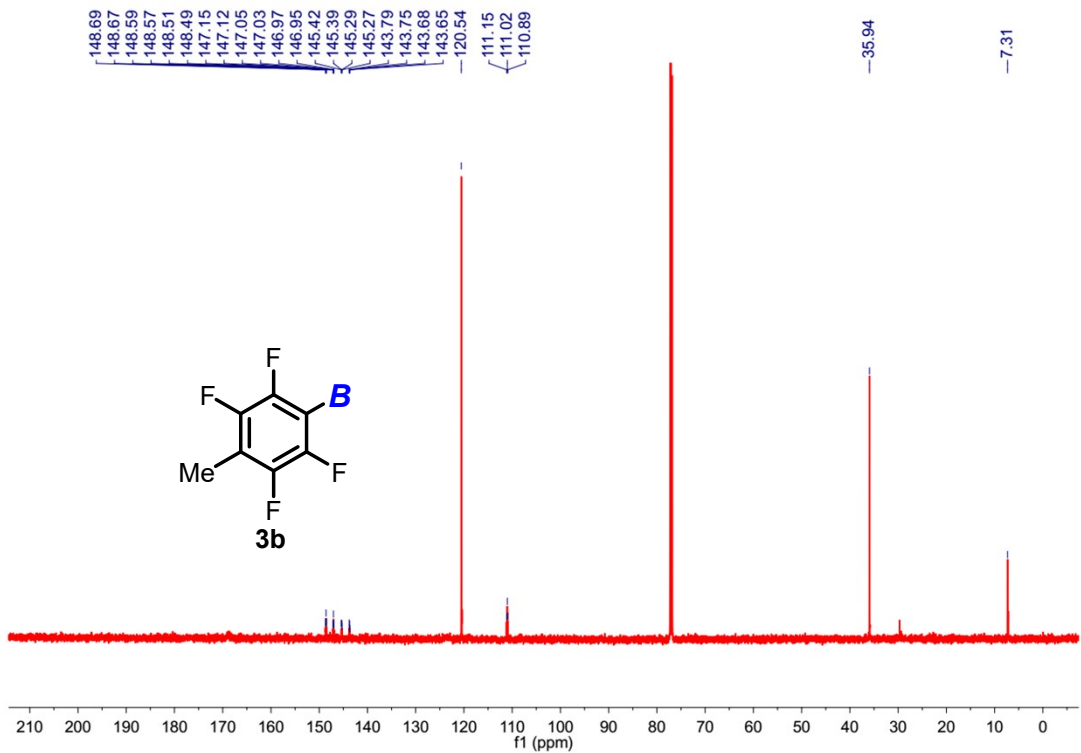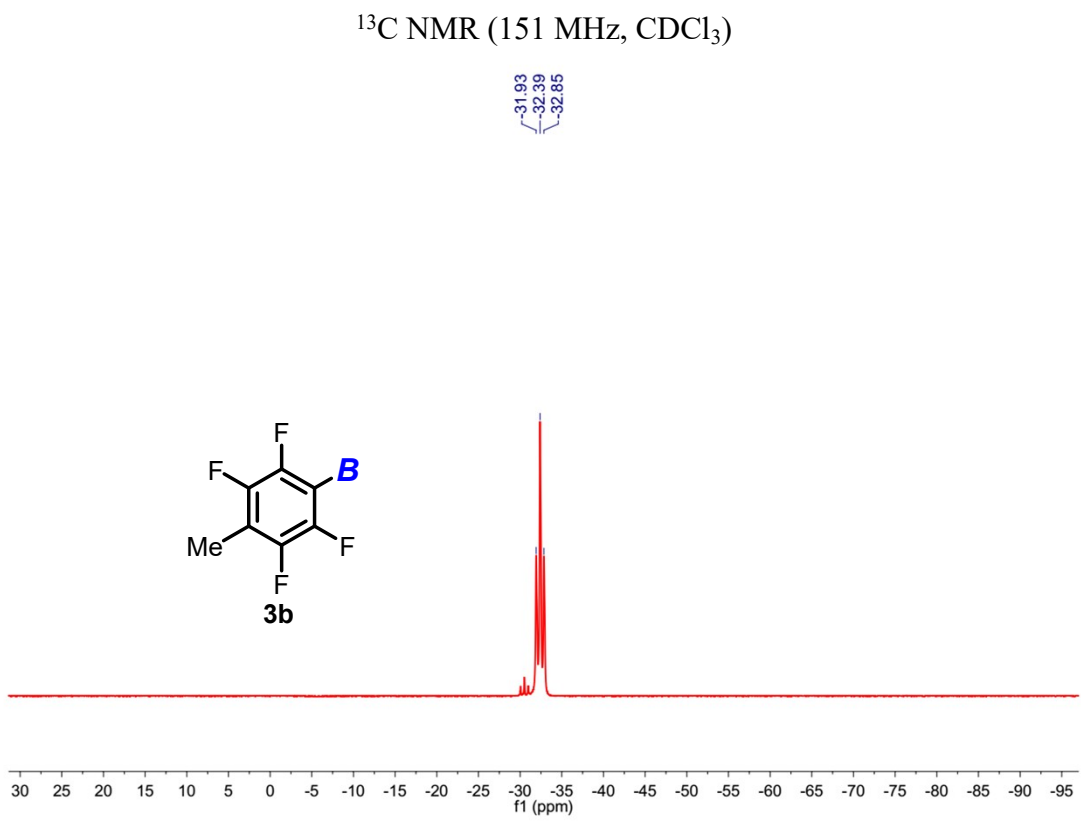

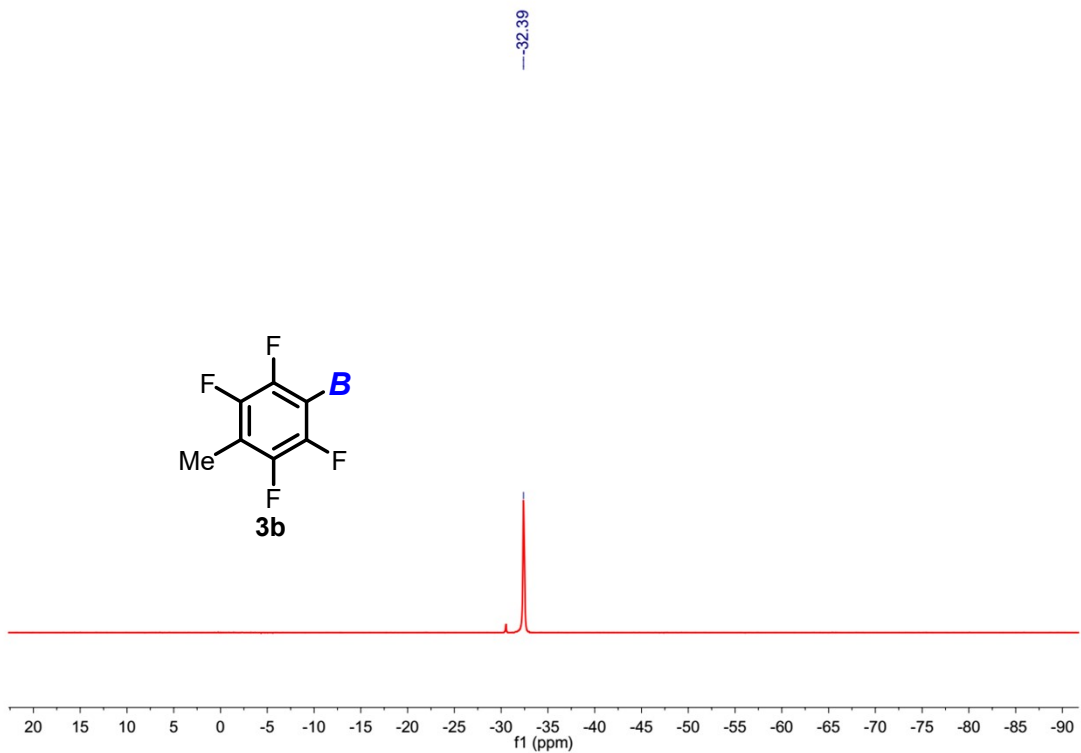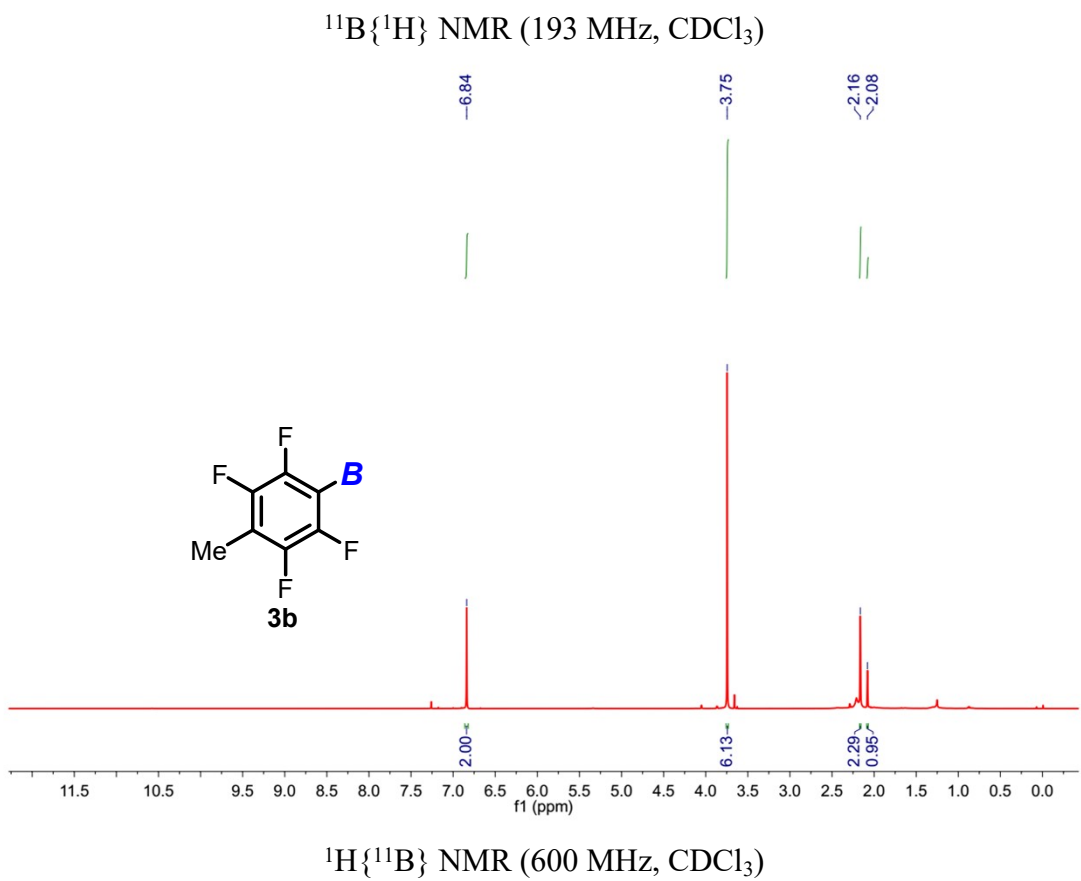

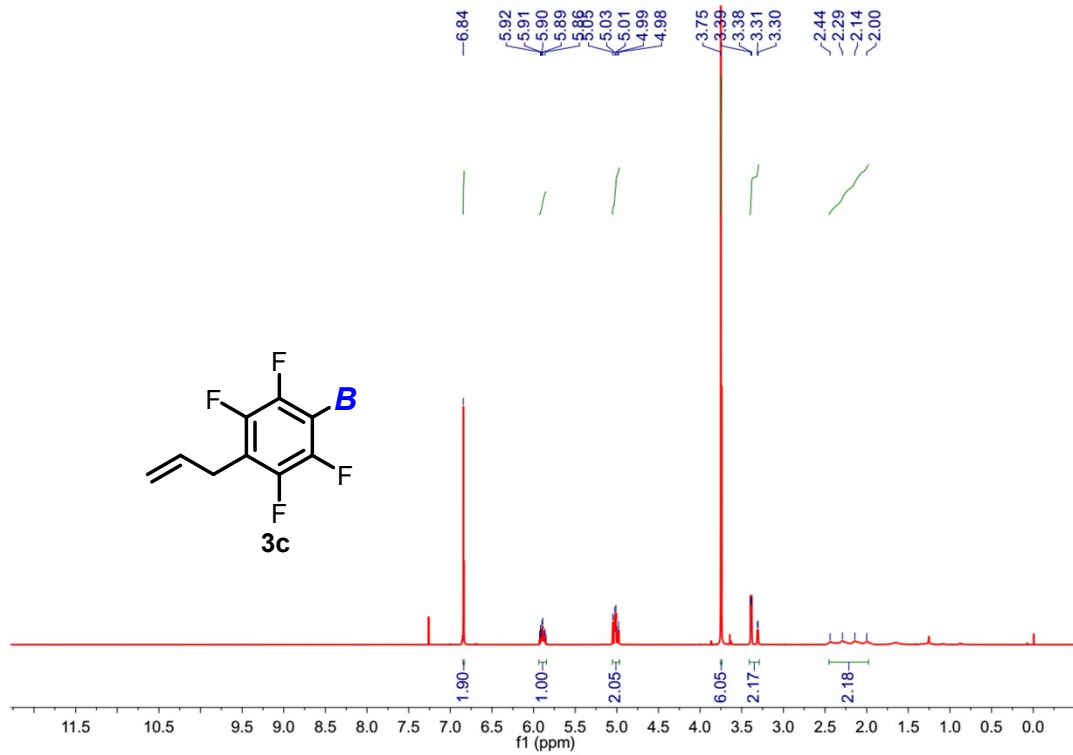

<sup>1</sup>H NMR (600 MHz, CDCl<sub>3</sub>)

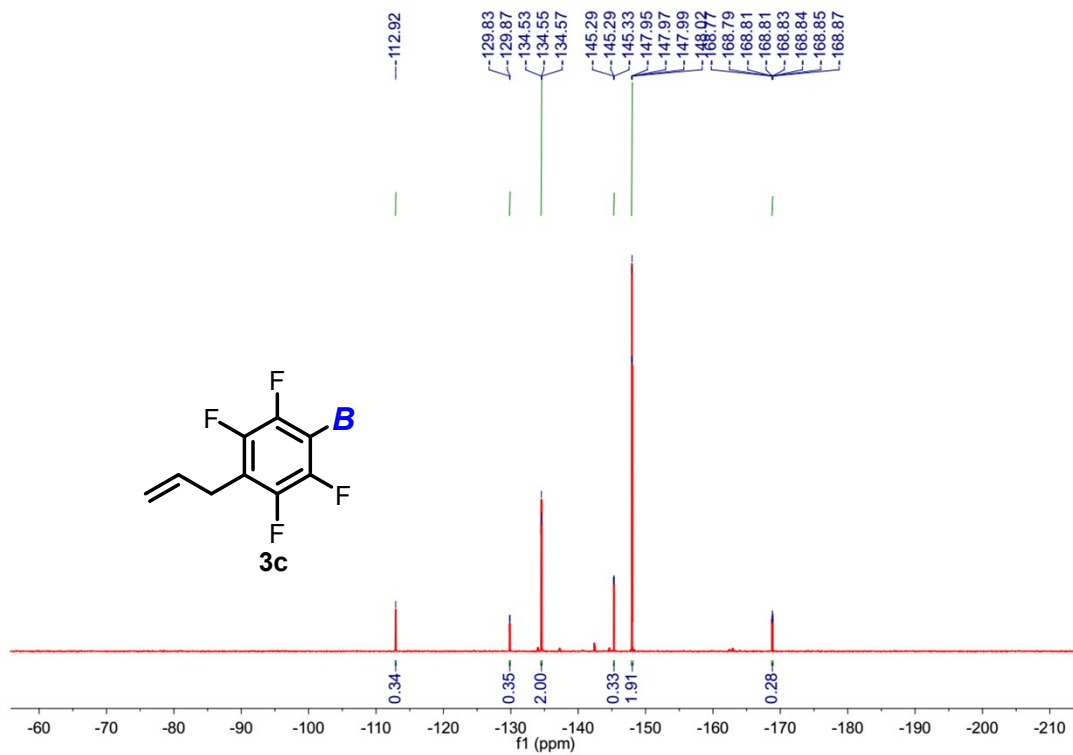

<sup>19</sup>F NMR (565 MHz, CDCl<sub>3</sub>)

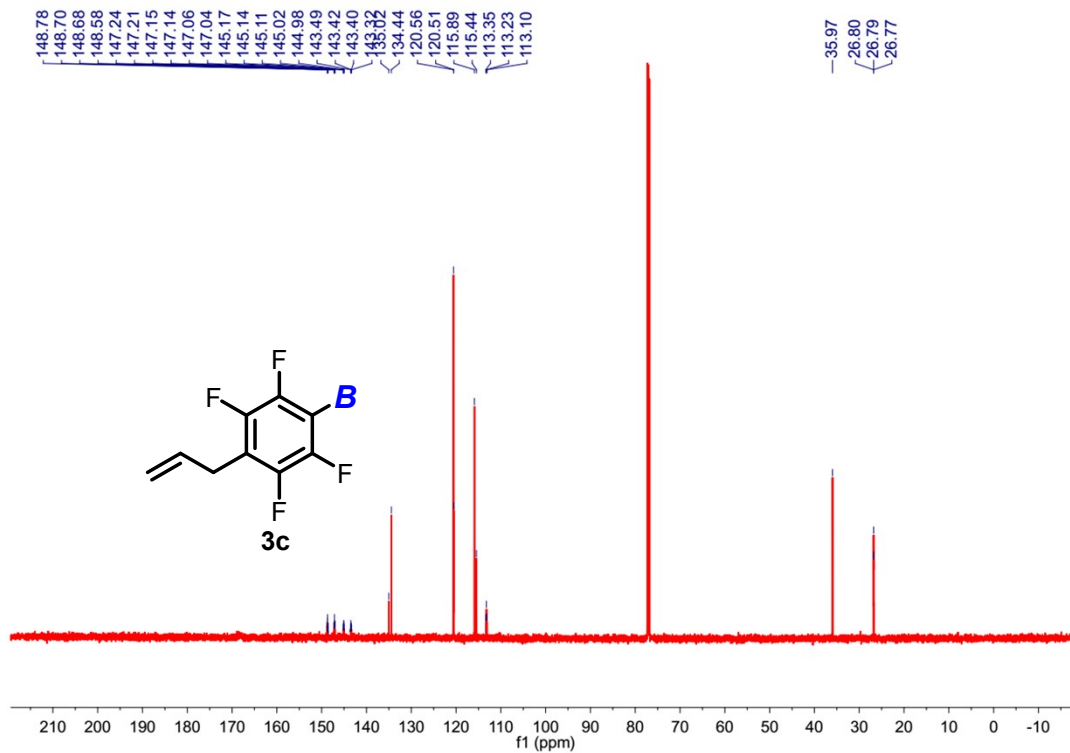

$^{13}\text{C}$  NMR (151 MHz,  $\text{CDCl}_3$ )

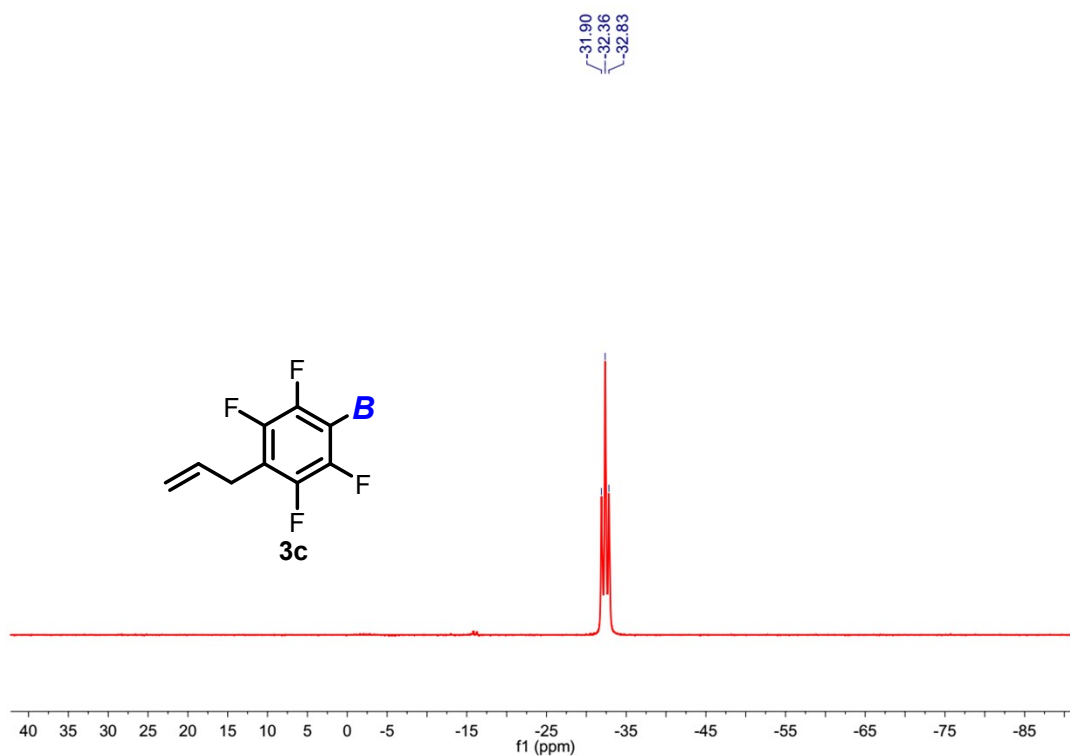

$^{11}\text{B}$  NMR (193 MHz,  $\text{CDCl}_3$ )

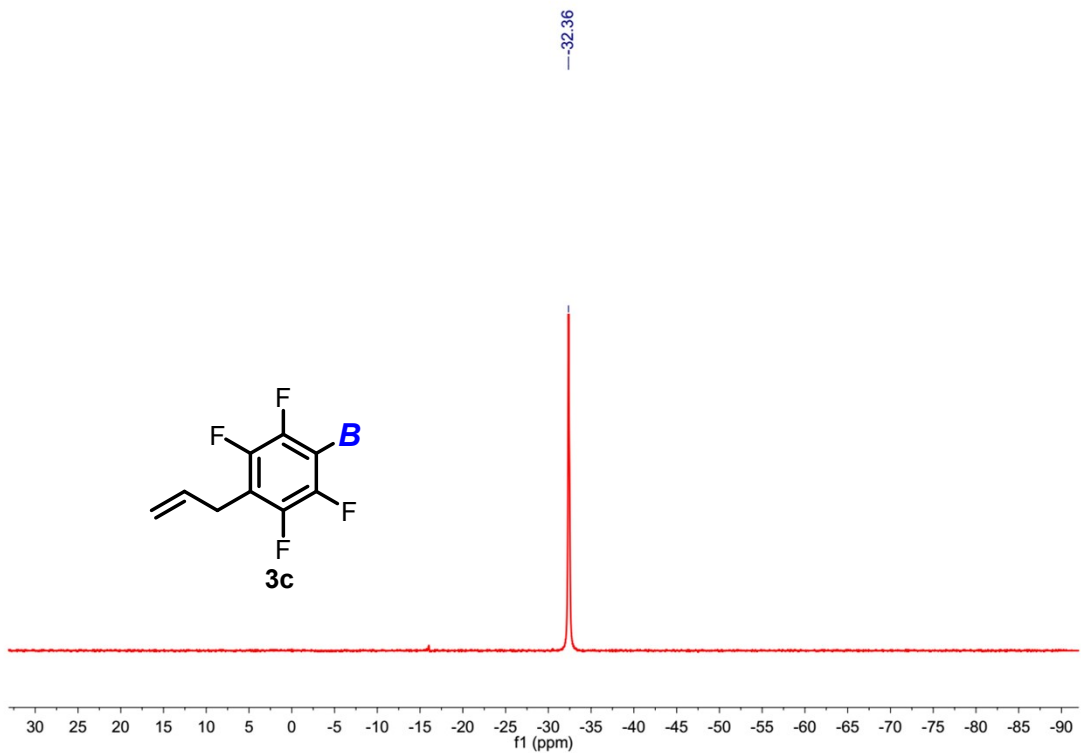

$^{11}\text{B}\{^1\text{H}\}$  NMR (193 MHz,  $\text{CDCl}_3$ )

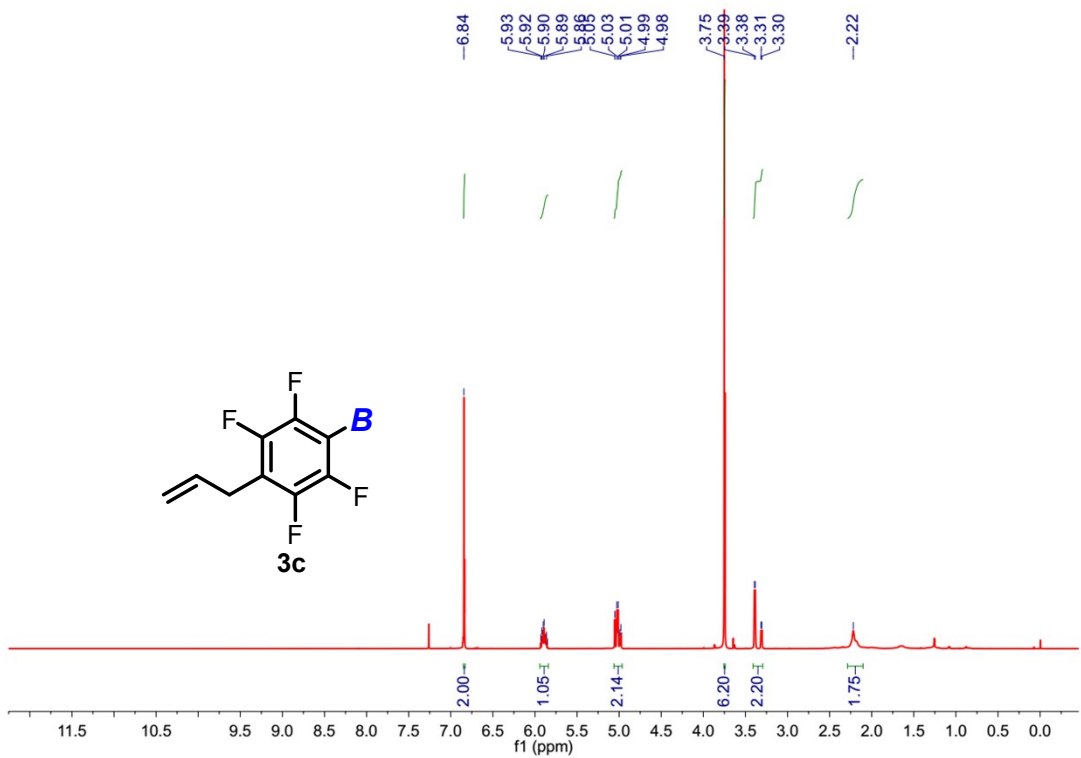

$^1\text{H}\{^{11}\text{B}\}$  NMR (600 MHz,  $\text{CDCl}_3$ )

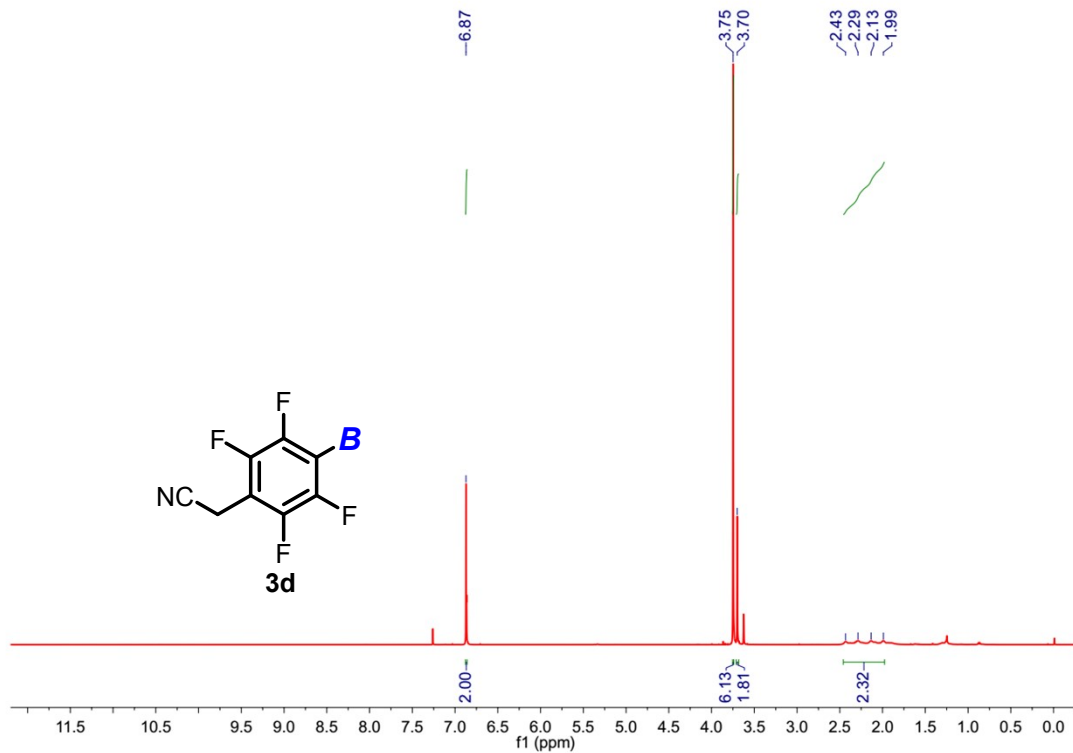

<sup>1</sup>H NMR (600 MHz, CDCl<sub>3</sub>)

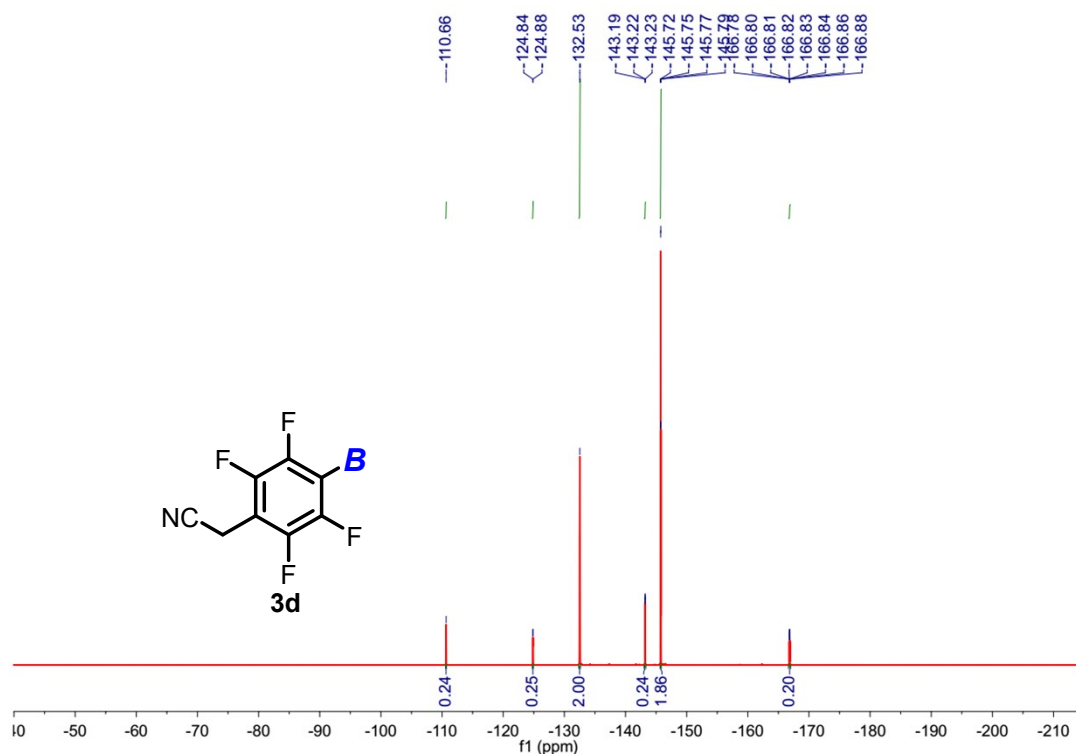

<sup>19</sup>F NMR (565 MHz, CDCl<sub>3</sub>)

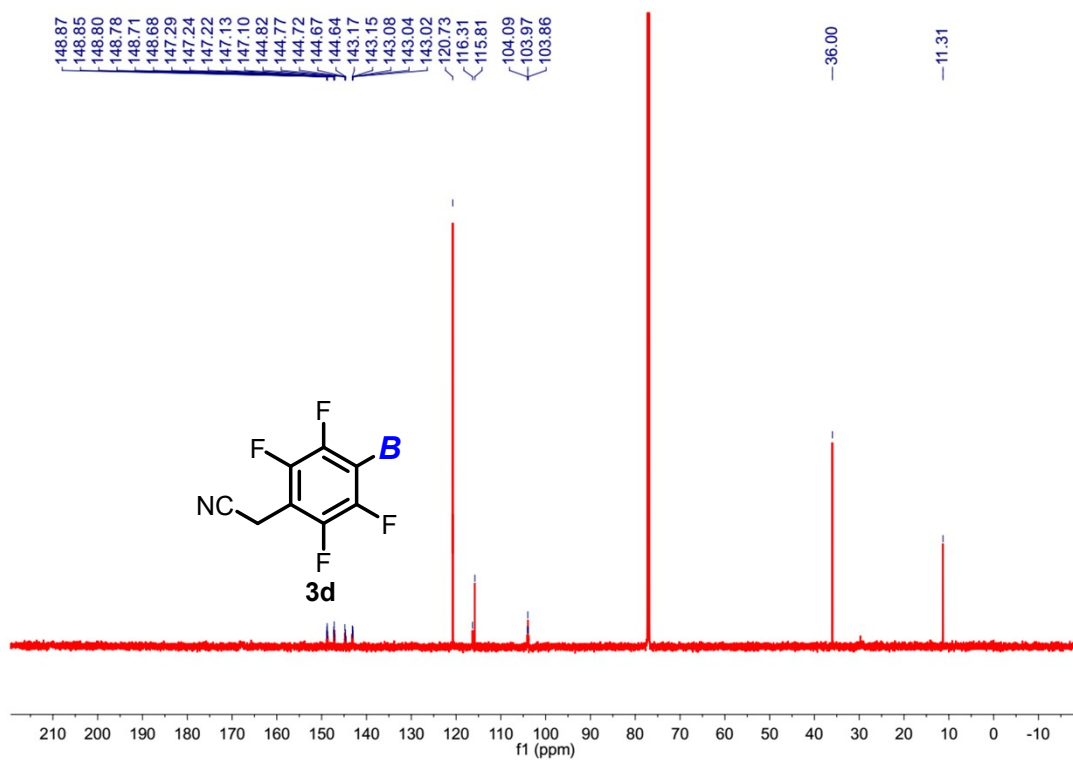

$^{13}\text{C}$  NMR (151 MHz,  $\text{CDCl}_3$ )

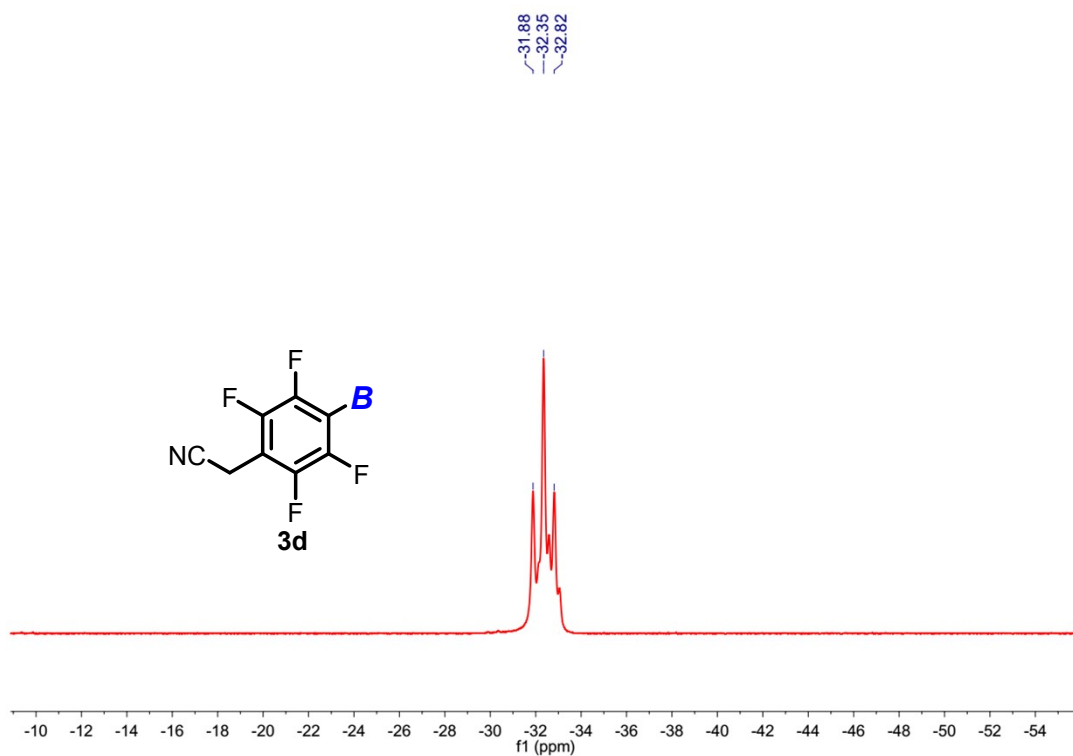

$^{11}\text{B}$  NMR (193 MHz,  $\text{CDCl}_3$ )

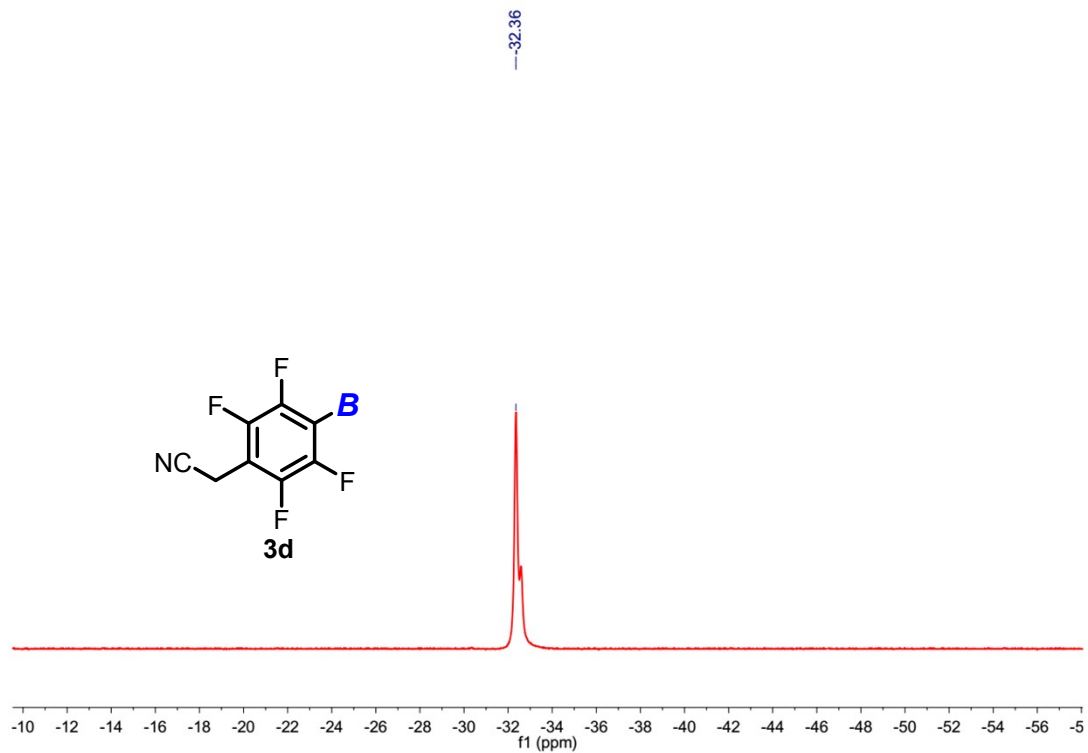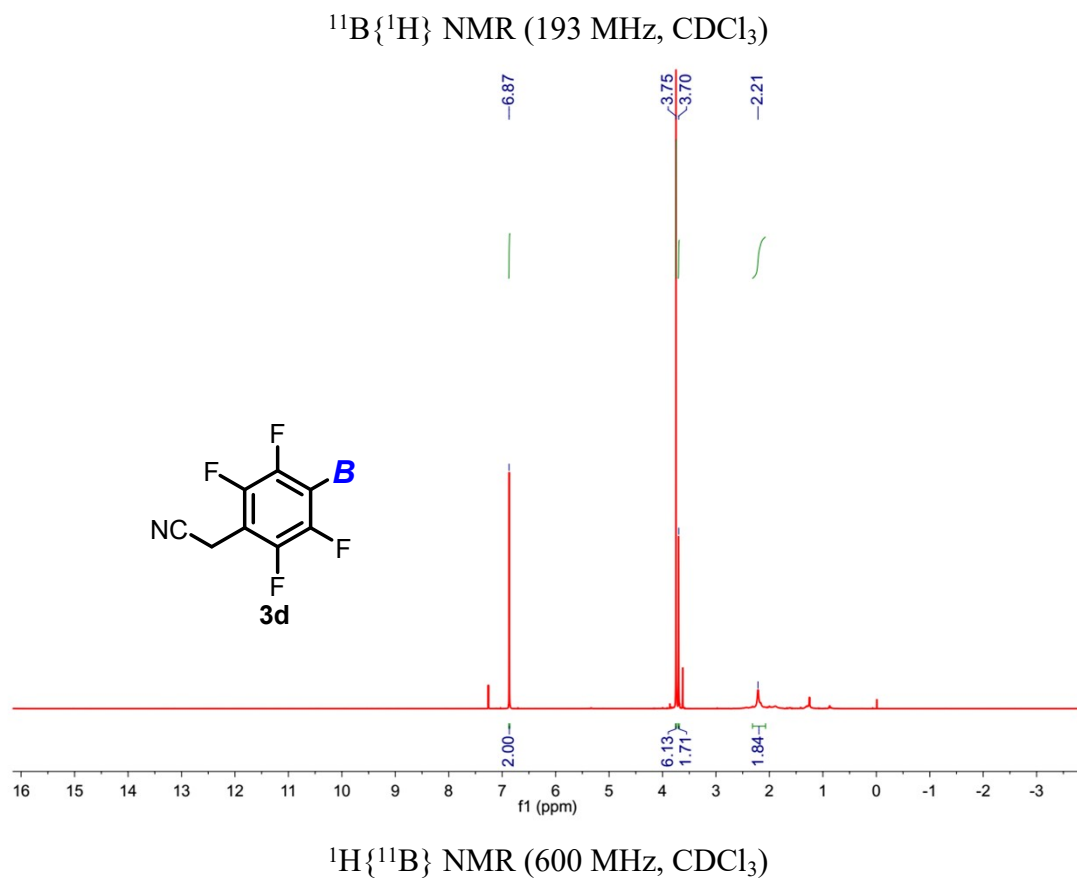



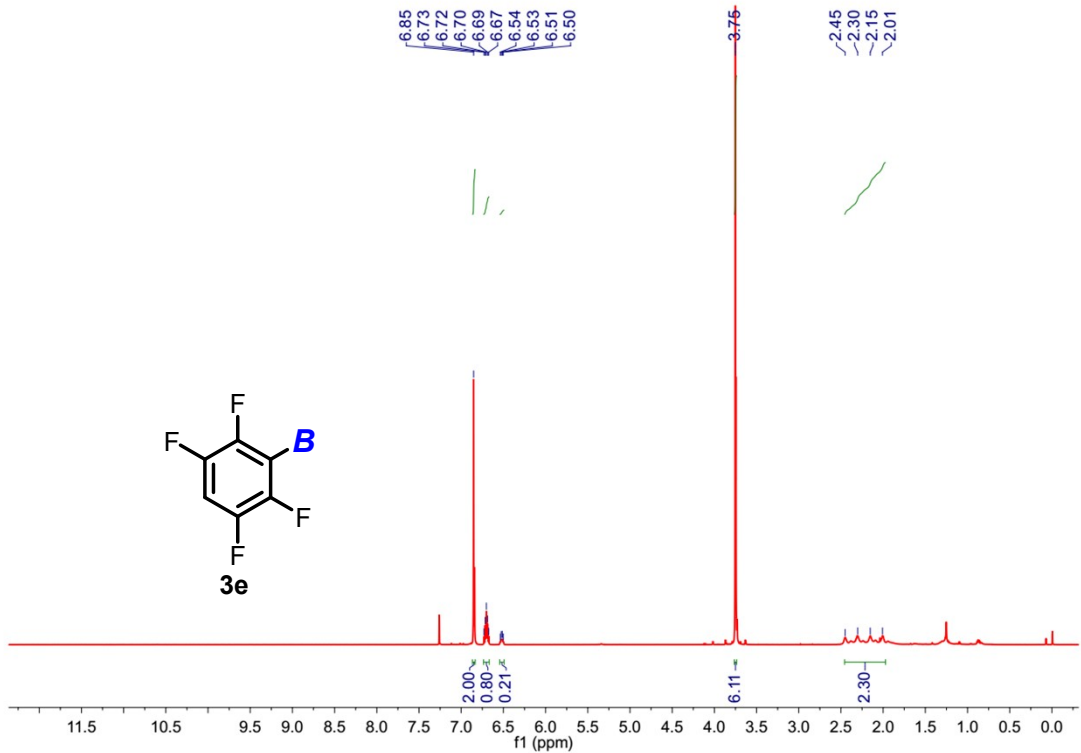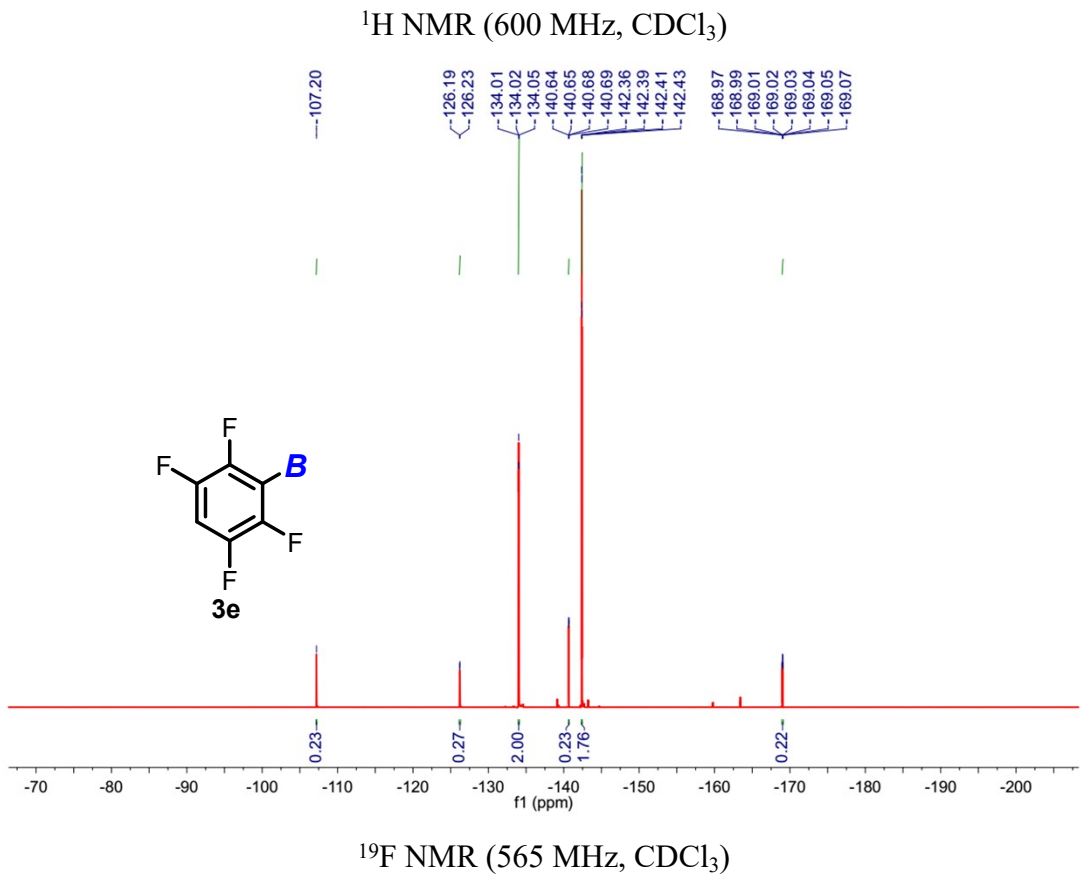

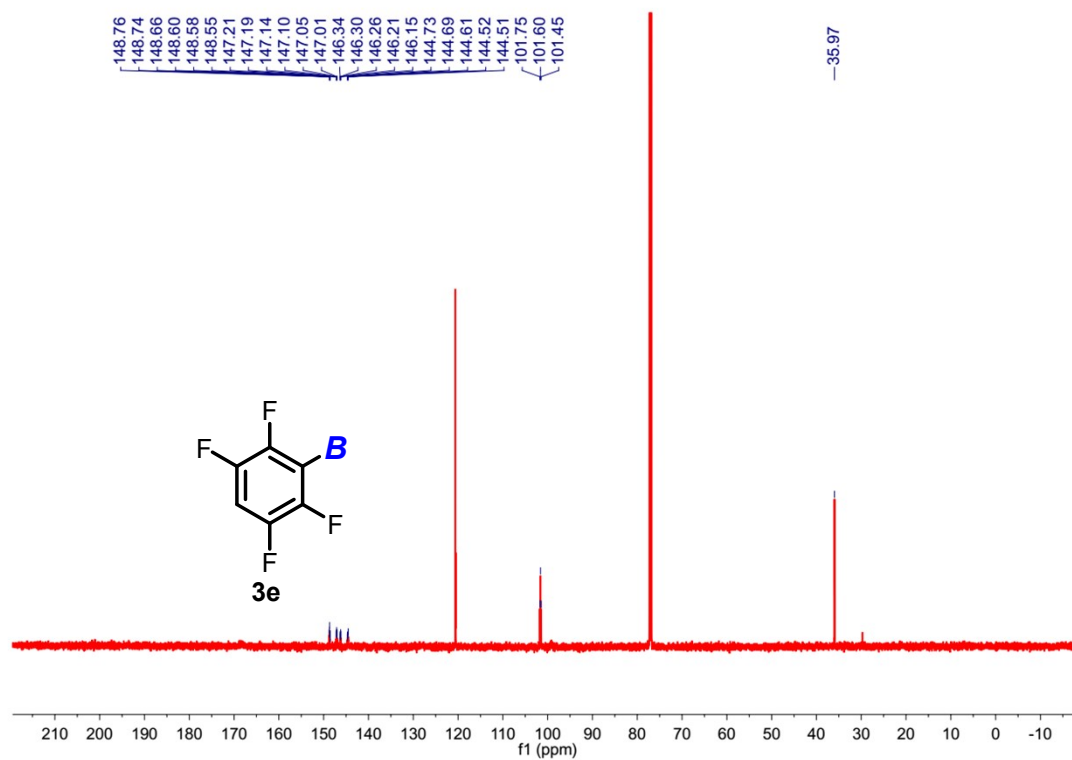

$^{13}\text{C}$  NMR (151 MHz,  $\text{CDCl}_3$ )

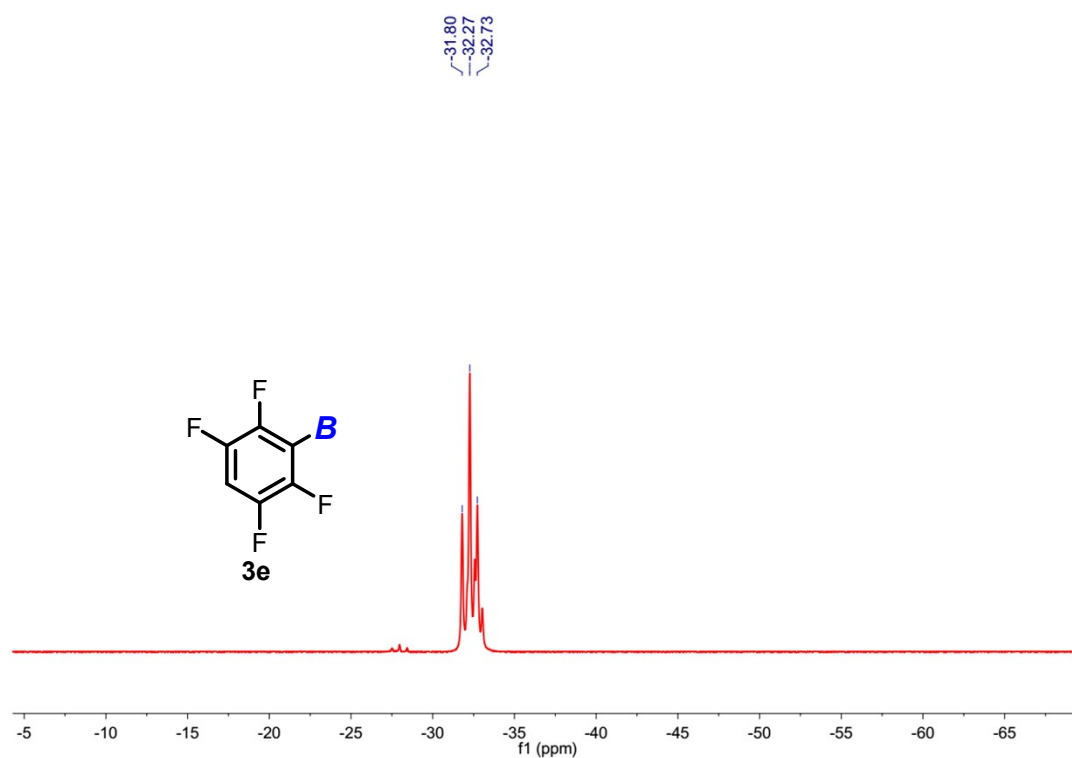

$^{11}\text{B}$  NMR (193 MHz,  $\text{CDCl}_3$ )

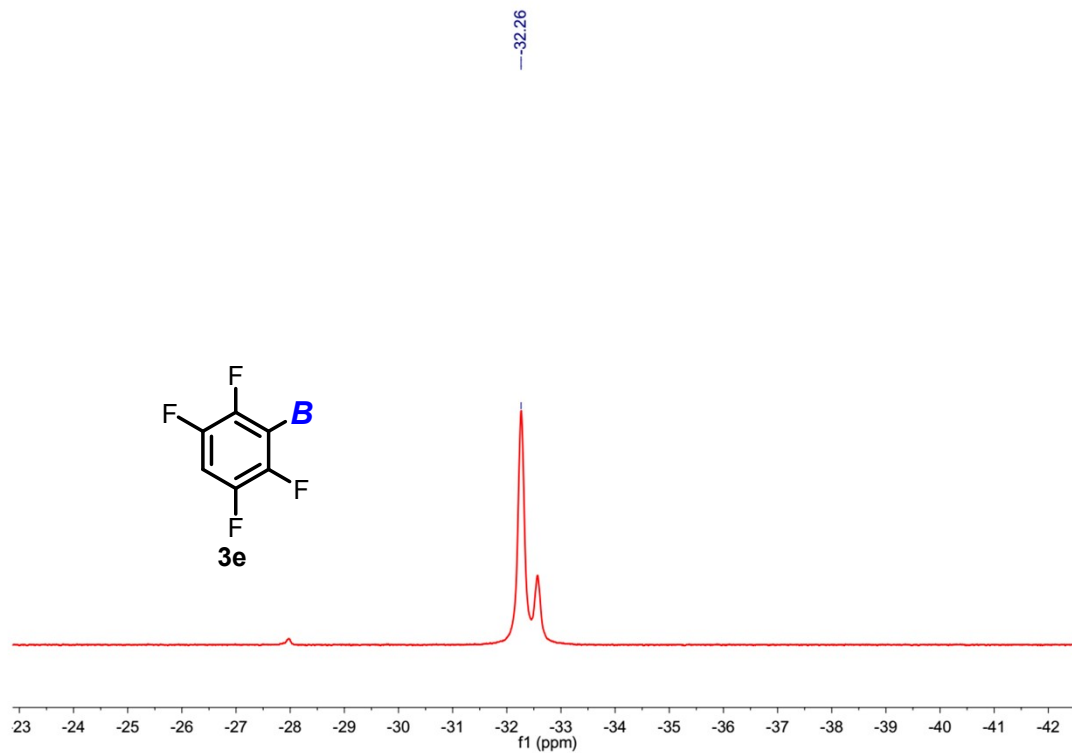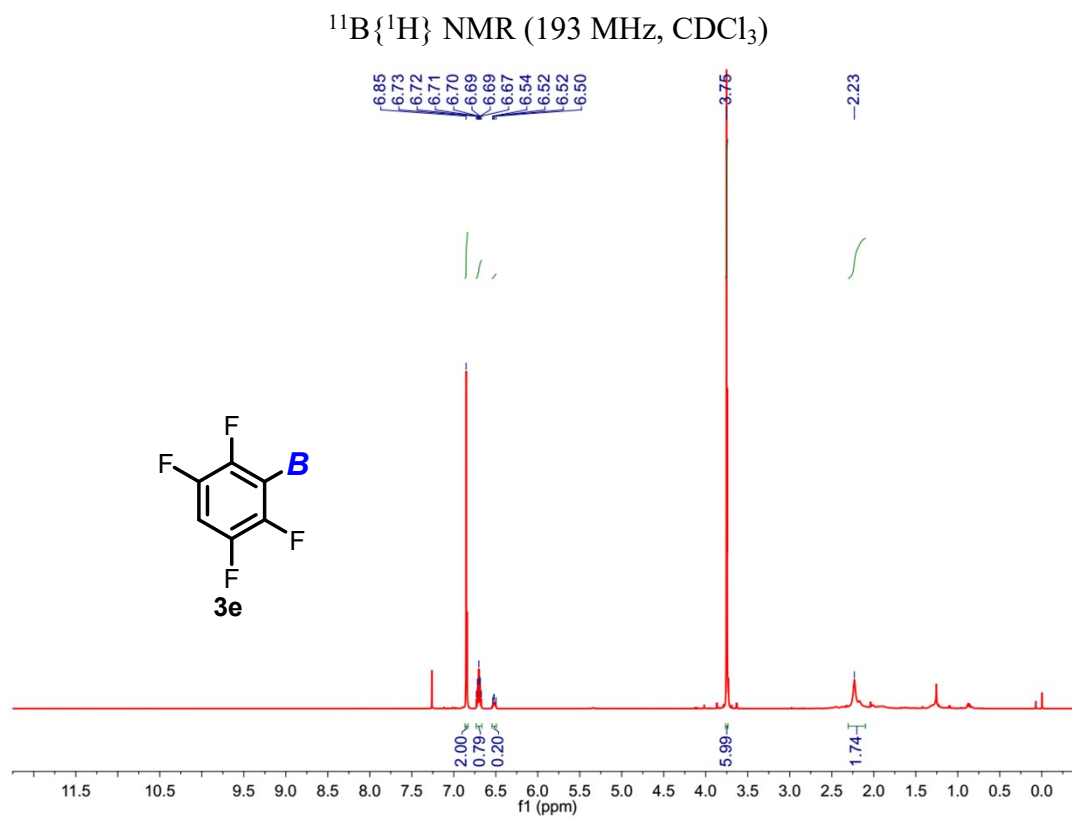

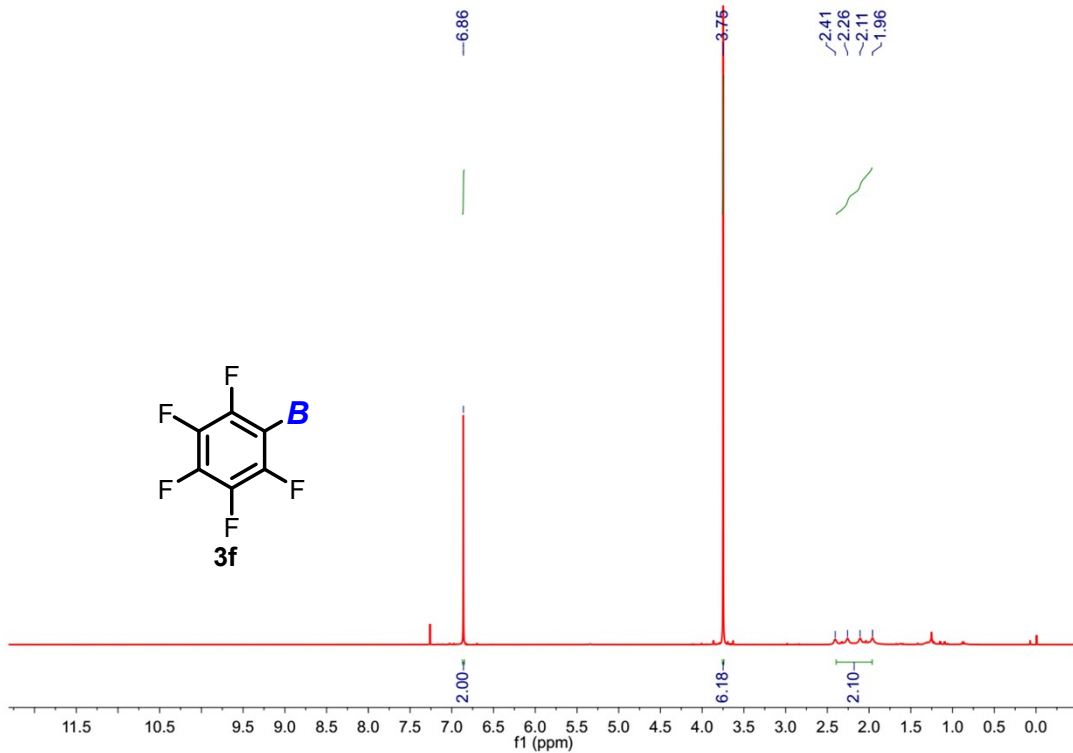

<sup>1</sup>H NMR (600 MHz, CDCl<sub>3</sub>)

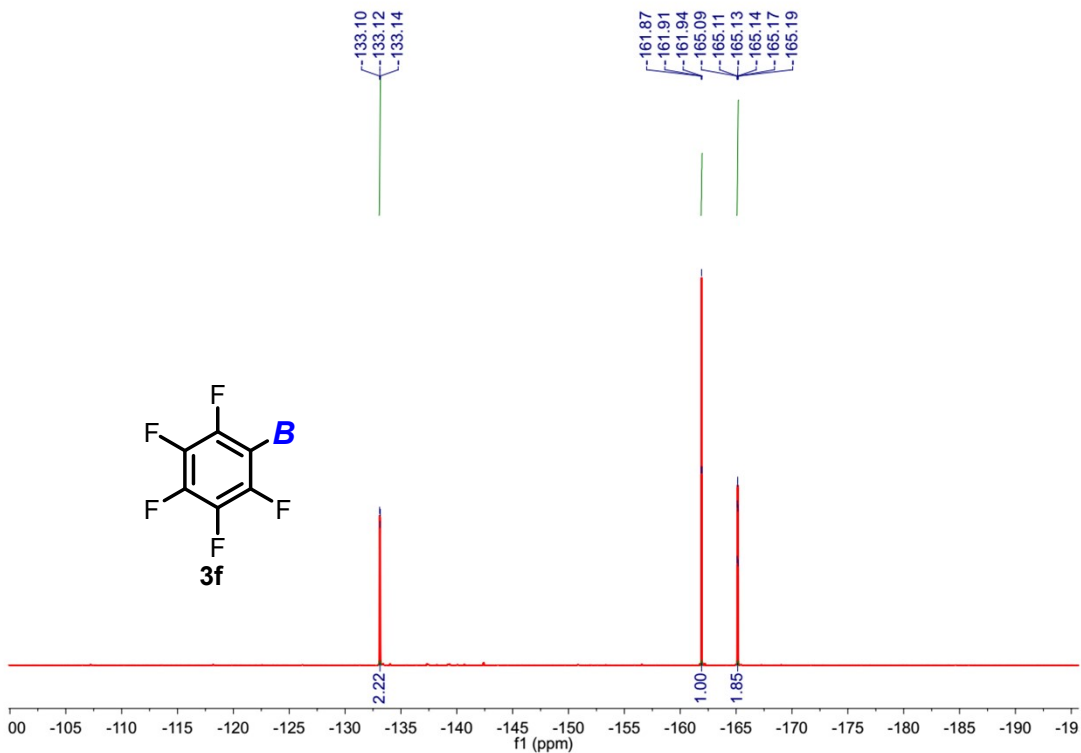

<sup>19</sup>F NMR (565 MHz, CDCl<sub>3</sub>)

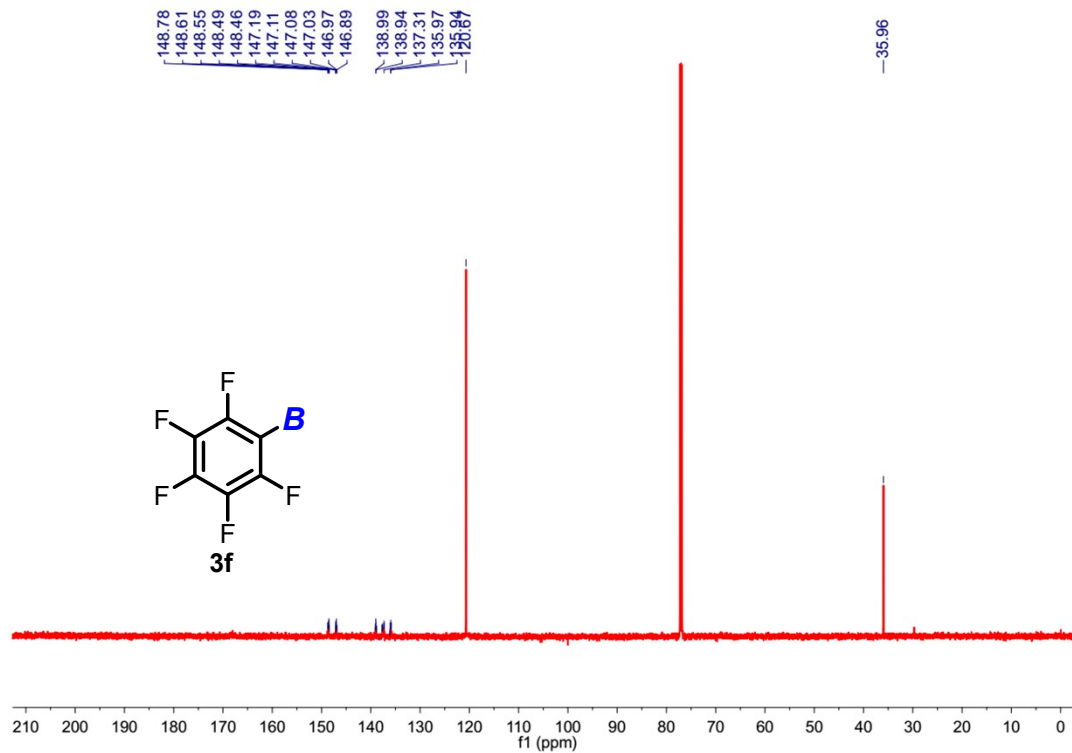

$^{13}\text{C}$  NMR (151 MHz,  $\text{CDCl}_3$ )

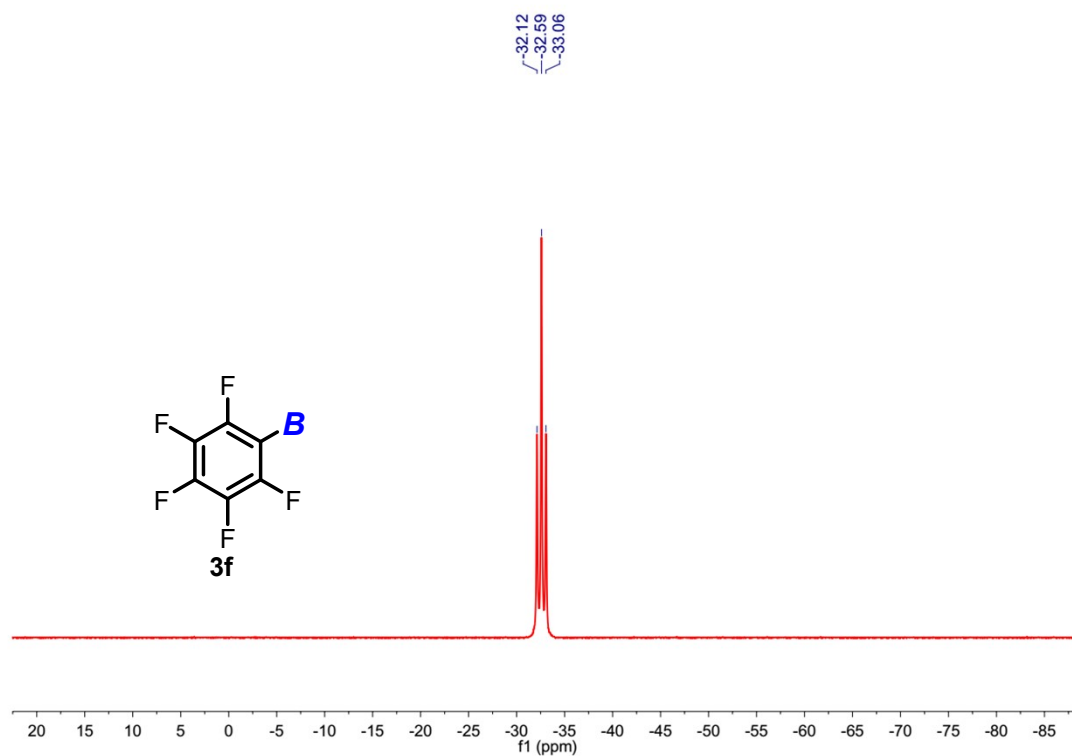

$^{11}\text{B}$  NMR (193 MHz,  $\text{CDCl}_3$ )

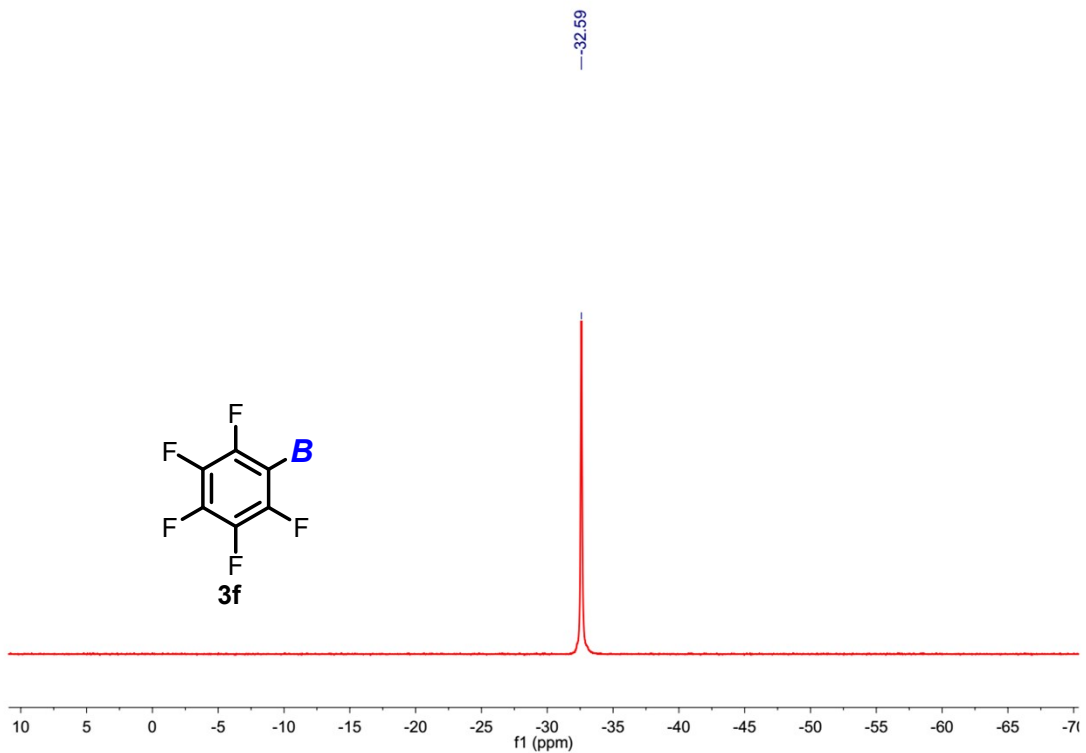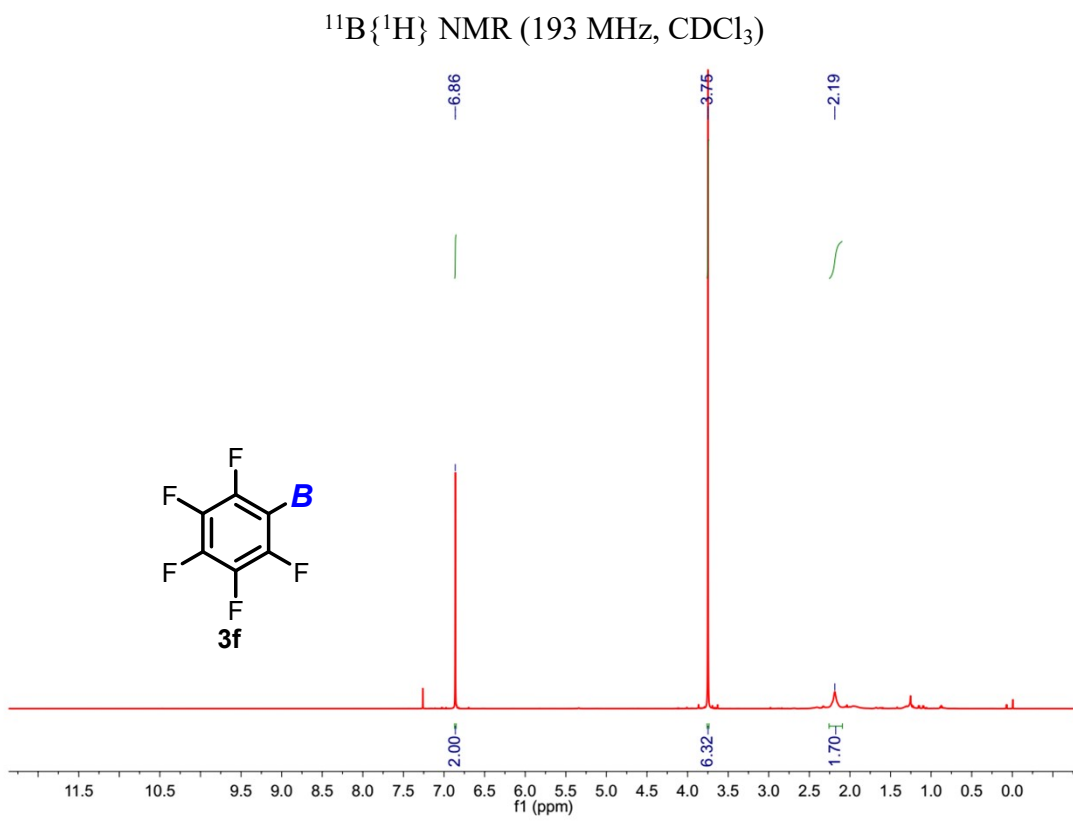

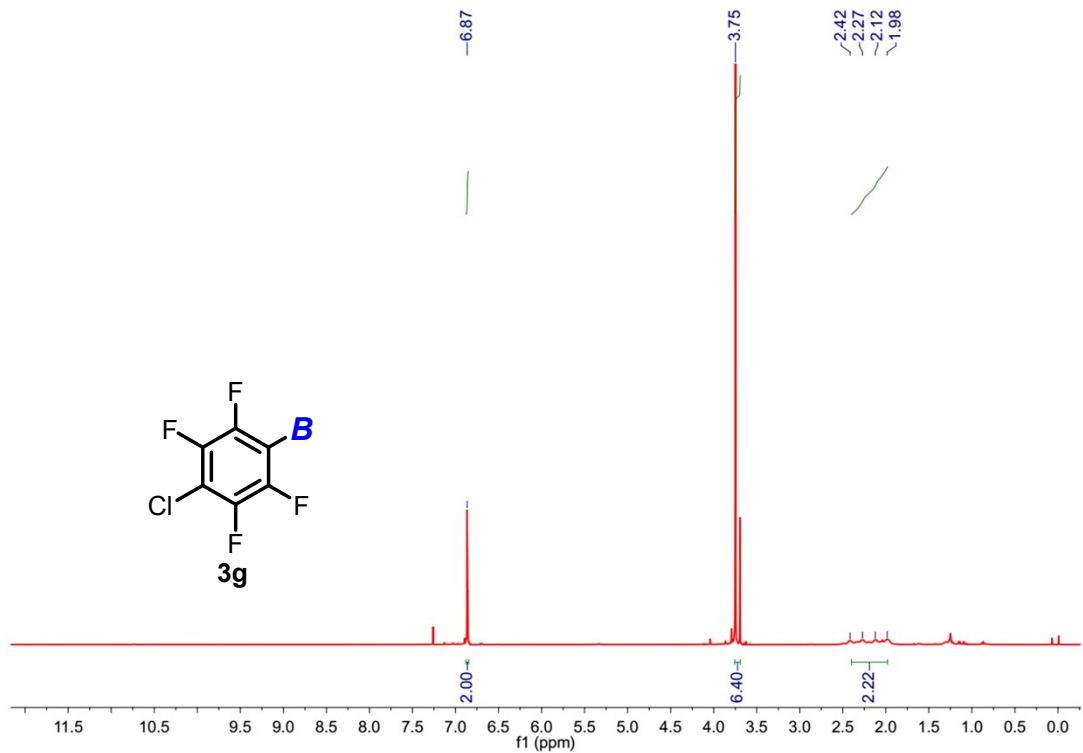

$^1\text{H NMR}$  (600 MHz,  $\text{CDCl}_3$ )

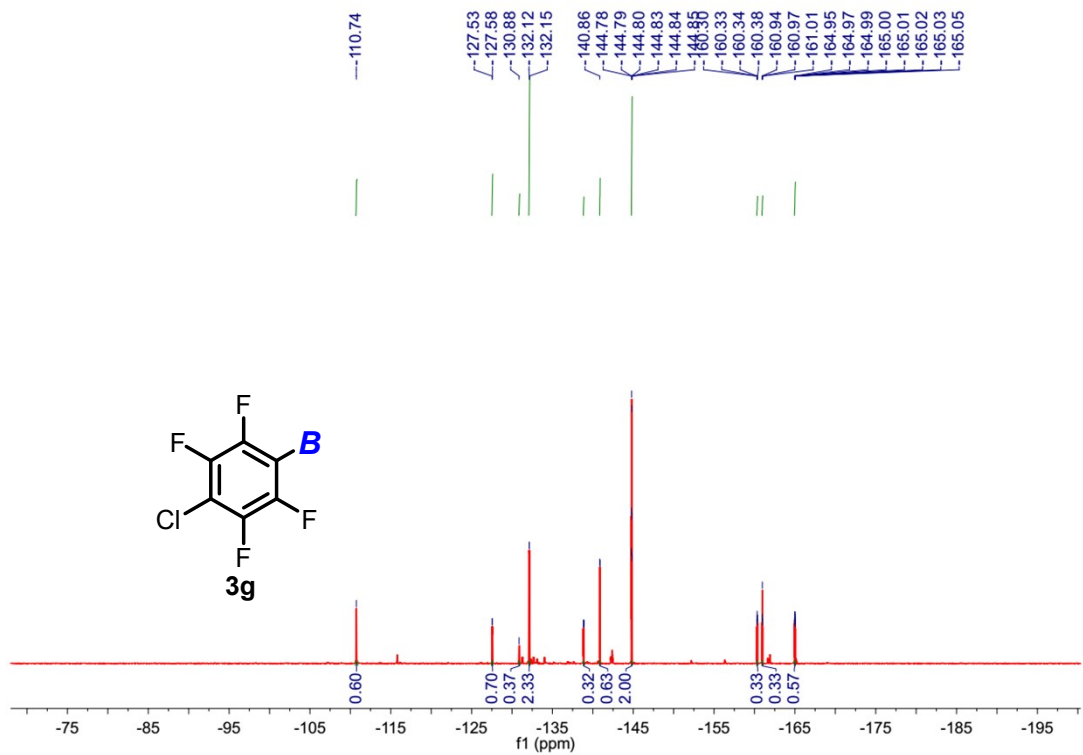

$^{19}\text{F NMR}$  (565 MHz,  $\text{CDCl}_3$ )

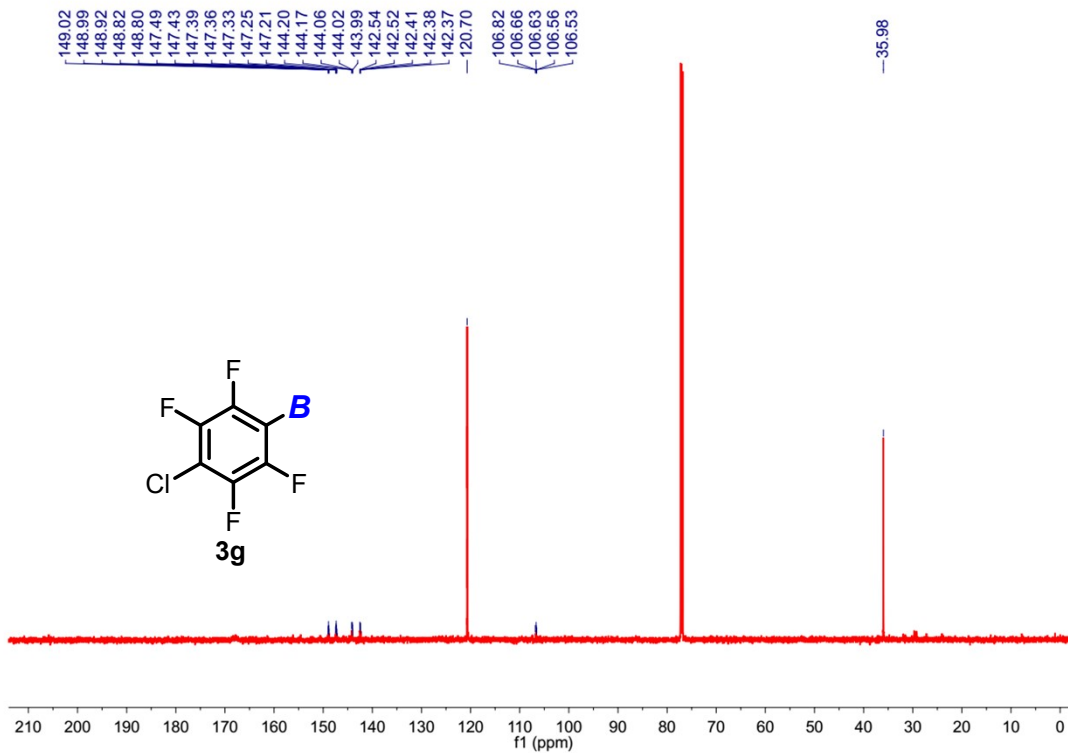

$^{13}\text{C}$  NMR (151 MHz,  $\text{CDCl}_3$ )

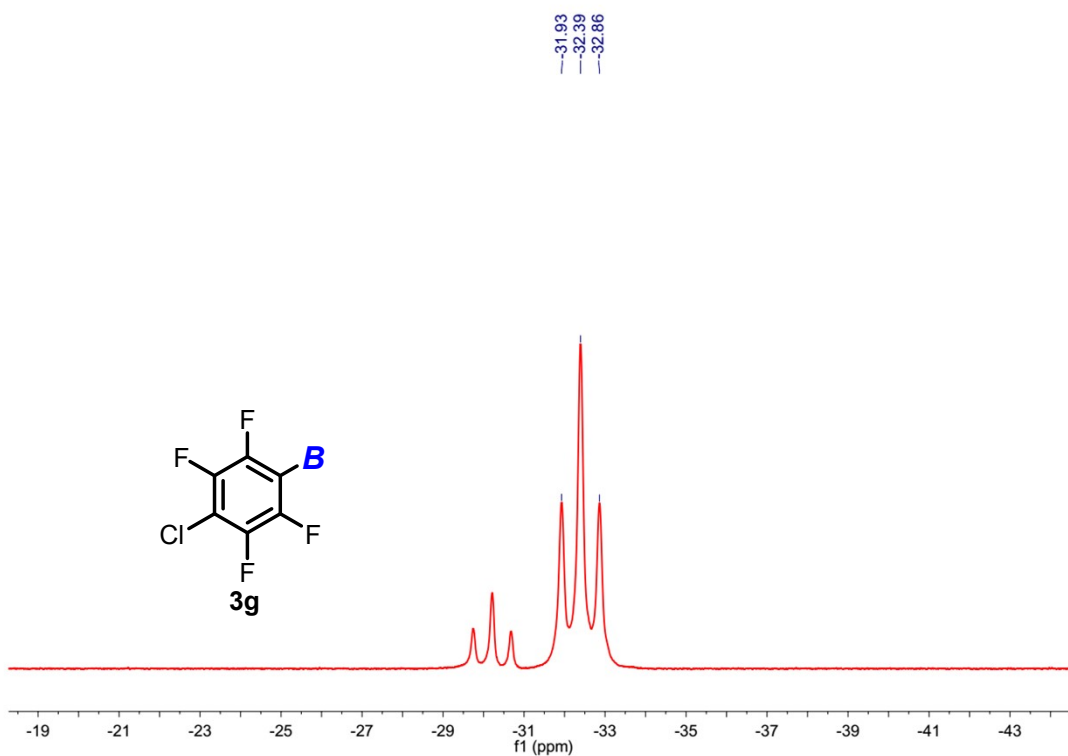

$^{11}\text{B}$  NMR (193 MHz,  $\text{CDCl}_3$ )



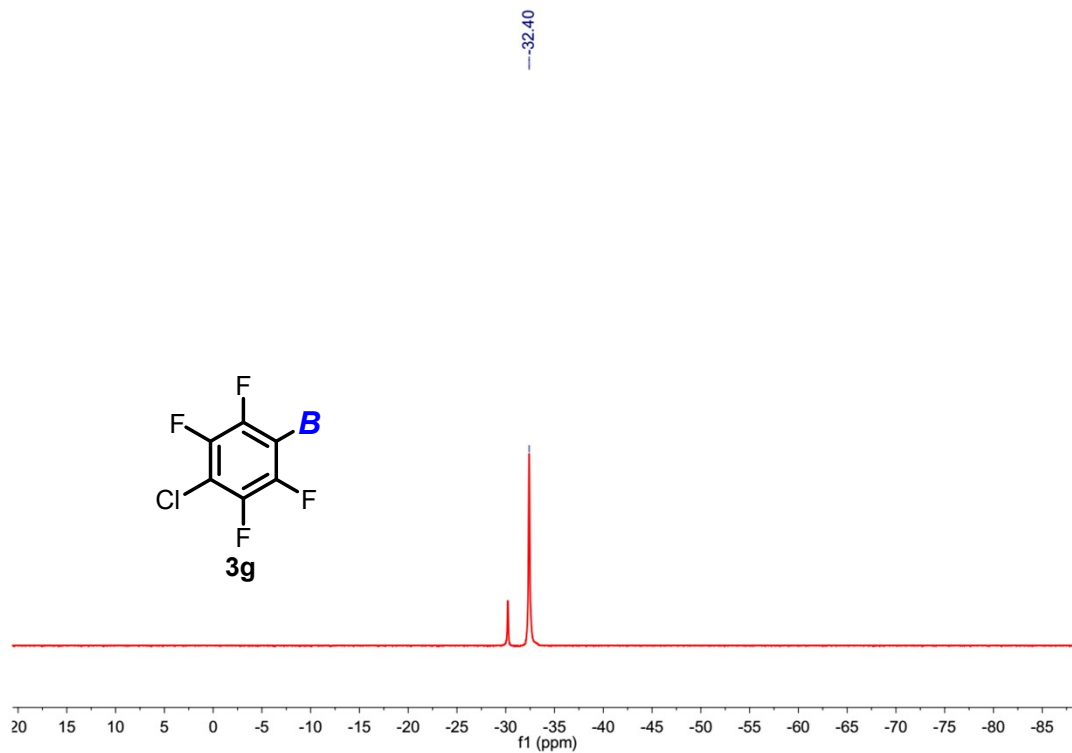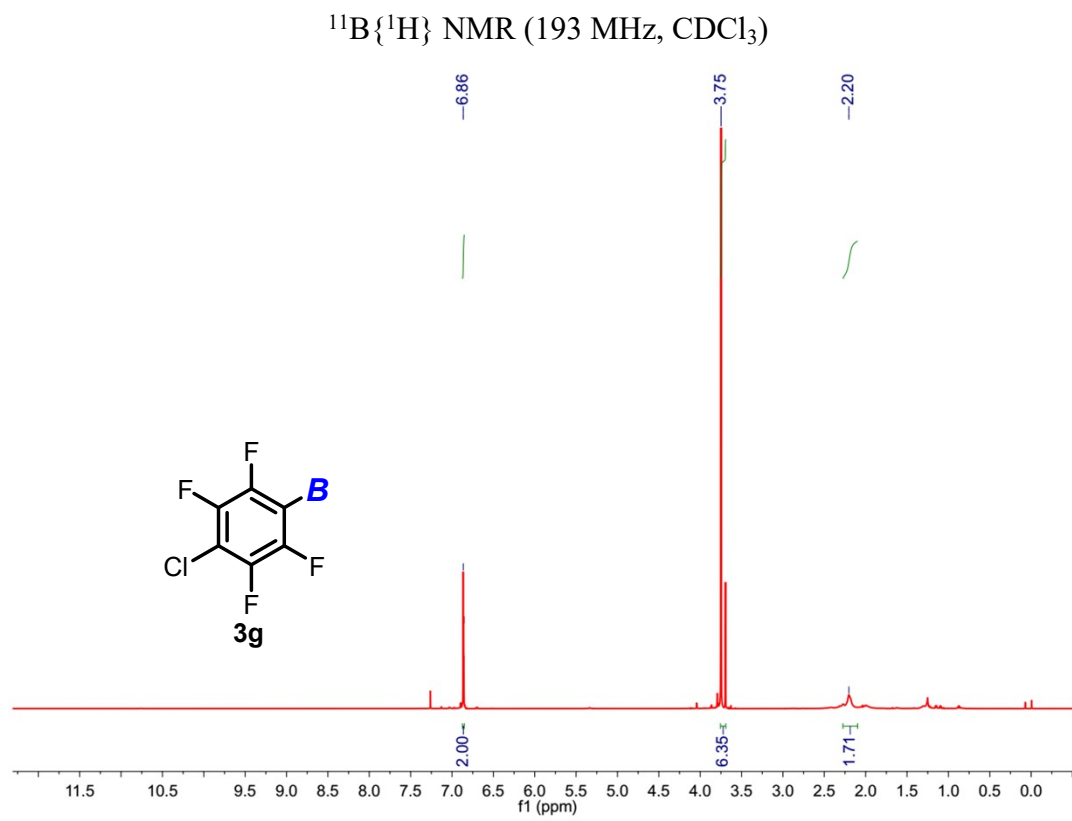

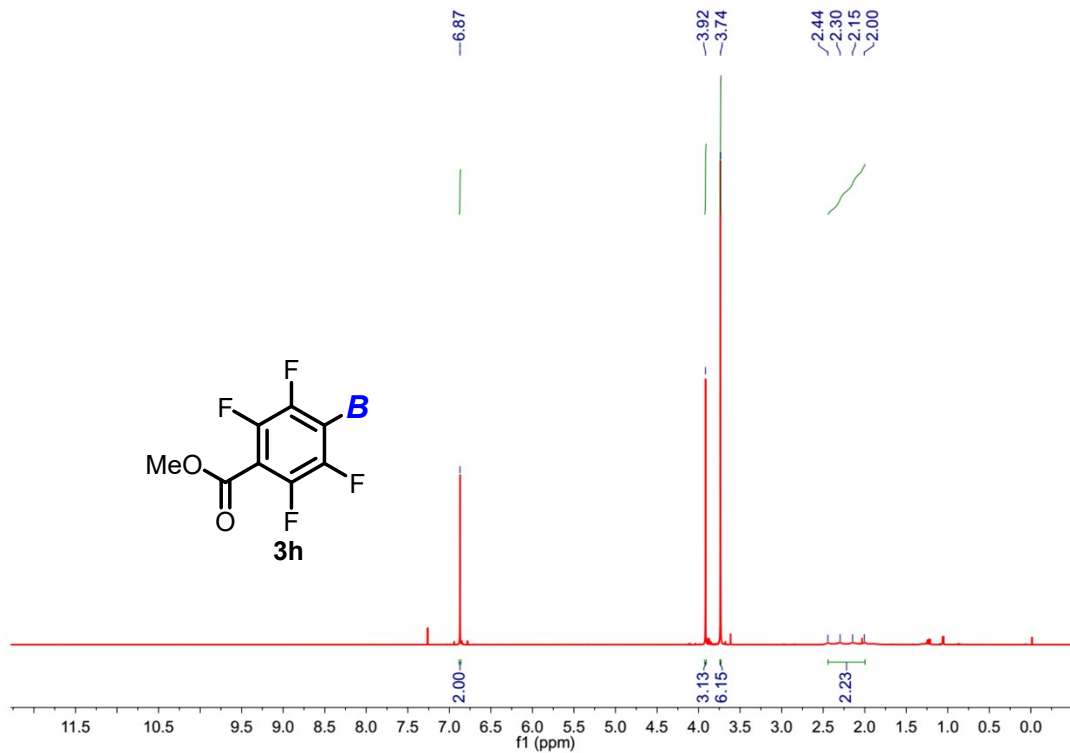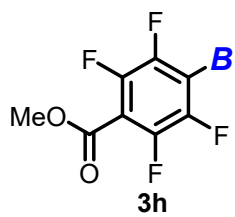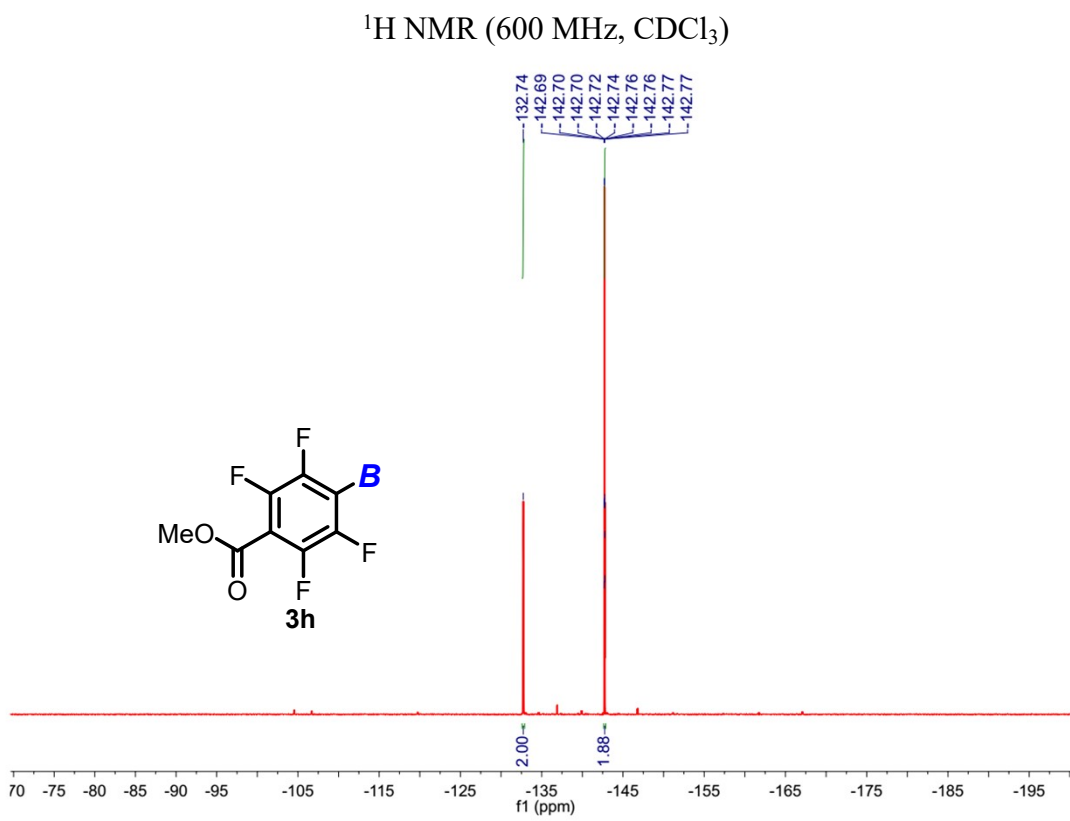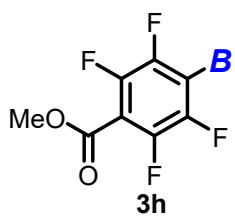

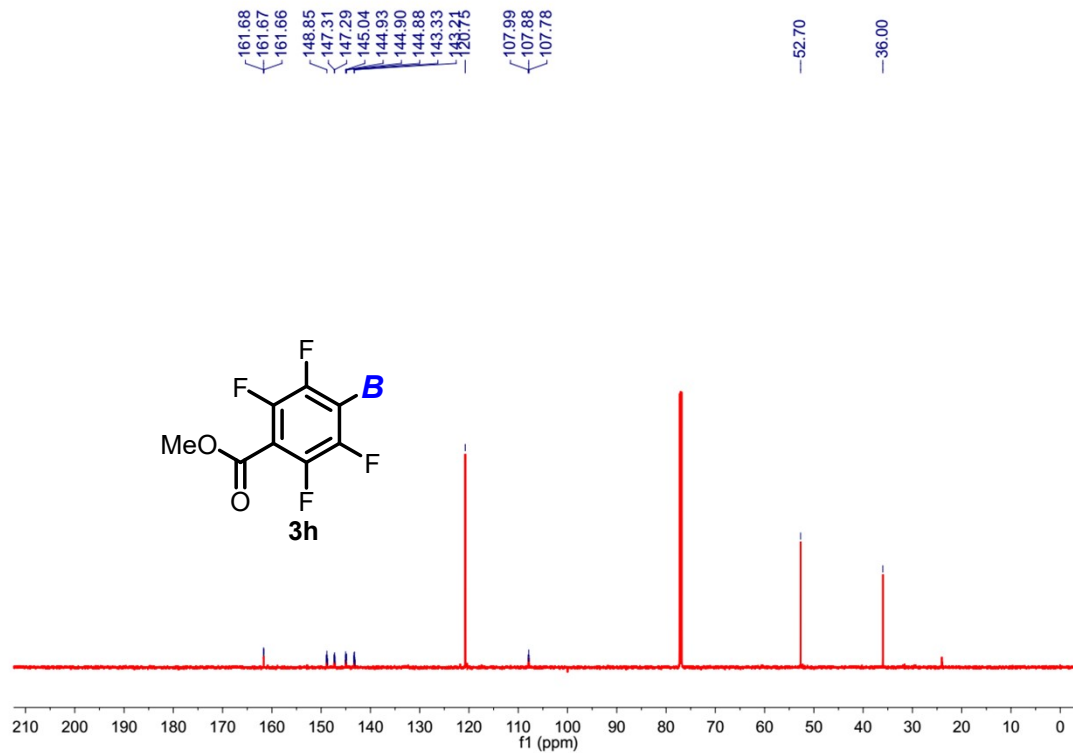

$^{13}\text{C}$  NMR (151 MHz,  $\text{CDCl}_3$ )

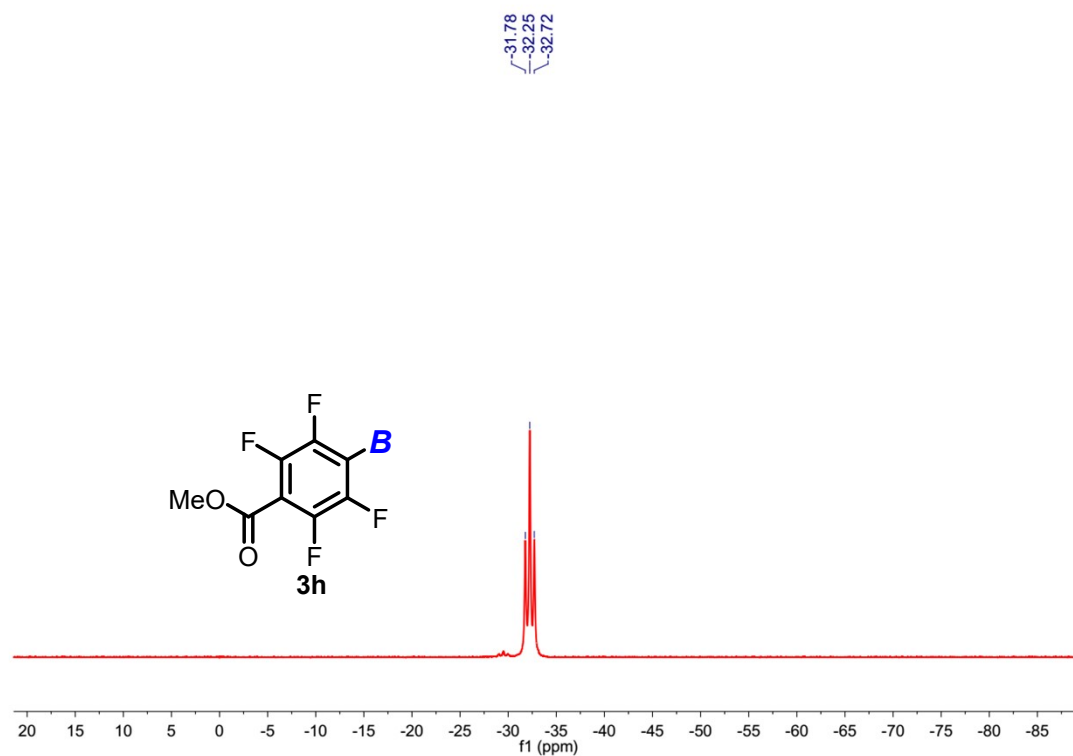

$^{11}\text{B}$  NMR (193 MHz,  $\text{CDCl}_3$ )

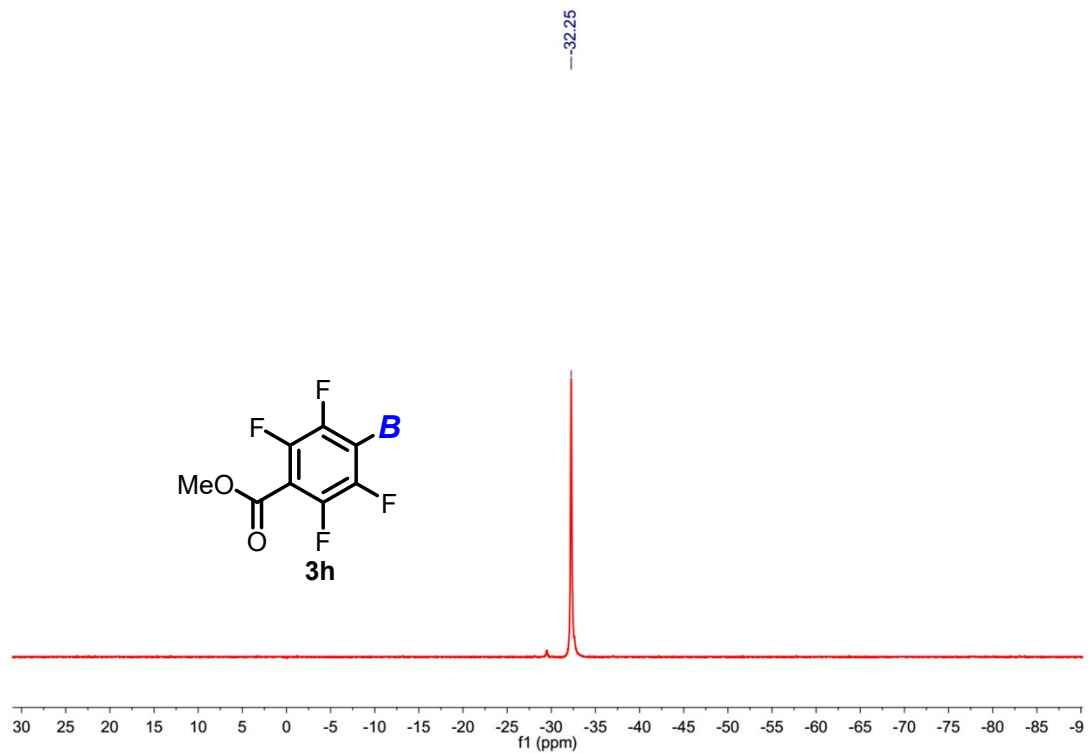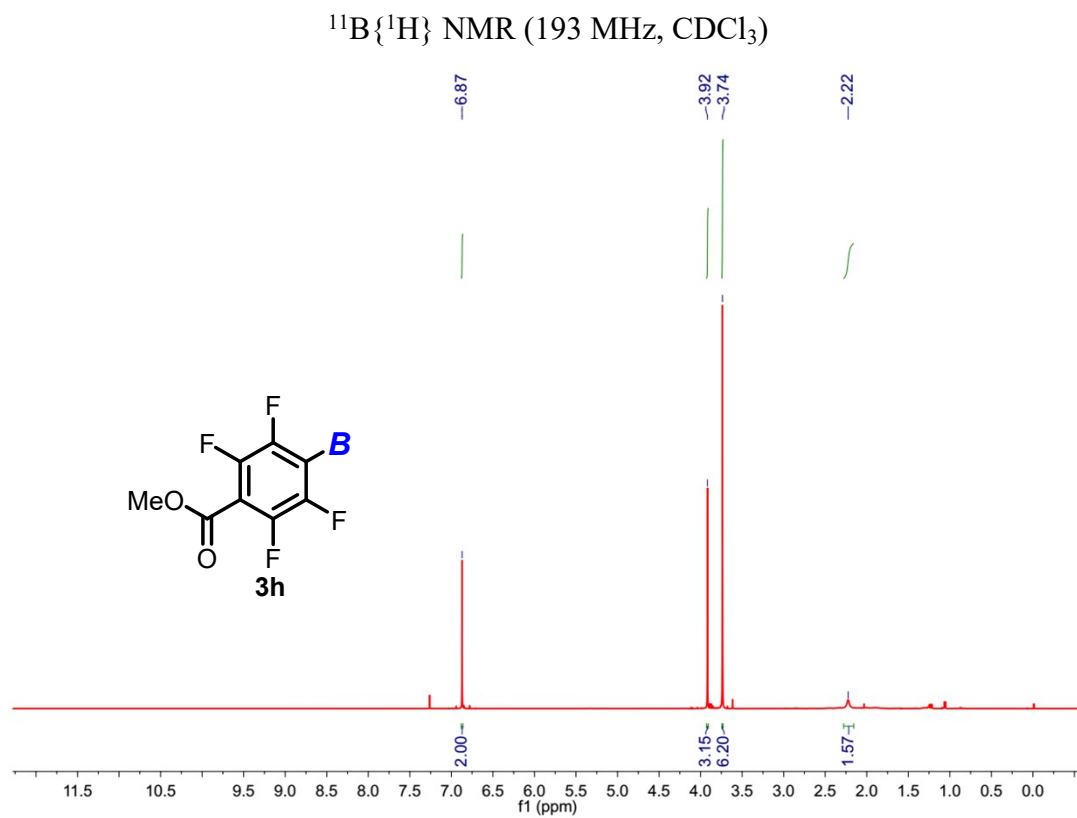

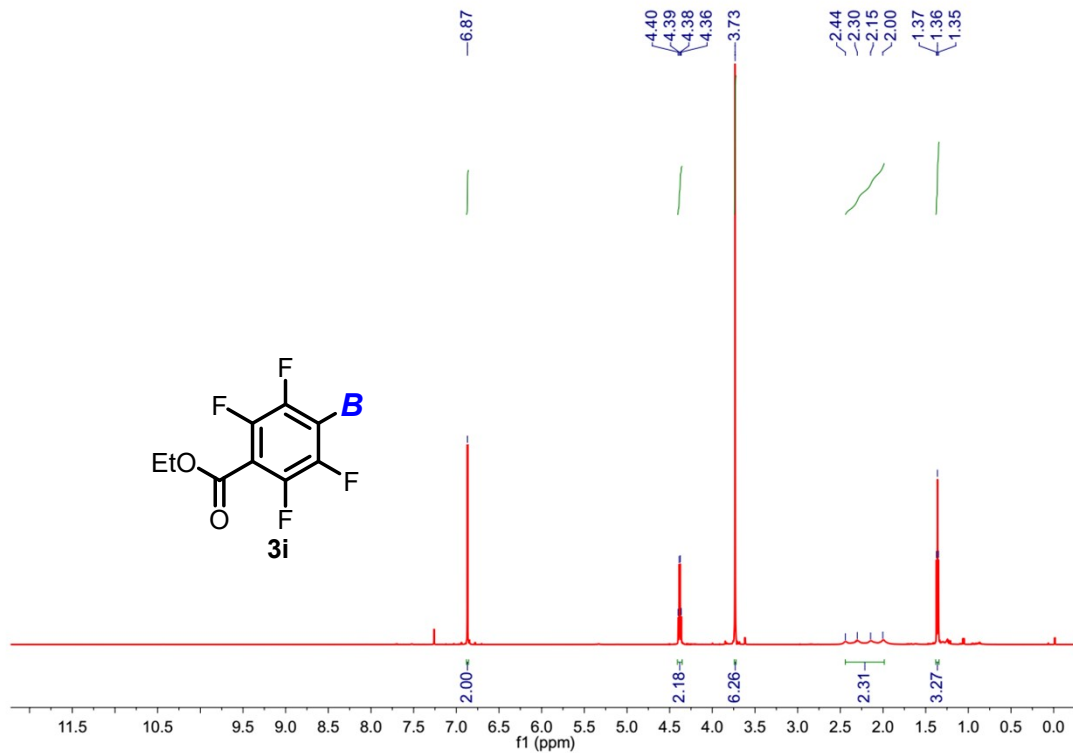

<sup>1</sup>H NMR (600 MHz, CDCl<sub>3</sub>)

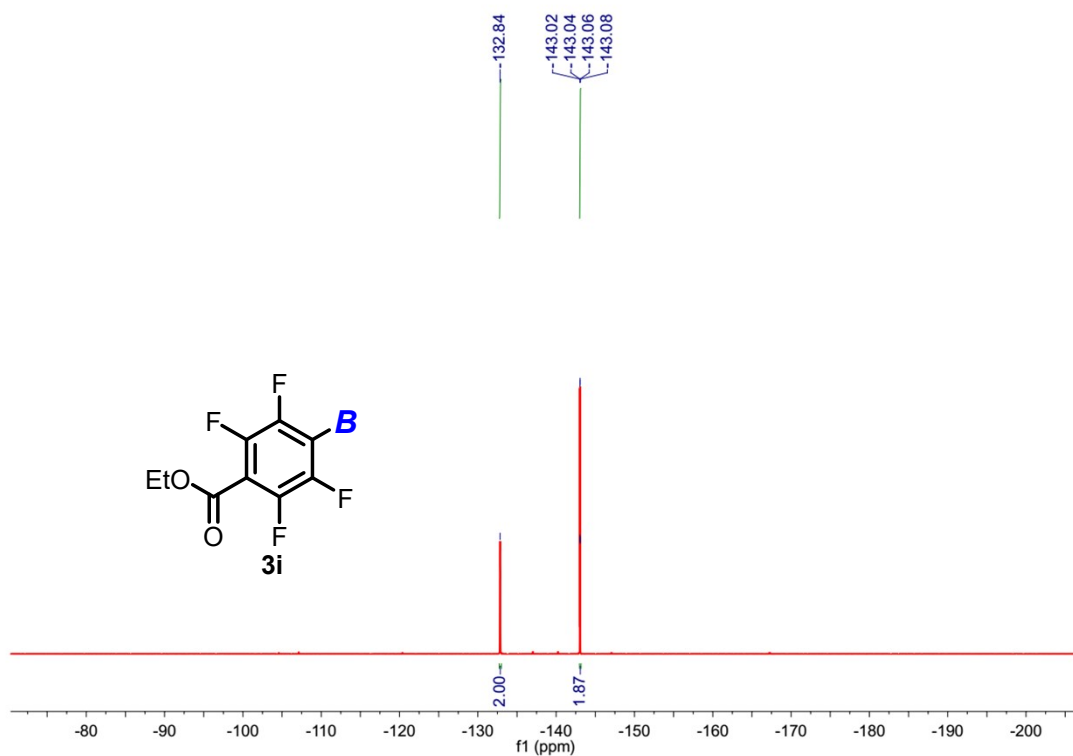

<sup>19</sup>F NMR (565 MHz, CDCl<sub>3</sub>)

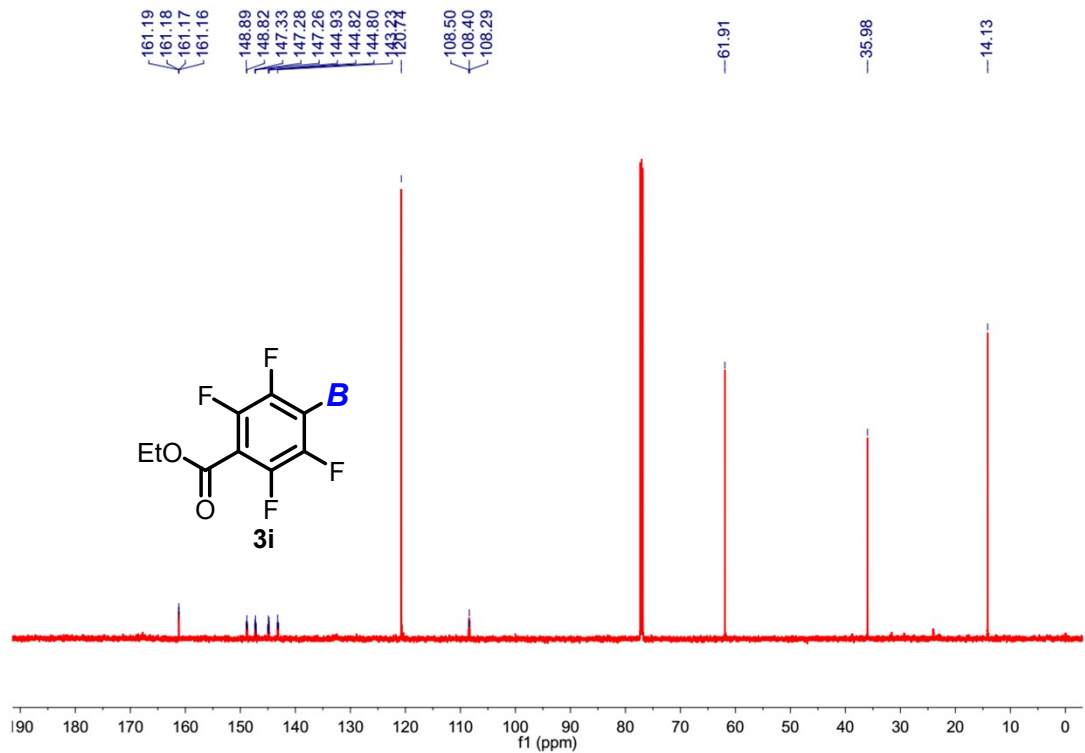

$^{13}\text{C}$  NMR (151 MHz,  $\text{CDCl}_3$ )

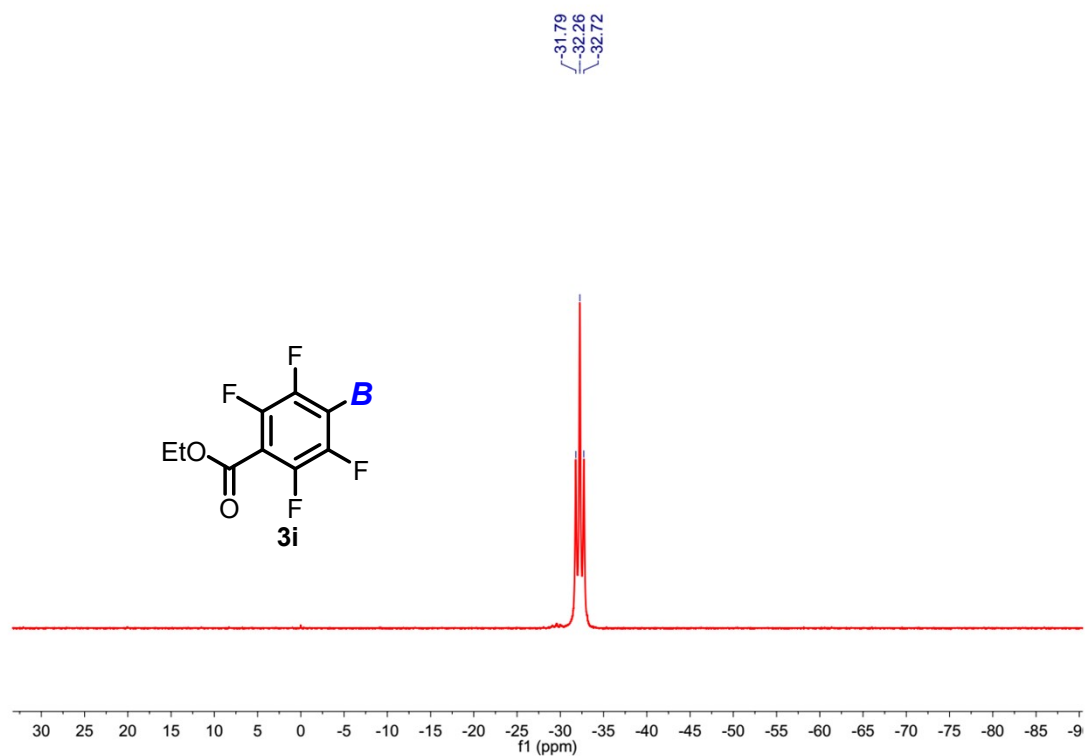

$^{11}\text{B}$  NMR (193 MHz,  $\text{CDCl}_3$ )

---32.26

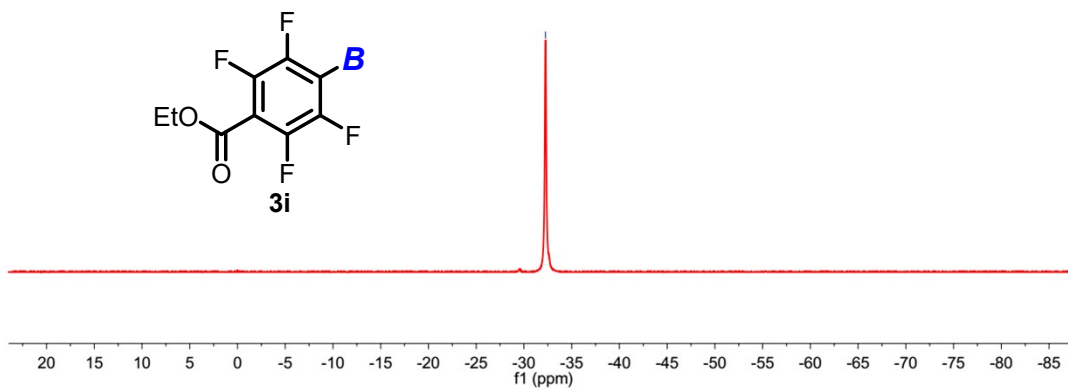

$^{11}\text{B}\{^1\text{H}\}$  NMR (193 MHz,  $\text{CDCl}_3$ )

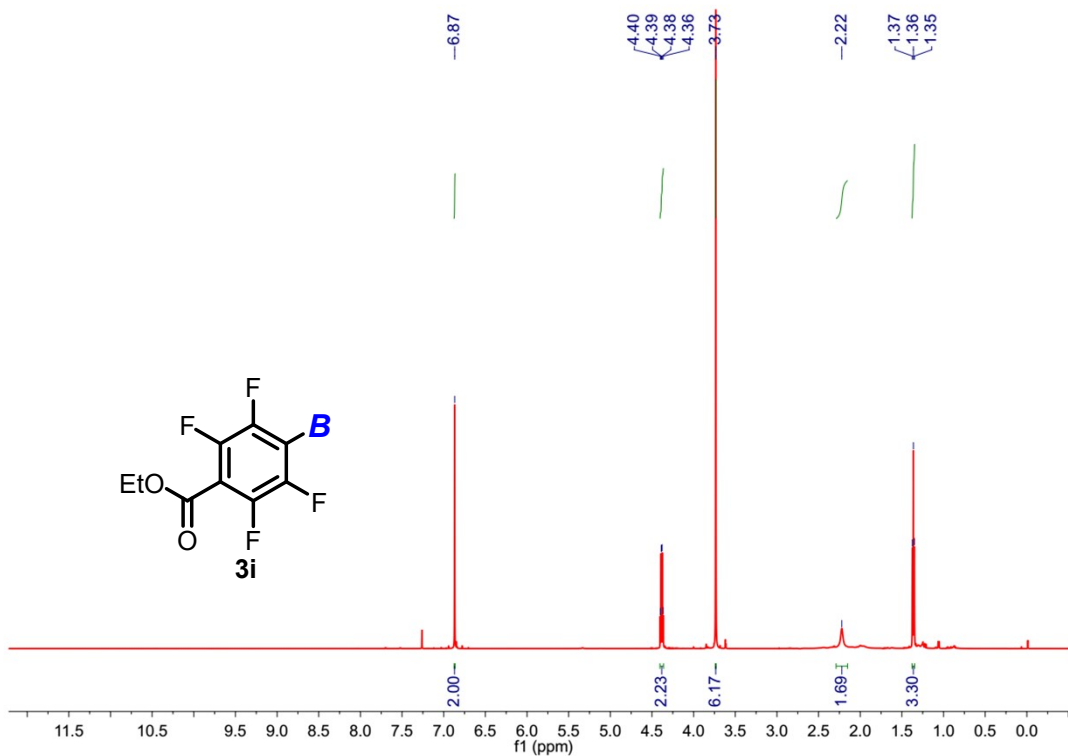

$^1\text{H}\{^{11}\text{B}\}$  NMR (600 MHz,  $\text{CDCl}_3$ )

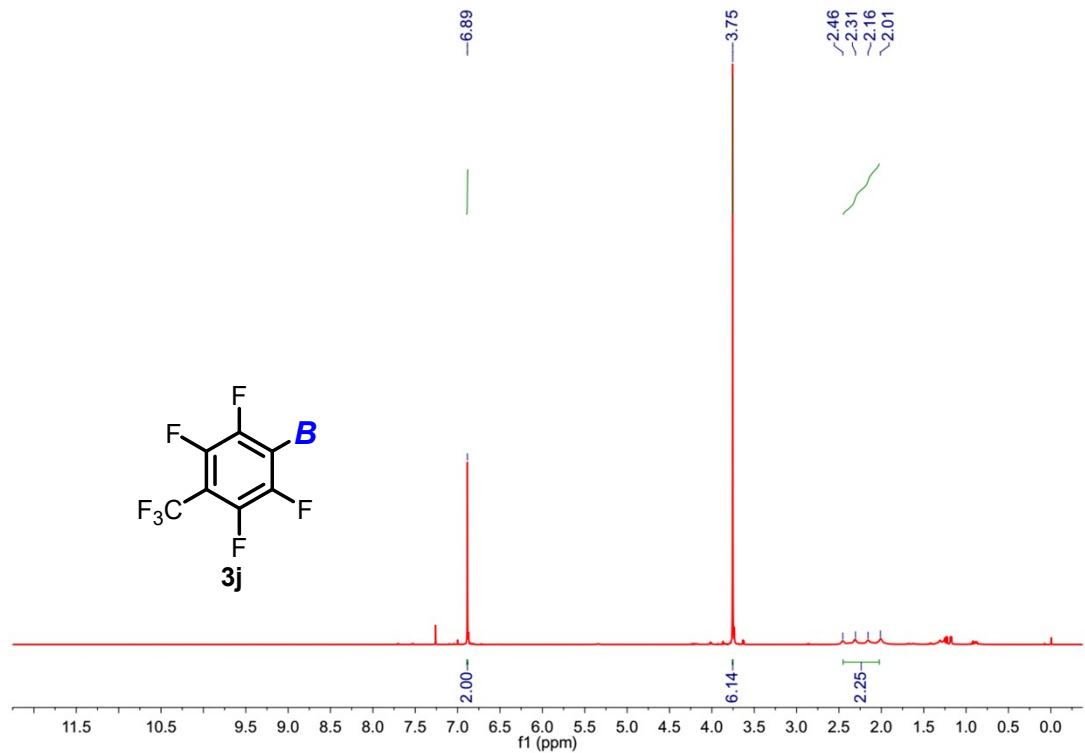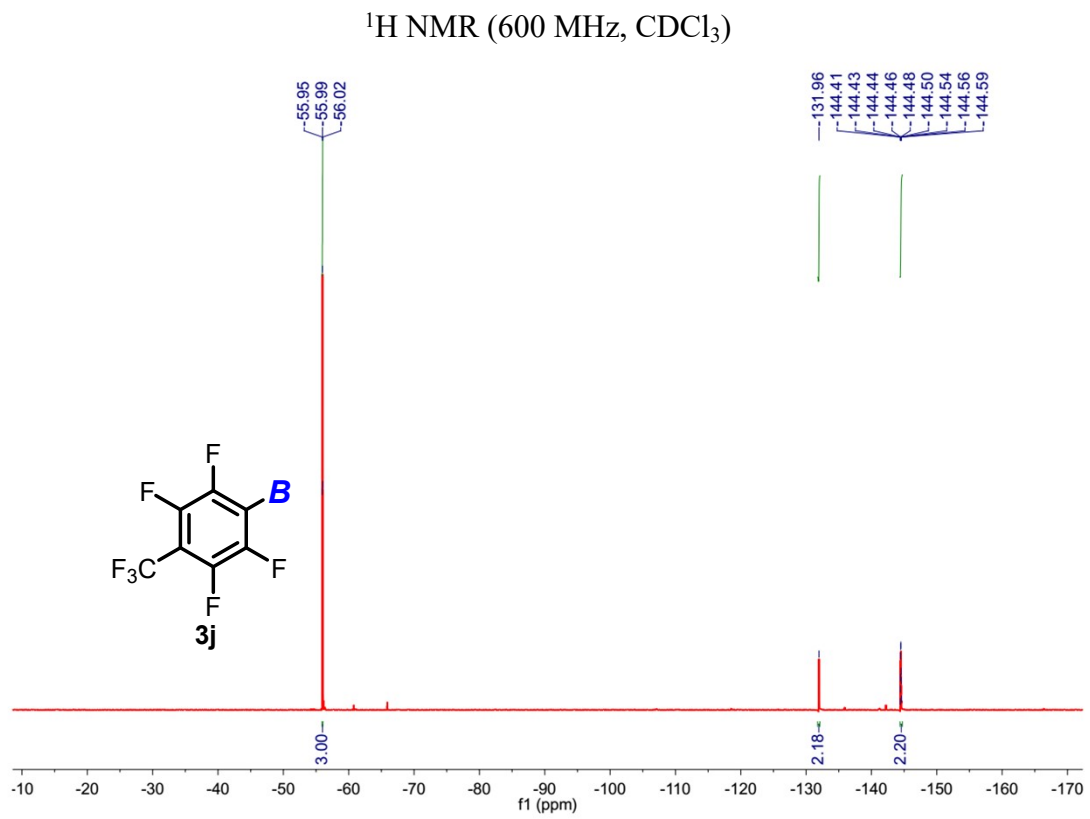



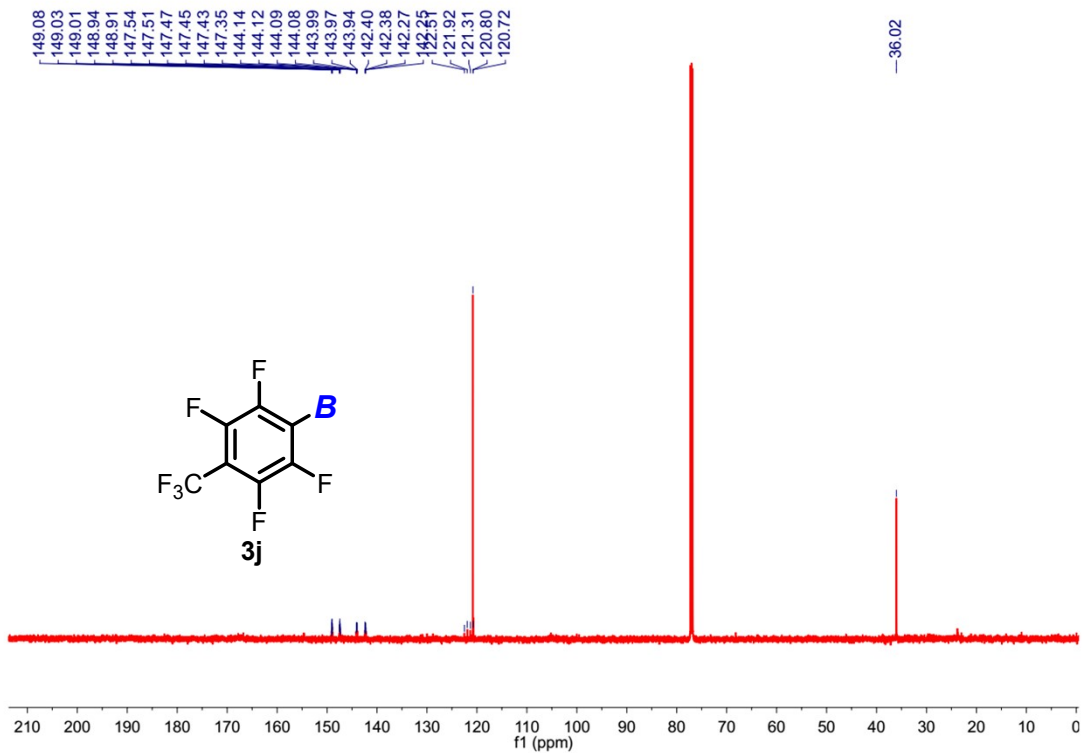

$^{13}\text{C}$  NMR (151 MHz,  $\text{CDCl}_3$ )

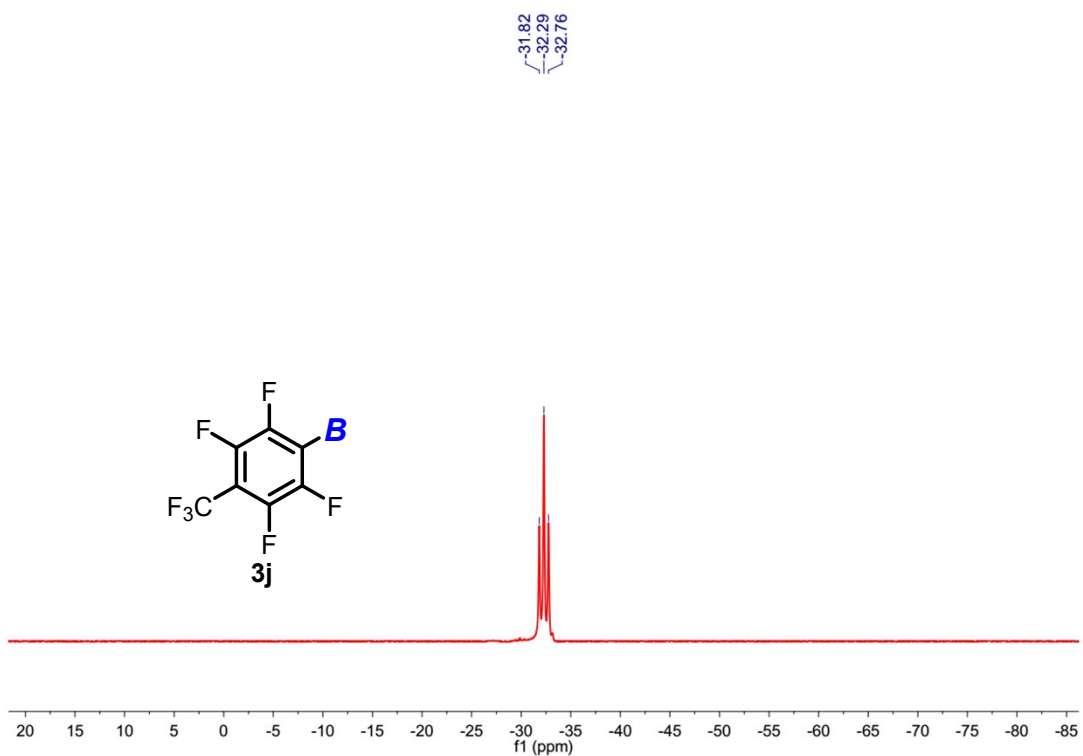

$^{11}\text{B}$  NMR (193 MHz,  $\text{CDCl}_3$ )

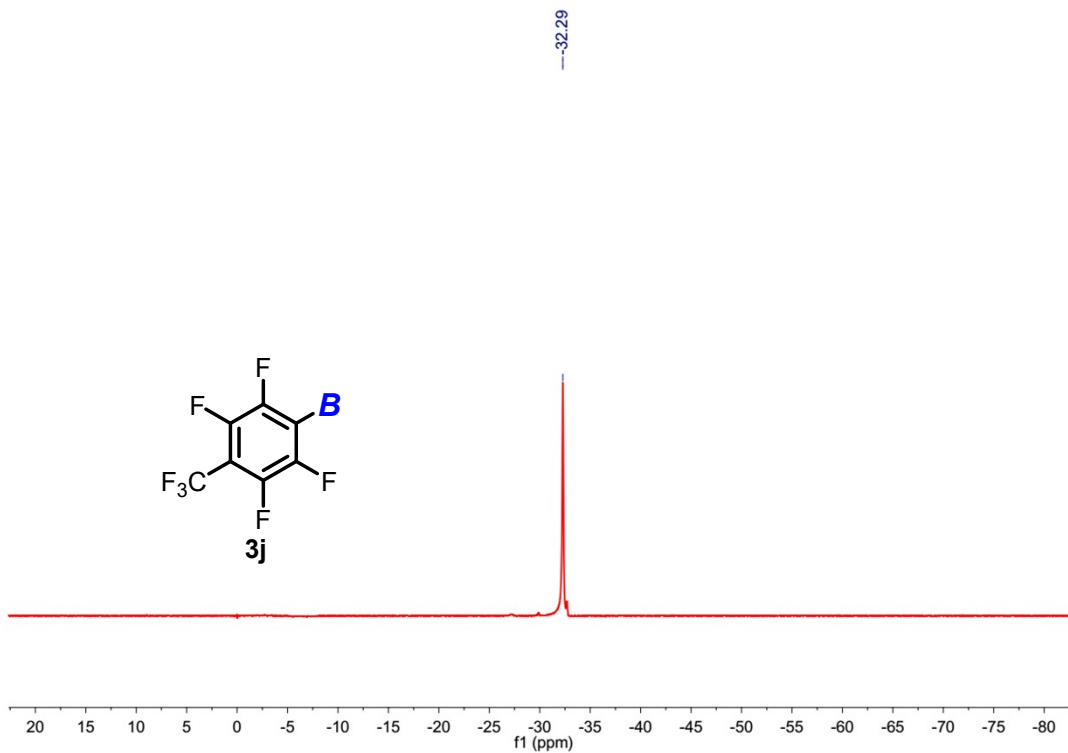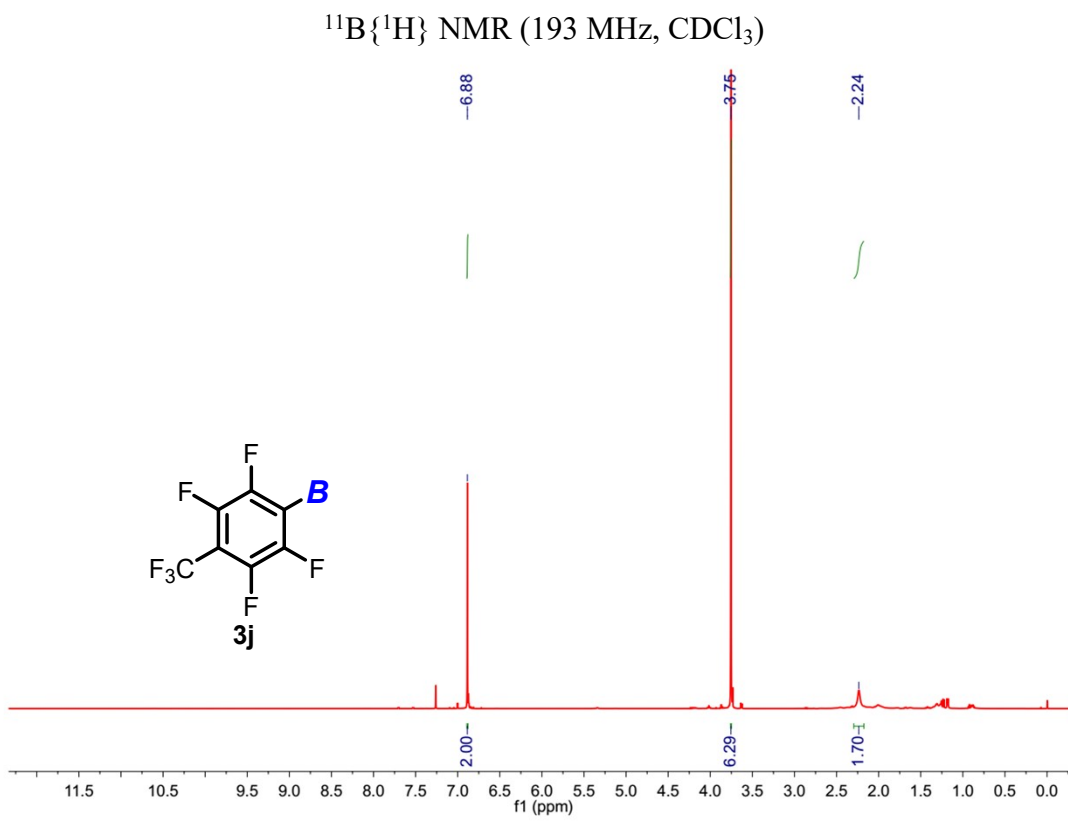

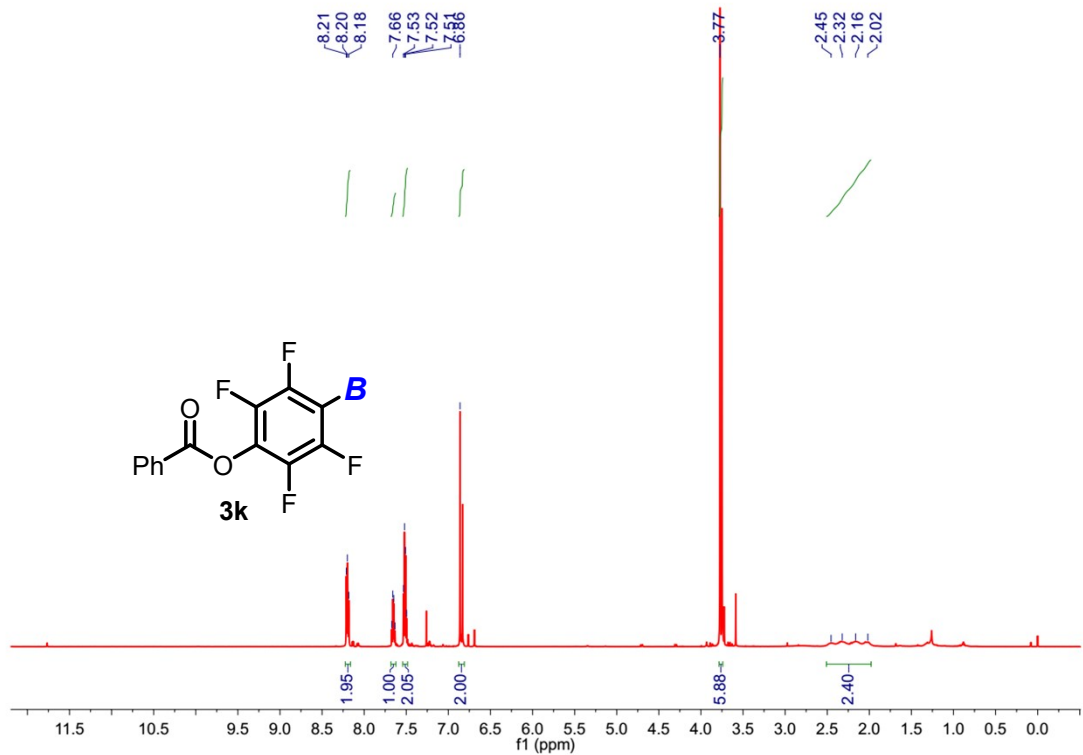

<sup>1</sup>H NMR (600 MHz, CDCl<sub>3</sub>)

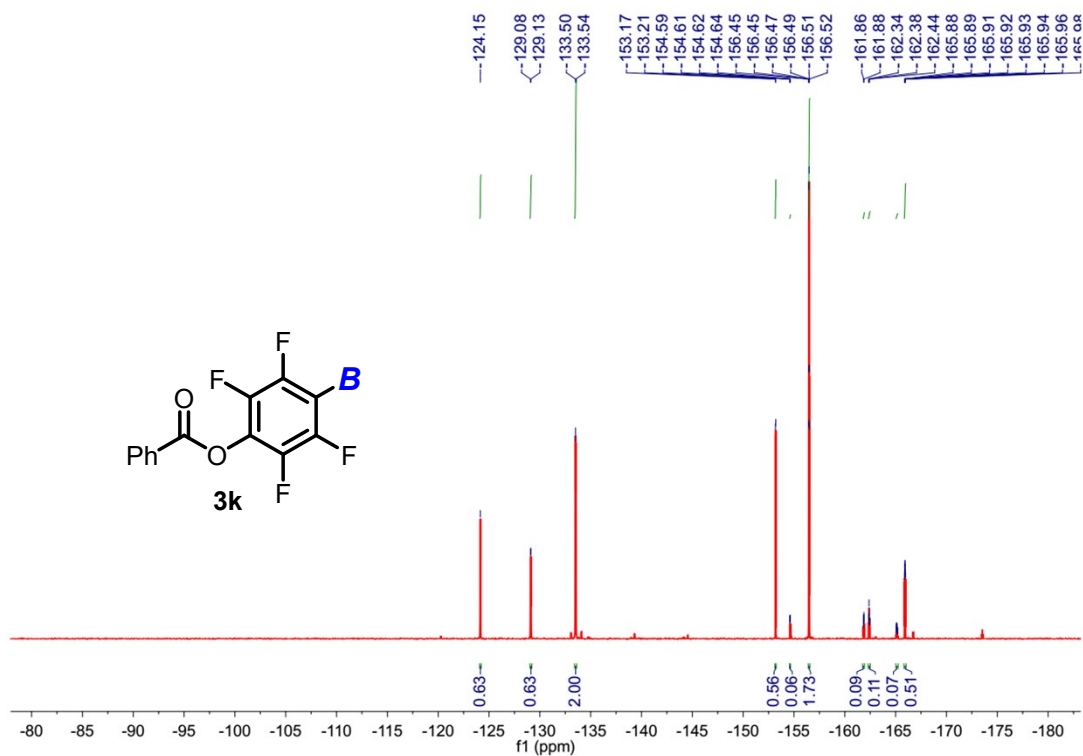

<sup>19</sup>F NMR (565 MHz, CDCl<sub>3</sub>)

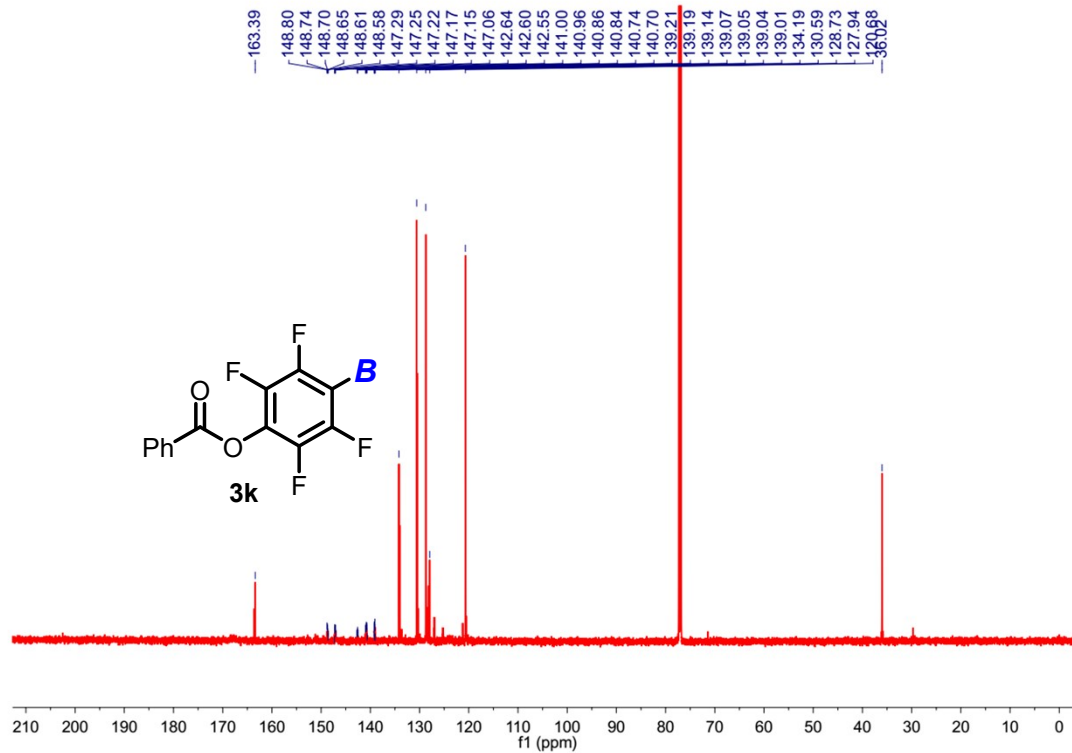

<sup>13</sup>C NMR (151 MHz, CDCl<sub>3</sub>)

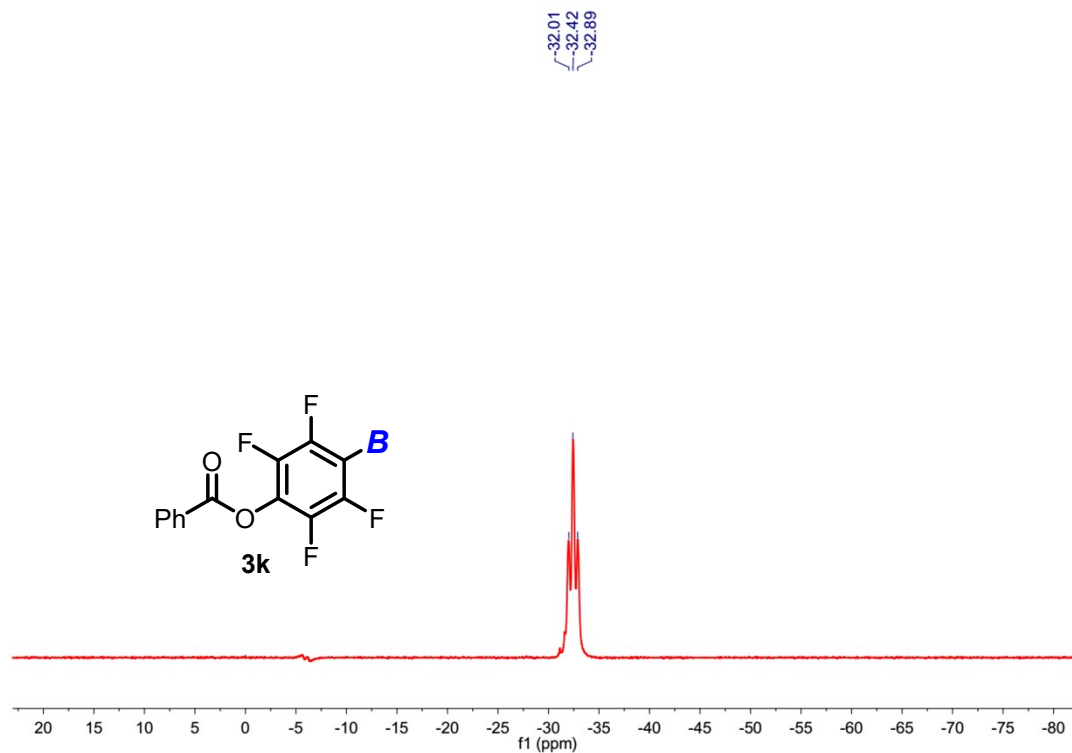

<sup>11</sup>B NMR (193 MHz, CDCl<sub>3</sub>)

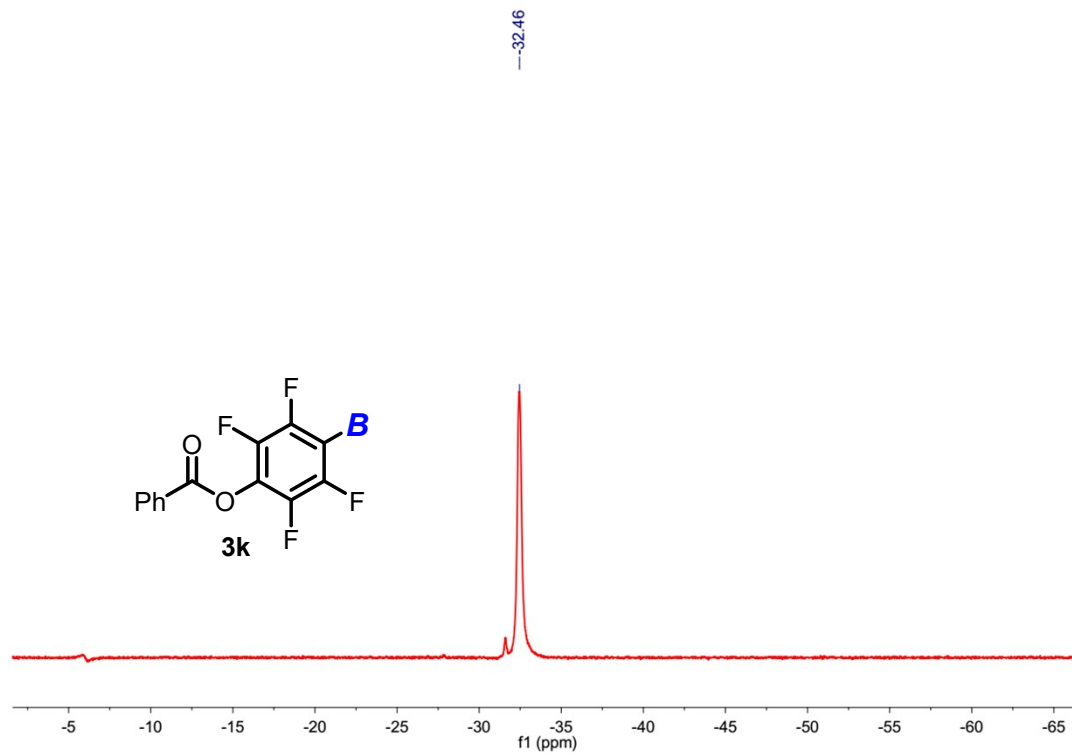

$^{11}\text{B}\{^1\text{H}\}$  NMR (193 MHz,  $\text{CDCl}_3$ )

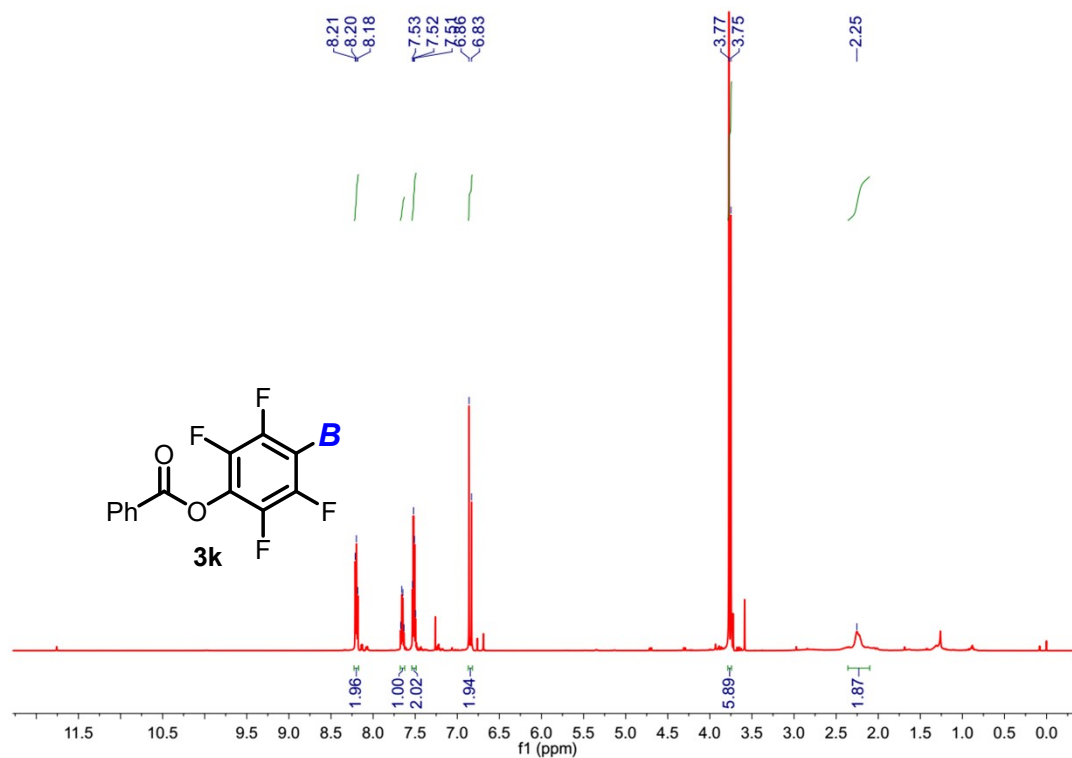

$^1\text{H}\{^{11}\text{B}\}$  NMR (600 MHz,  $\text{CDCl}_3$ )

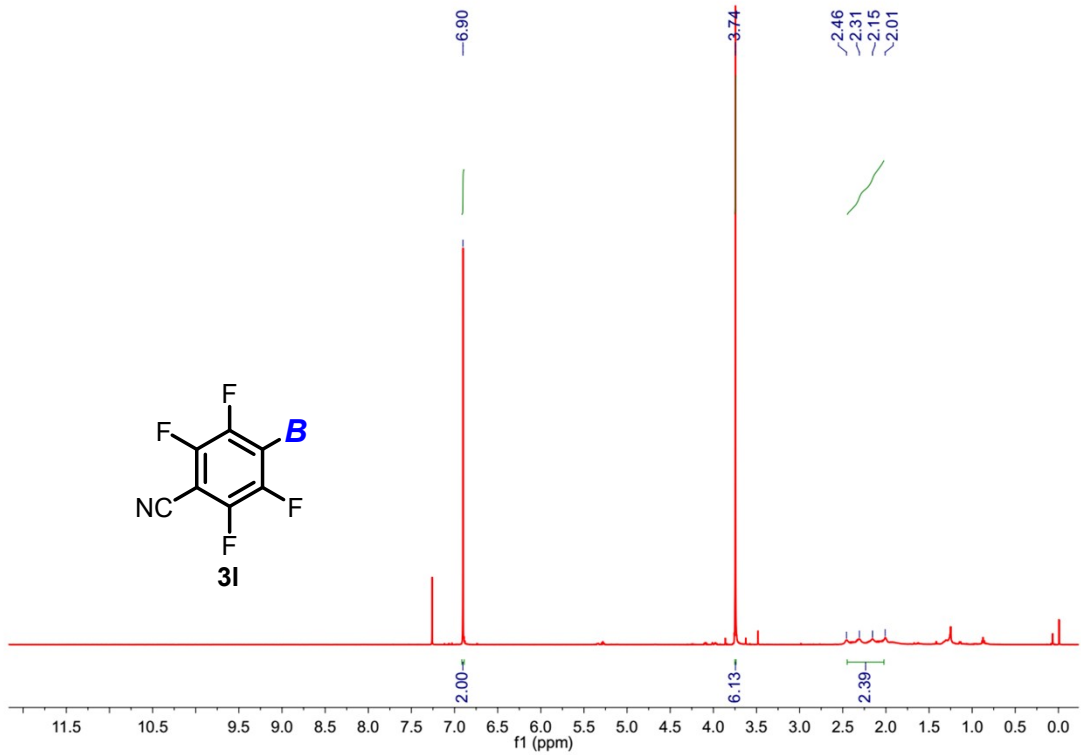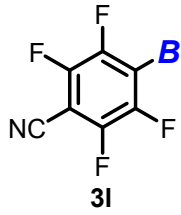

**<sup>1</sup>H NMR (600 MHz, CDCl<sub>3</sub>)**

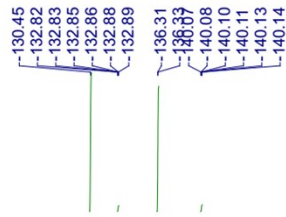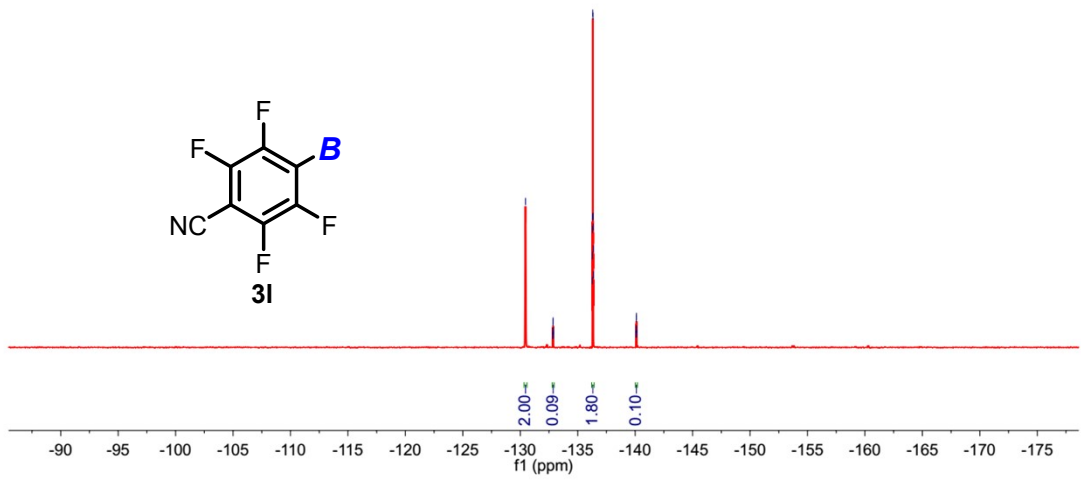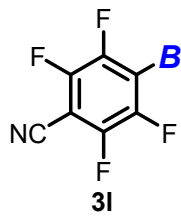

**<sup>19</sup>F NMR (565 MHz, CDCl<sub>3</sub>)**

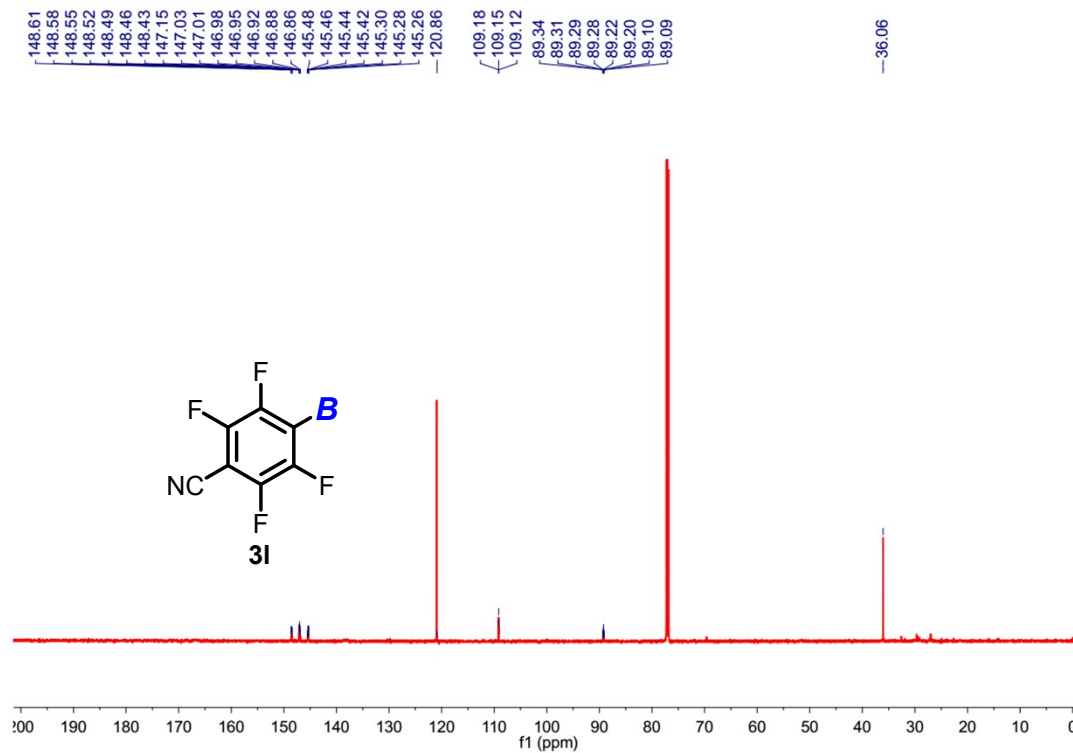

<sup>13</sup>C NMR (151 MHz, CDCl<sub>3</sub>)

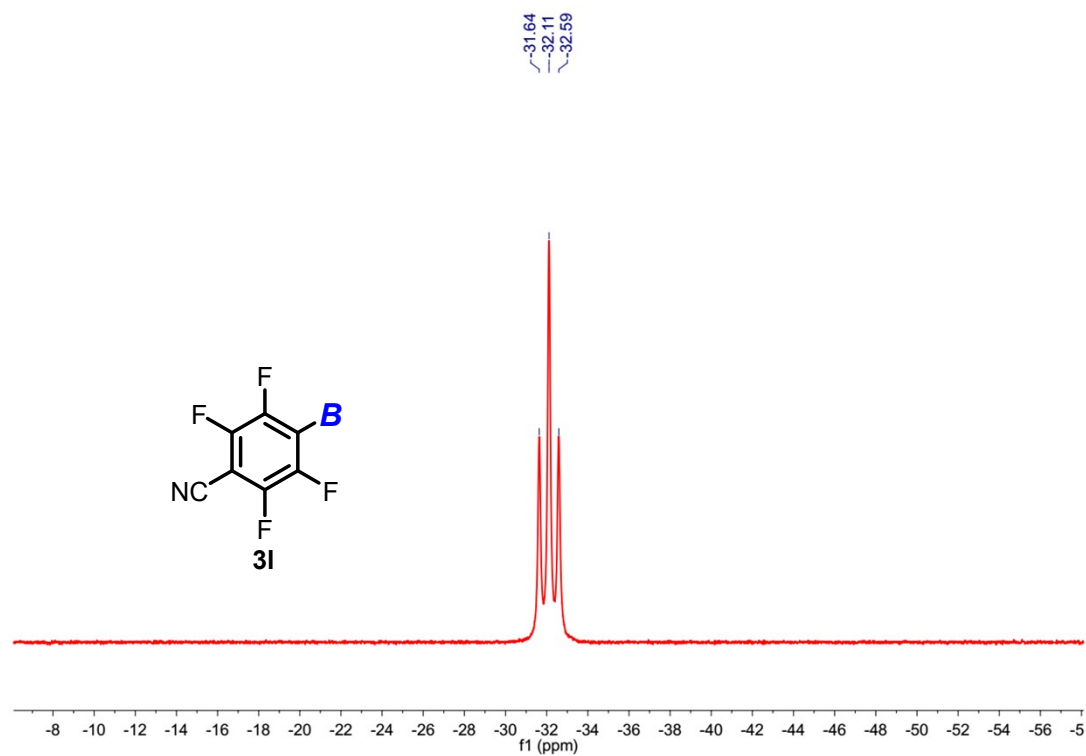

<sup>11</sup>B NMR (193 MHz, CDCl<sub>3</sub>)

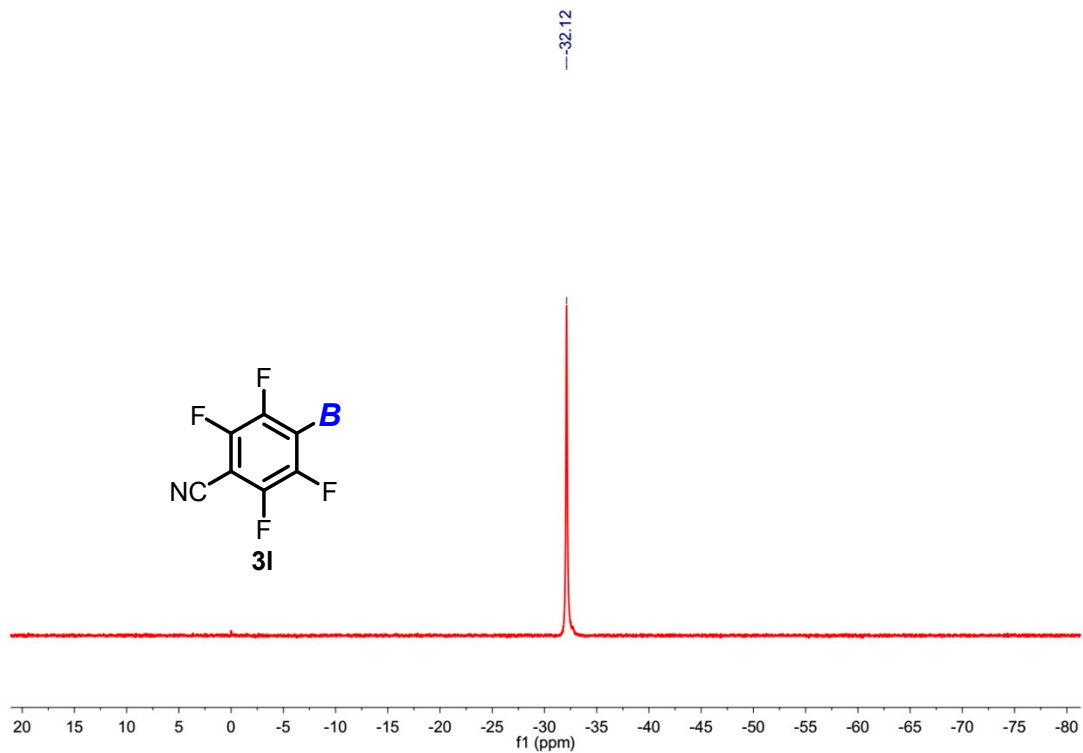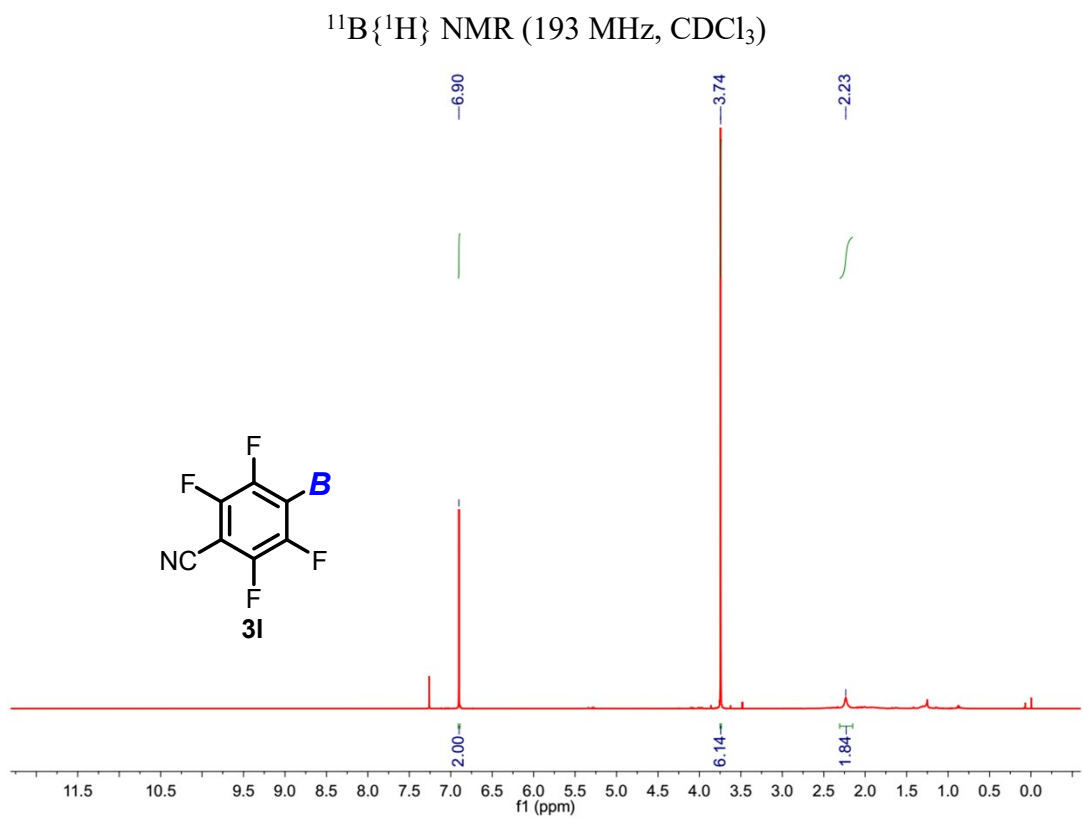

$^1\text{H}\{^{11}\text{B}\}$  NMR (600 MHz,  $\text{CDCl}_3$ )



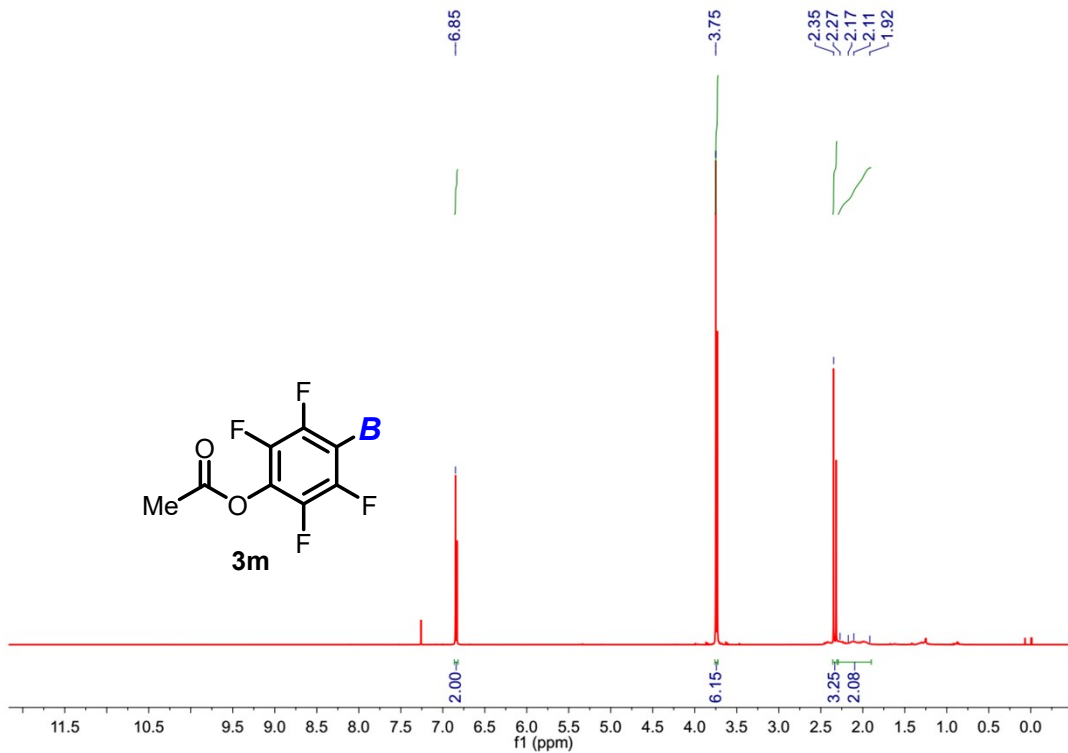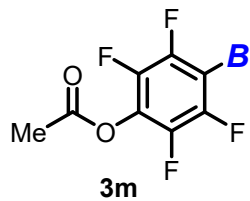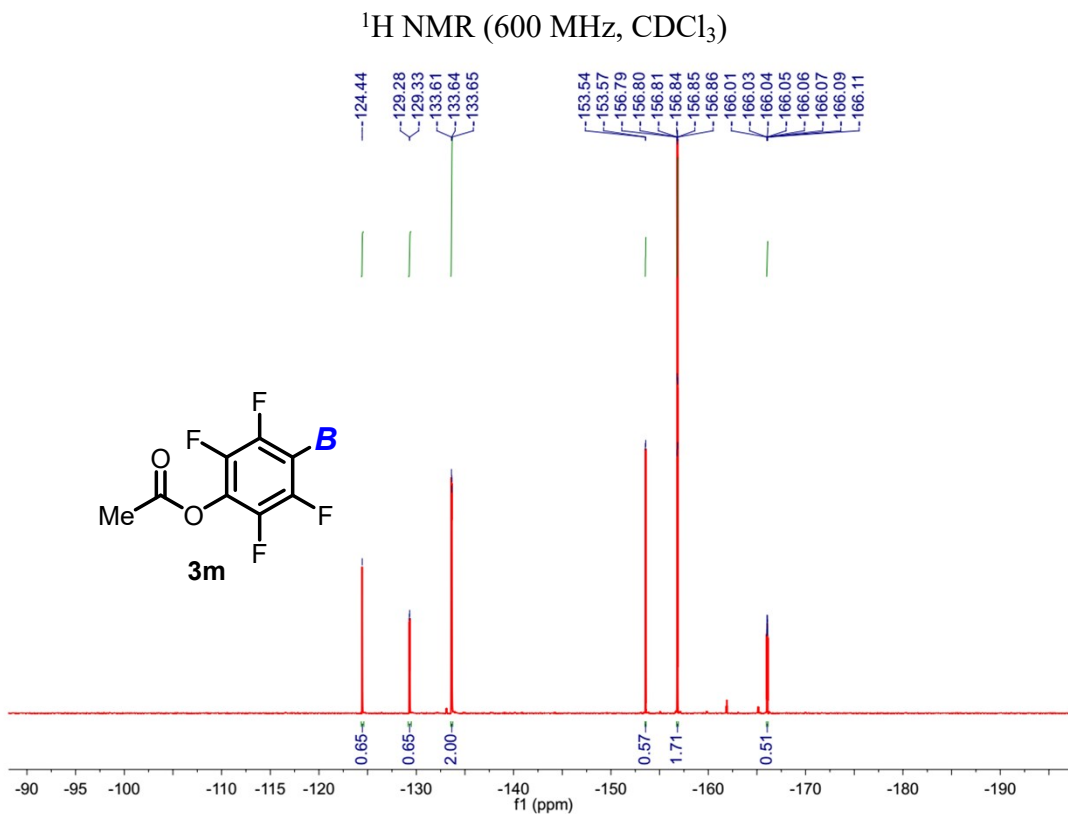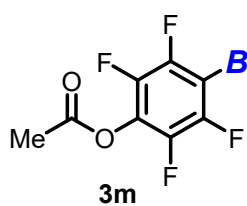

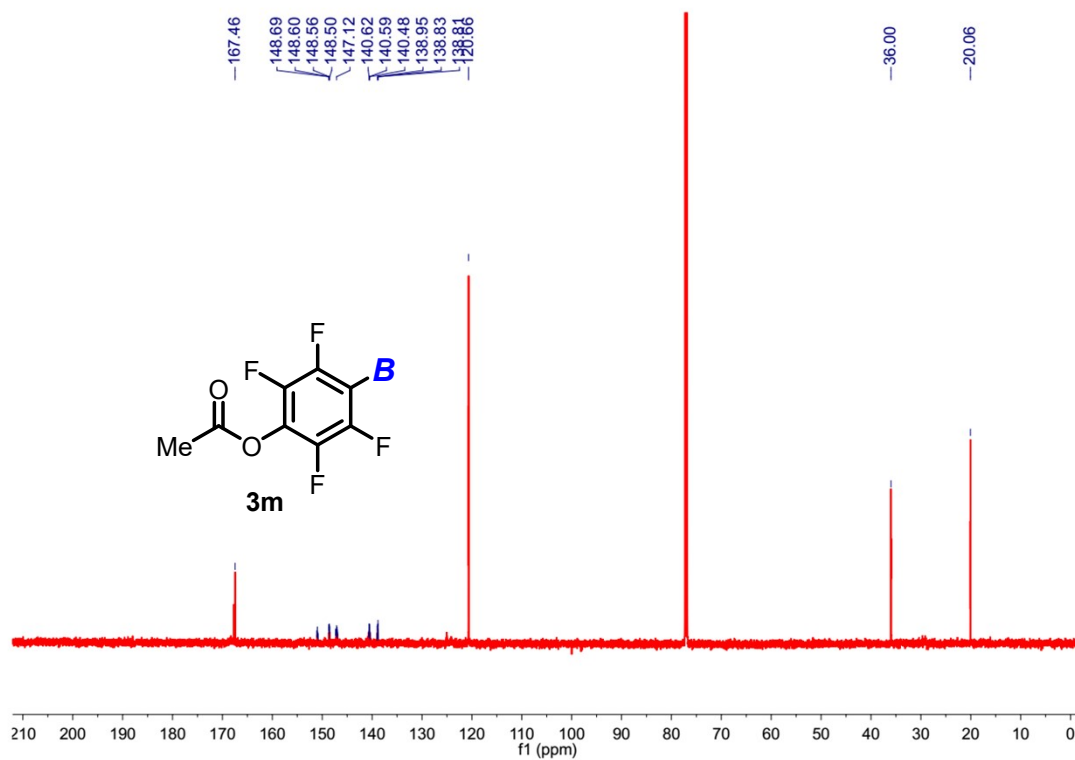

$^{13}\text{C}$  NMR (151 MHz,  $\text{CDCl}_3$ )

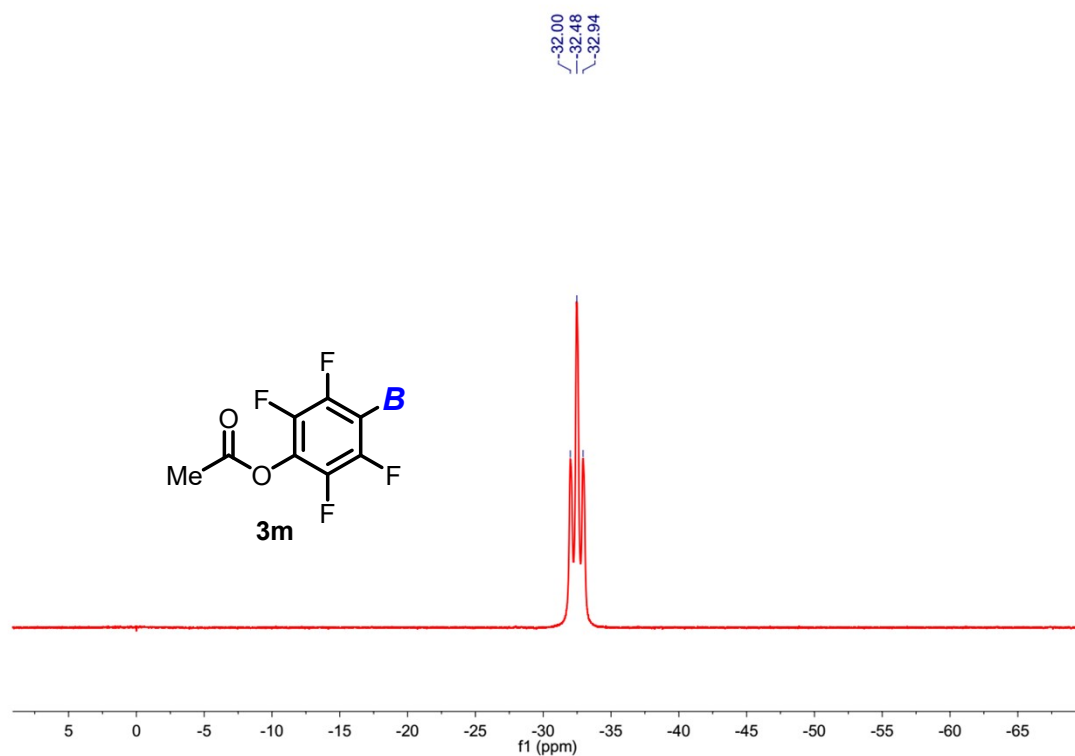

$^{11}\text{B}$  NMR (193 MHz,  $\text{CDCl}_3$ )

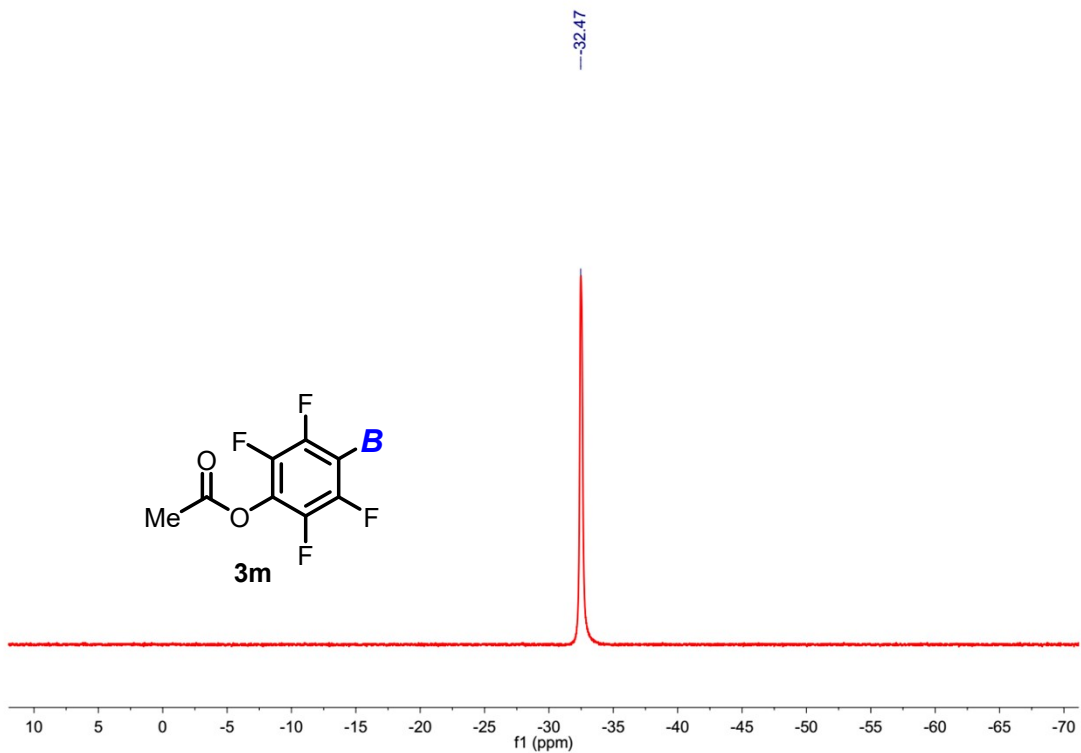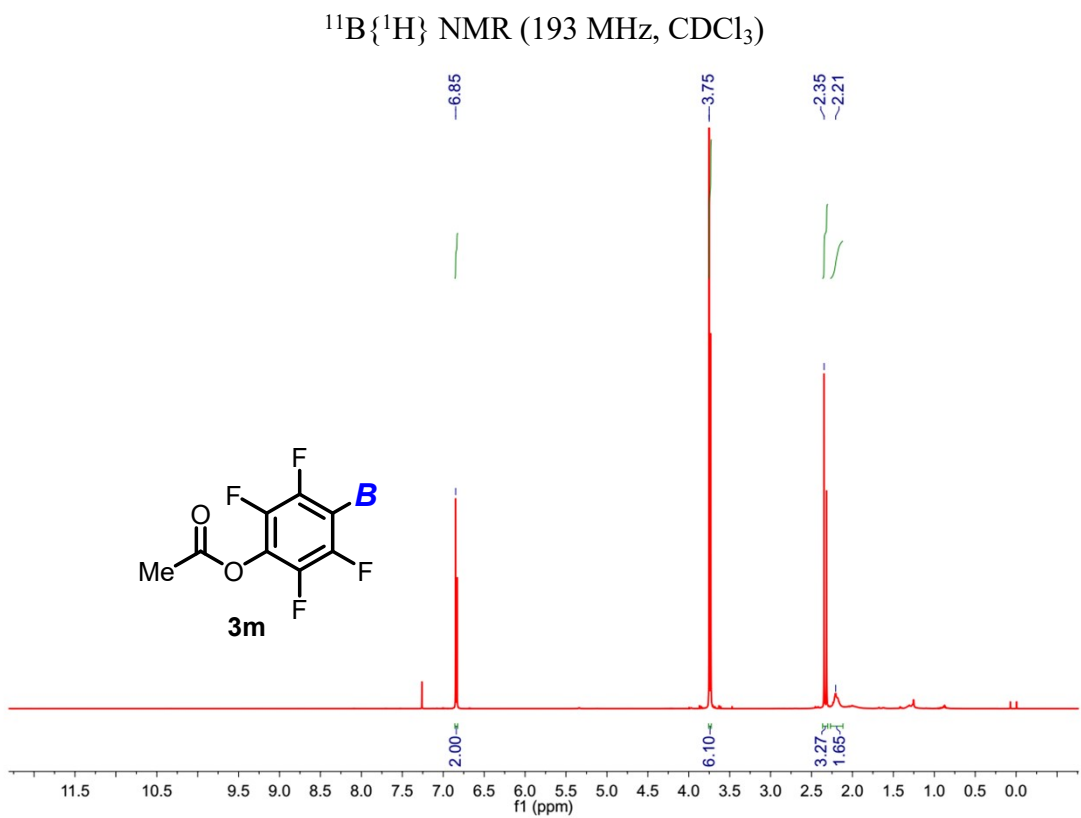

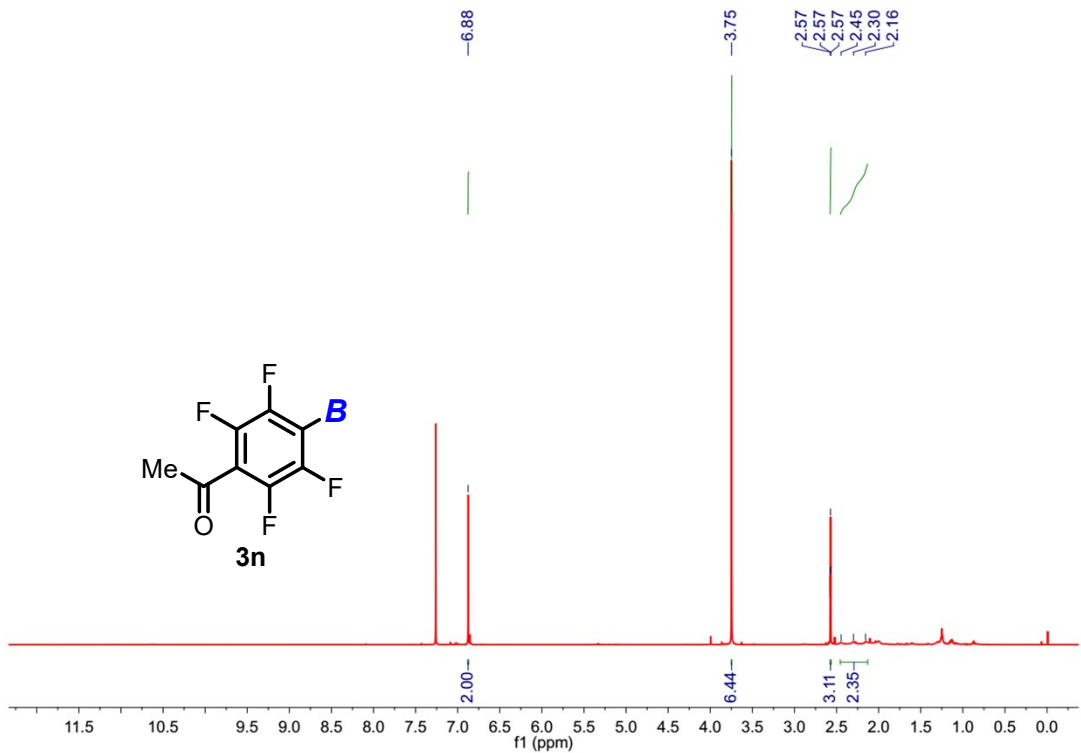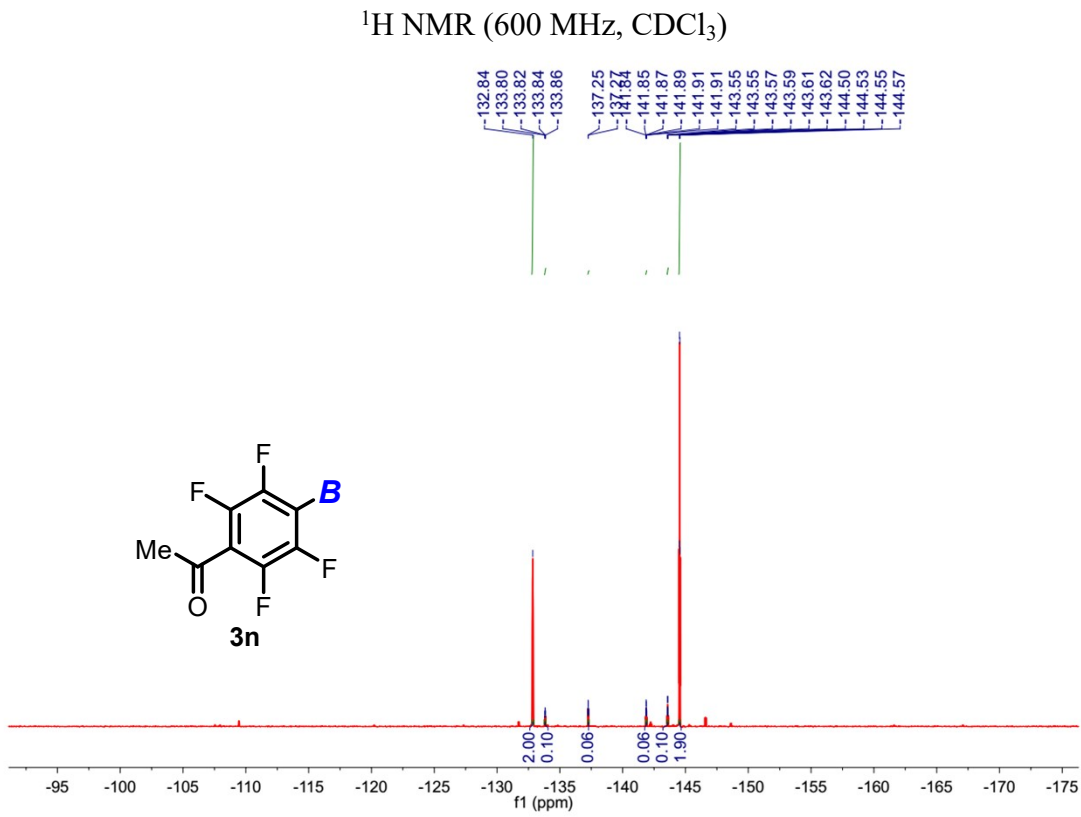

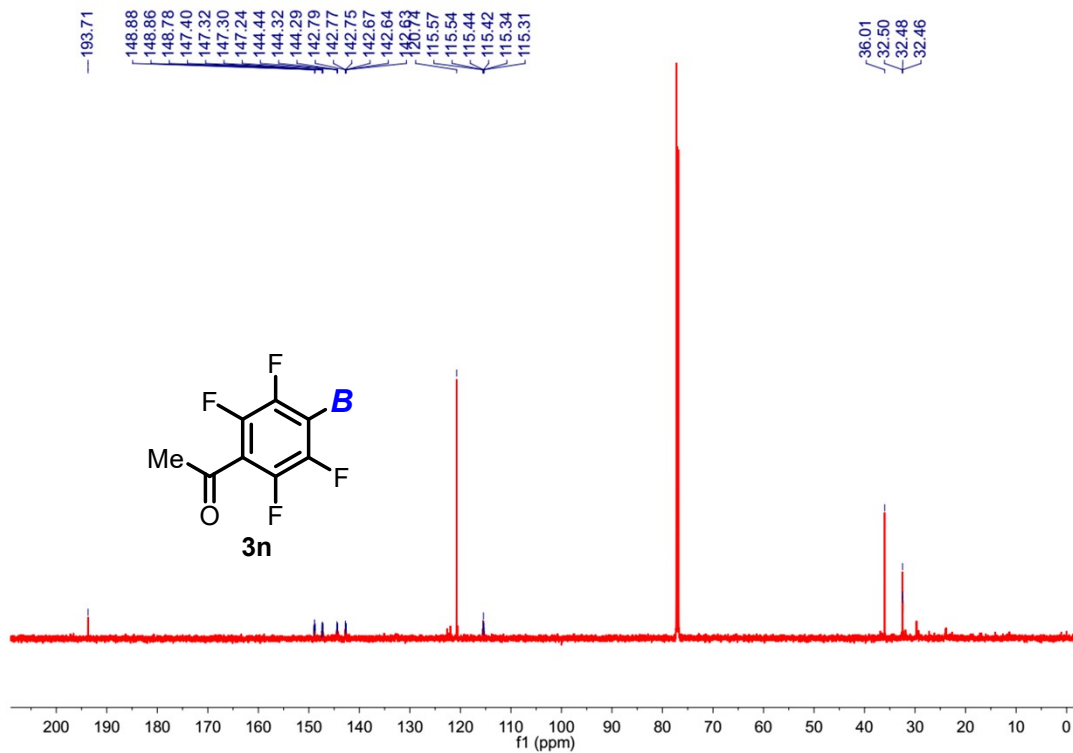

$^{13}\text{C}$  NMR (151 MHz,  $\text{CDCl}_3$ )

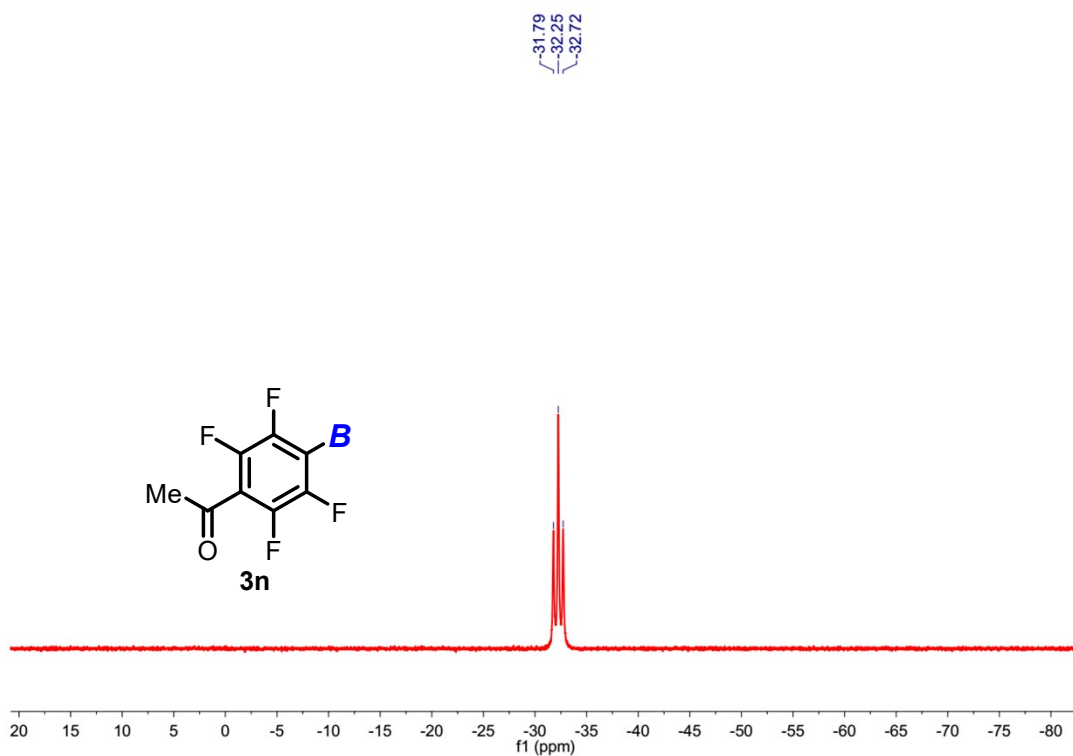

$^{11}\text{B}$  NMR (193 MHz,  $\text{CDCl}_3$ )

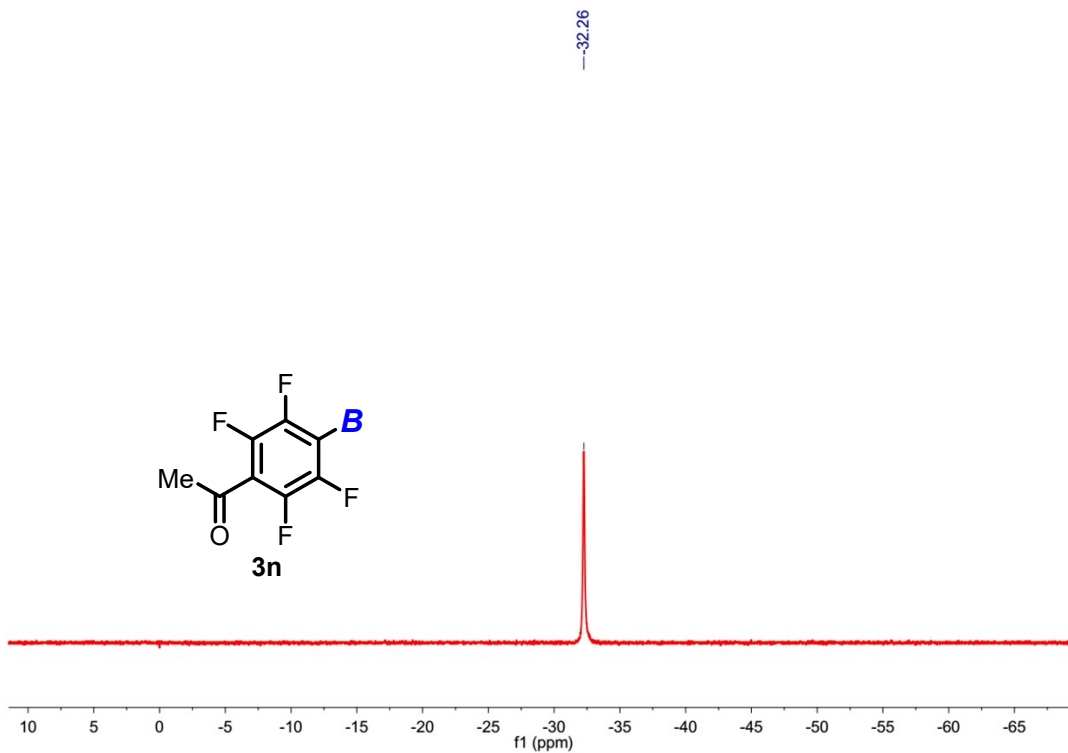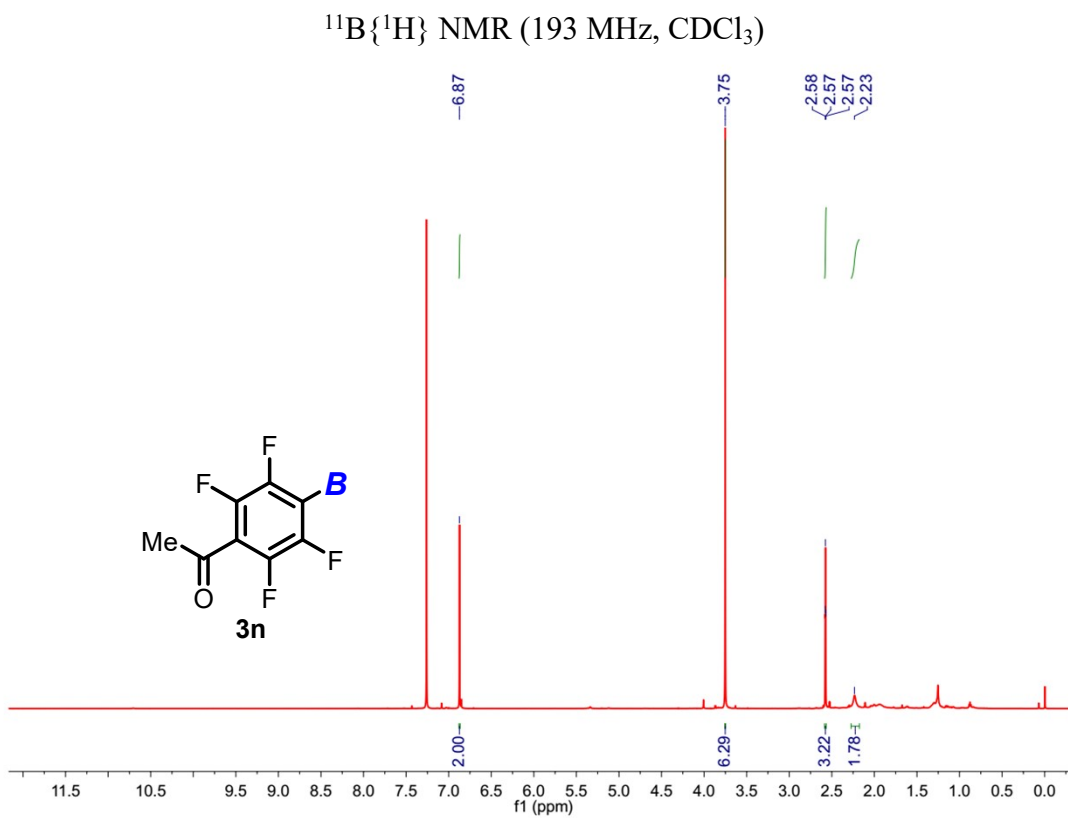

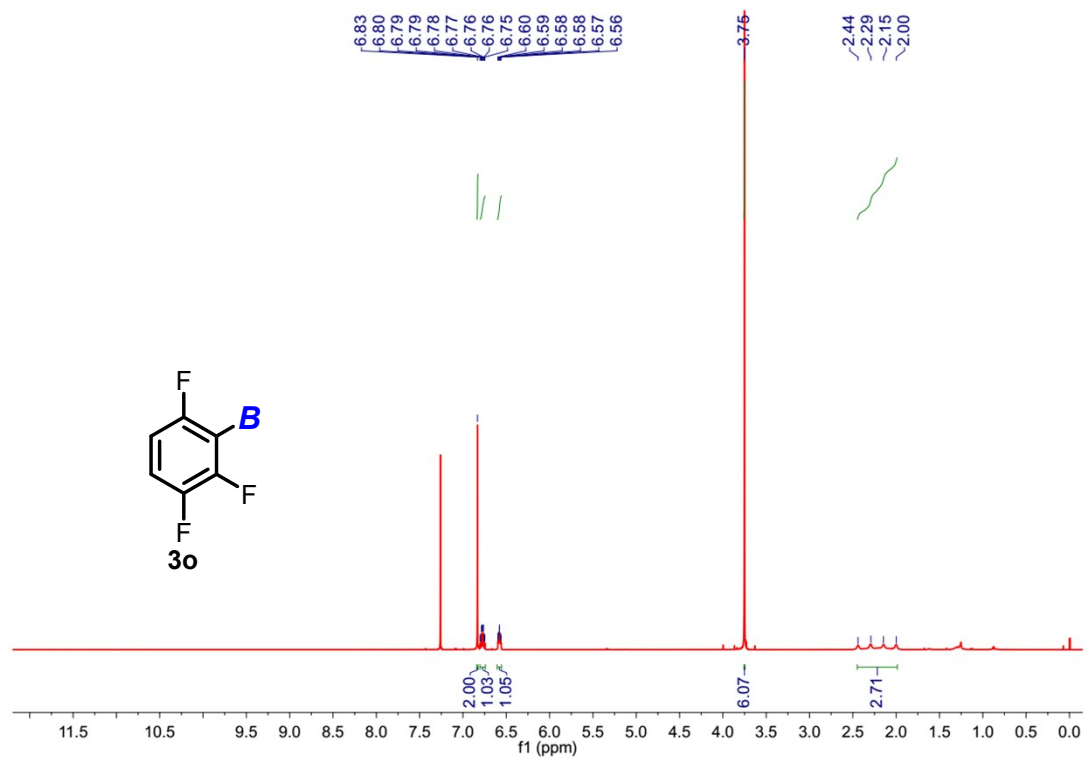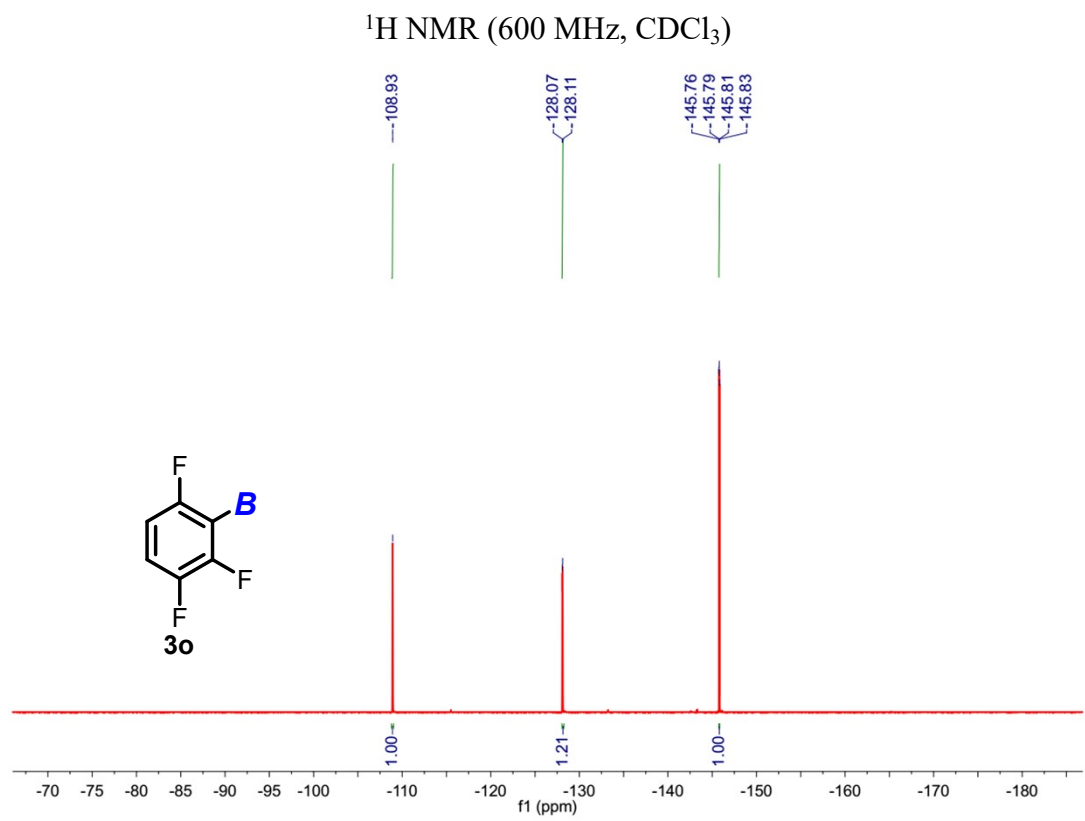

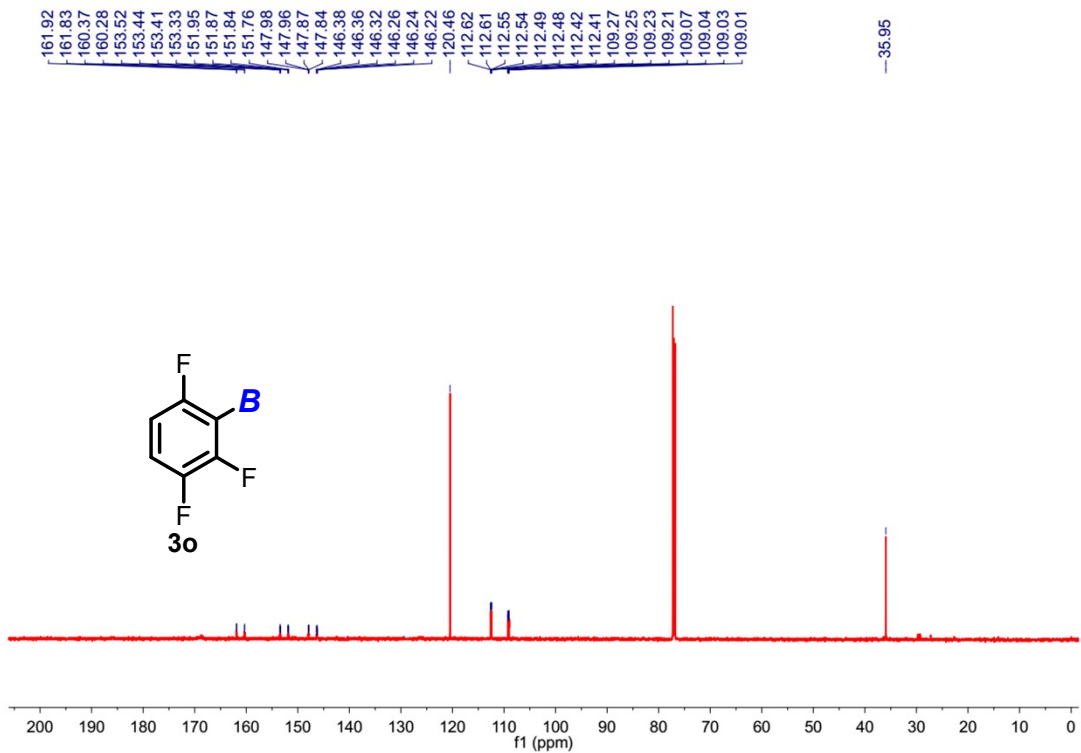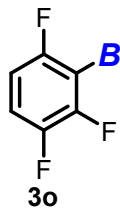

$^{13}\text{C}$  NMR (151 MHz,  $\text{CDCl}_3$ )

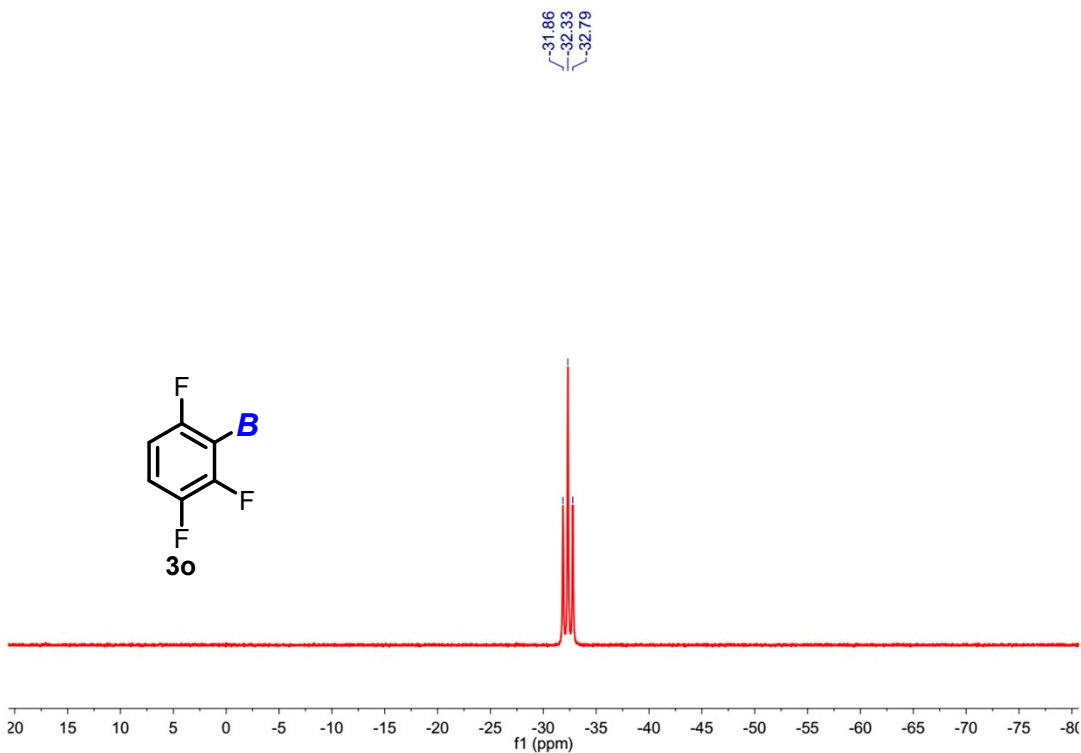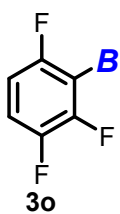

$^{11}\text{B}$  NMR (193 MHz,  $\text{CDCl}_3$ )



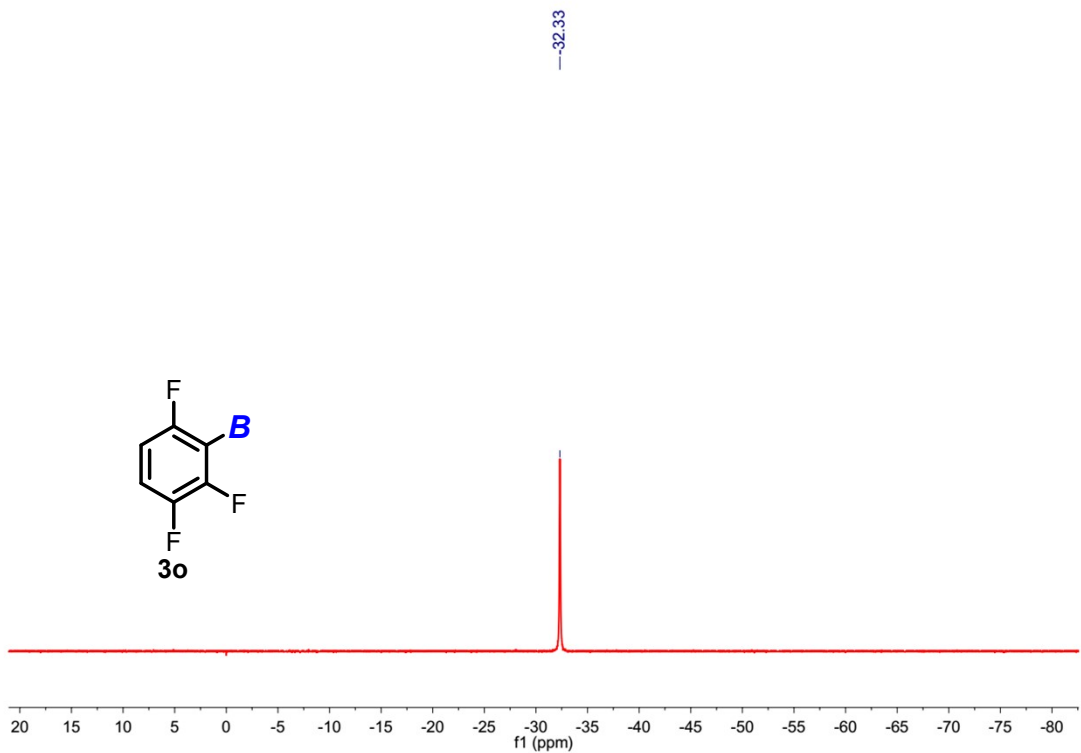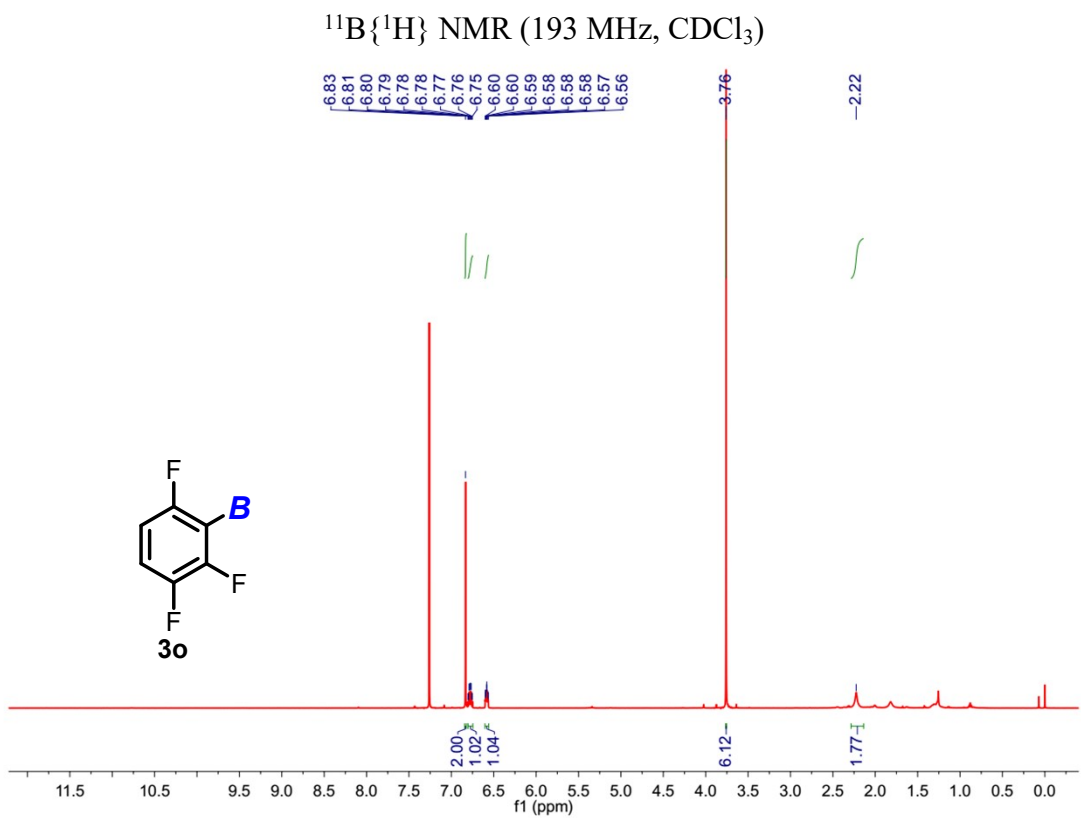

$^1\text{H}\{^{11}\text{B}\}$  NMR (600 MHz,  $\text{CDCl}_3$ )

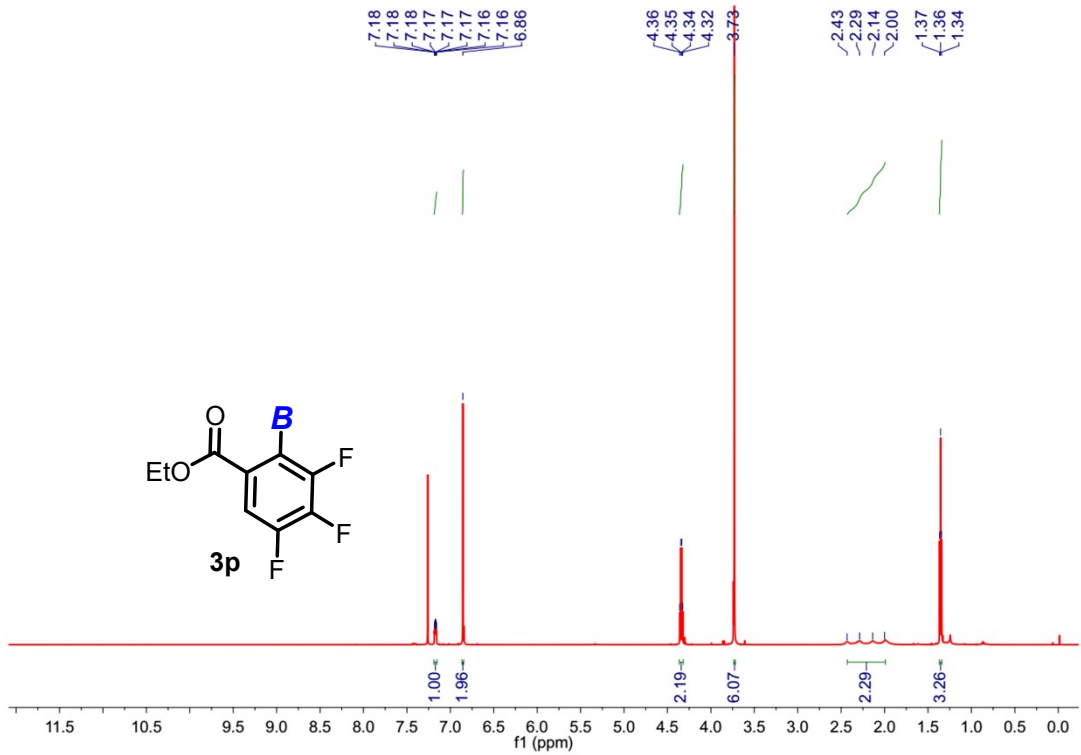

<sup>1</sup>H NMR (600 MHz, CDCl<sub>3</sub>)

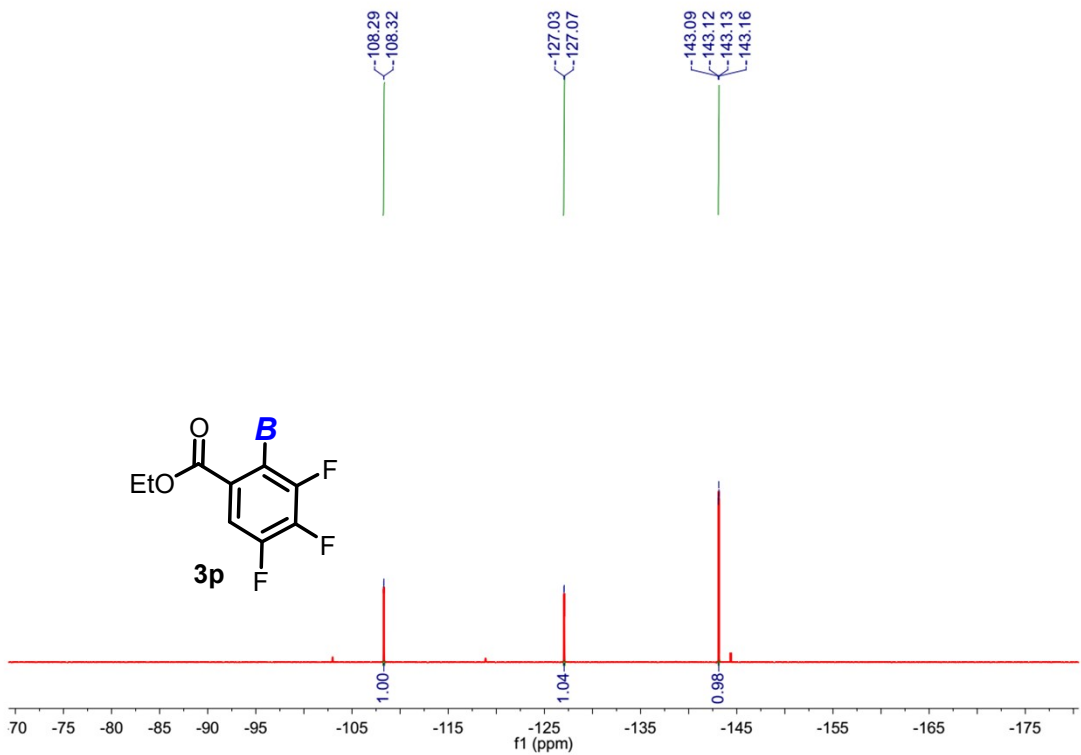

<sup>19</sup>F NMR (565 MHz, CDCl<sub>3</sub>)

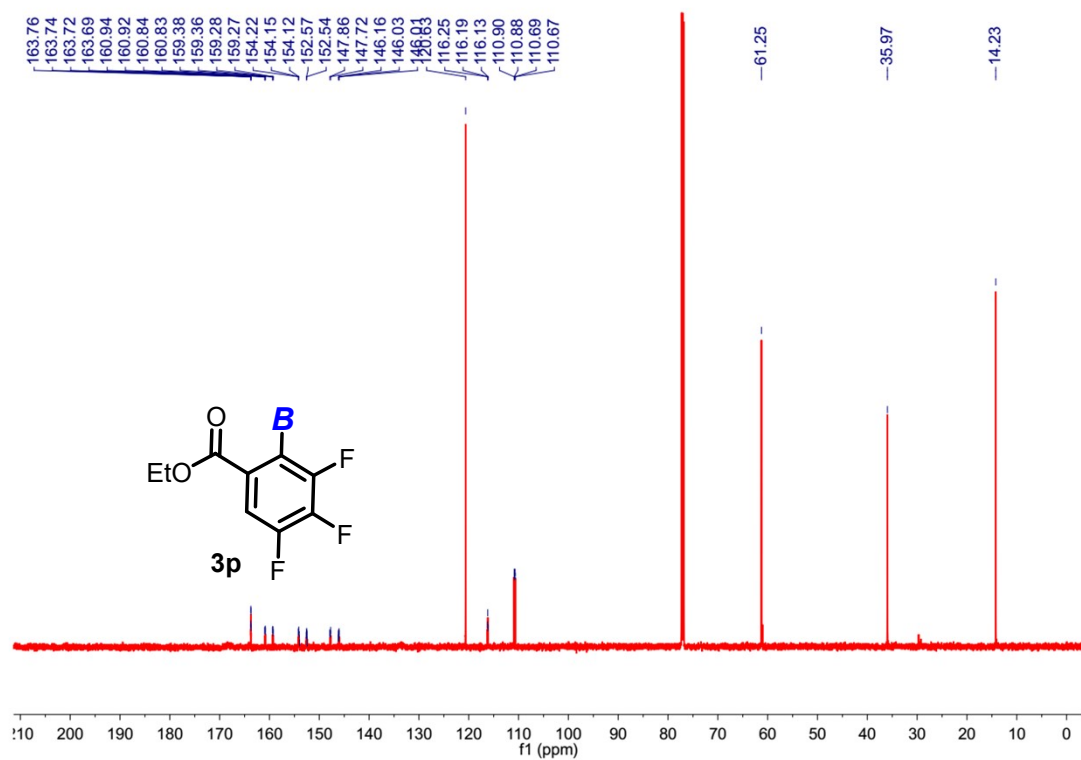

<sup>13</sup>C NMR (151 MHz, CDCl<sub>3</sub>)

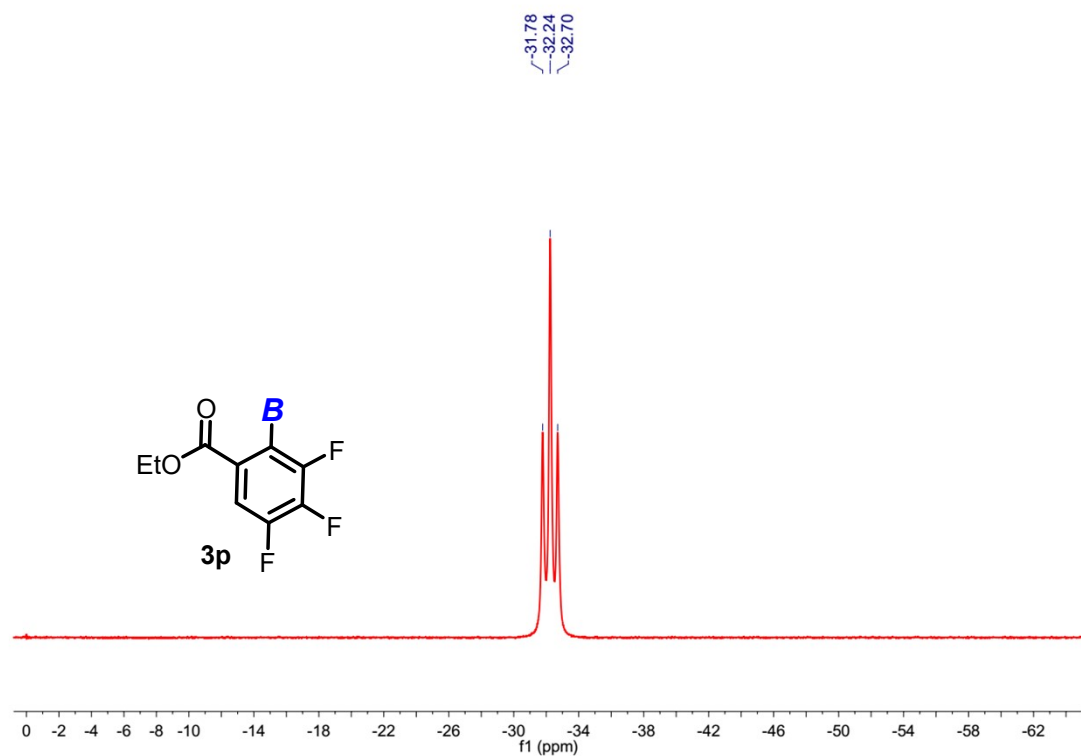

<sup>11</sup>B NMR (193 MHz, CDCl<sub>3</sub>)

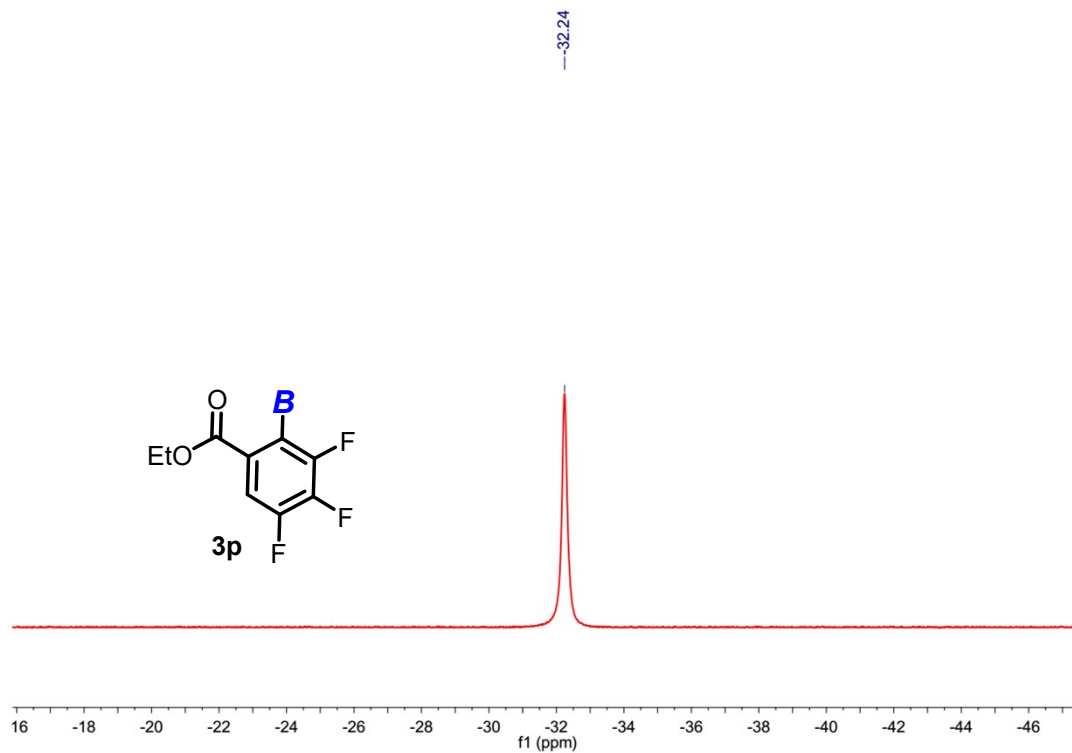

$^{11}\text{B}\{^1\text{H}\}$  NMR (193 MHz,  $\text{CDCl}_3$ )

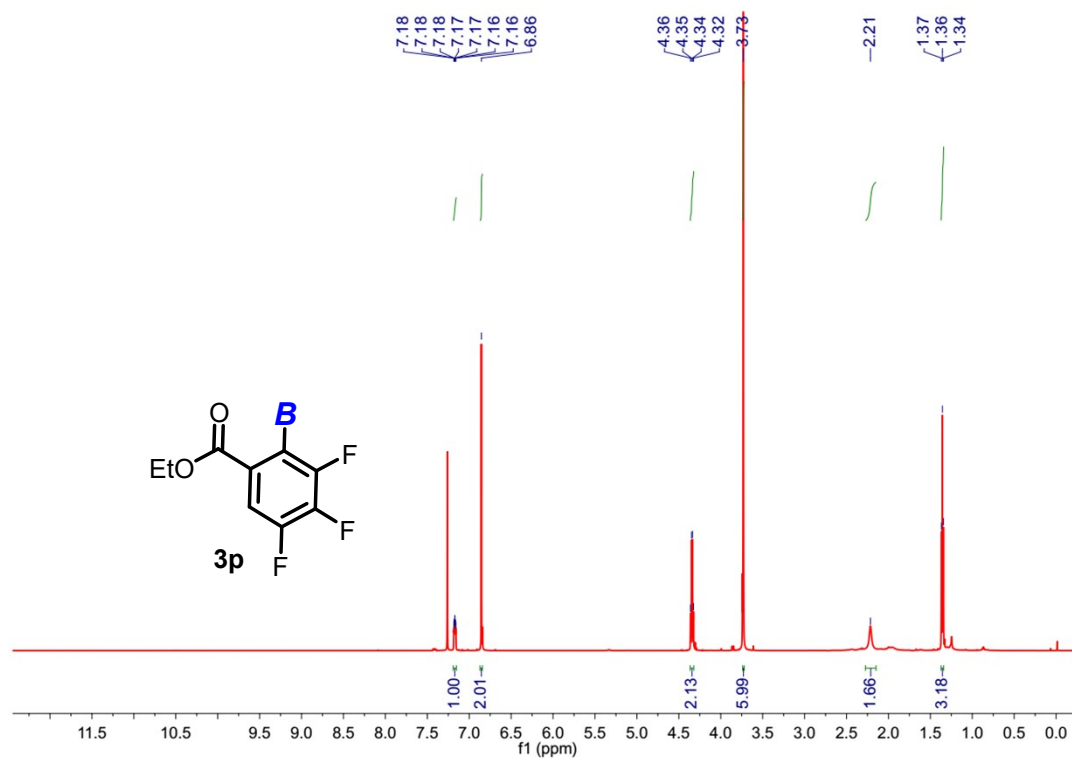

$^1\text{H}\{^{11}\text{B}\}$  NMR (600 MHz,  $\text{CDCl}_3$ )

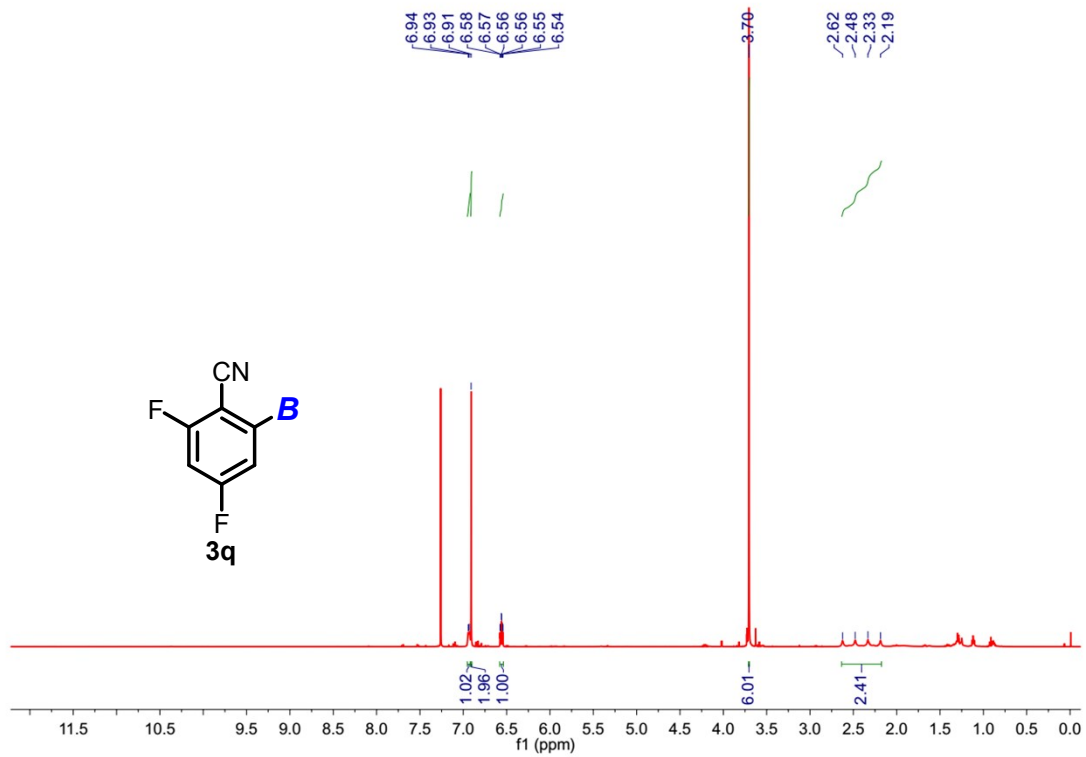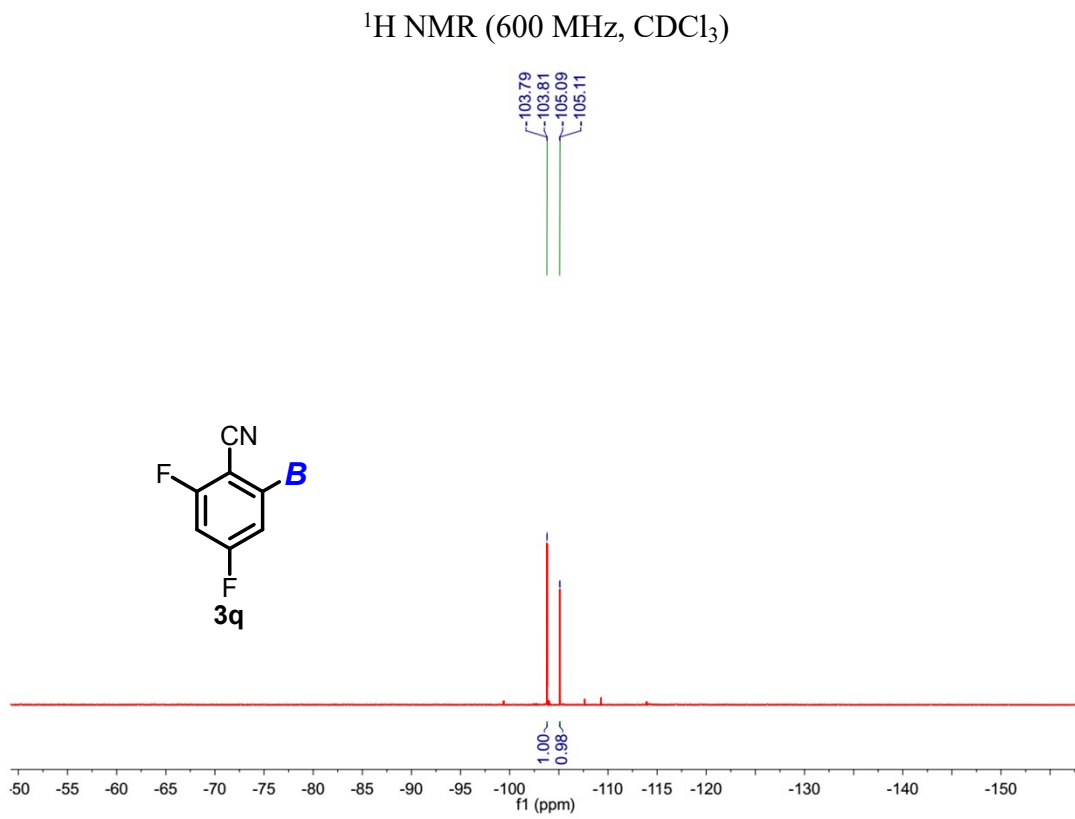

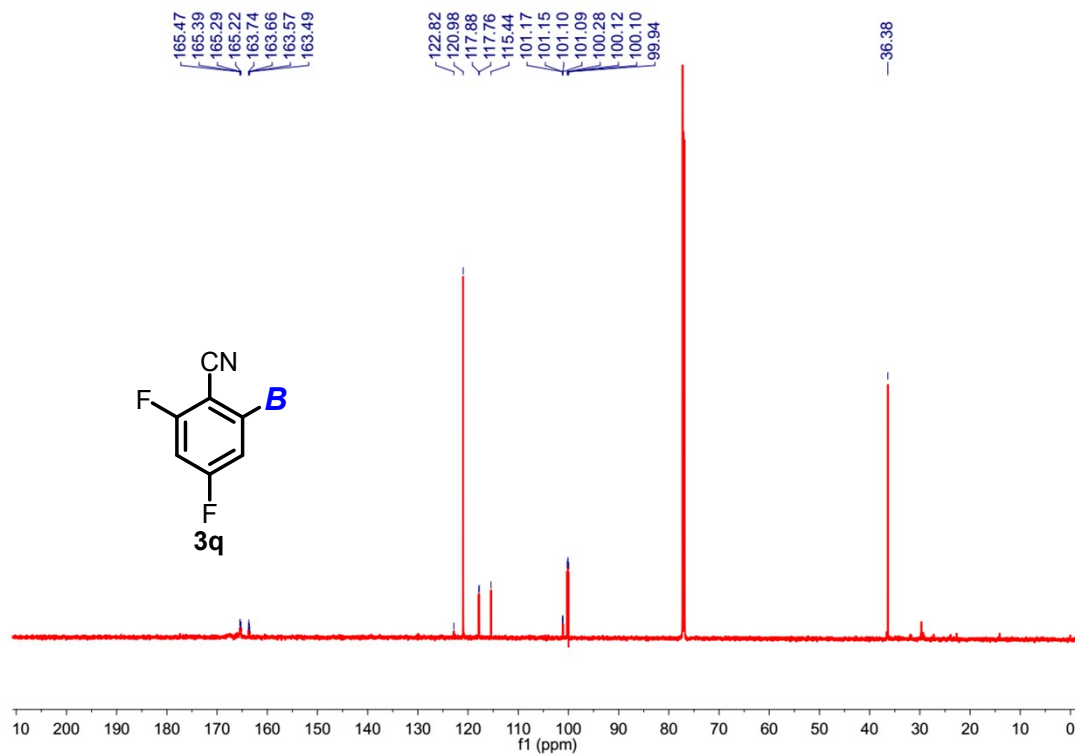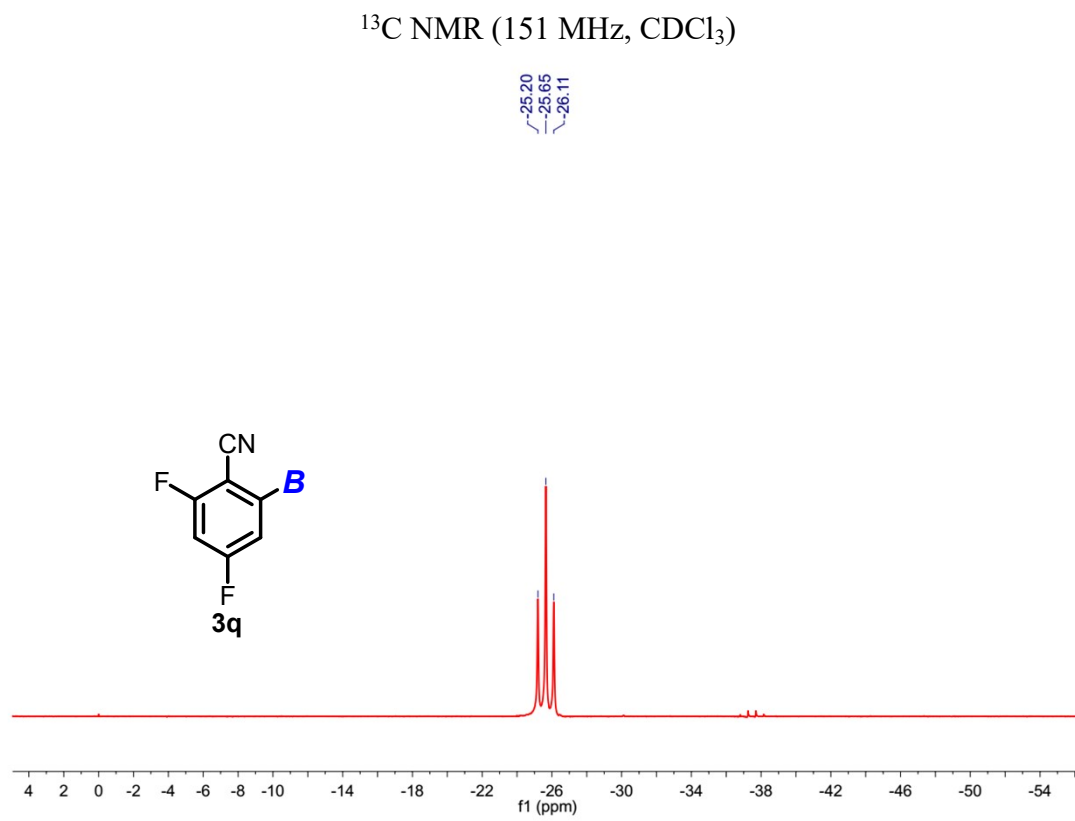

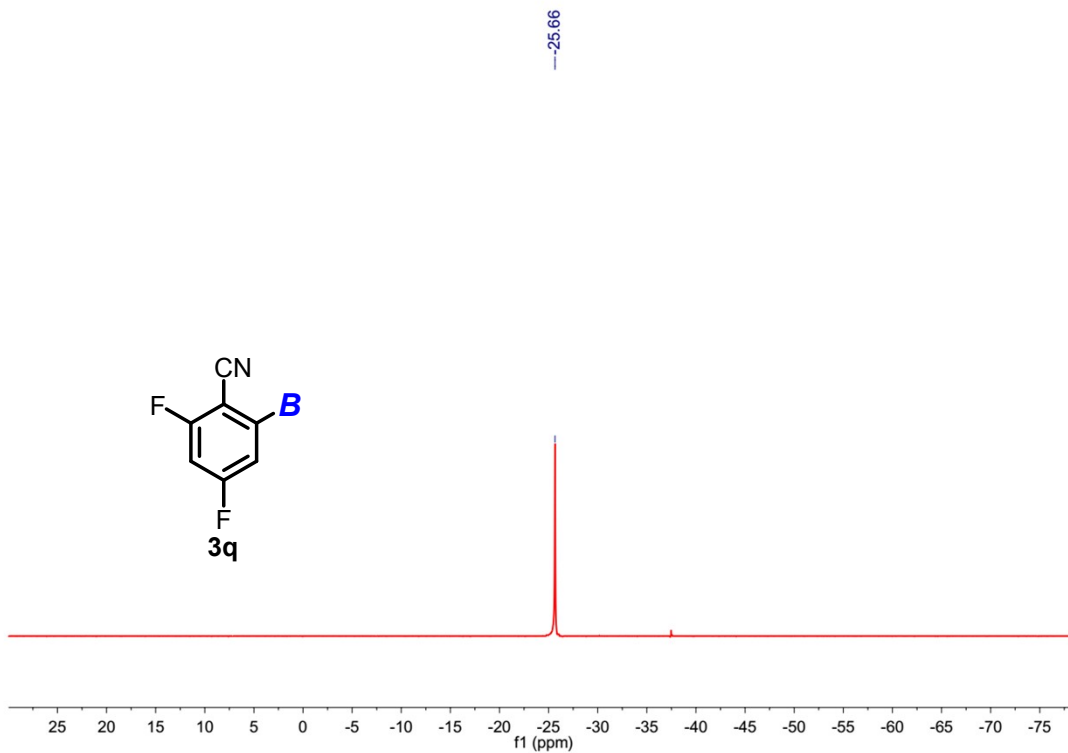

$^{11}\text{B}\{^1\text{H}\}$  NMR (193 MHz,  $\text{CDCl}_3$ )

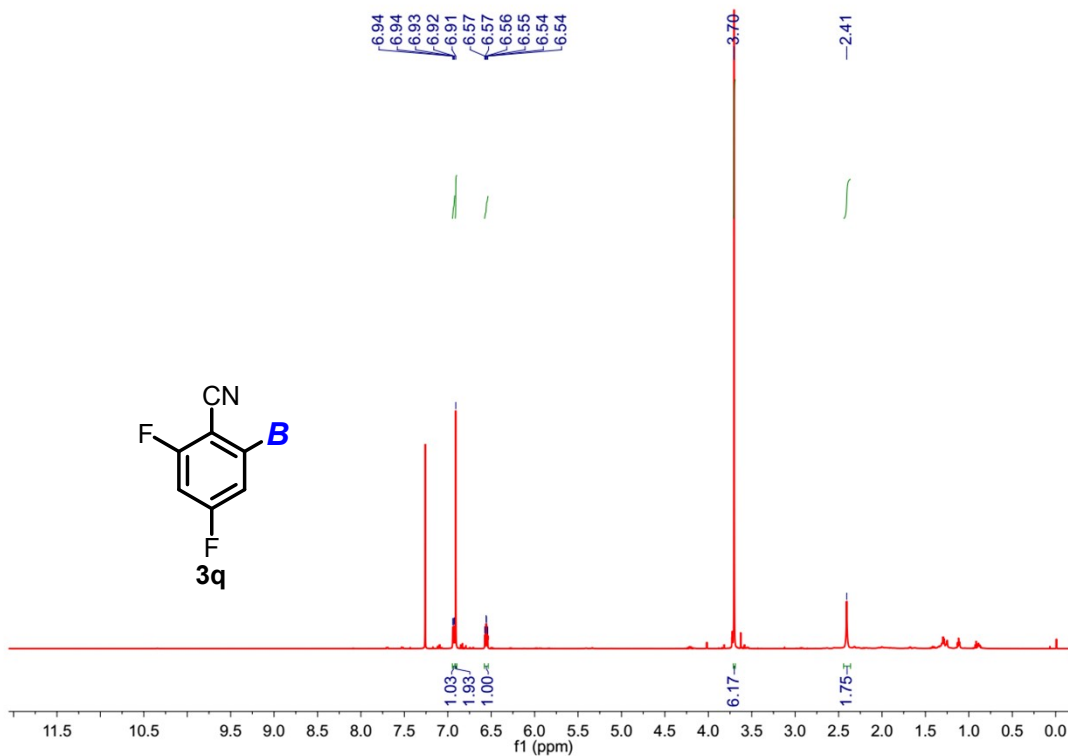

$^1\text{H}\{^{11}\text{B}\}$  NMR (600 MHz,  $\text{CDCl}_3$ )

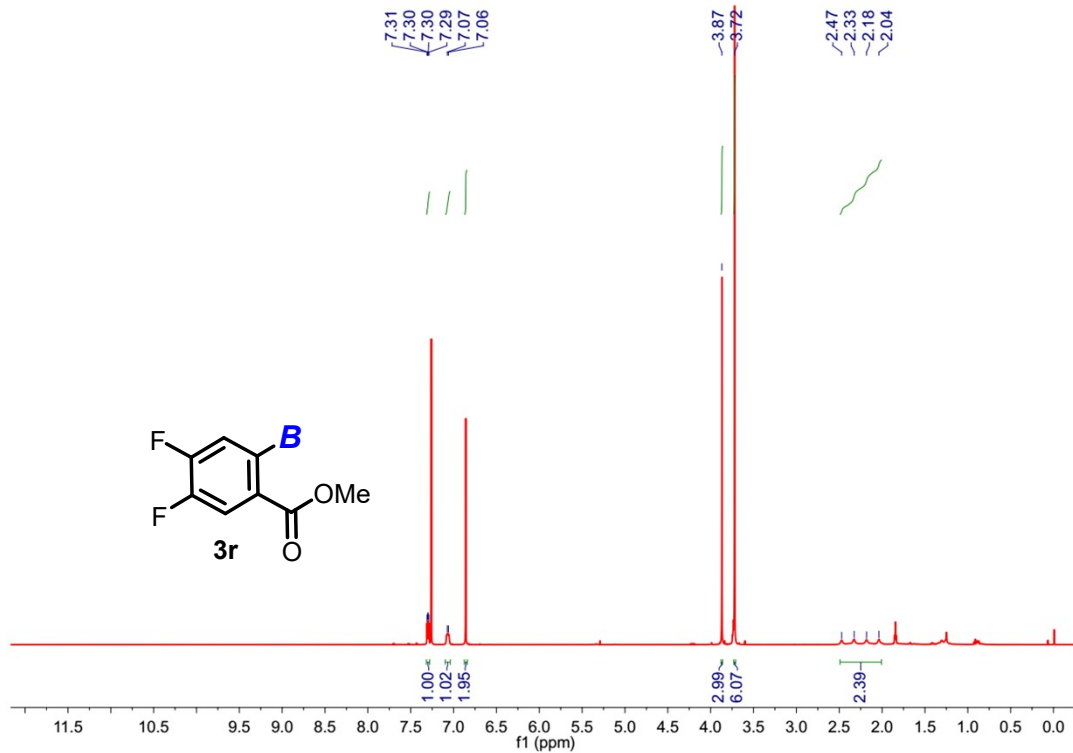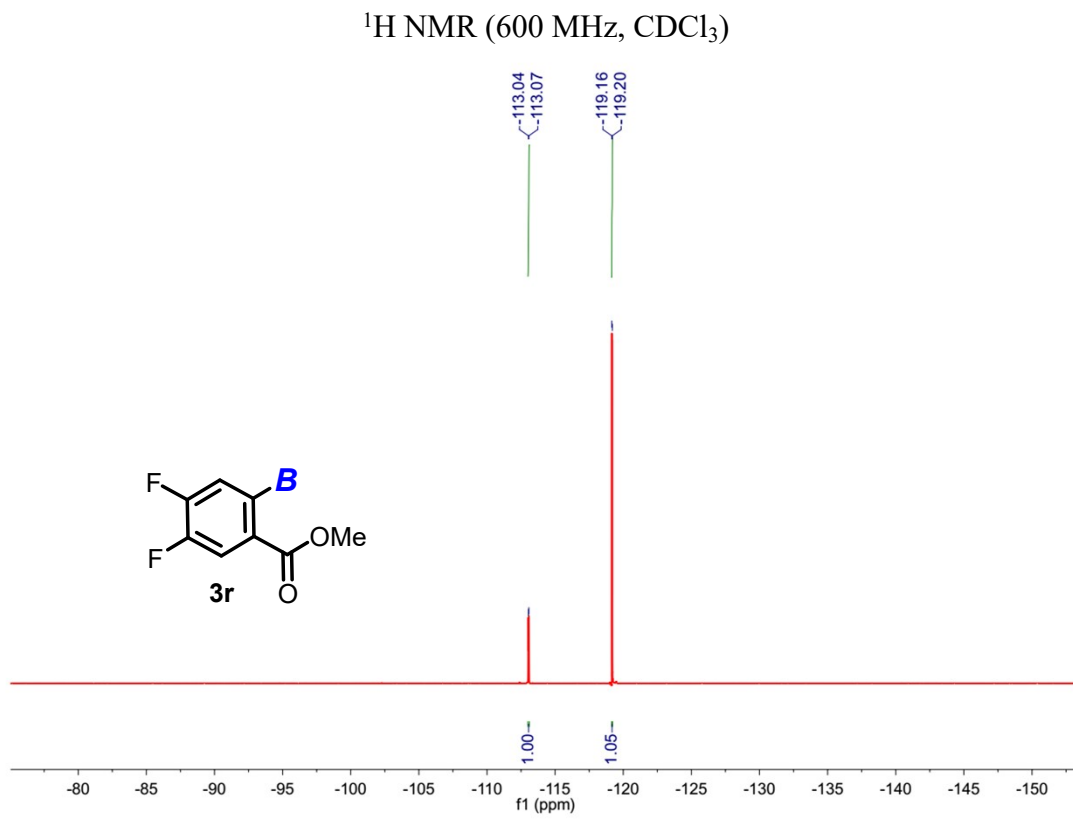



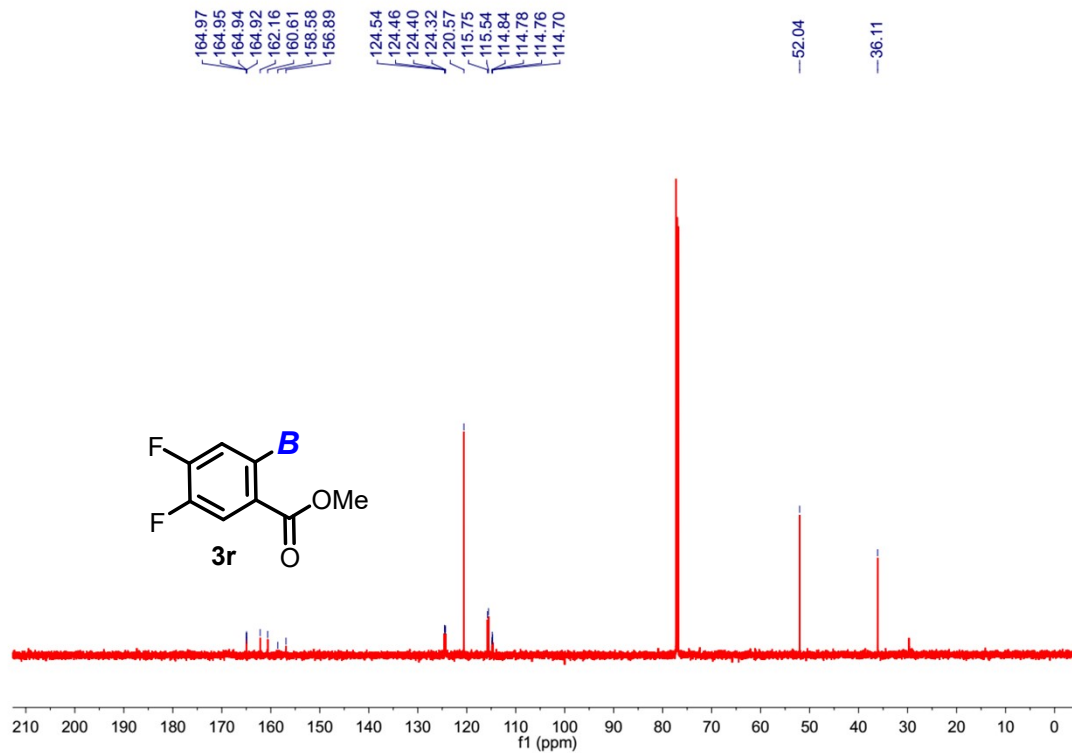

$^{13}\text{C}$  NMR (151 MHz,  $\text{CDCl}_3$ )

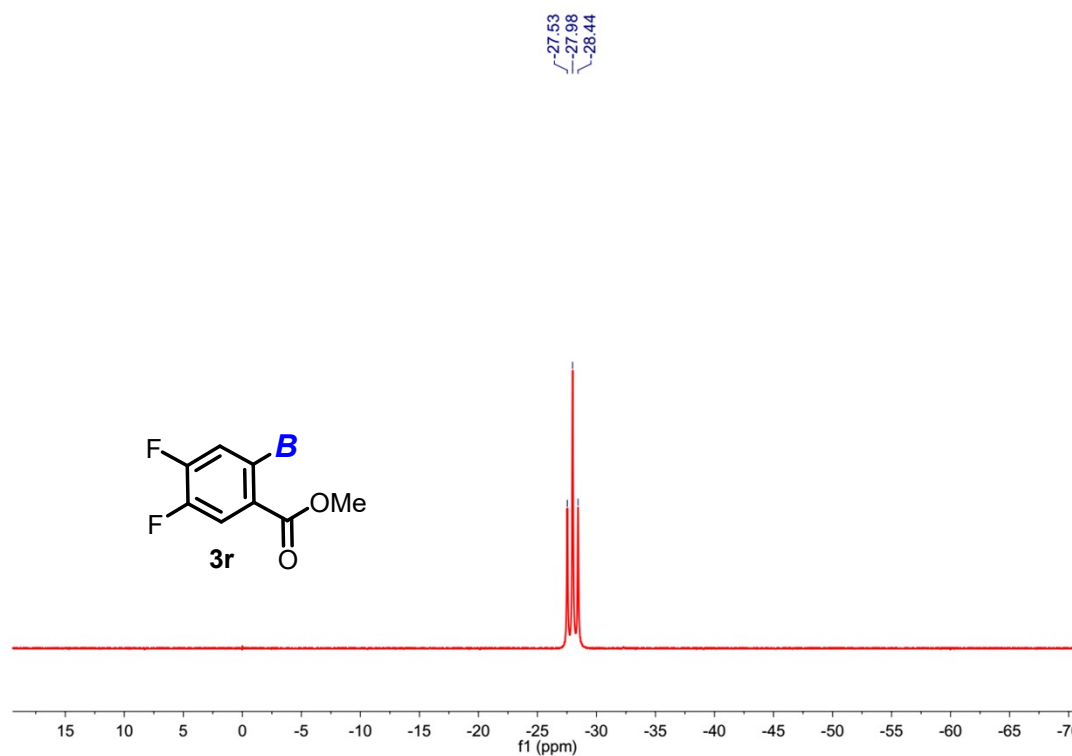

$^{11}\text{B}$  NMR (193 MHz,  $\text{CDCl}_3$ )

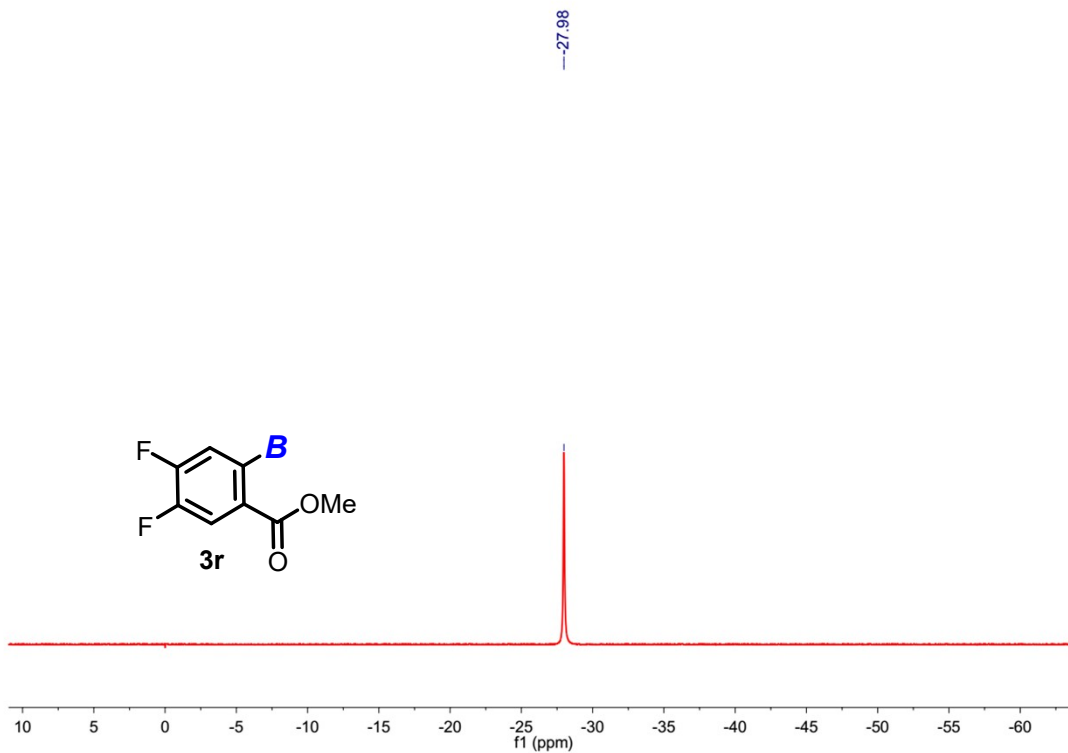

$^{11}\text{B}\{^1\text{H}\}$  NMR (193 MHz,  $\text{CDCl}_3$ )

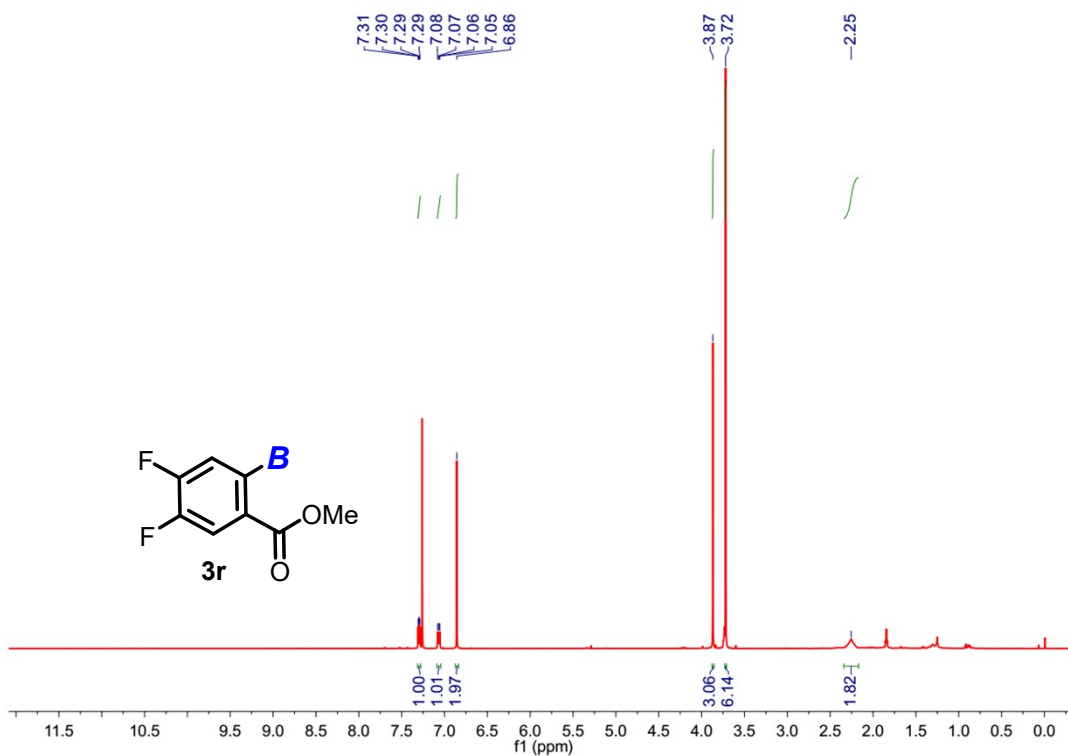

$^1\text{H}\{^{11}\text{B}\}$  NMR (600 MHz,  $\text{CDCl}_3$ )

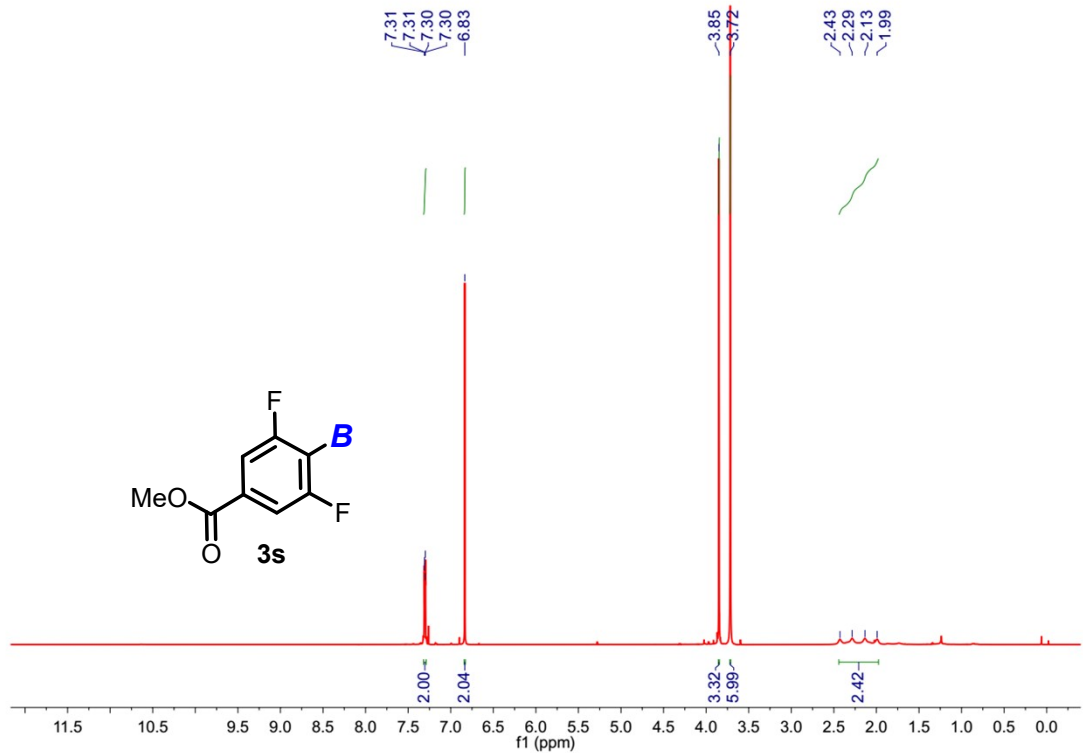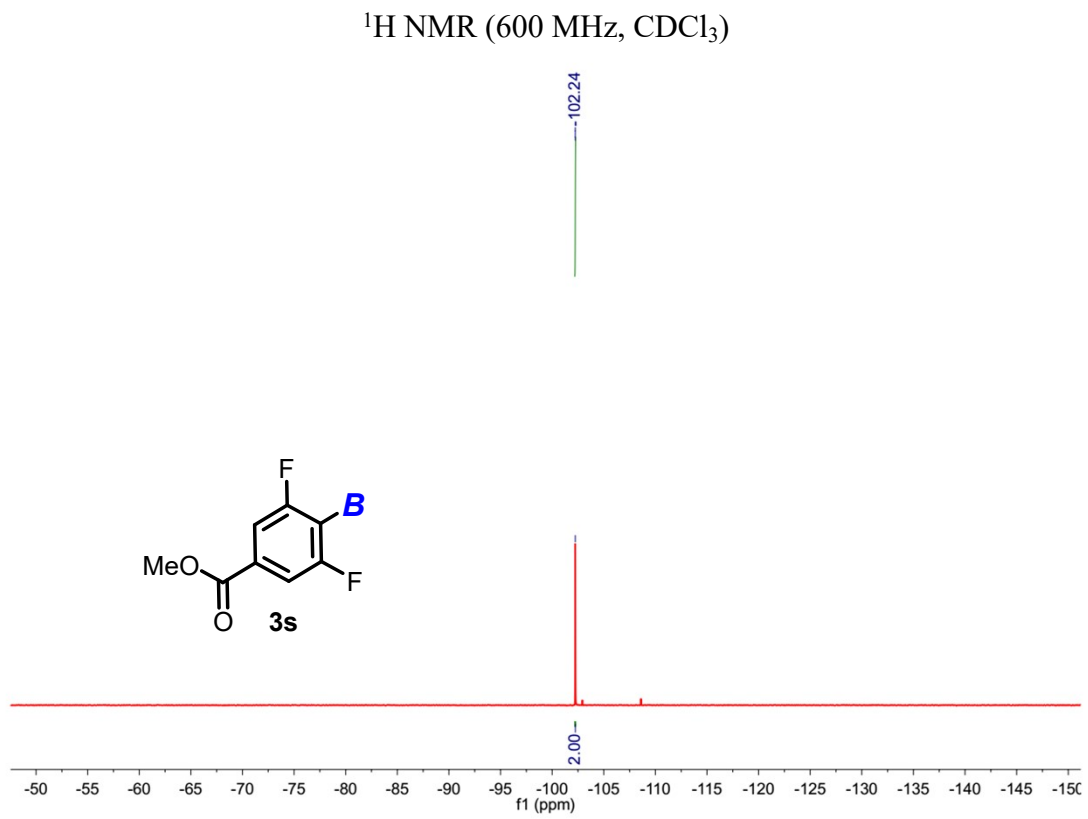

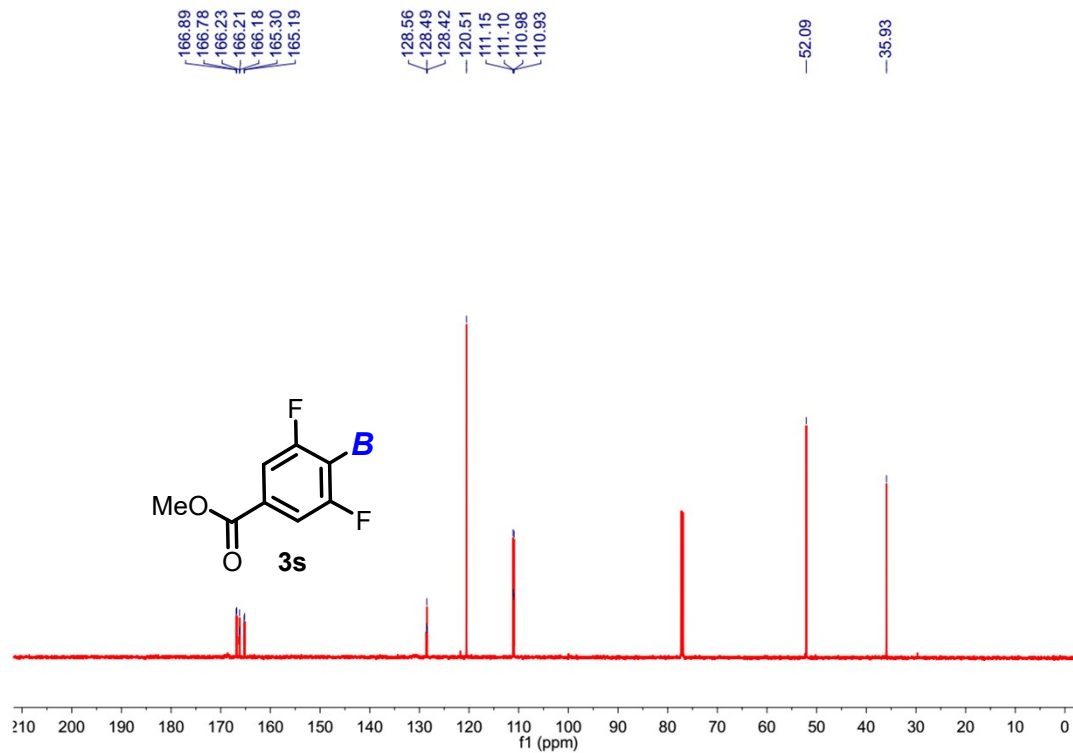

$^{13}\text{C}$  NMR (151 MHz,  $\text{CDCl}_3$ )

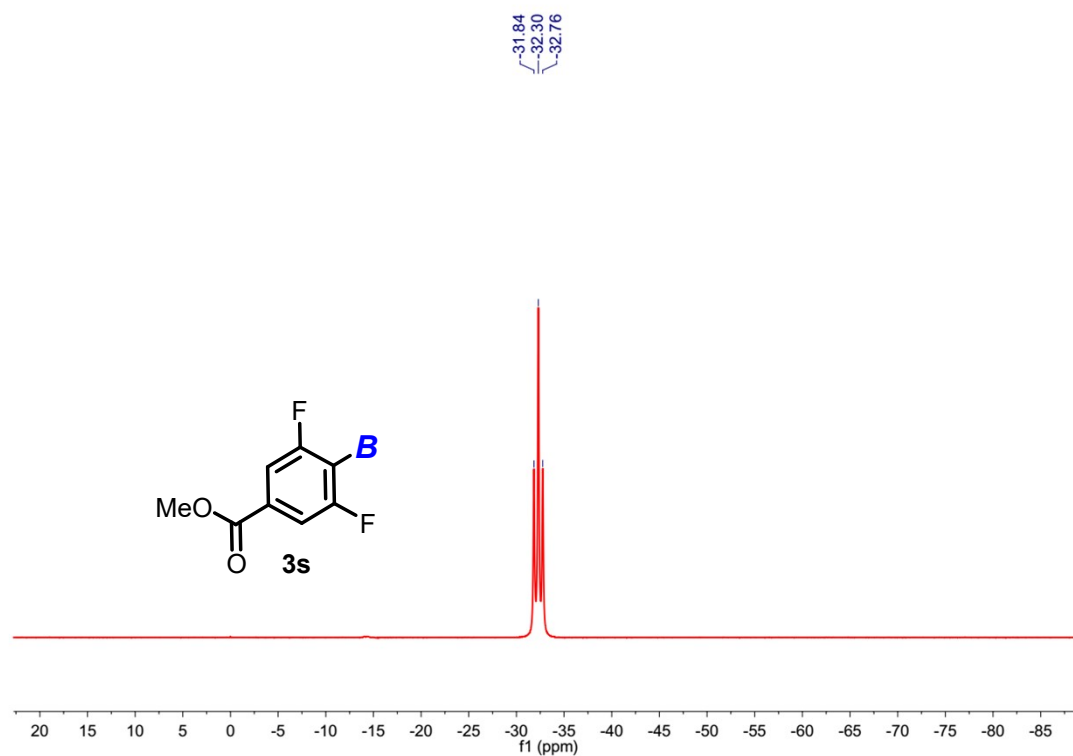

$^{11}\text{B}$  NMR (193 MHz,  $\text{CDCl}_3$ )

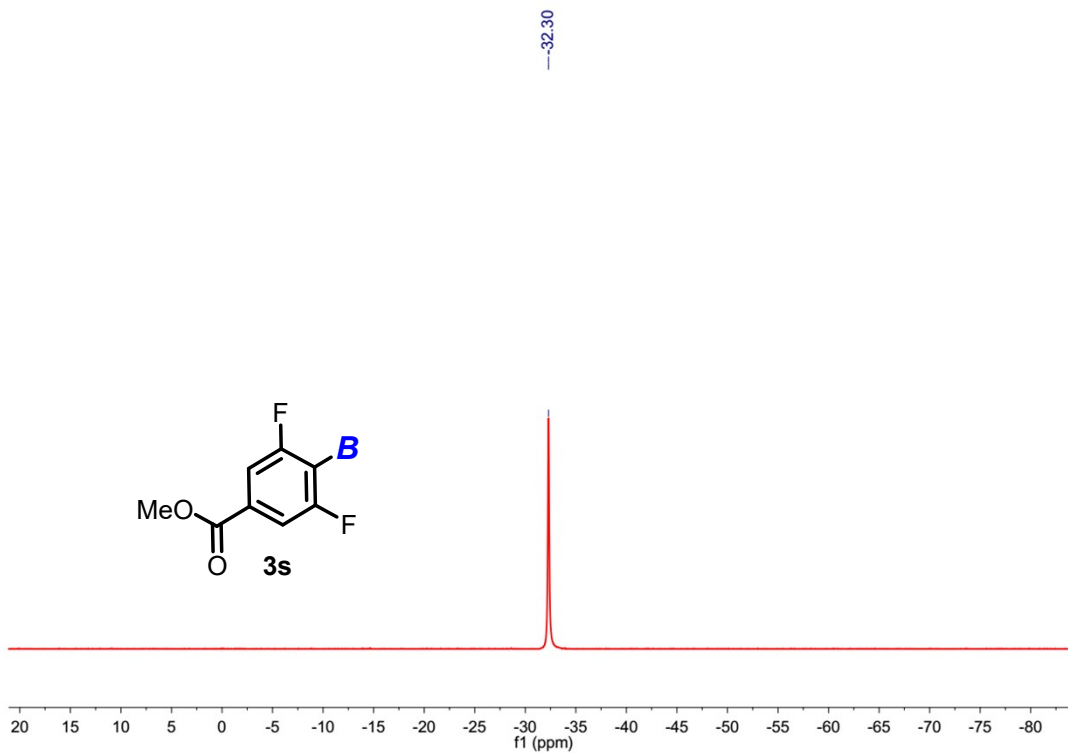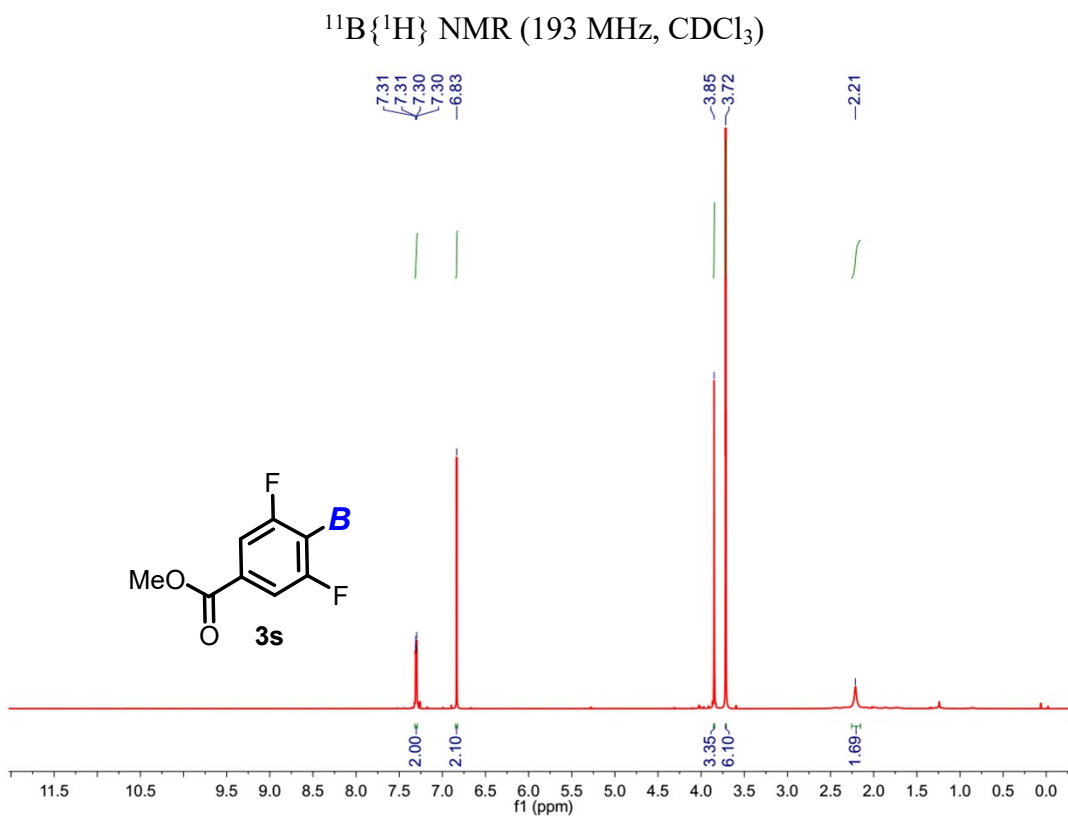

$^1\text{H}\{^{11}\text{B}\}$  NMR (600 MHz,  $\text{CDCl}_3$ )

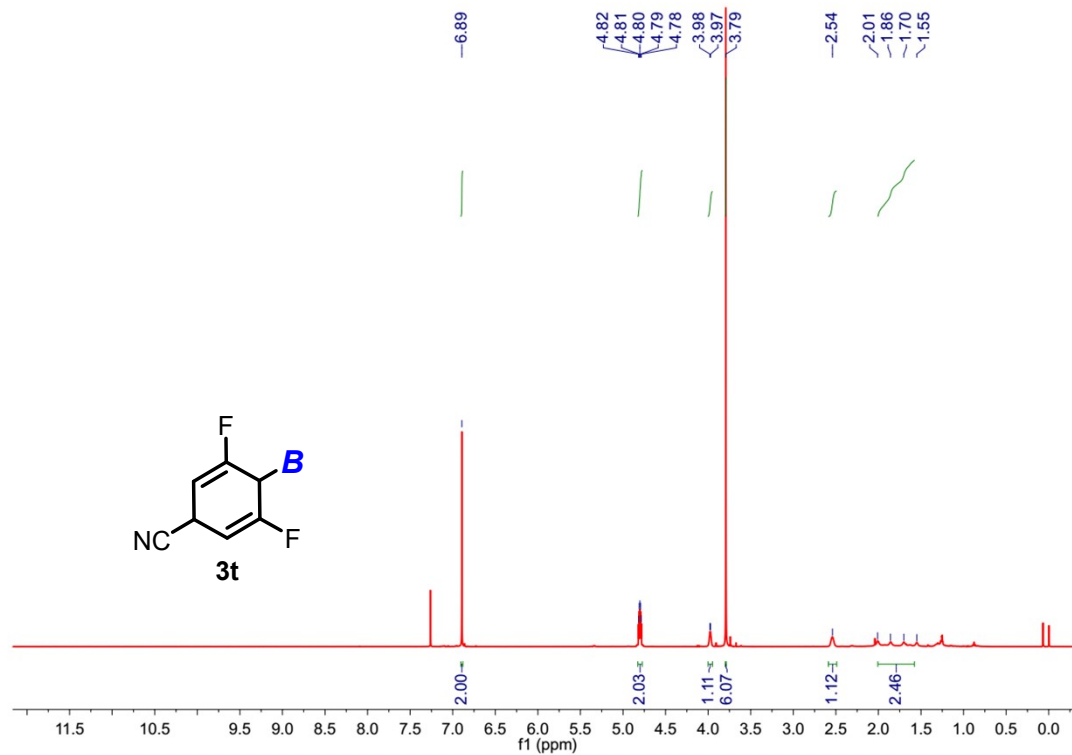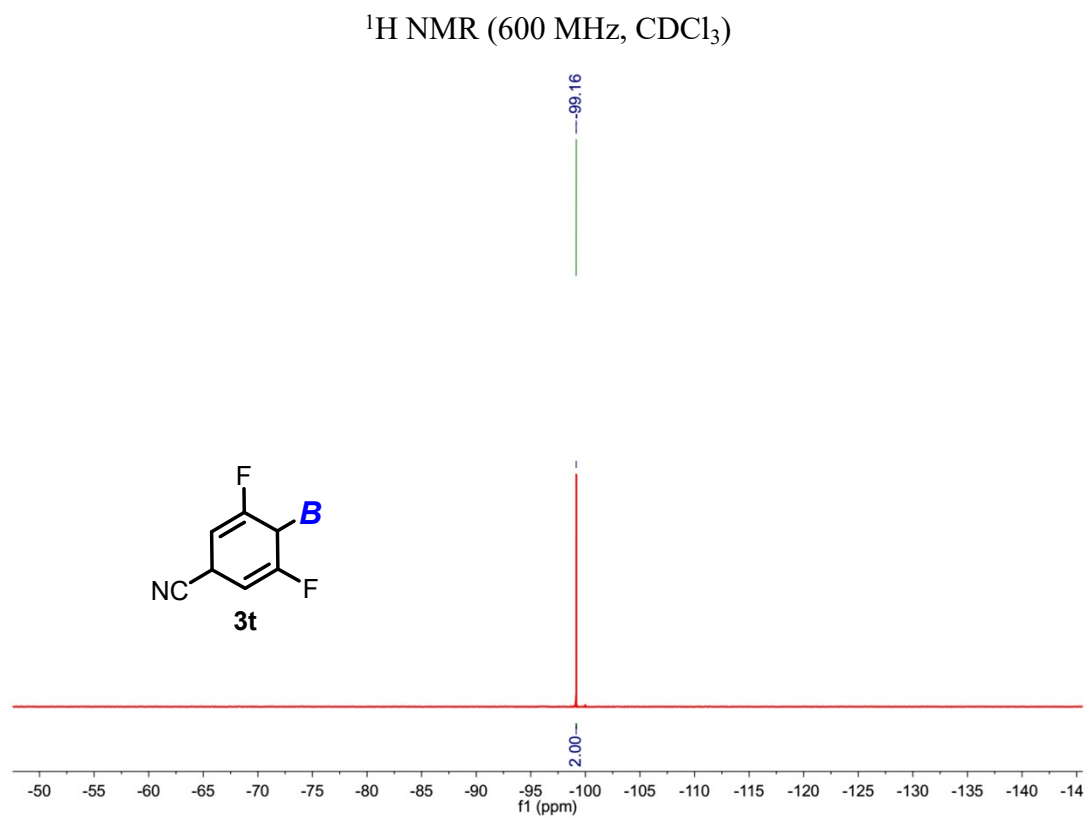

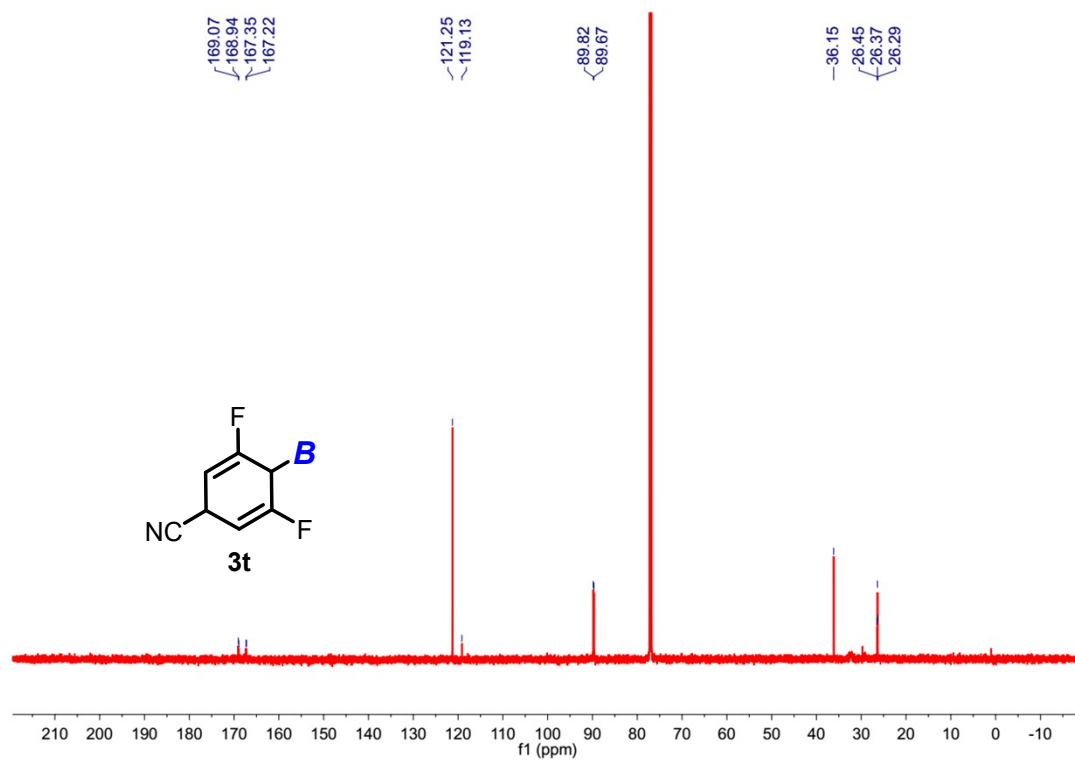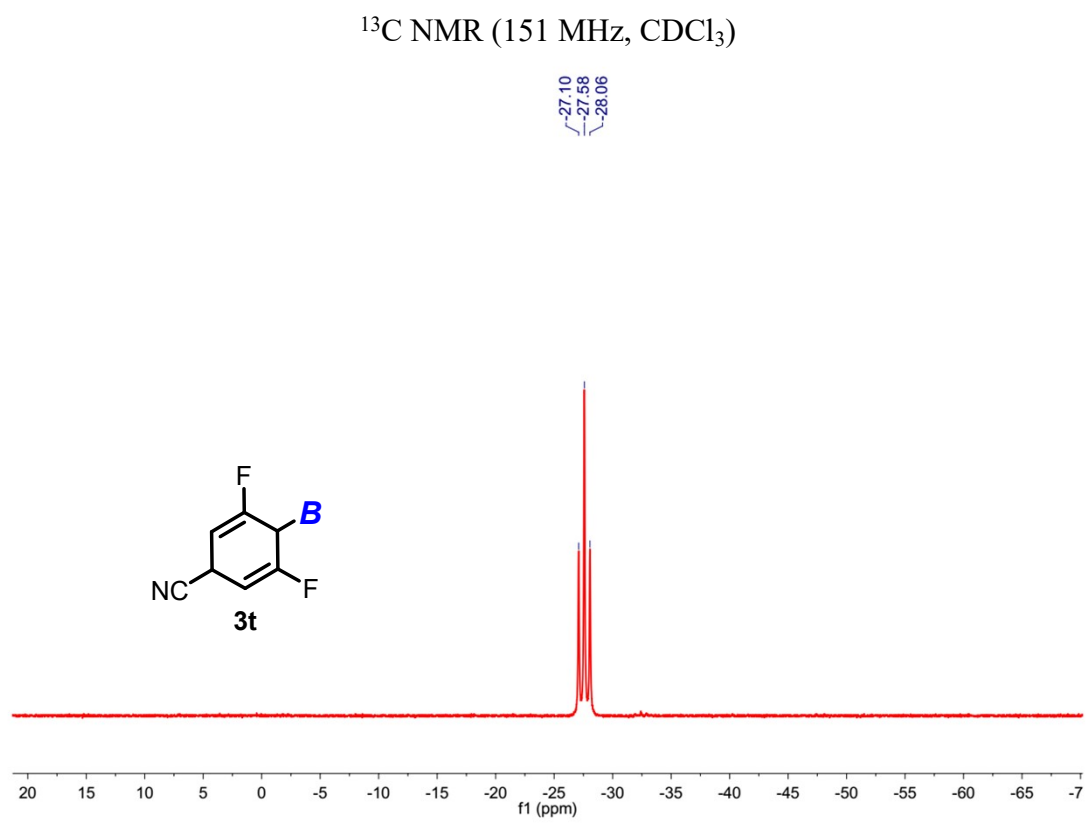

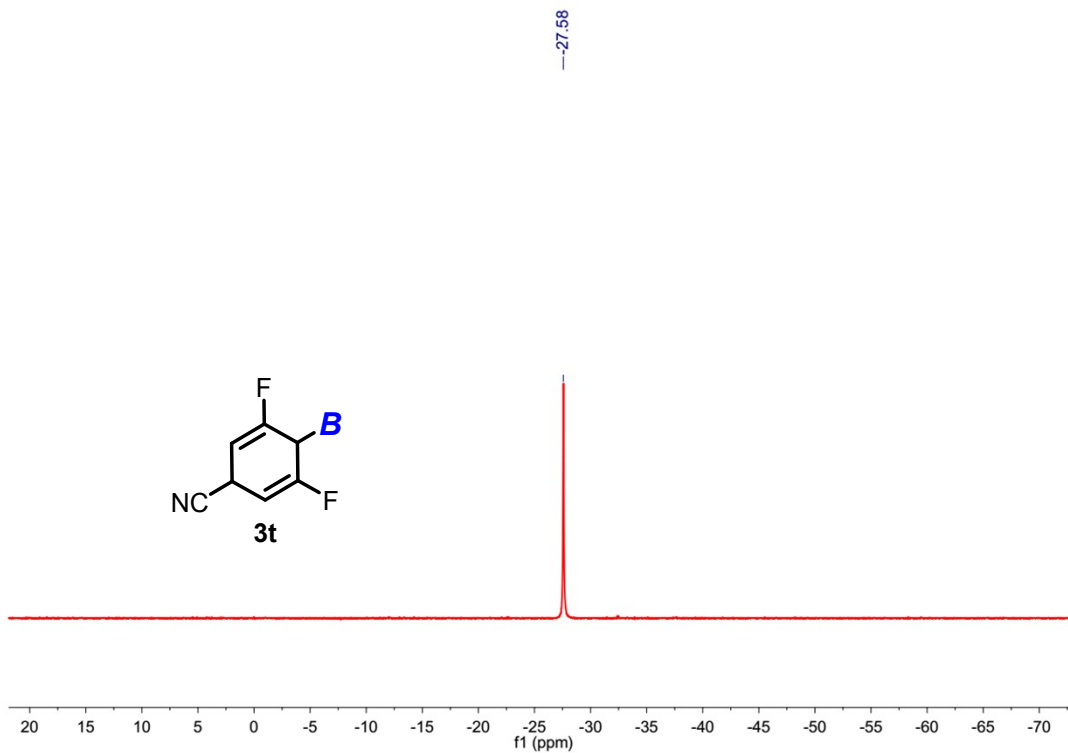

$^{11}\text{B}\{^1\text{H}\}$  NMR (193 MHz,  $\text{CDCl}_3$ )

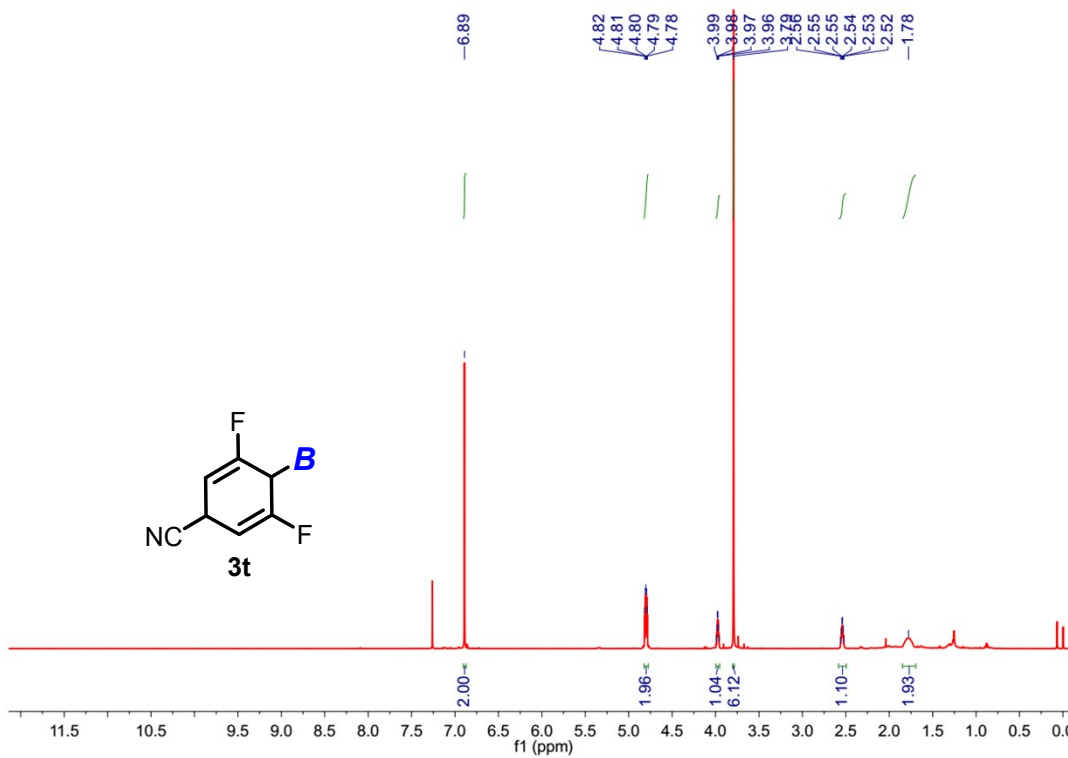

$^1\text{H}\{^{11}\text{B}\}$  NMR (600 MHz,  $\text{CDCl}_3$ )



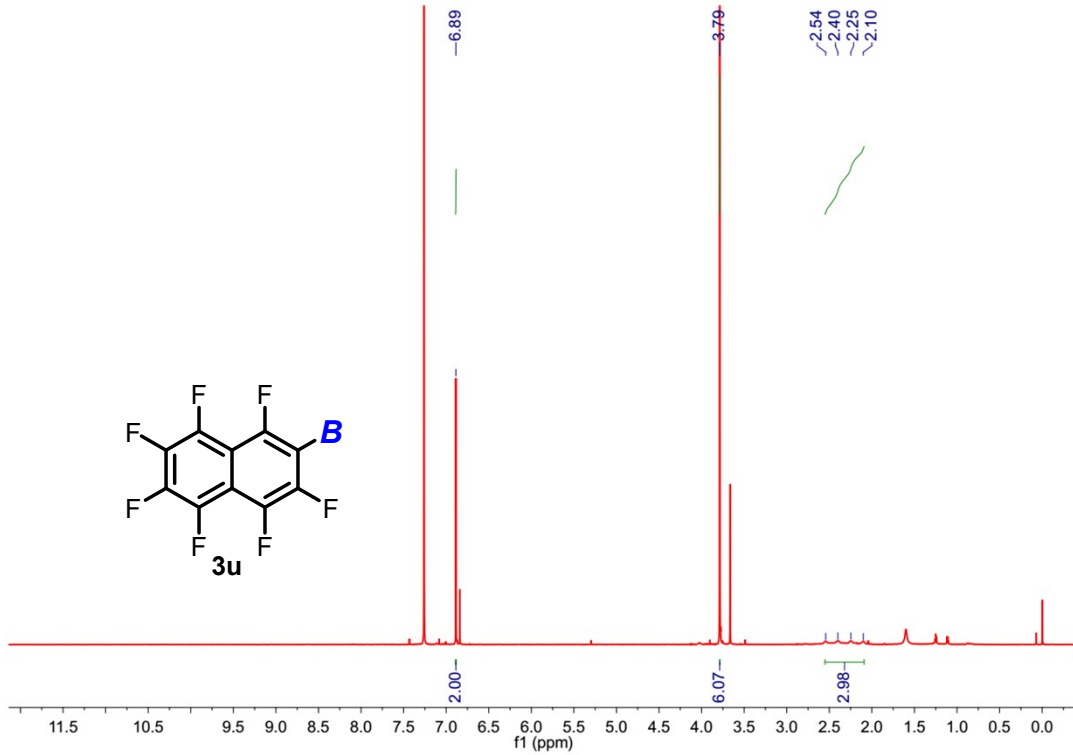

<sup>1</sup>H NMR (600 MHz, CDCl<sub>3</sub>)

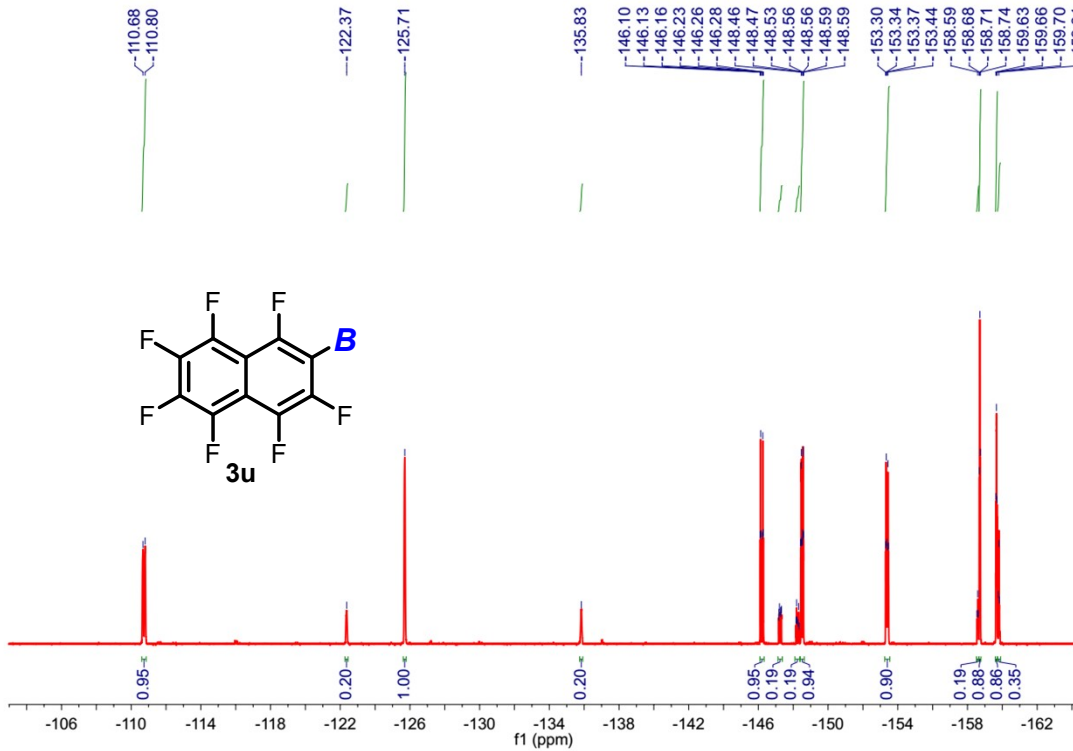

<sup>19</sup>F NMR (565 MHz, CDCl<sub>3</sub>)

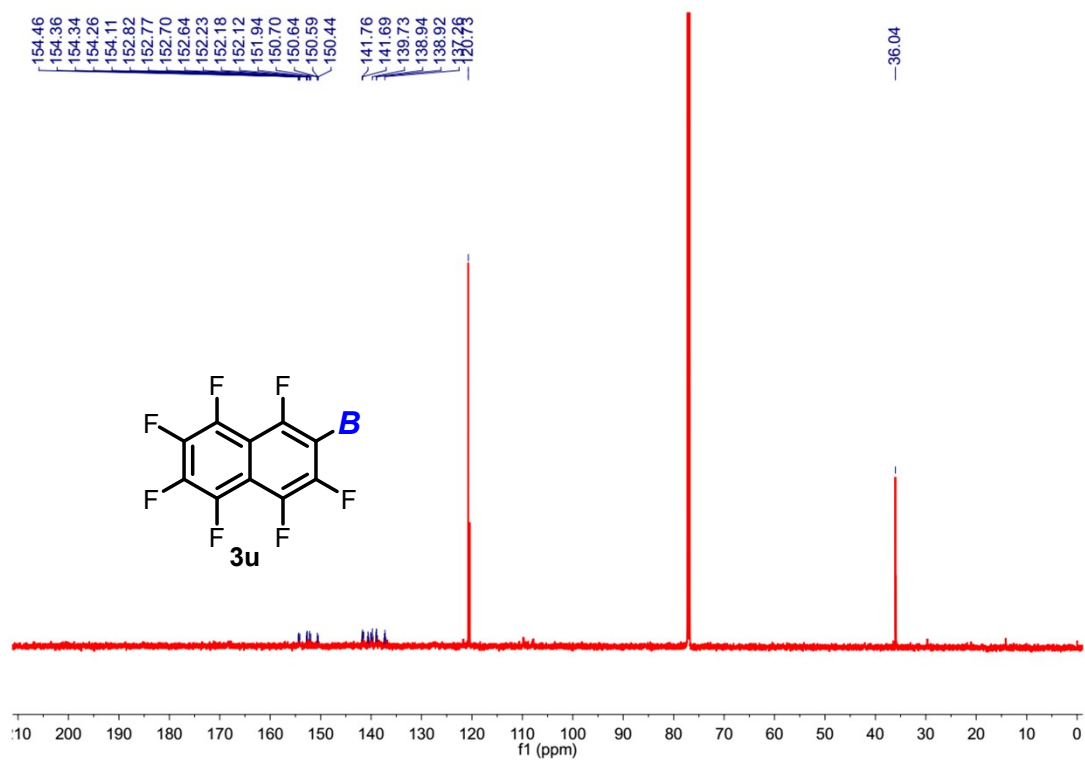

$^{13}\text{C}$  NMR (151 MHz,  $\text{CDCl}_3$ )

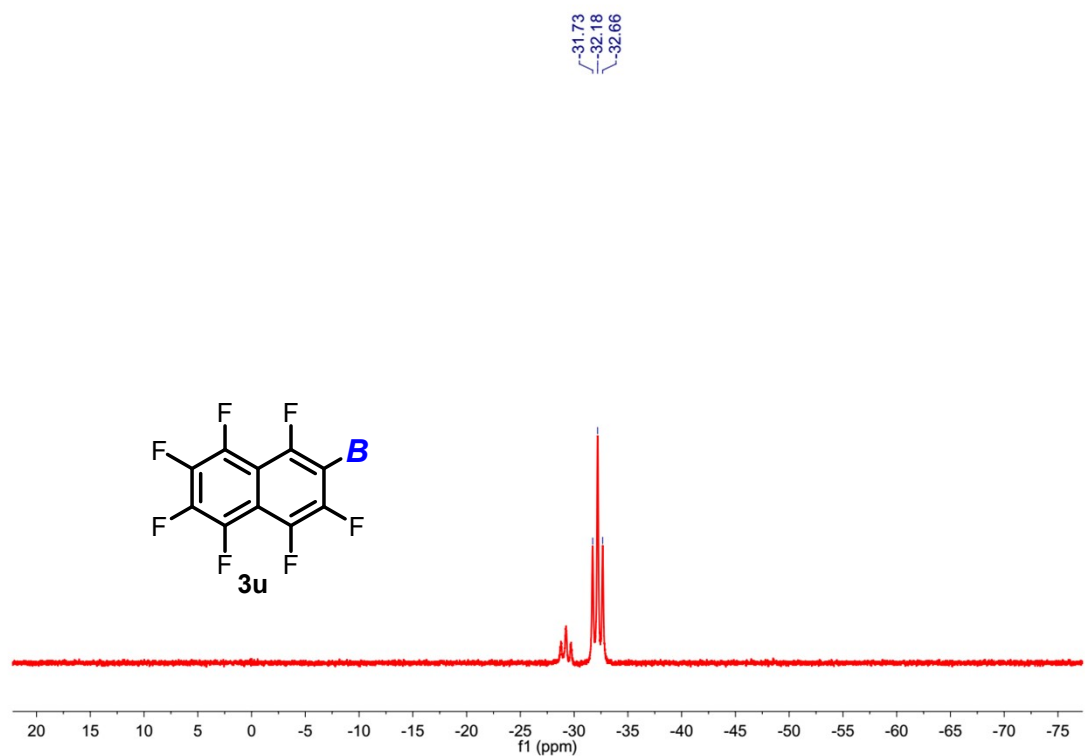

$^{11}\text{B}$  NMR (193 MHz,  $\text{CDCl}_3$ )

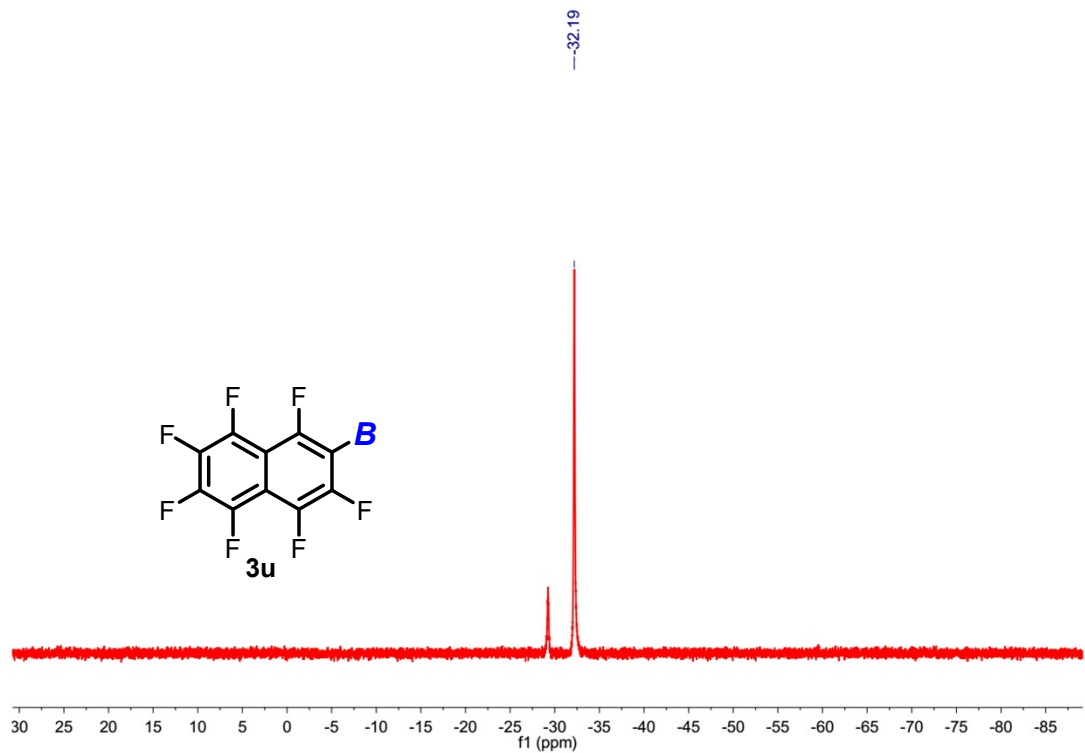

$^{11}\text{B}\{^1\text{H}\}$  NMR (193 MHz,  $\text{CDCl}_3$ )

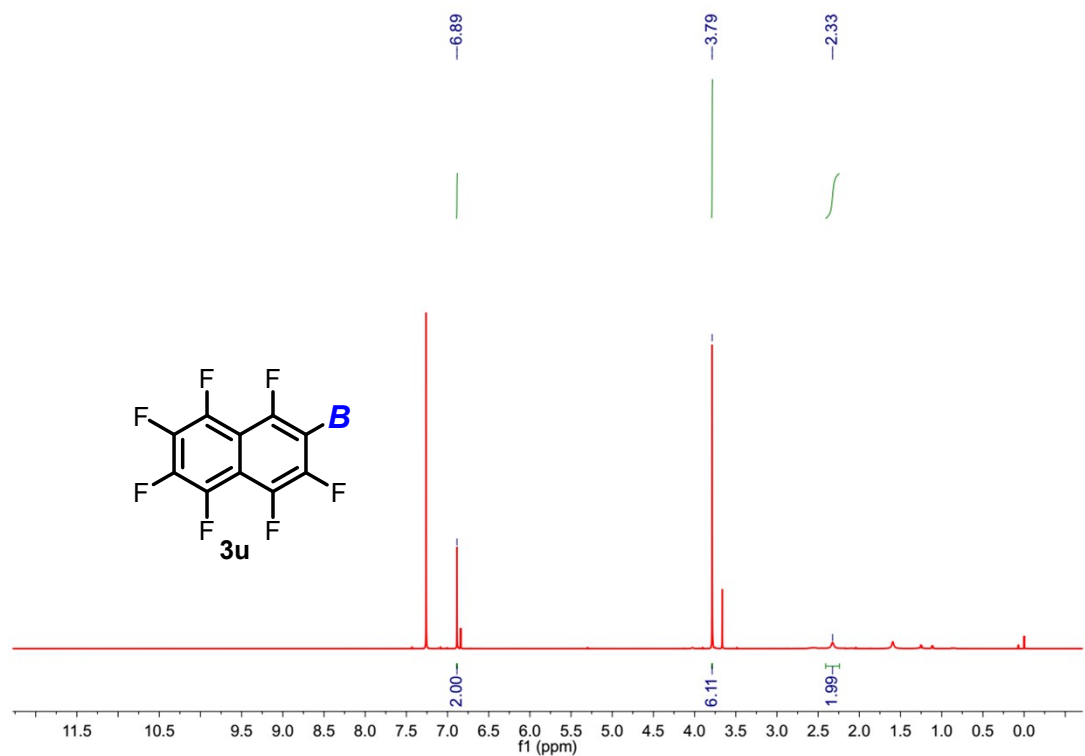

$^1\text{H}\{^{11}\text{B}\}$  NMR (600 MHz,  $\text{CDCl}_3$ )

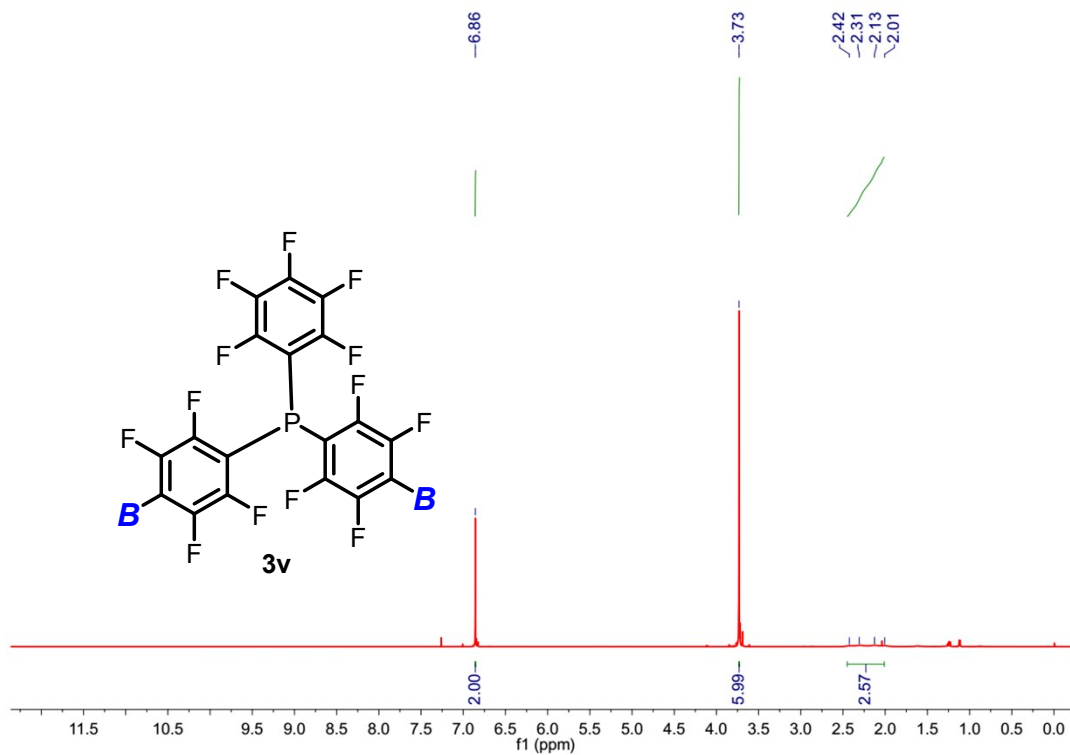

$^1\text{H NMR}$  (600 MHz,  $\text{CDCl}_3$ )

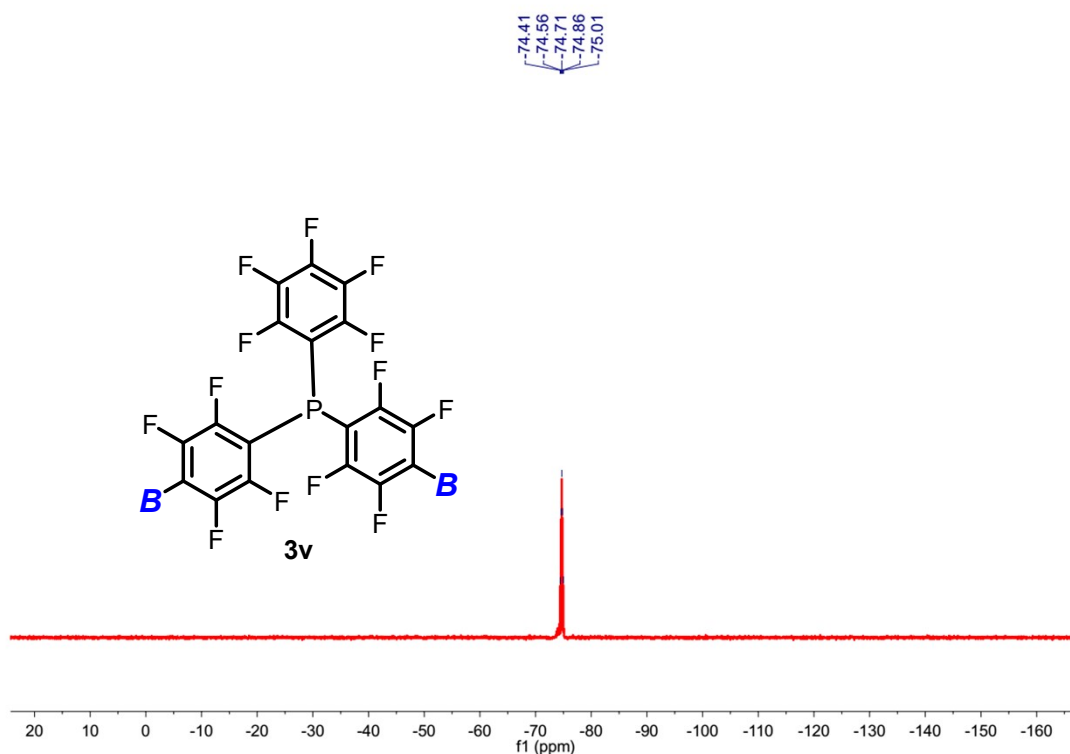

$^{31}\text{P NMR}$  (243 MHz,  $\text{CDCl}_3$ )

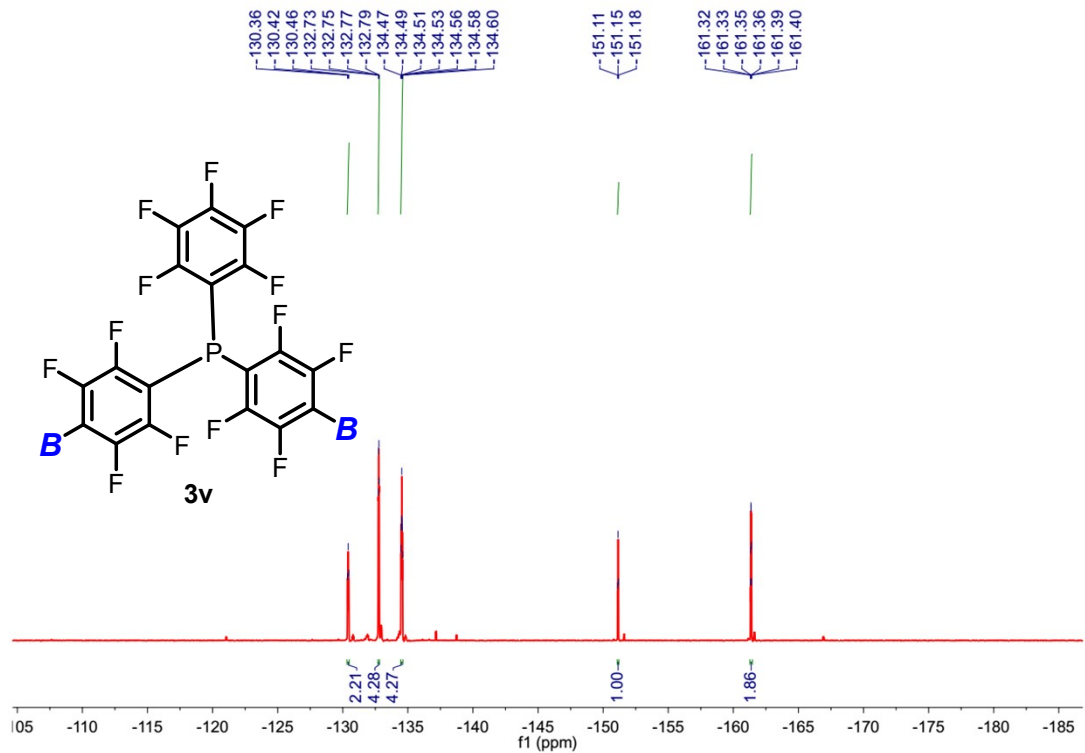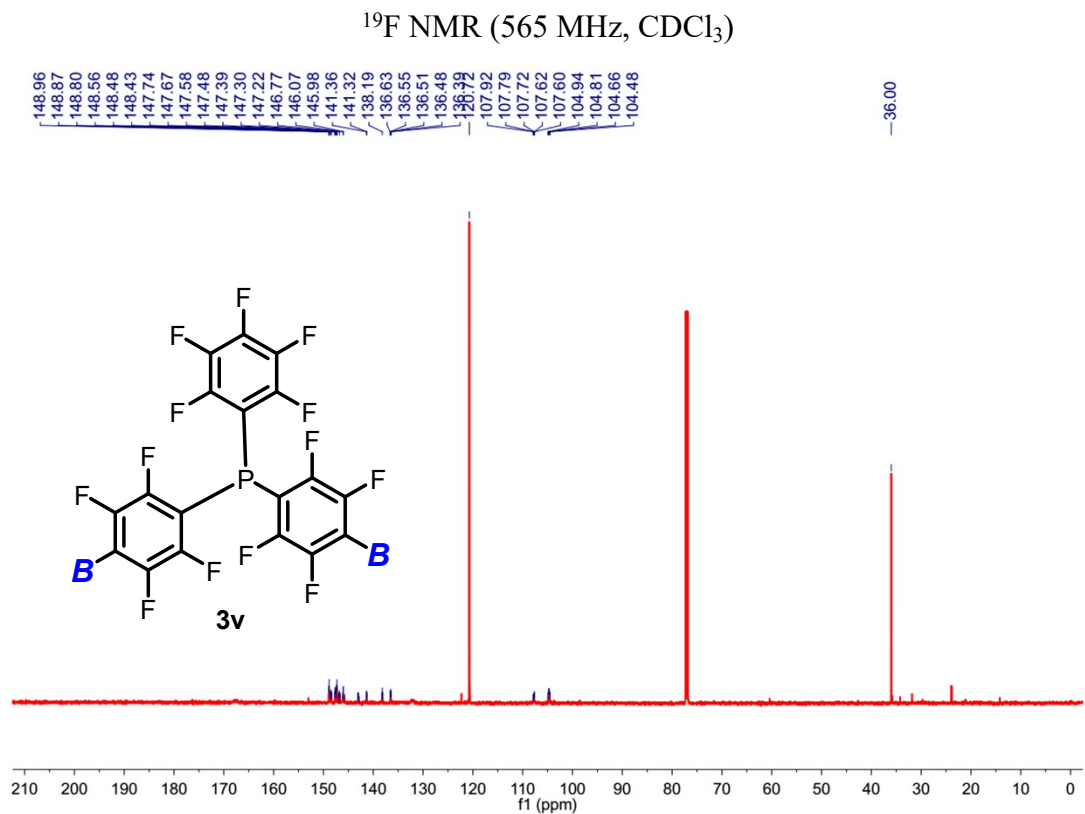

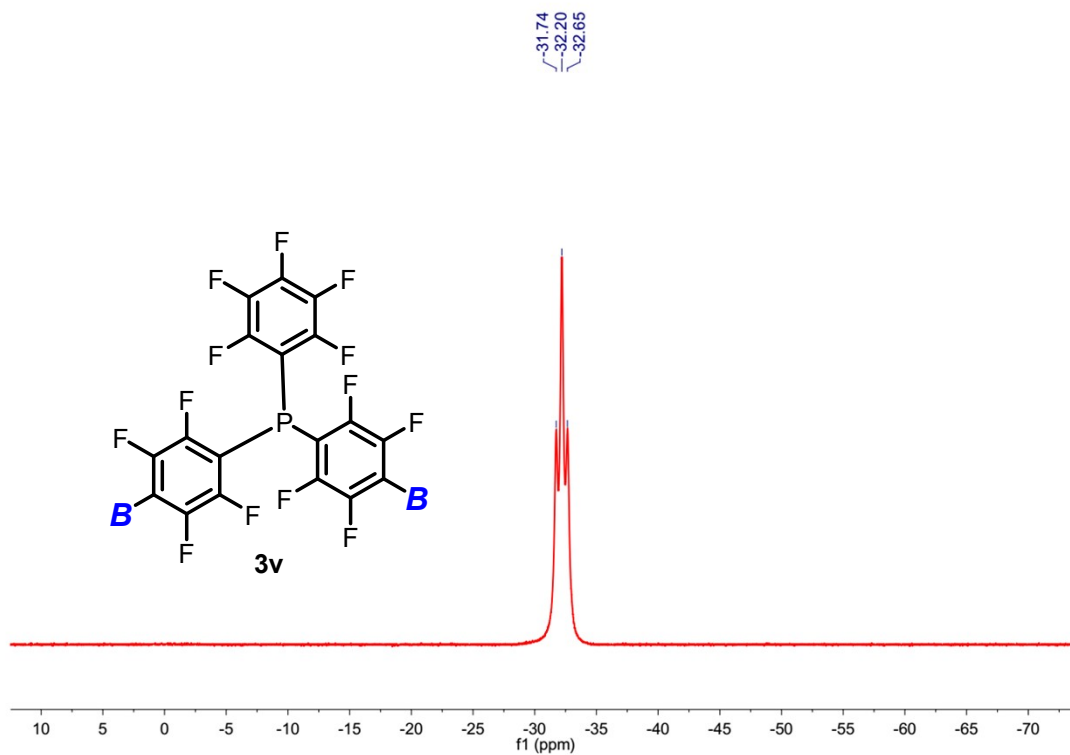

$^{11}\text{B}$  NMR (193 MHz,  $\text{CDCl}_3$ )

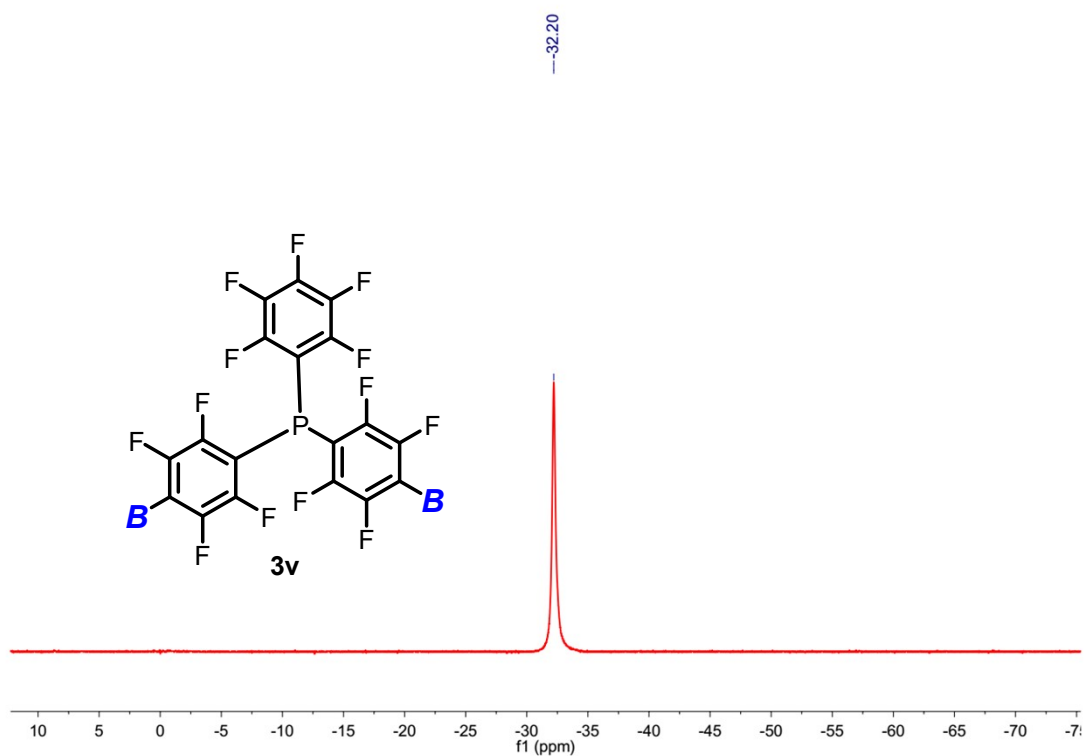

$^{11}\text{B}\{^1\text{H}\}$  NMR (193 MHz,  $\text{CDCl}_3$ )

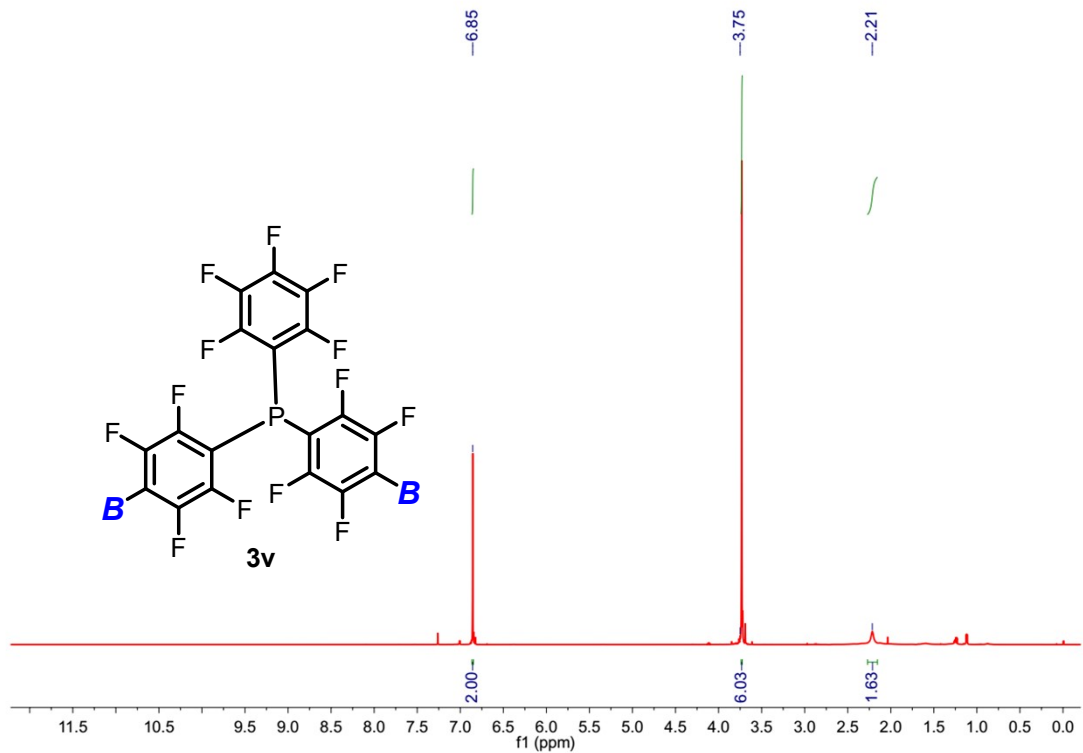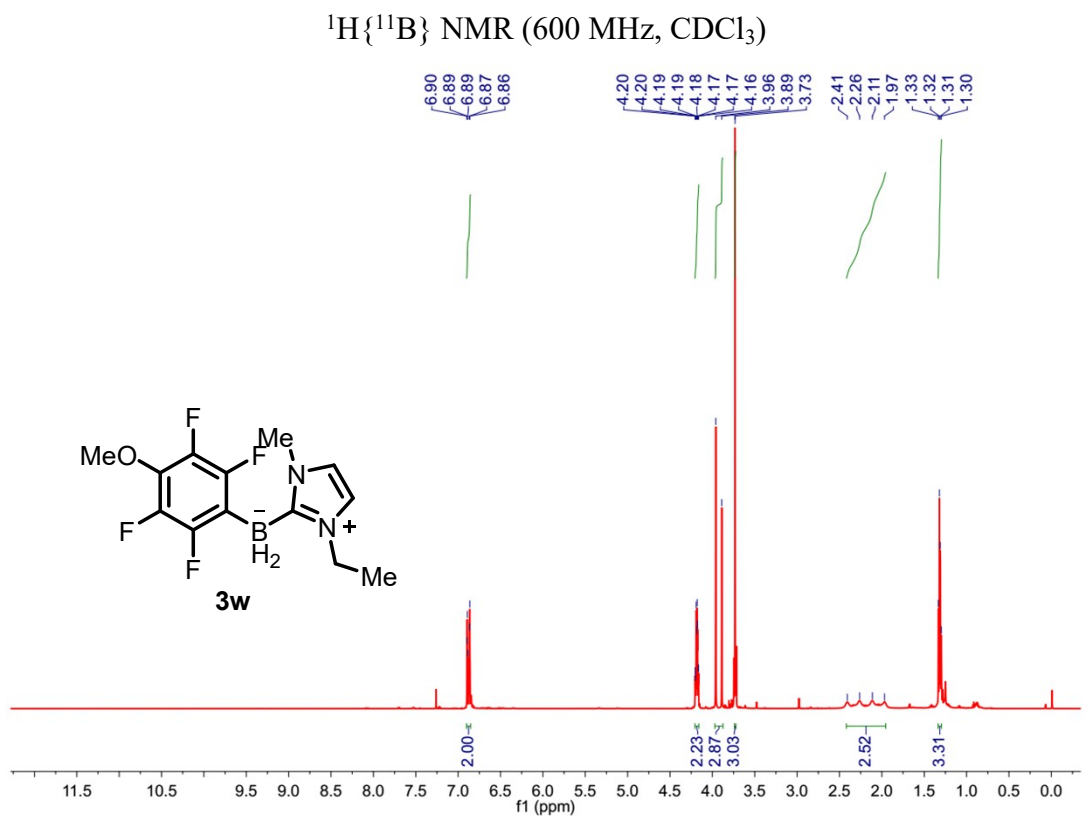

$^1\text{H}$  NMR (600 MHz,  $\text{CDCl}_3$ )

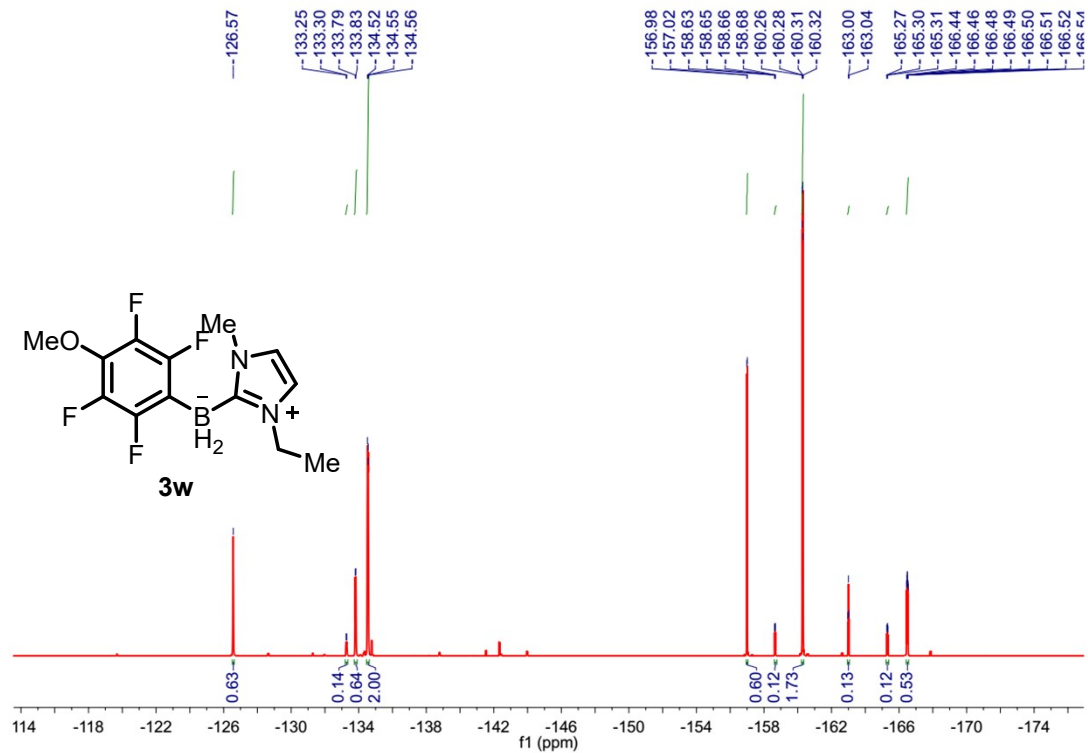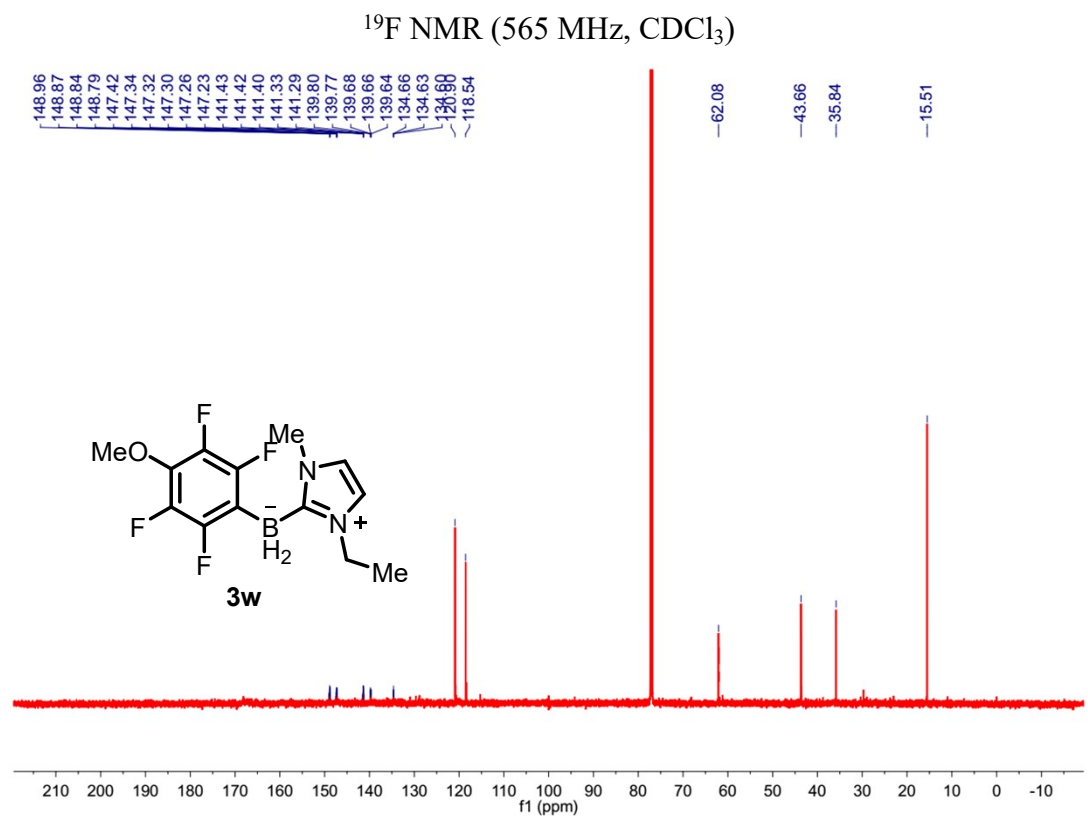



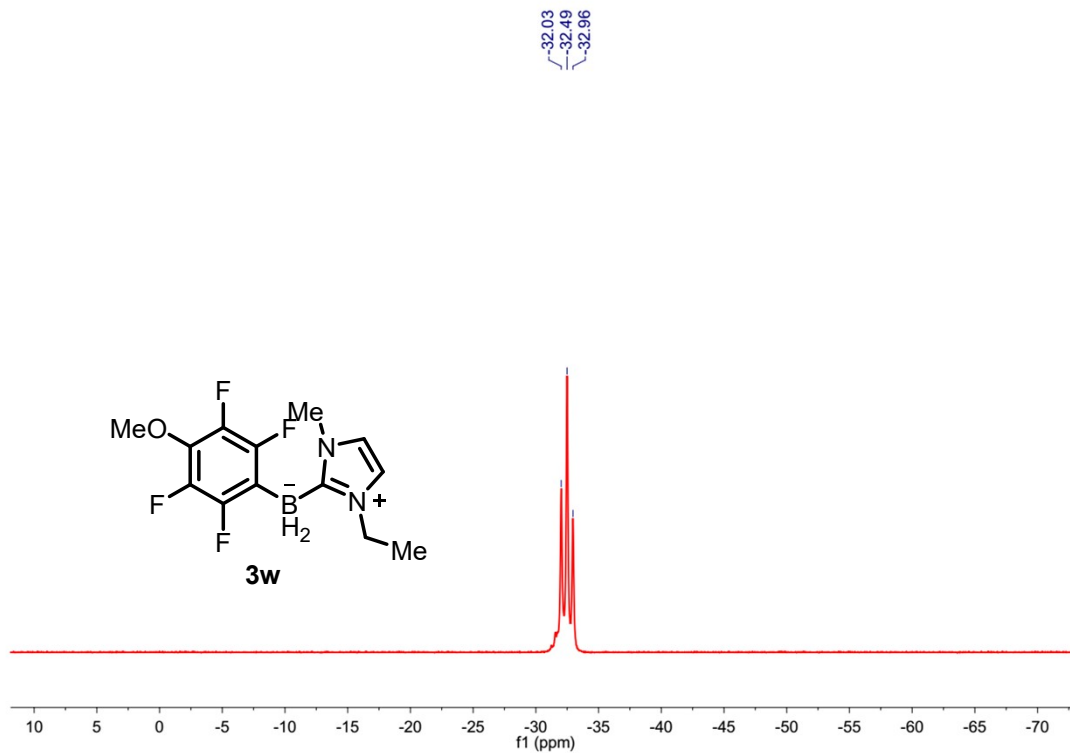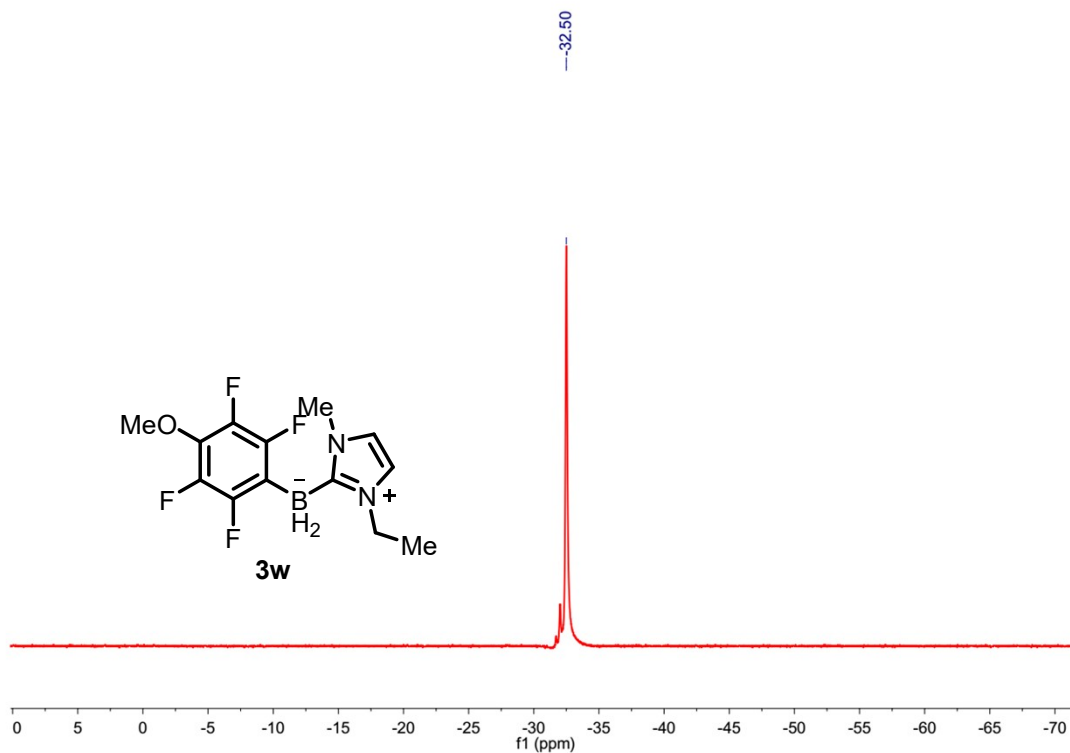

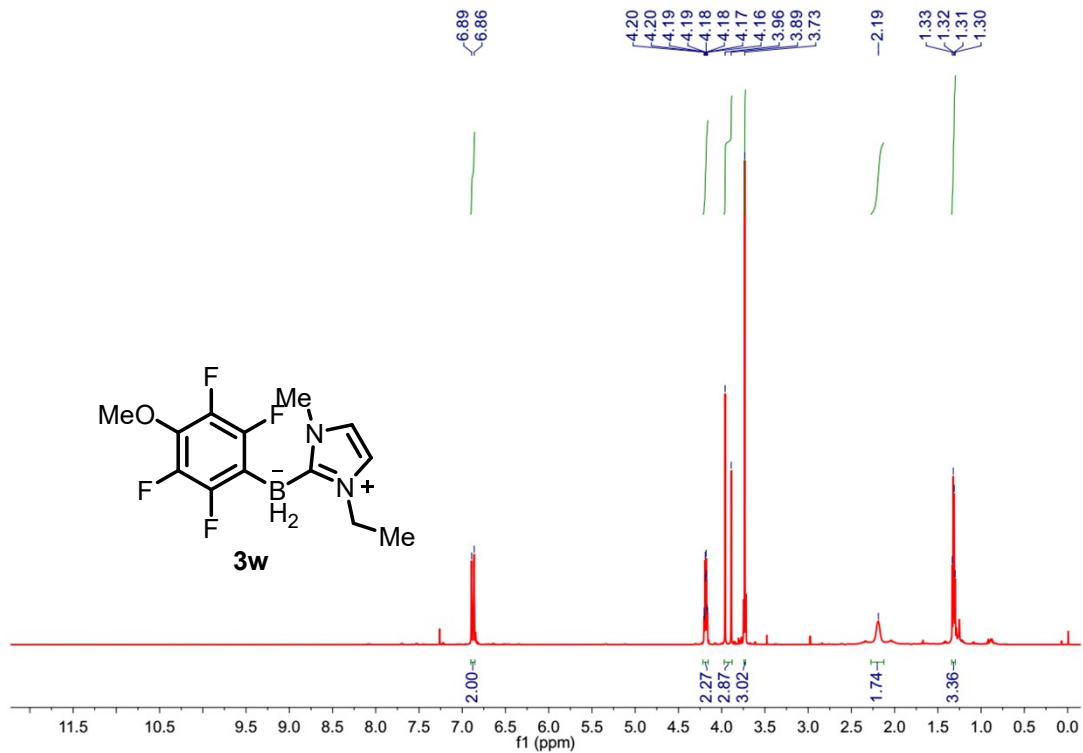

$^1\text{H}\{^{11}\text{B}\}$  NMR (600 MHz,  $\text{CDCl}_3$ )

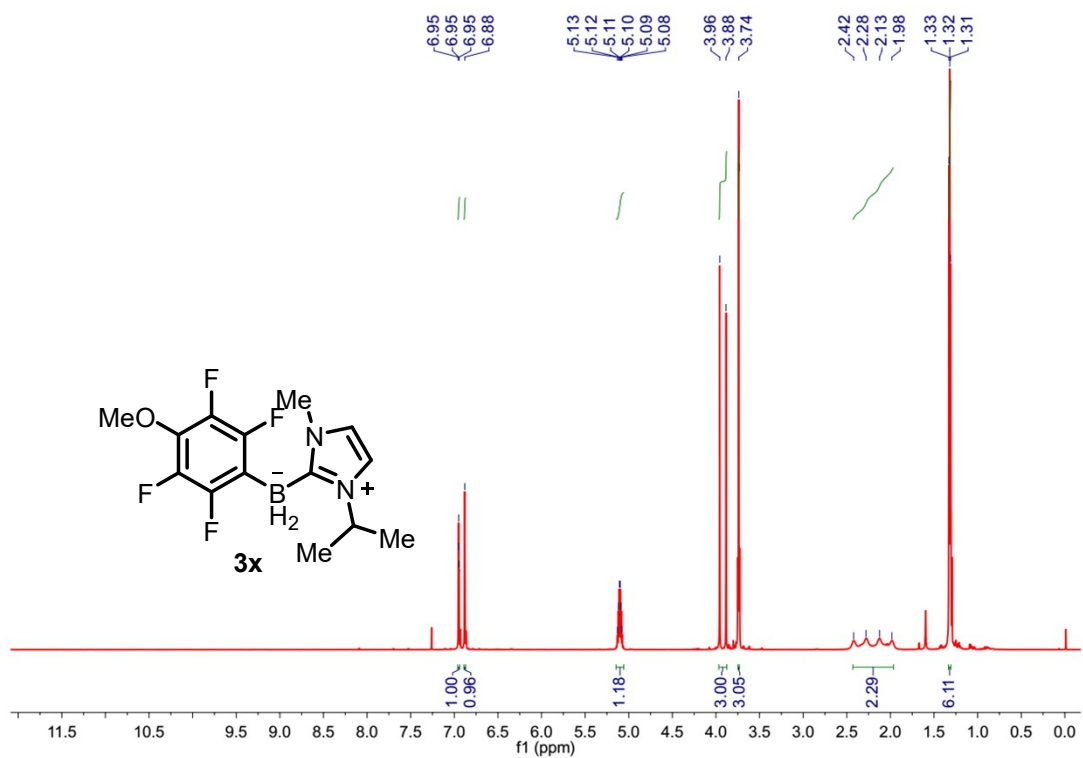

$^1\text{H}$  NMR (600 MHz,  $\text{CDCl}_3$ )

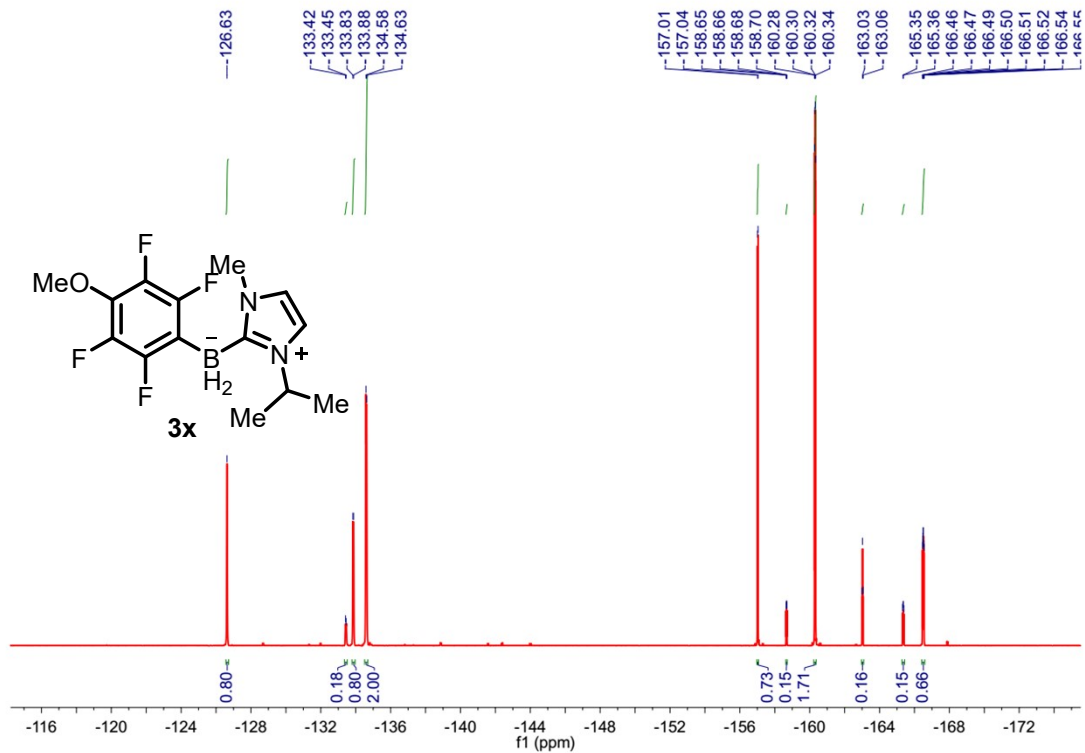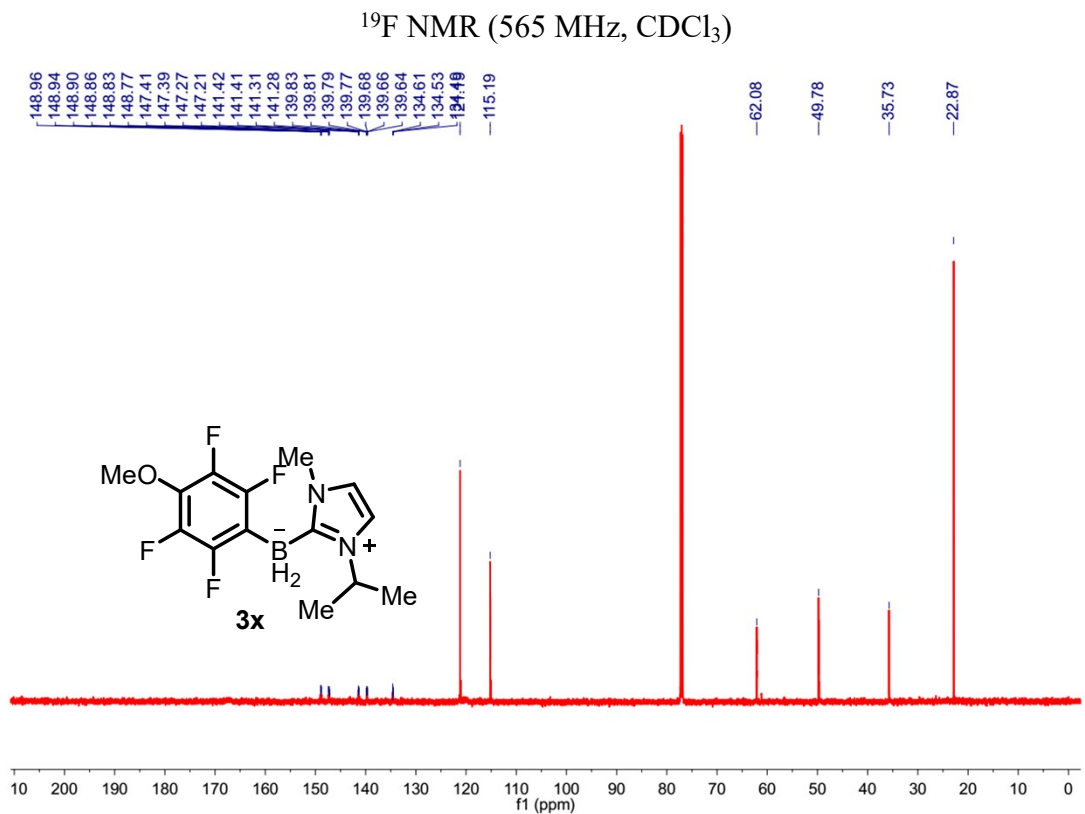

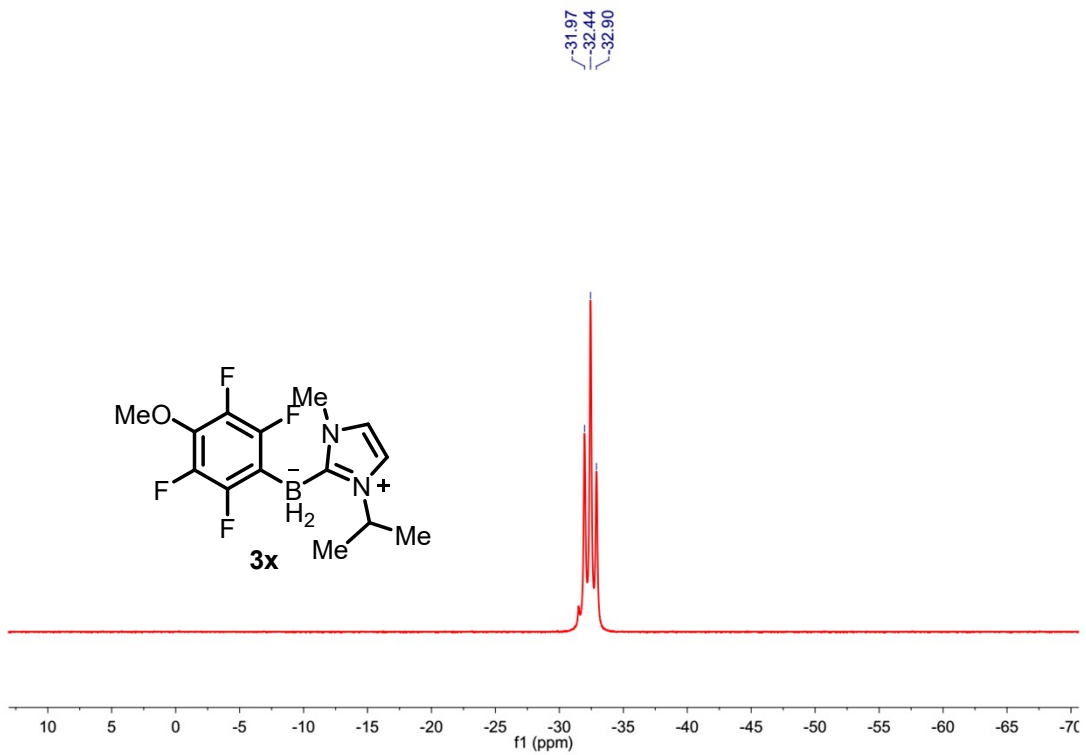

<sup>11</sup>B NMR (193 MHz, CDCl<sub>3</sub>)

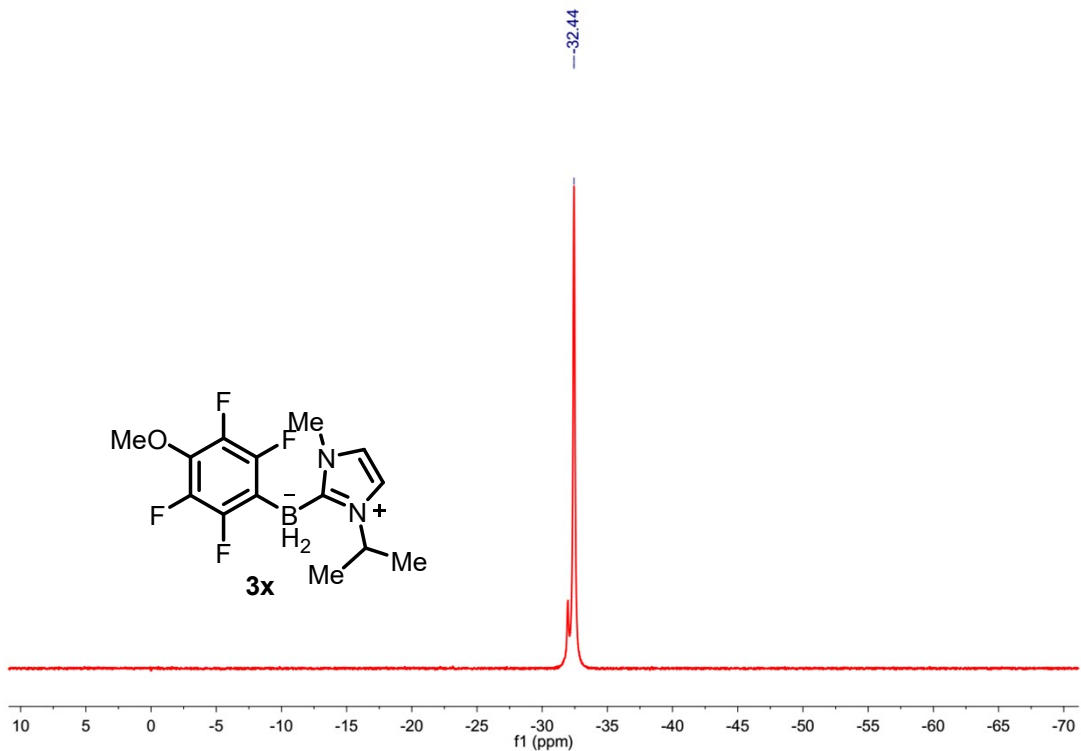

<sup>11</sup>B{<sup>1</sup>H} NMR (193 MHz, CDCl<sub>3</sub>)

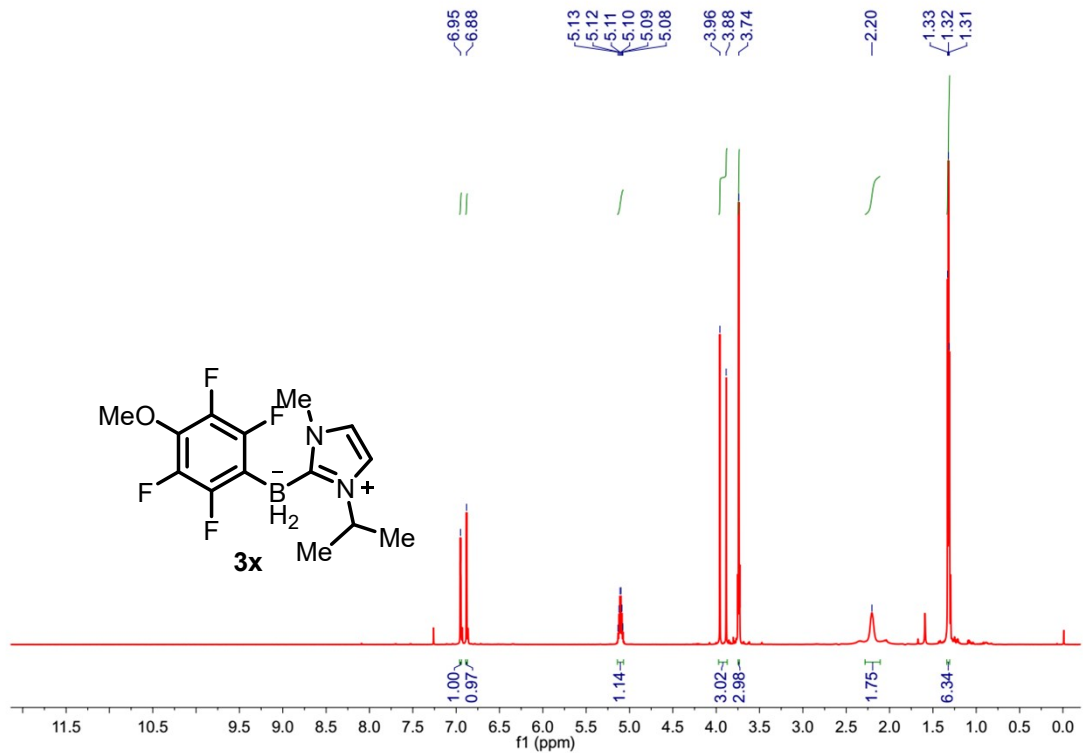

$^1\text{H}\{^{11}\text{B}\}$  NMR (600 MHz,  $\text{CDCl}_3$ )

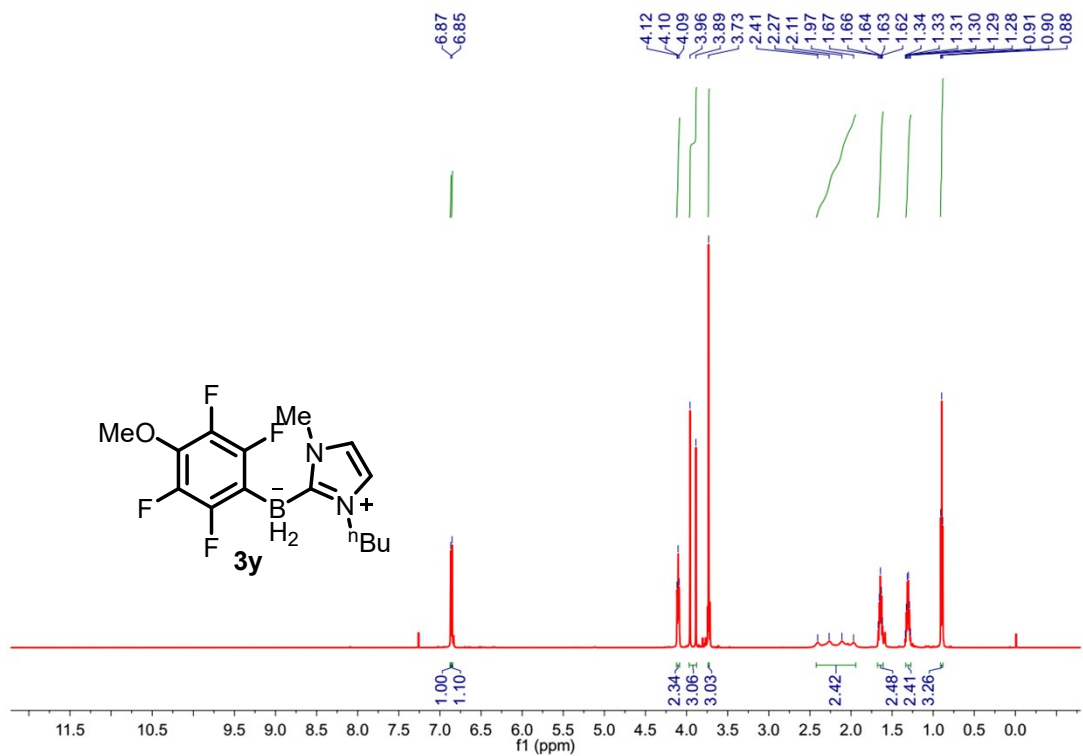

$^1\text{H}$  NMR (600 MHz,  $\text{CDCl}_3$ )

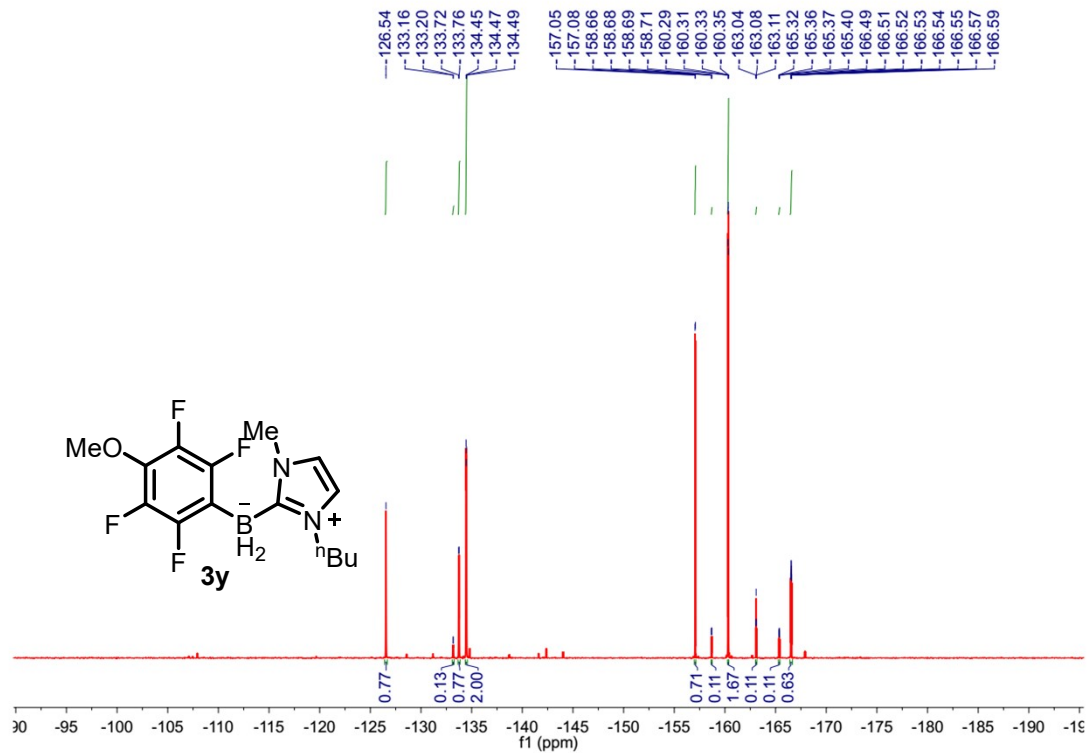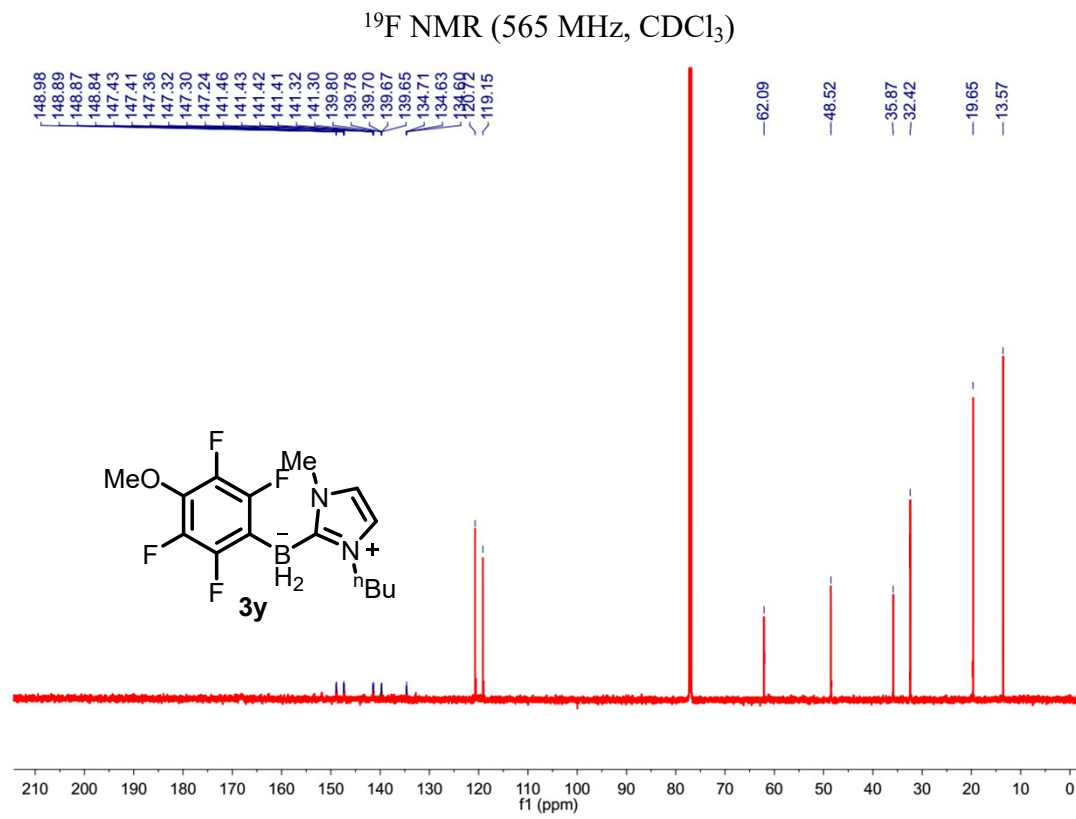

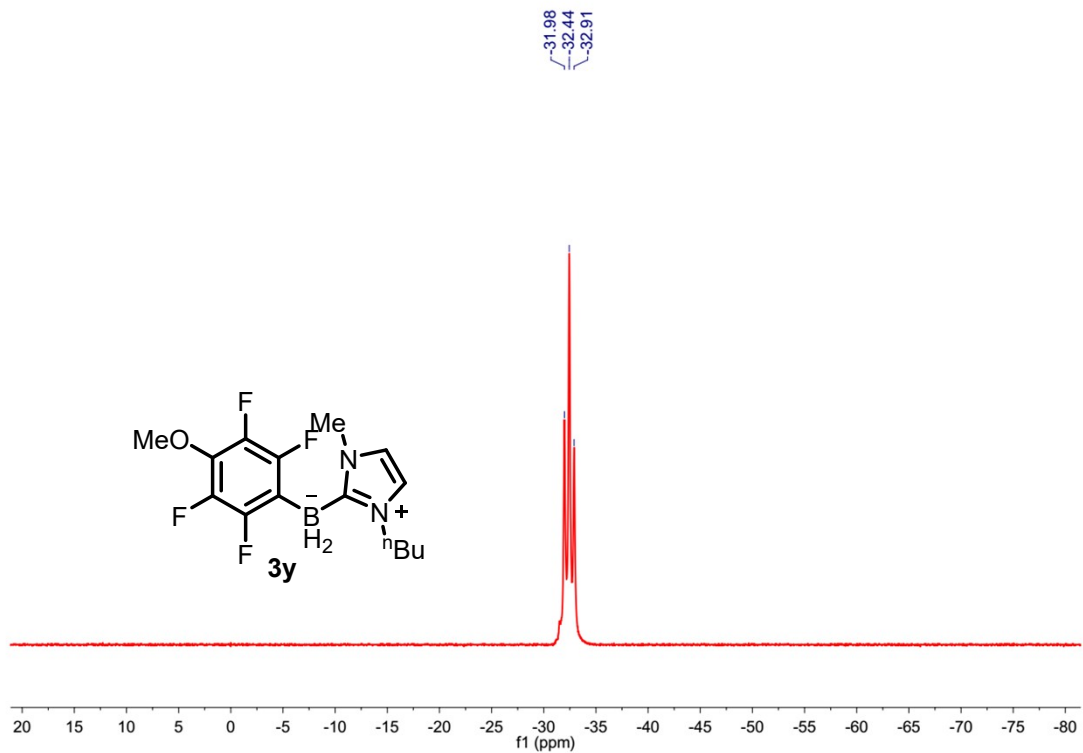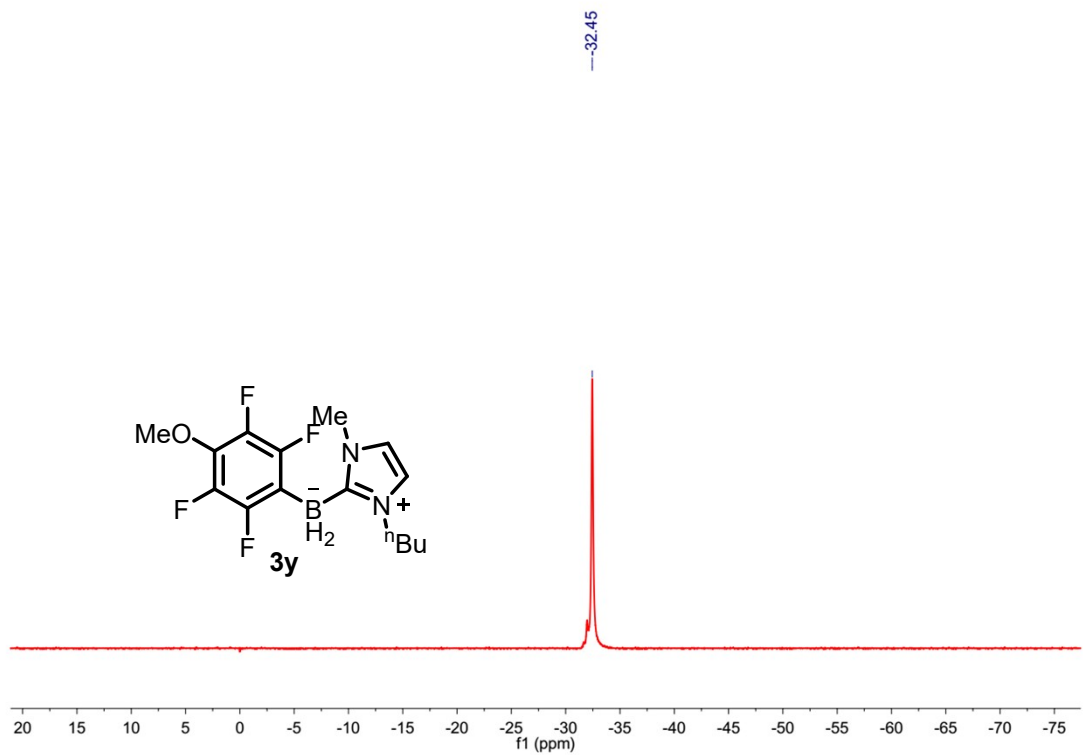

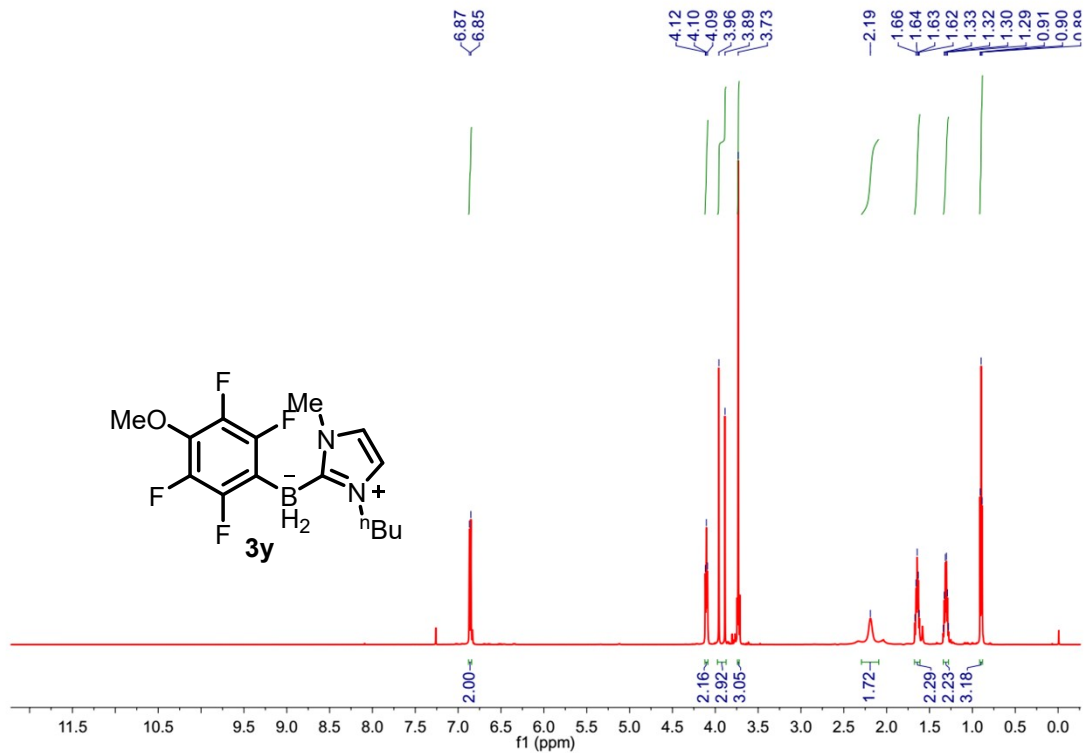

$^1\text{H}\{^{11}\text{B}\}$  NMR (600 MHz,  $\text{CDCl}_3$ )

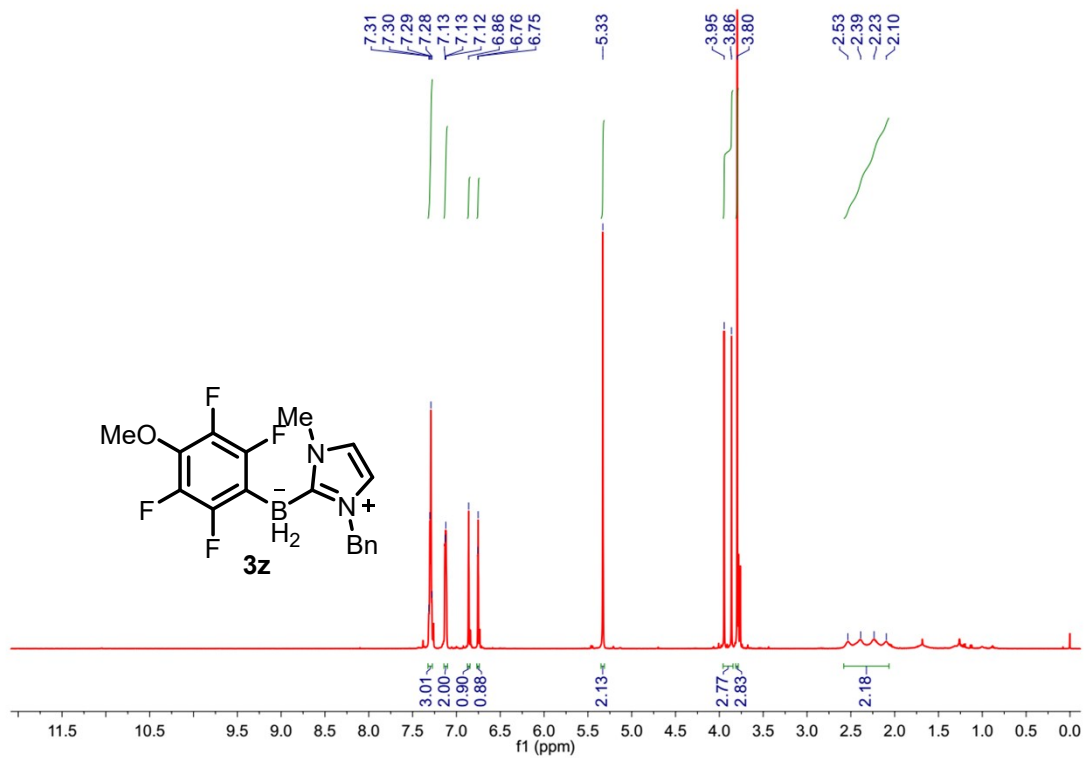

$^1\text{H}$  NMR (600 MHz,  $\text{CDCl}_3$ )



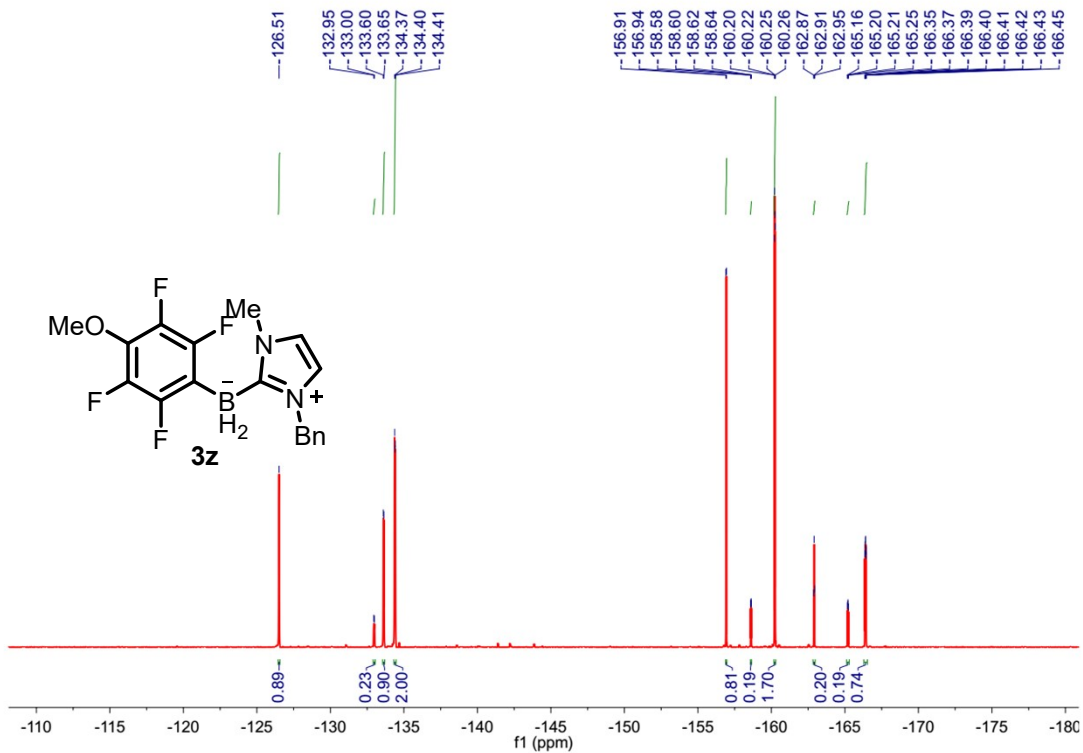

<sup>19</sup>F NMR (565 MHz, CDCl<sub>3</sub>)

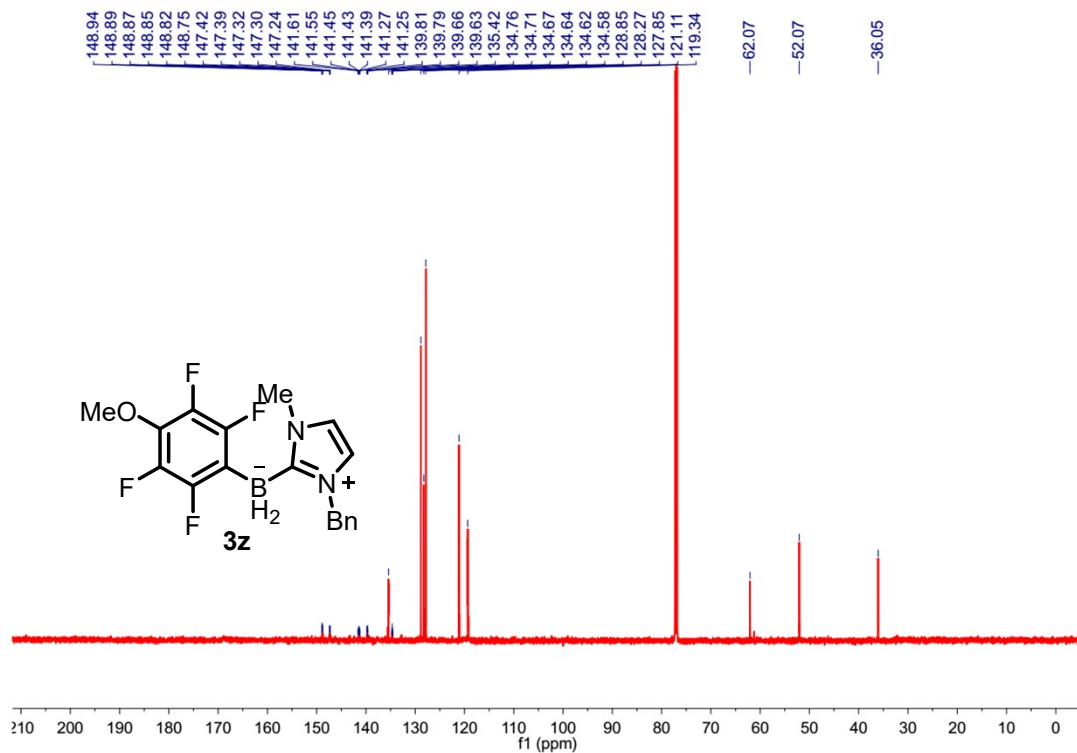

<sup>13</sup>C NMR (151 MHz, CDCl<sub>3</sub>)

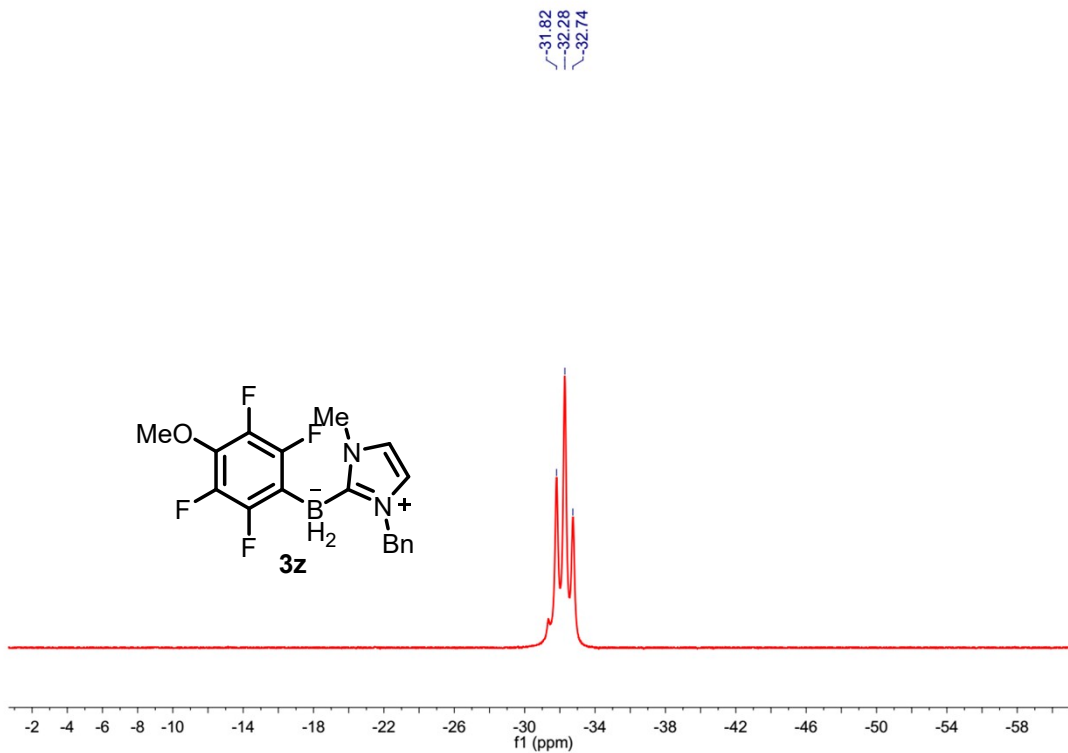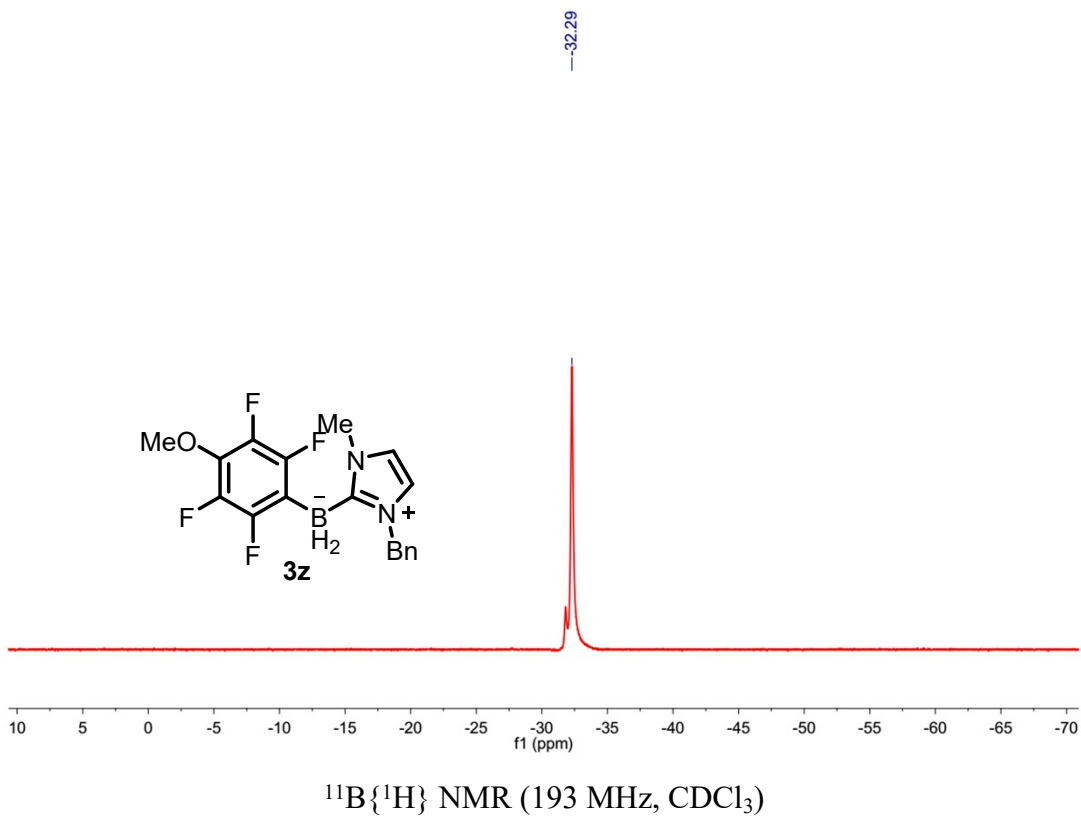

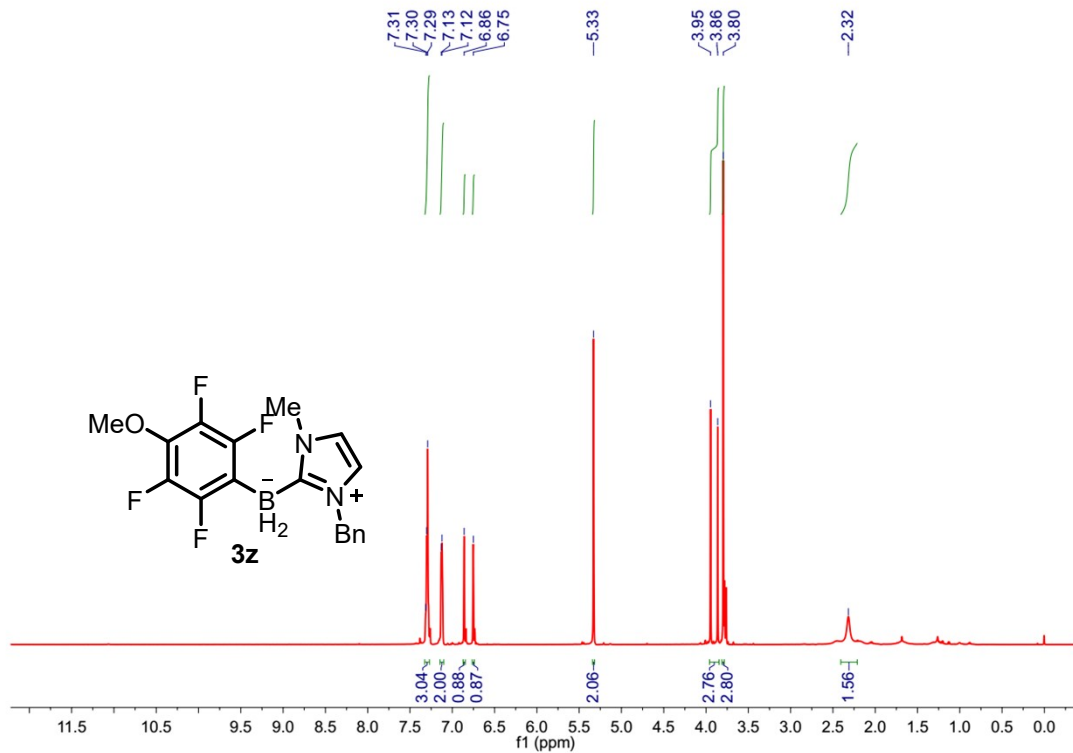

$^1\text{H}\{^{11}\text{B}\}$  NMR (600 MHz,  $\text{CDCl}_3$ )

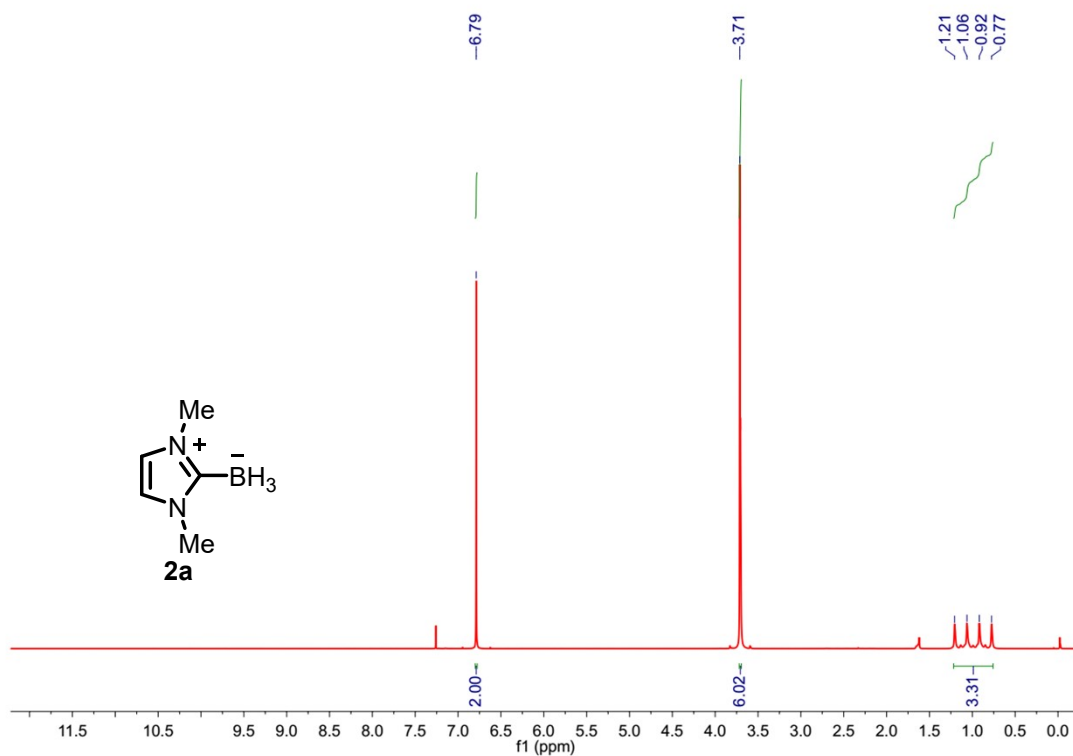

$^1\text{H}$  NMR (600 MHz,  $\text{CDCl}_3$ )

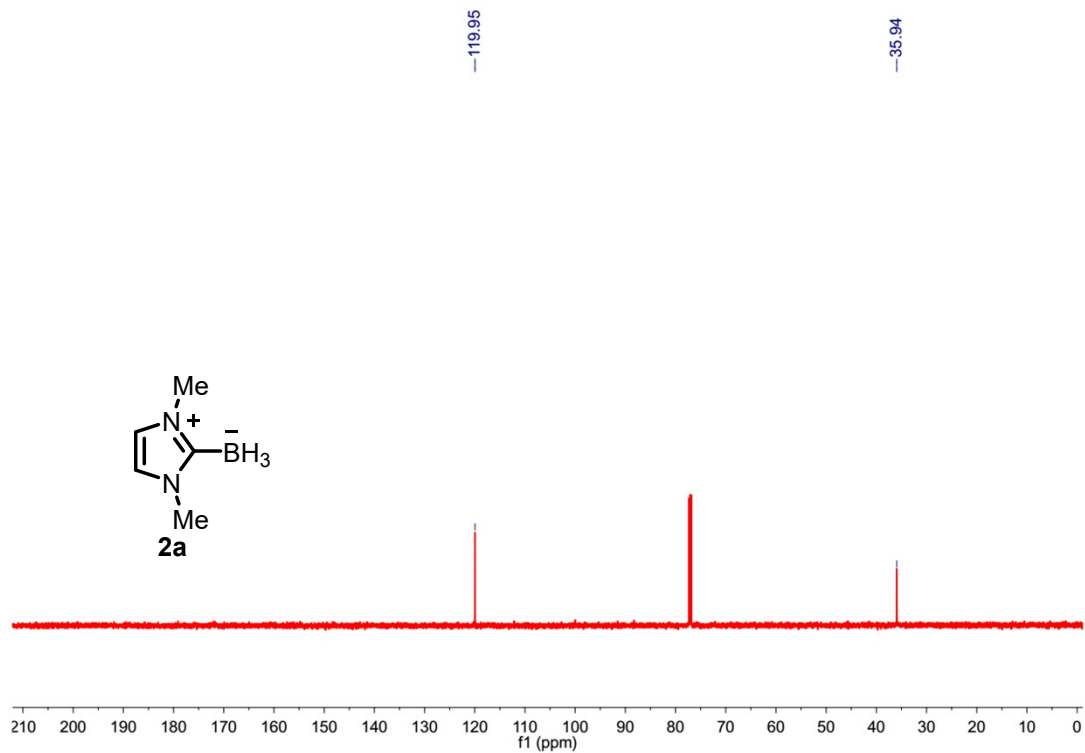

$^{13}\text{C}$  NMR (151 MHz,  $\text{CDCl}_3$ )

36.81  
37.26  
37.71  
38.16

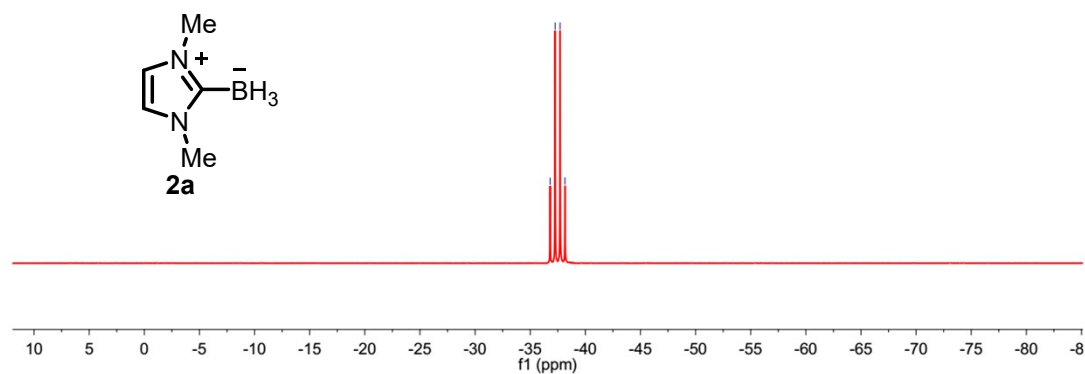

$^{11}\text{B}$  NMR (193 MHz,  $\text{CDCl}_3$ )

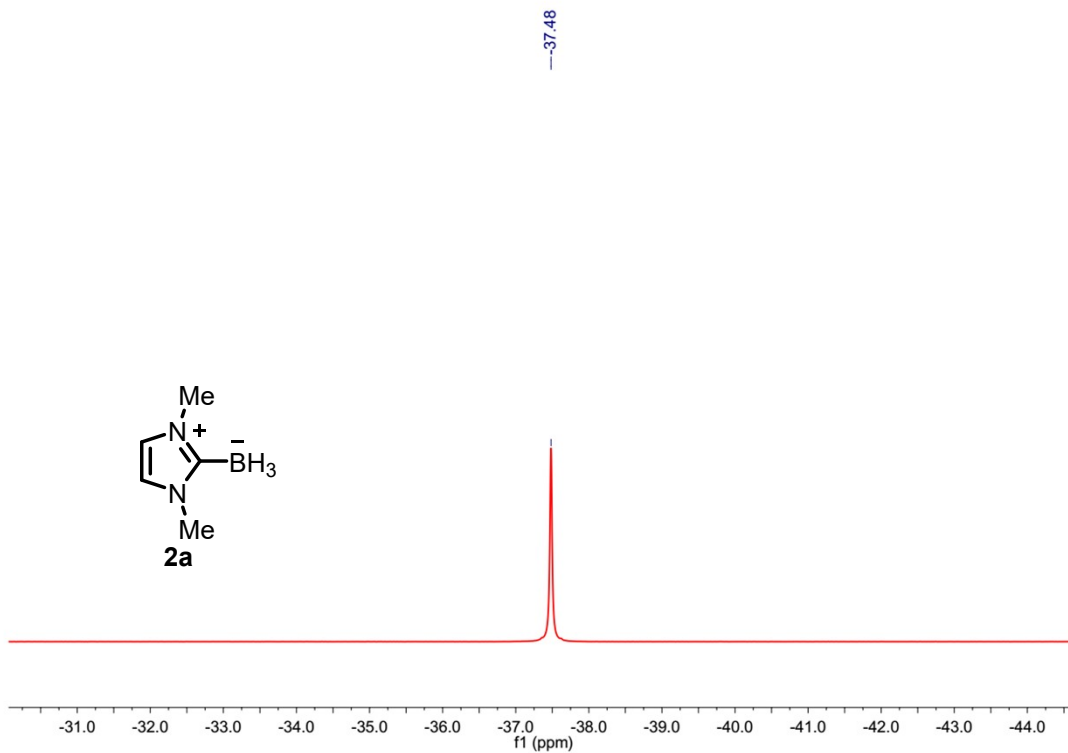

$^{11}\text{B}\{^1\text{H}\}$  NMR (193 MHz, CDCl<sub>3</sub>)

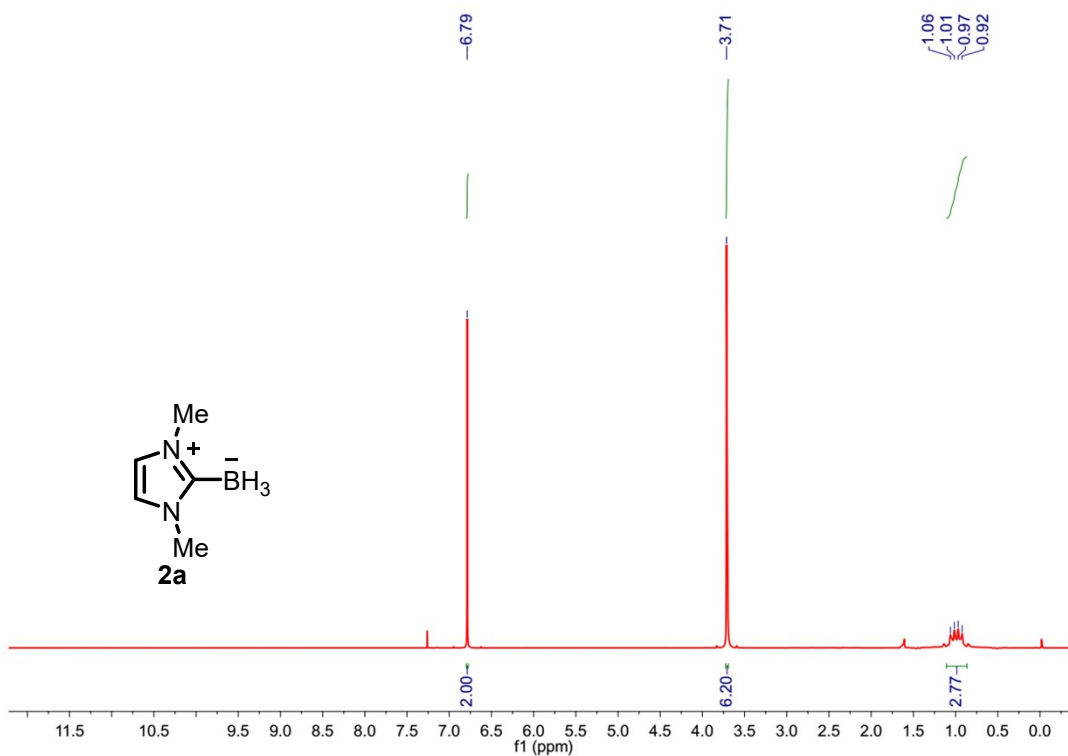

$^1\text{H}\{^{11}\text{B}\}$  NMR (600 MHz, CDCl<sub>3</sub>)

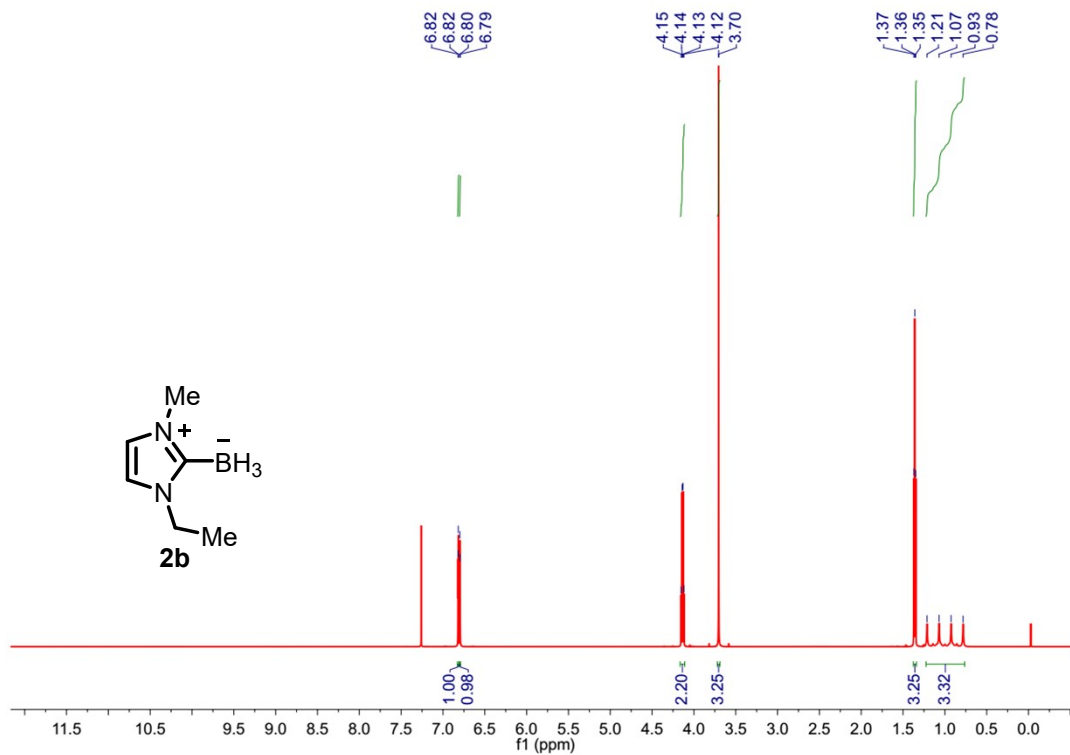

$^1\text{H NMR}$  (600 MHz,  $\text{CDCl}_3$ )

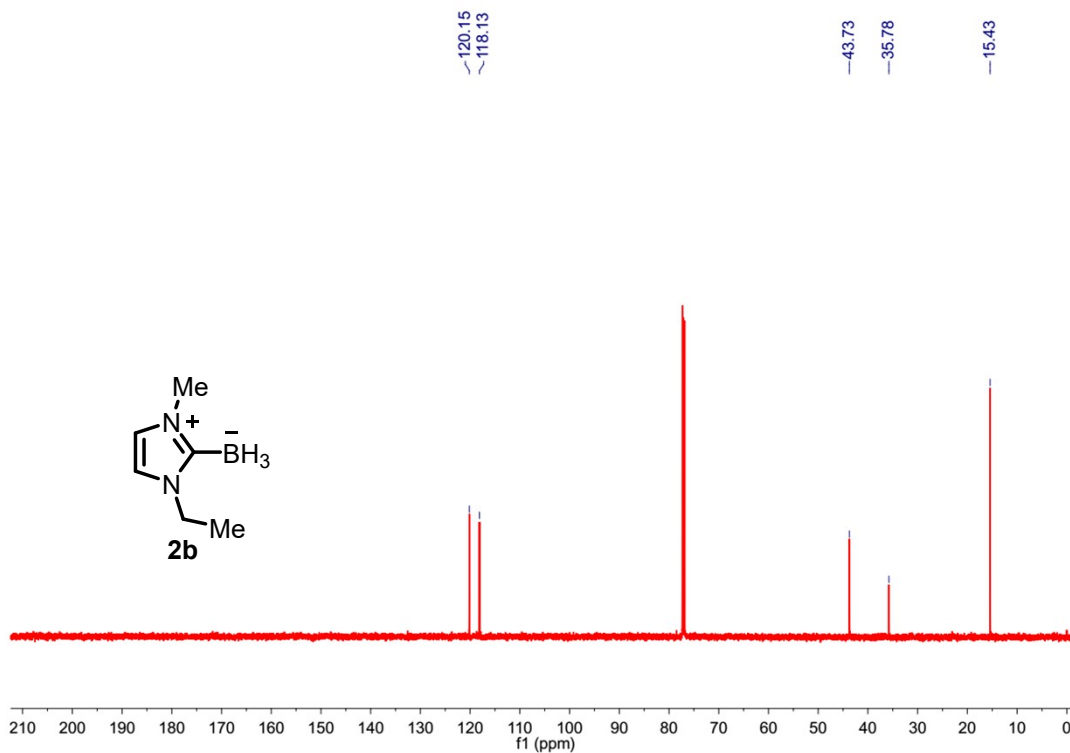

$^{13}\text{C NMR}$  (151 MHz,  $\text{CDCl}_3$ )

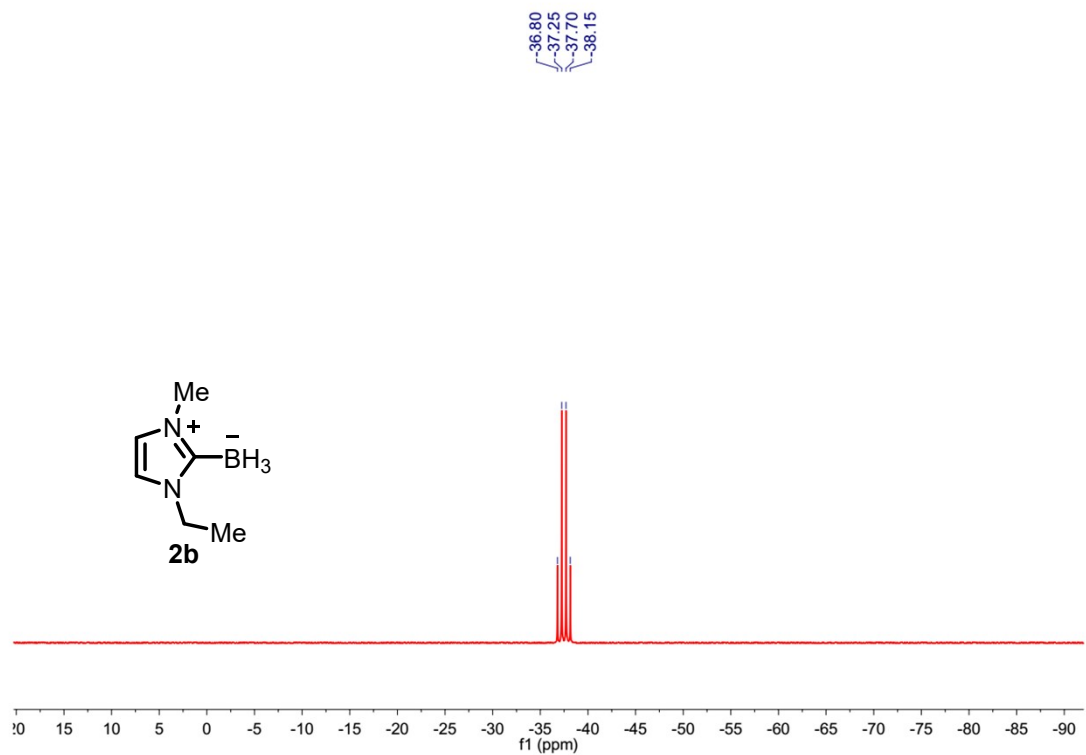

<sup>11</sup>B NMR (193 MHz, CDCl<sub>3</sub>)

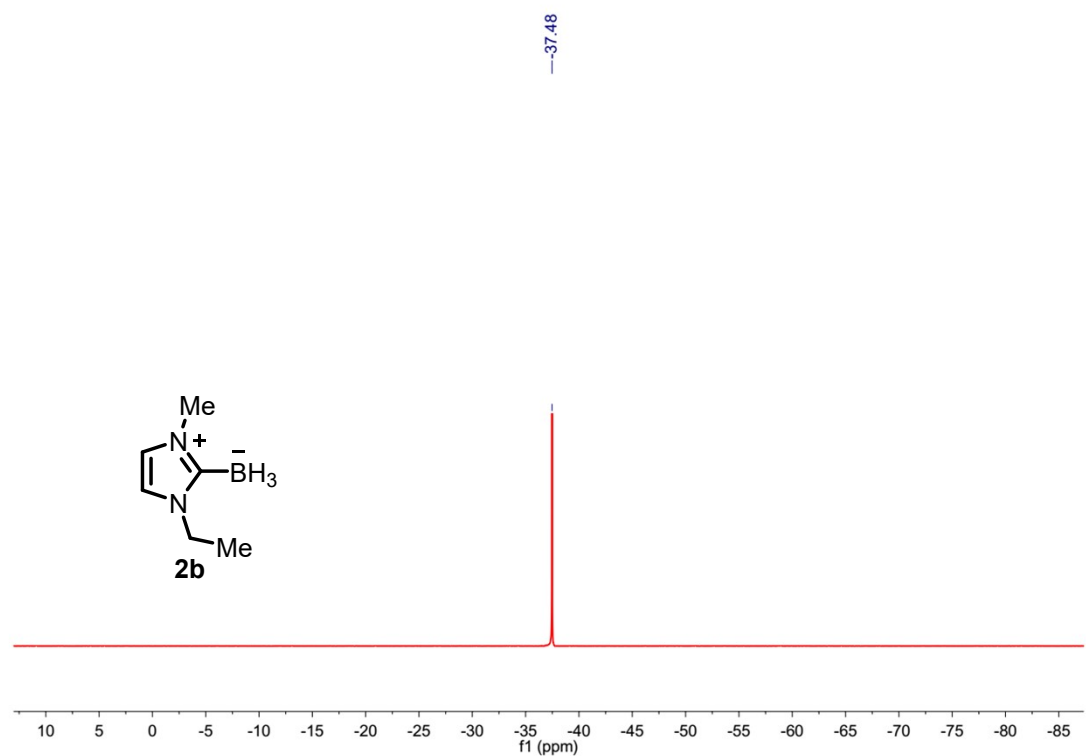

<sup>11</sup>B{<sup>1</sup>H} NMR (193 MHz, CDCl<sub>3</sub>)

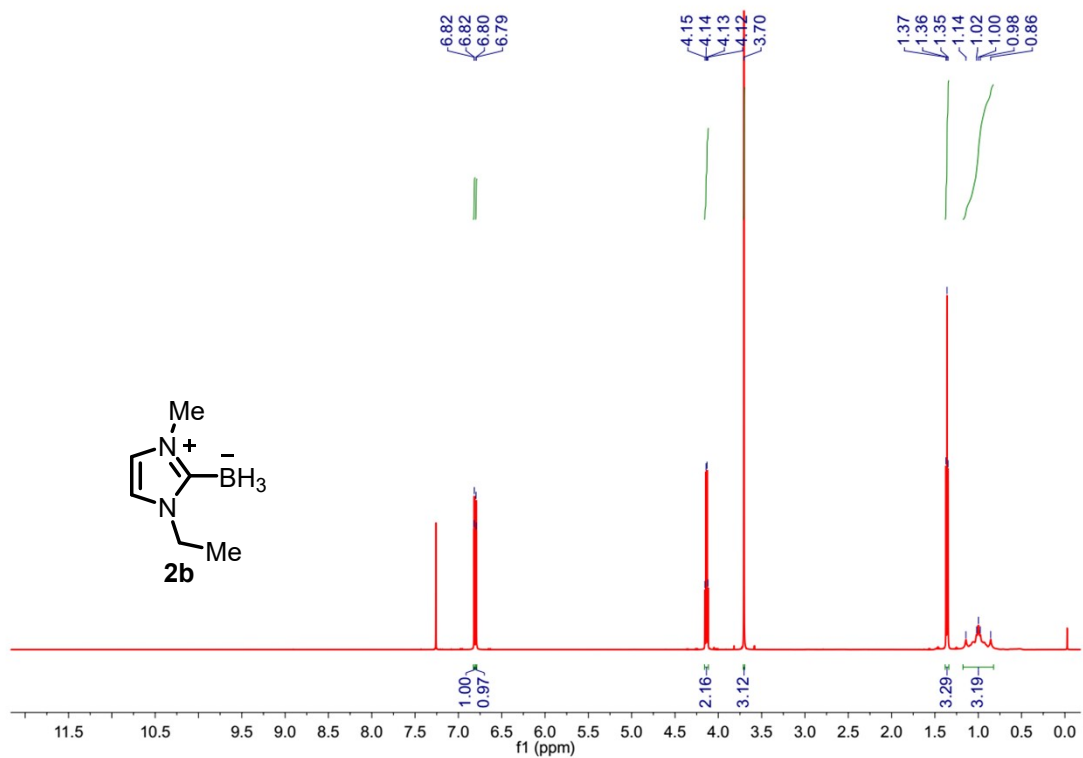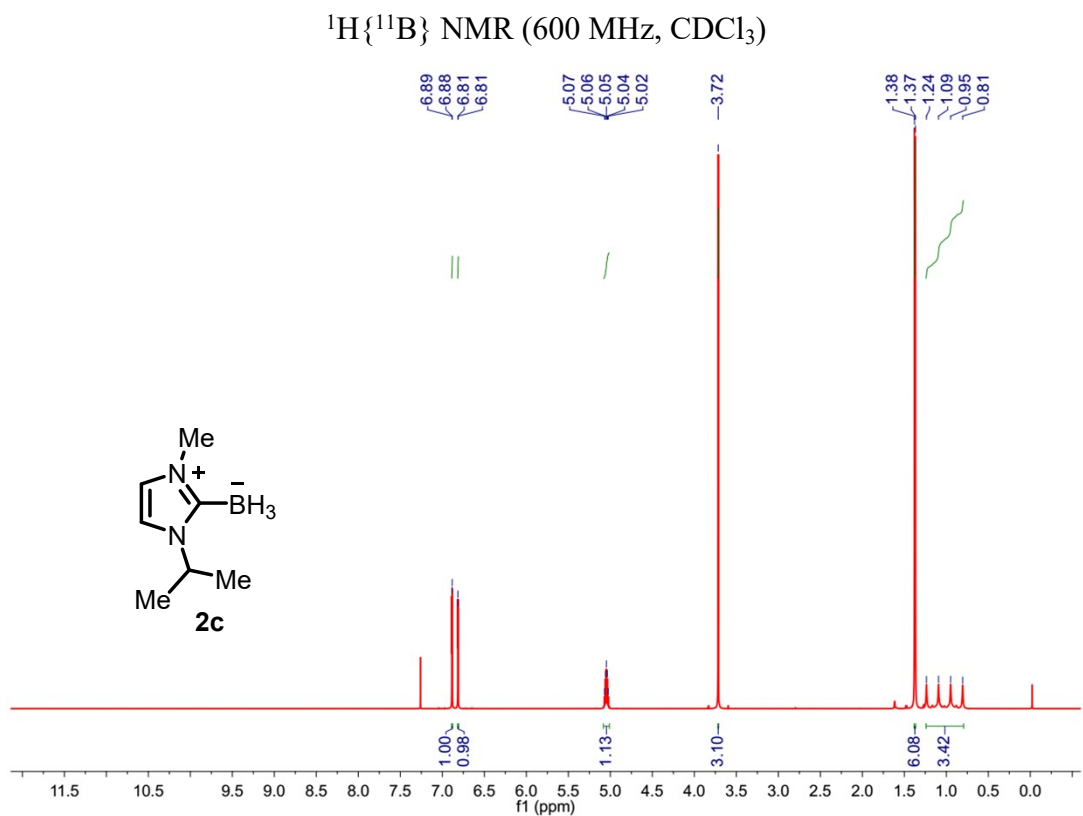



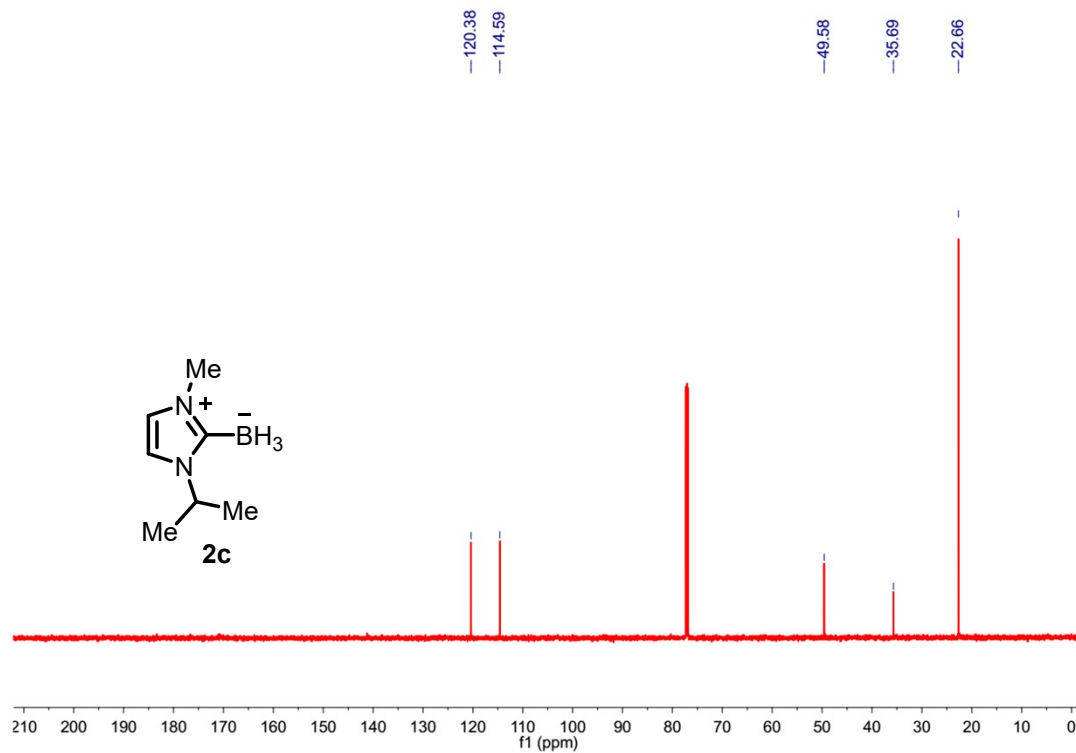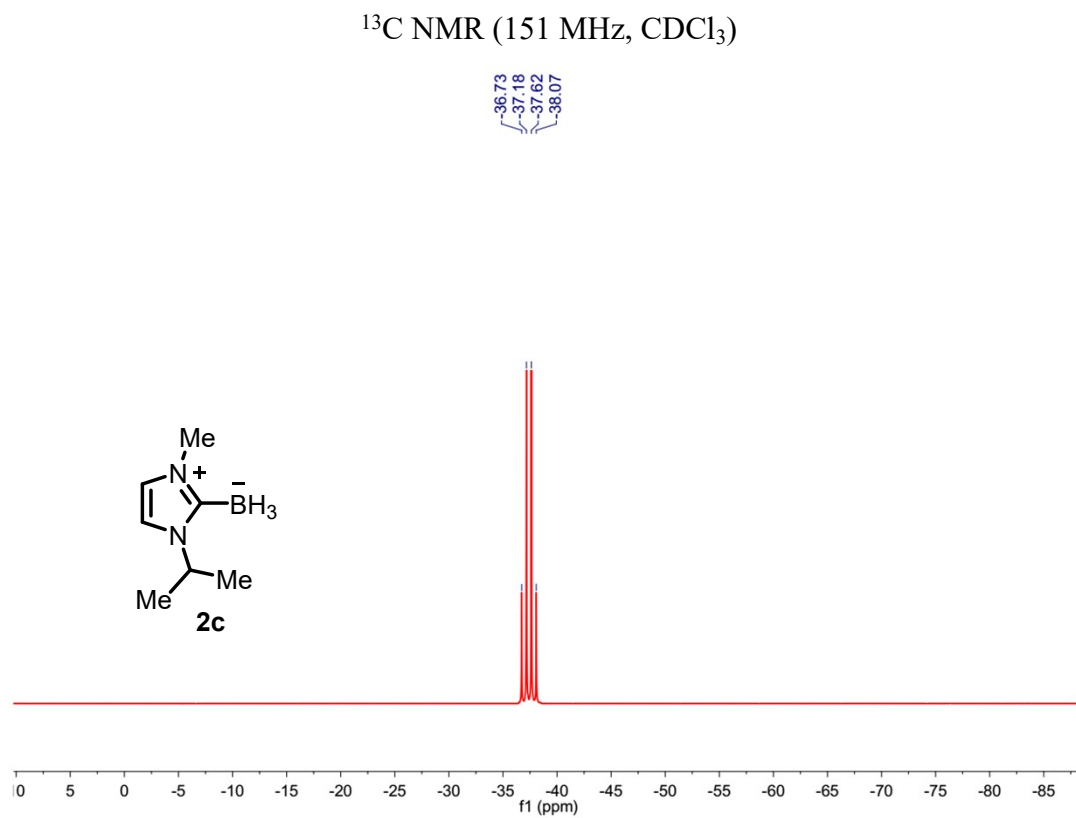

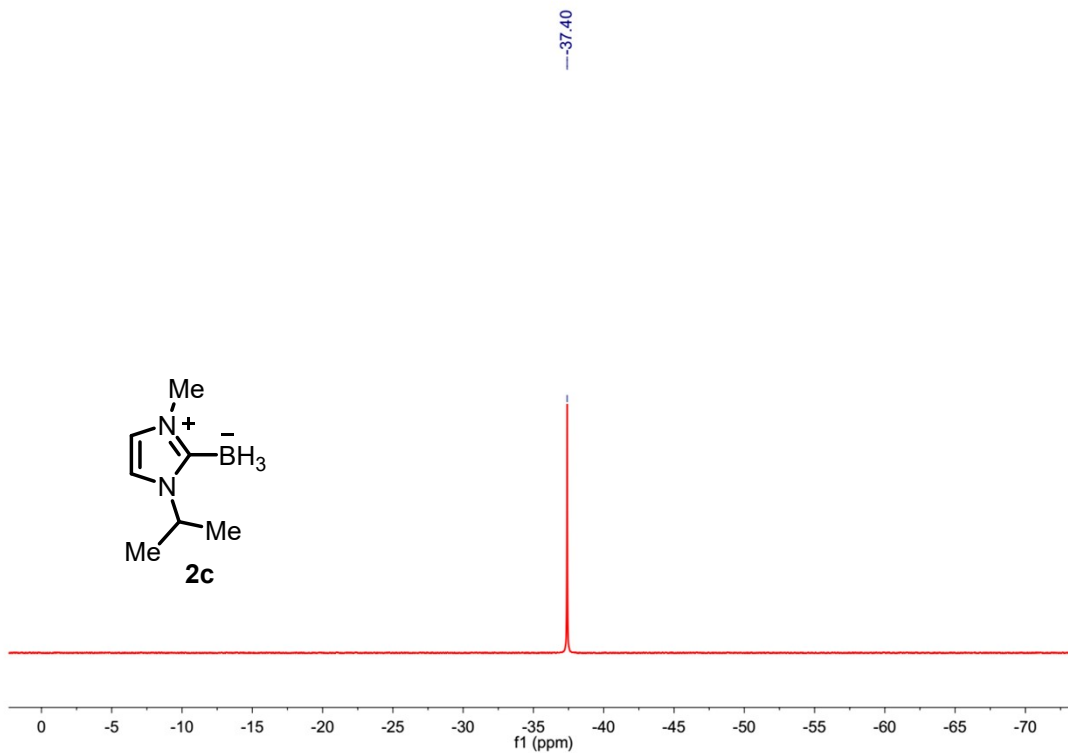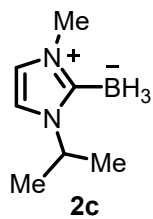

$^{11}\text{B}\{^1\text{H}\}$  NMR (193 MHz,  $\text{CDCl}_3$ )

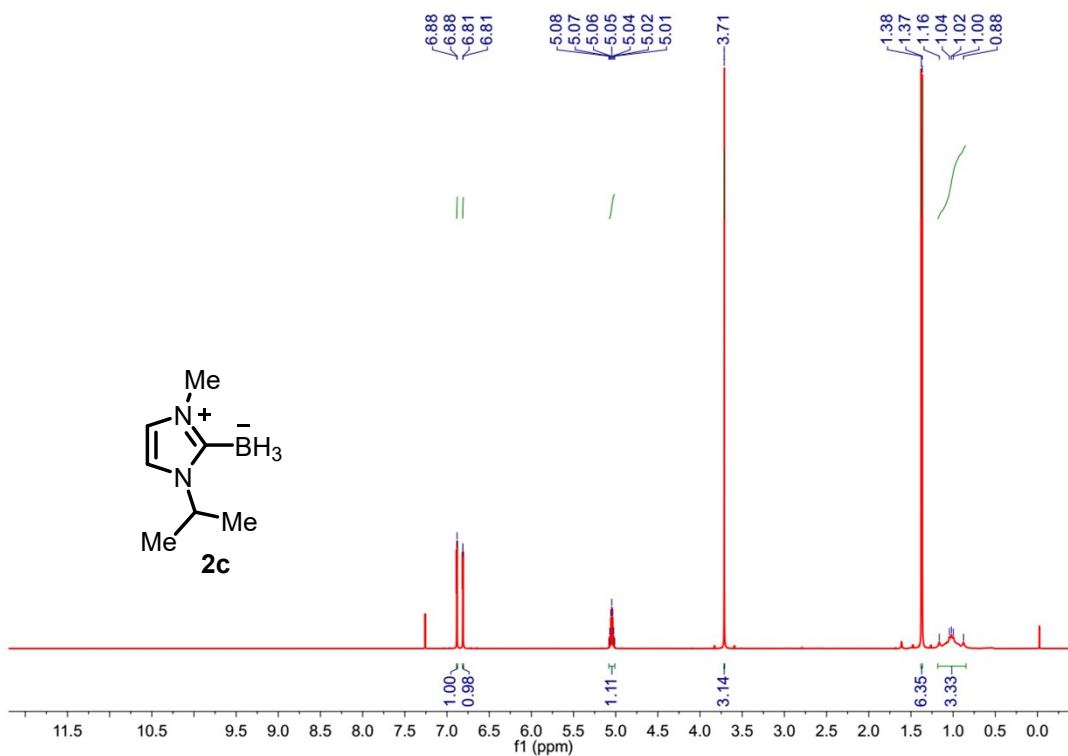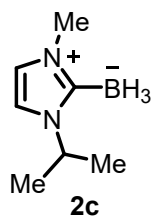

$^1\text{H}\{^{11}\text{B}\}$  NMR (600 MHz,  $\text{CDCl}_3$ )

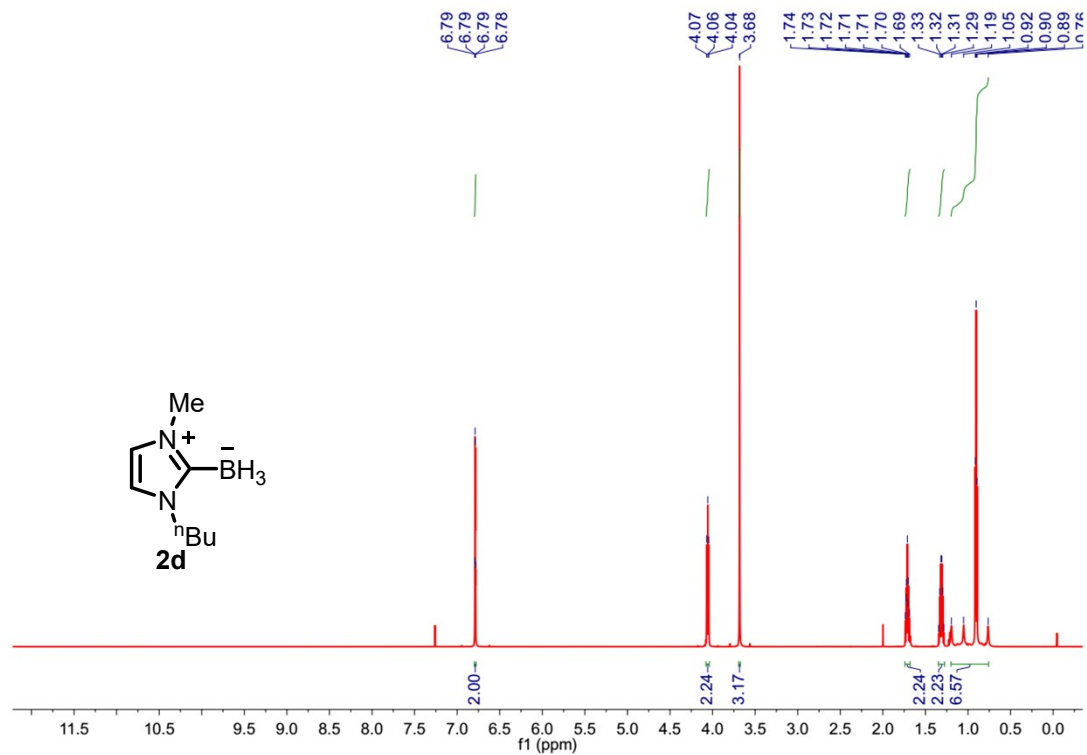

<sup>1</sup>H NMR (600 MHz, CDCl<sub>3</sub>)

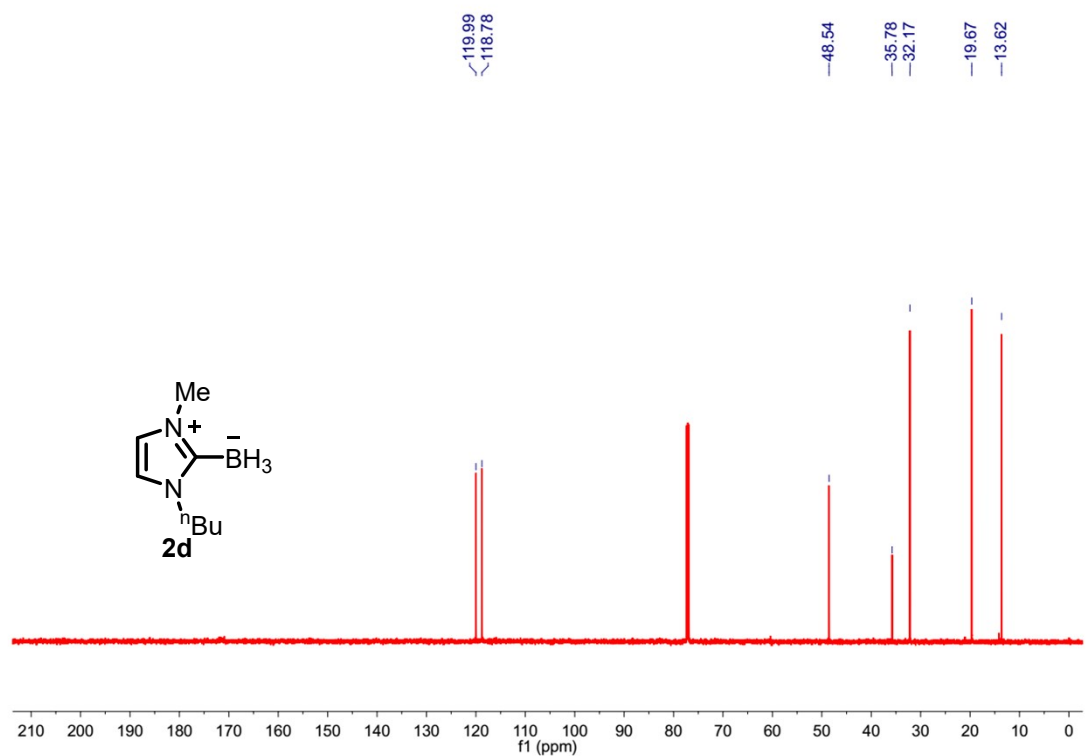

<sup>13</sup>C NMR (151 MHz, CDCl<sub>3</sub>)

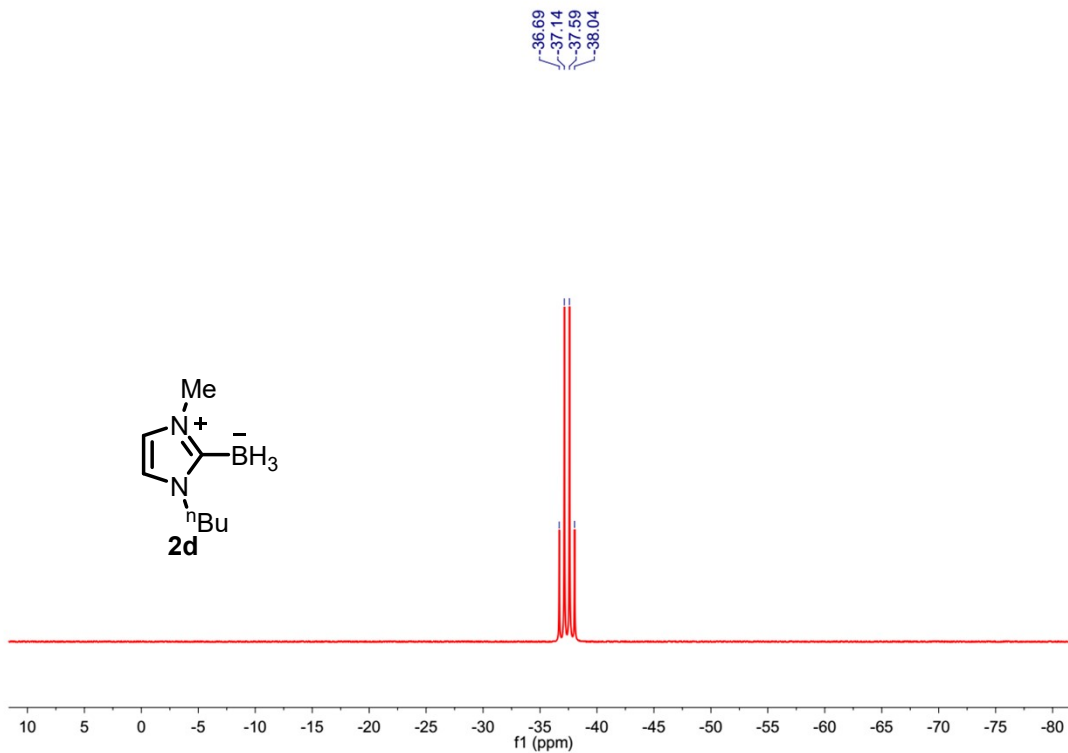

<sup>11</sup>B NMR (193 MHz, CDCl<sub>3</sub>)

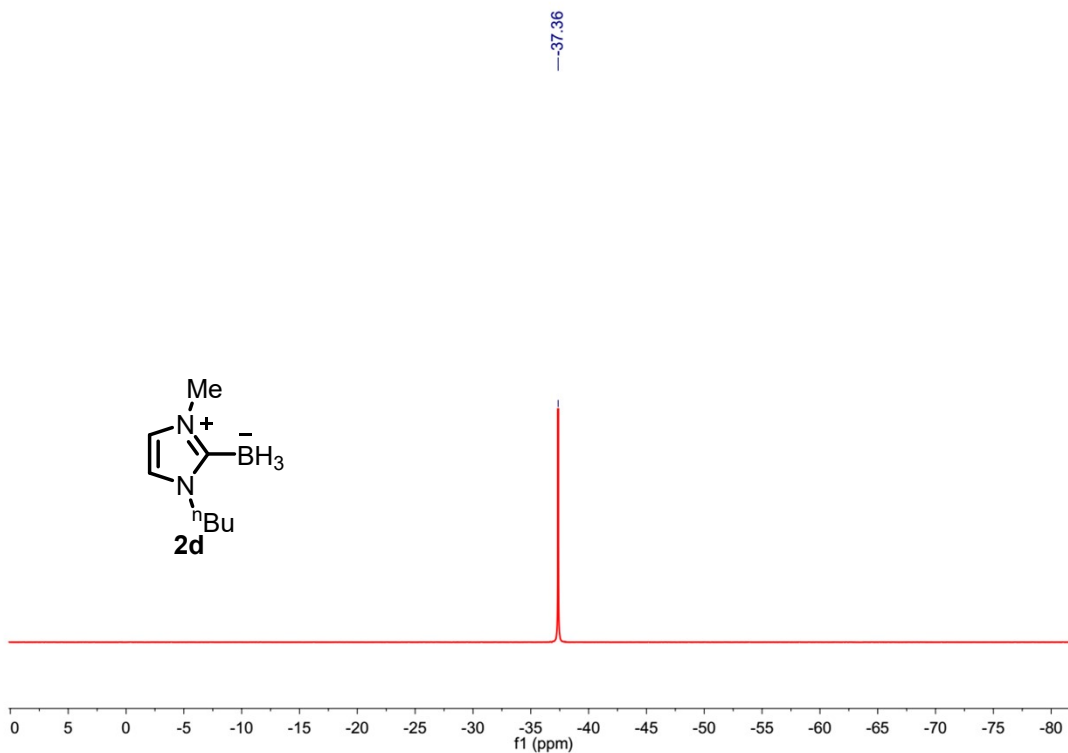

<sup>11</sup>B{<sup>1</sup>H} NMR (193 MHz, CDCl<sub>3</sub>)

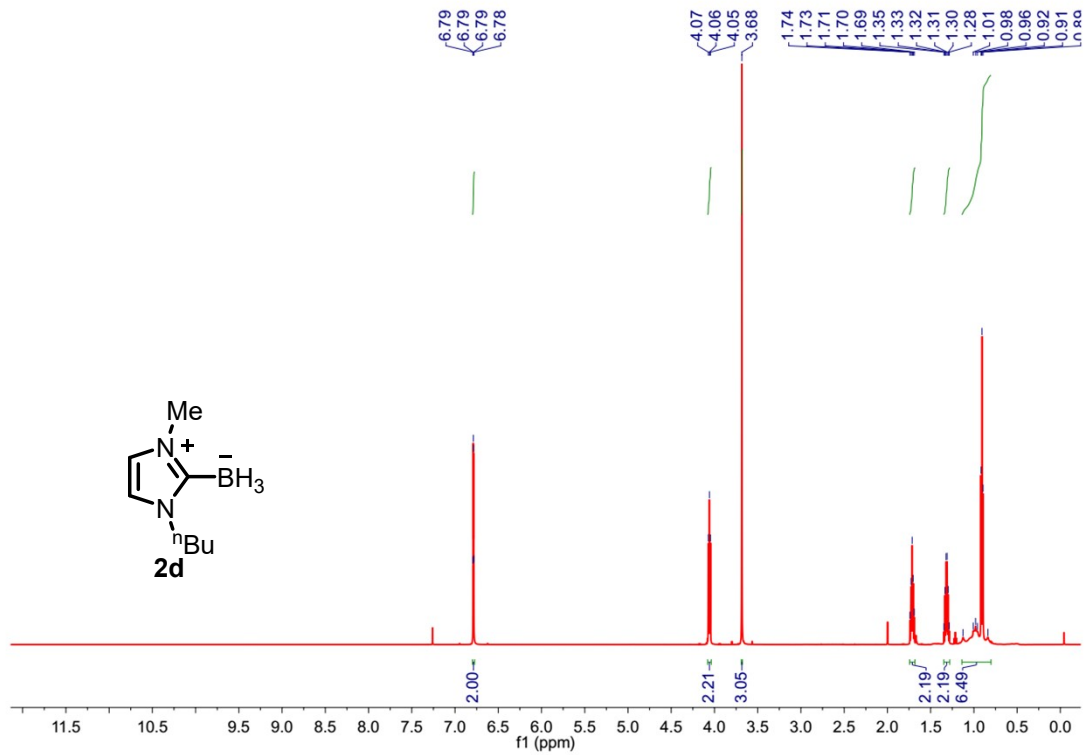

$^1\text{H}\{^{11}\text{B}\}$  NMR (600 MHz,  $\text{CDCl}_3$ )

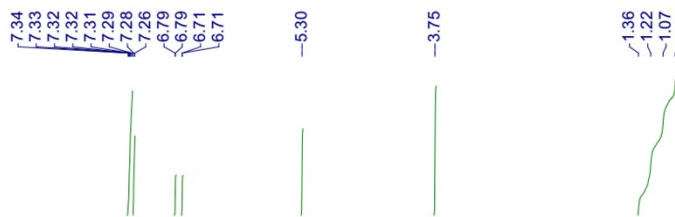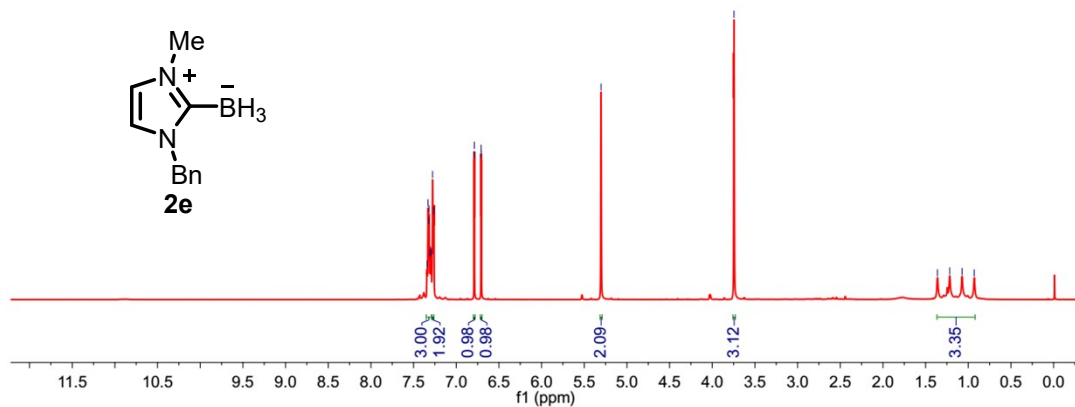

$^1\text{H}$  NMR (600 MHz,  $\text{CDCl}_3$ )

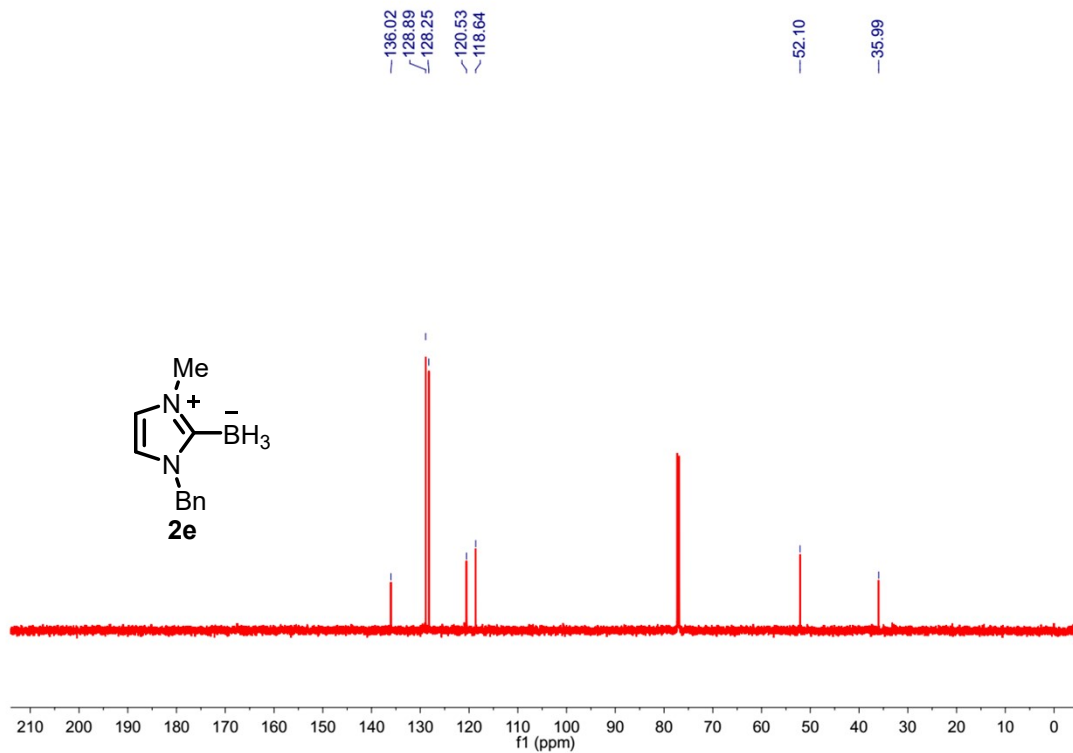

$^{13}\text{C}$  NMR (151 MHz,  $\text{CDCl}_3$ )

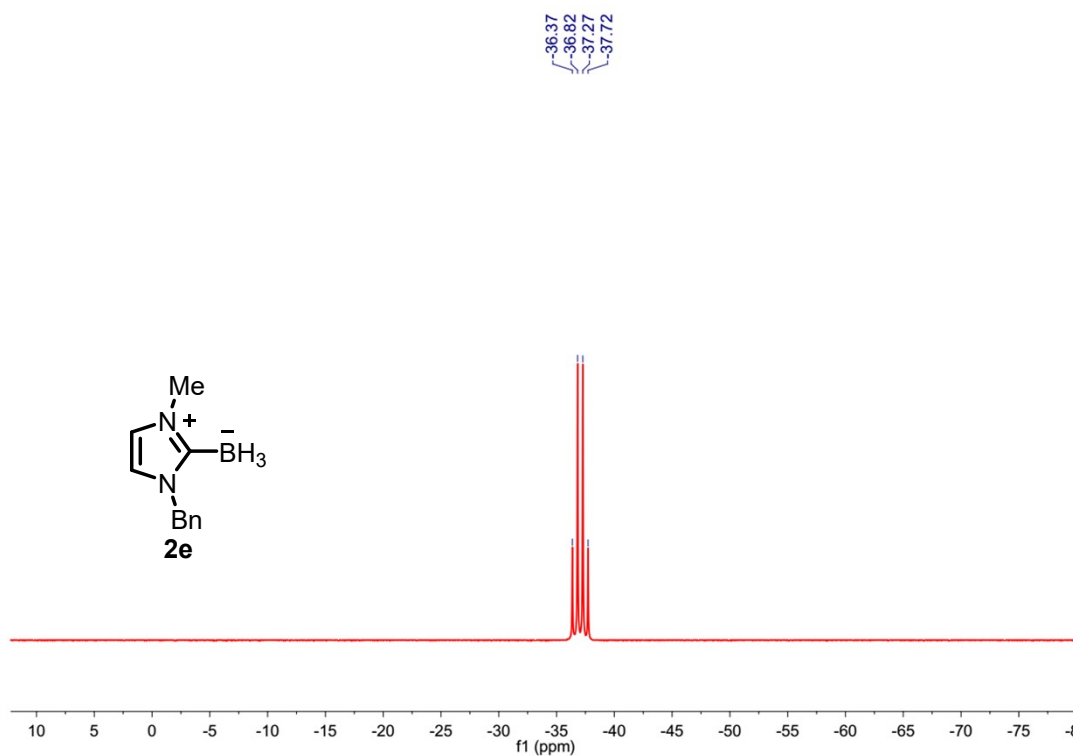

$^{11}\text{B}$  NMR (193 MHz,  $\text{CDCl}_3$ )

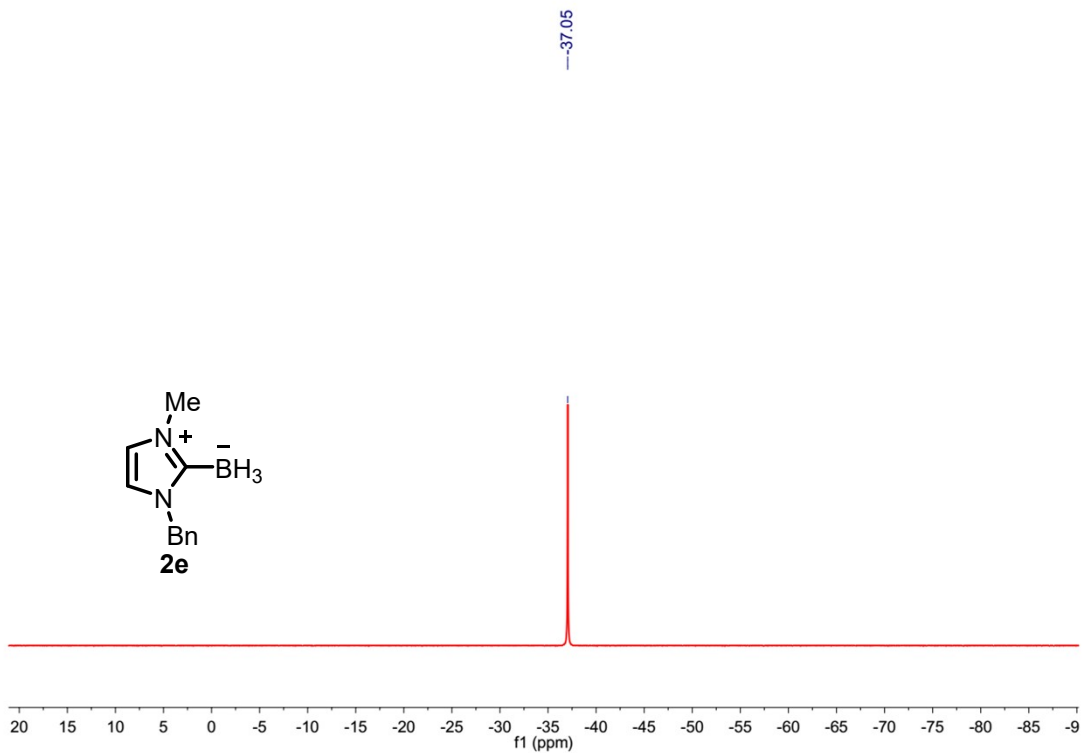

$^{11}\text{B}\{^1\text{H}\}$  NMR (193 MHz,  $\text{CDCl}_3$ )

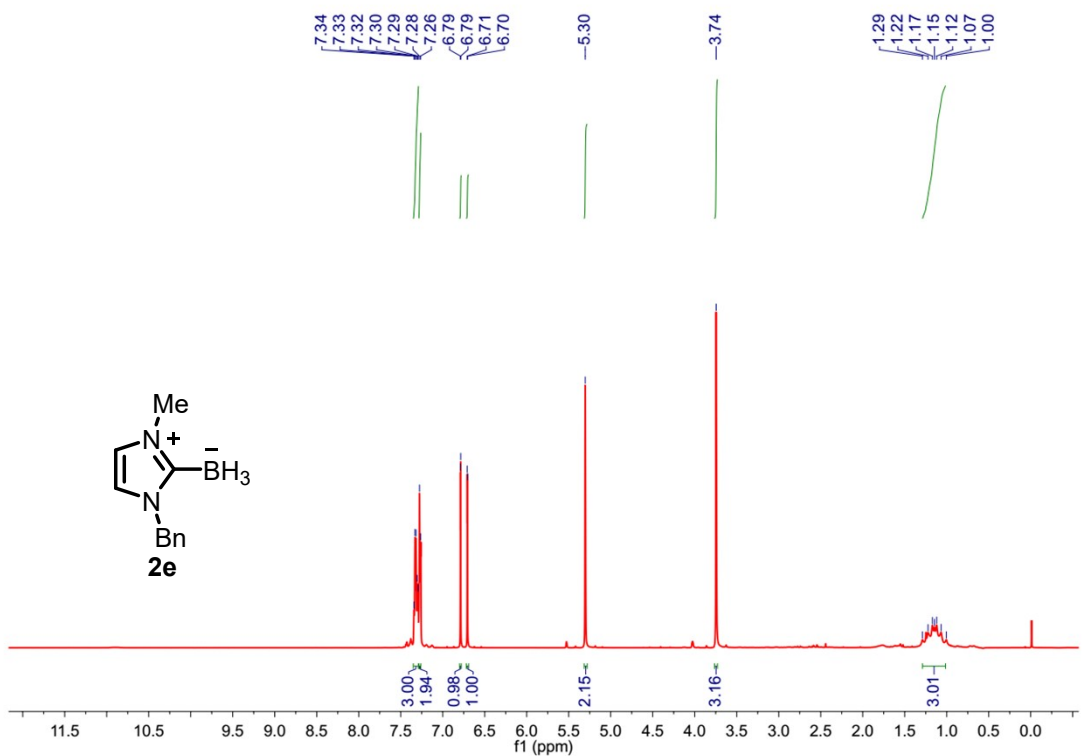

$^1\text{H}\{^{11}\text{B}\}$  NMR (600 MHz,  $\text{CDCl}_3$ )

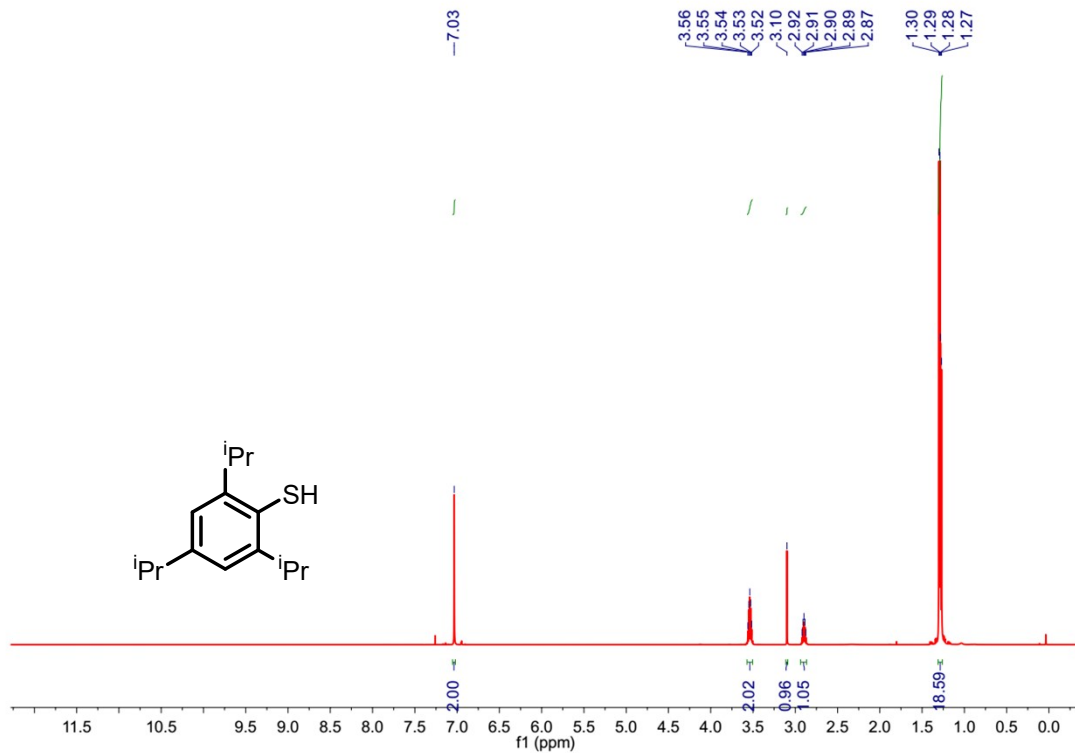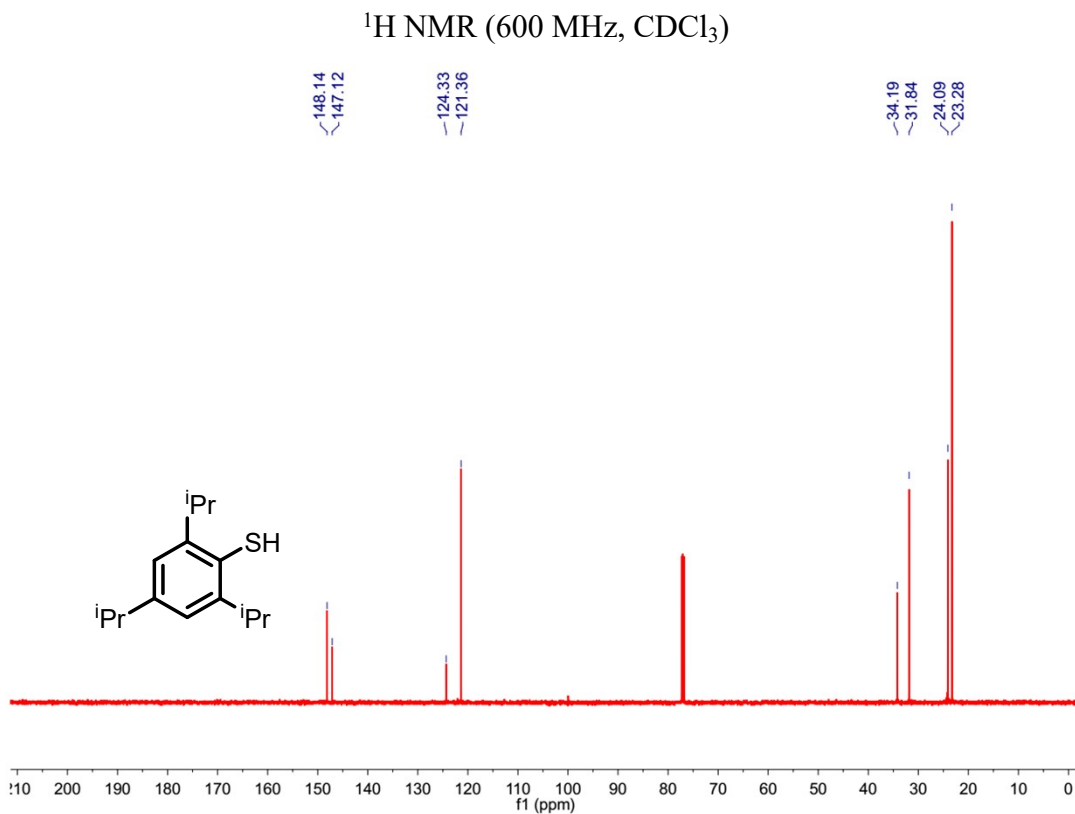



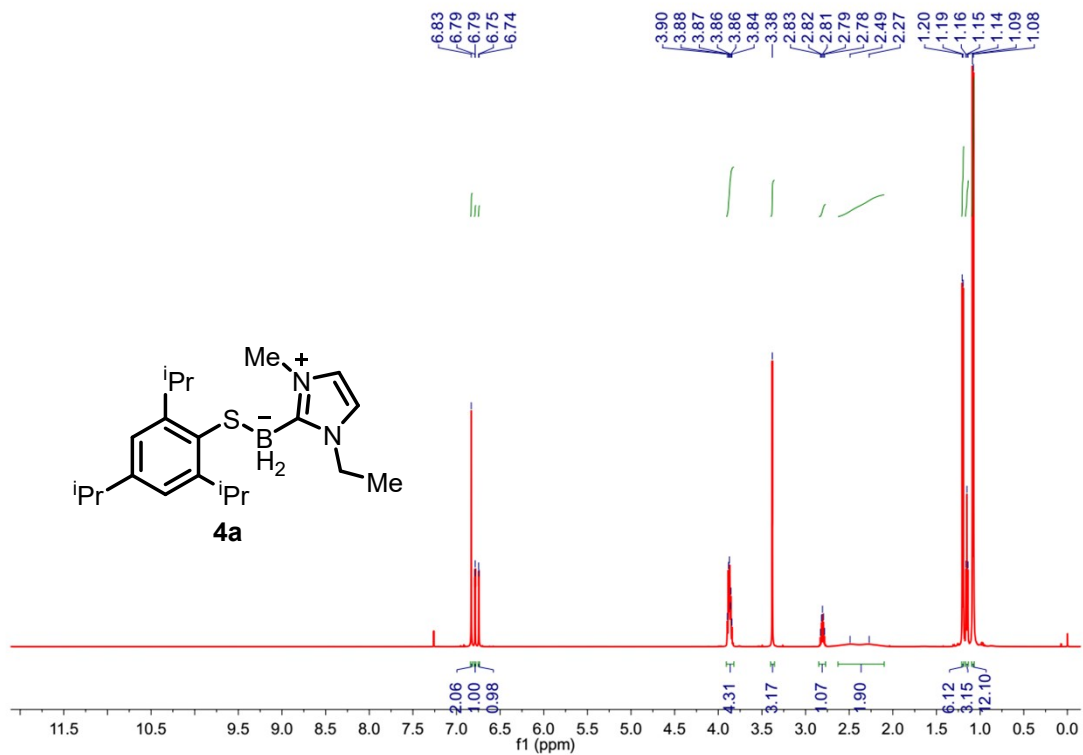

<sup>1</sup>H NMR (600 MHz, CDCl<sub>3</sub>)

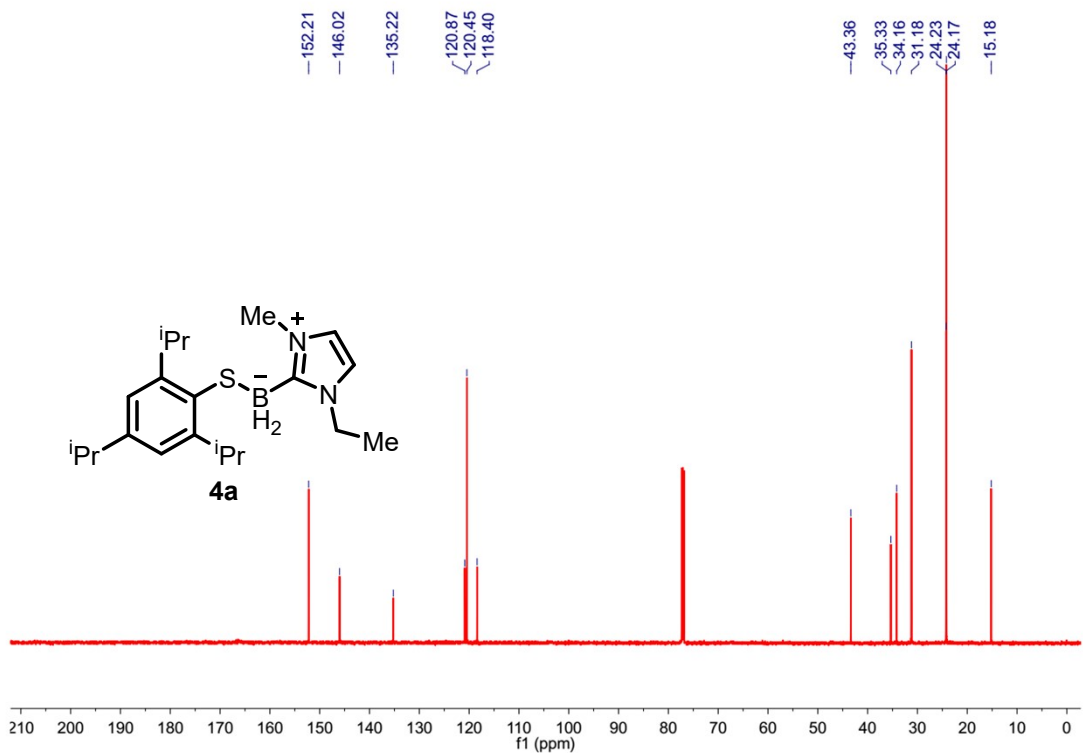

<sup>13</sup>C NMR (151 MHz, CDCl<sub>3</sub>)

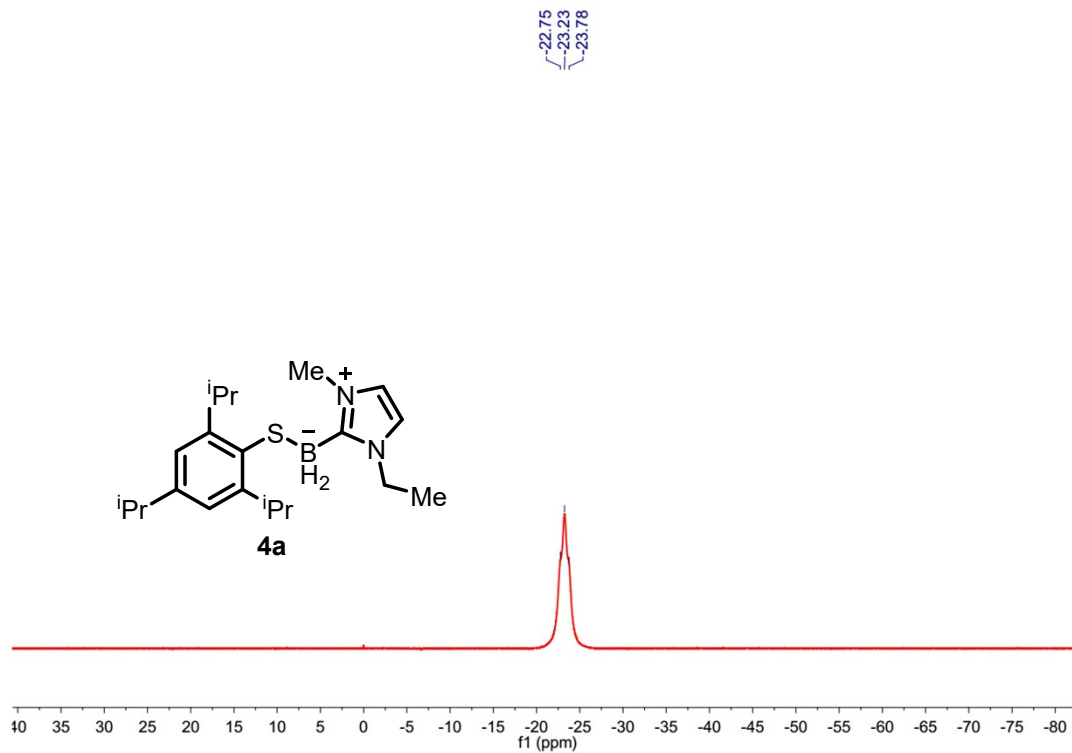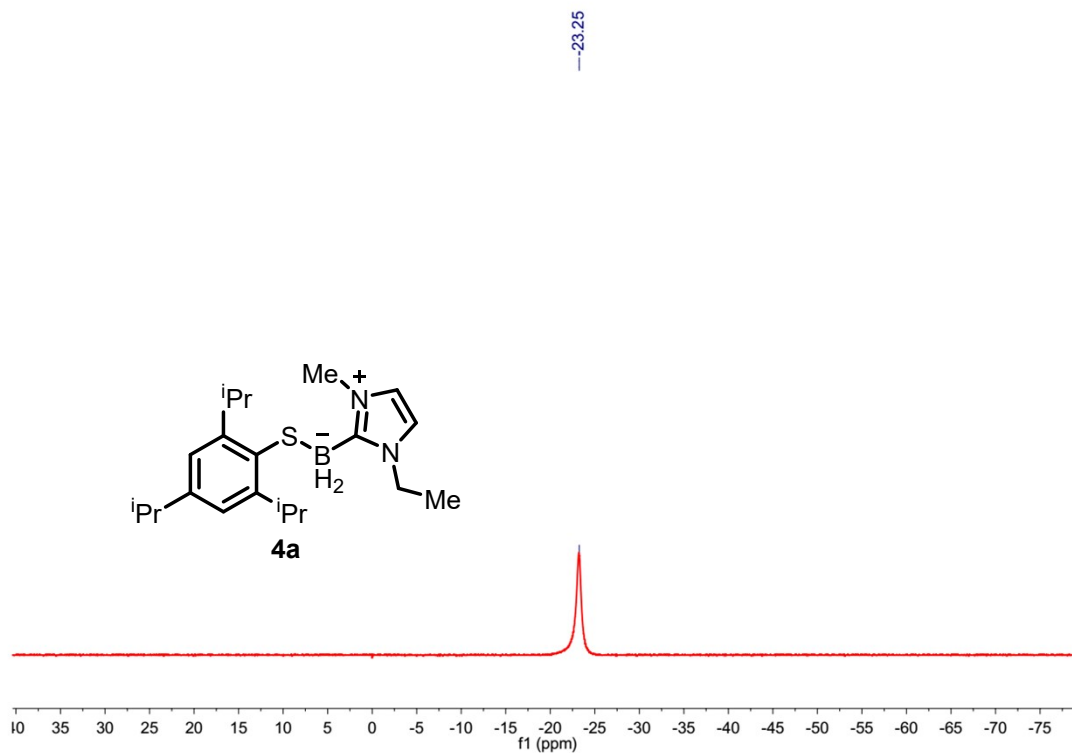

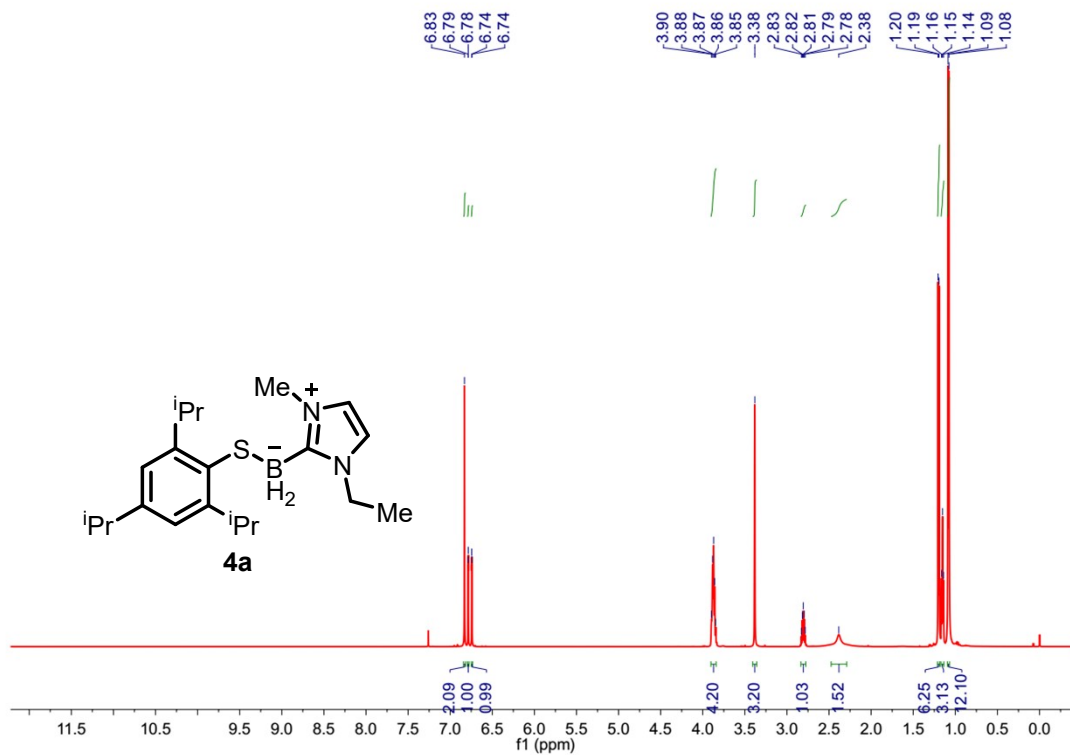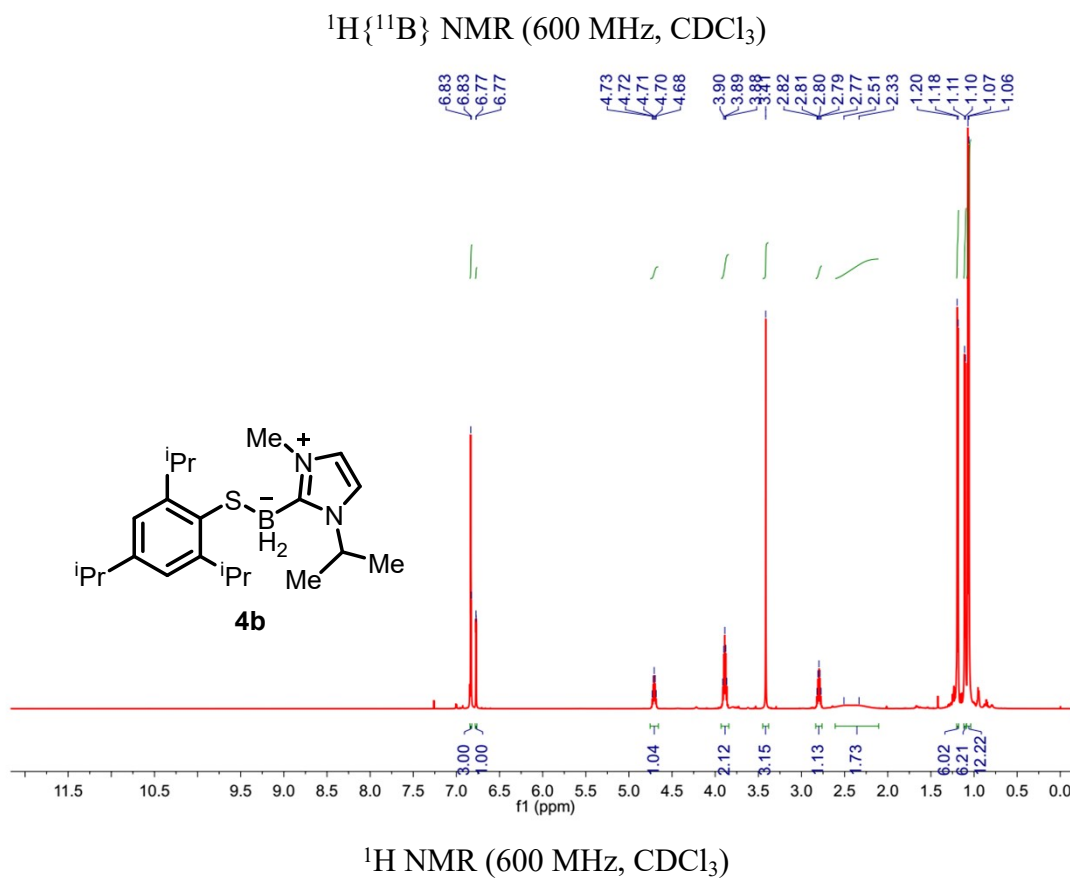

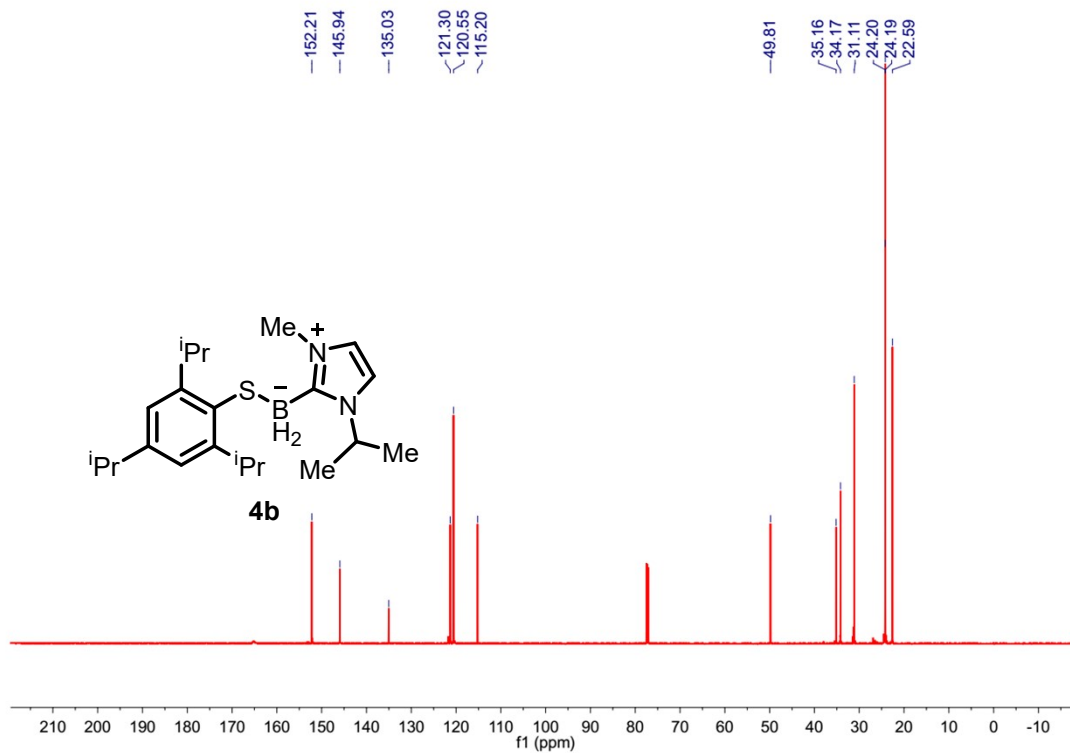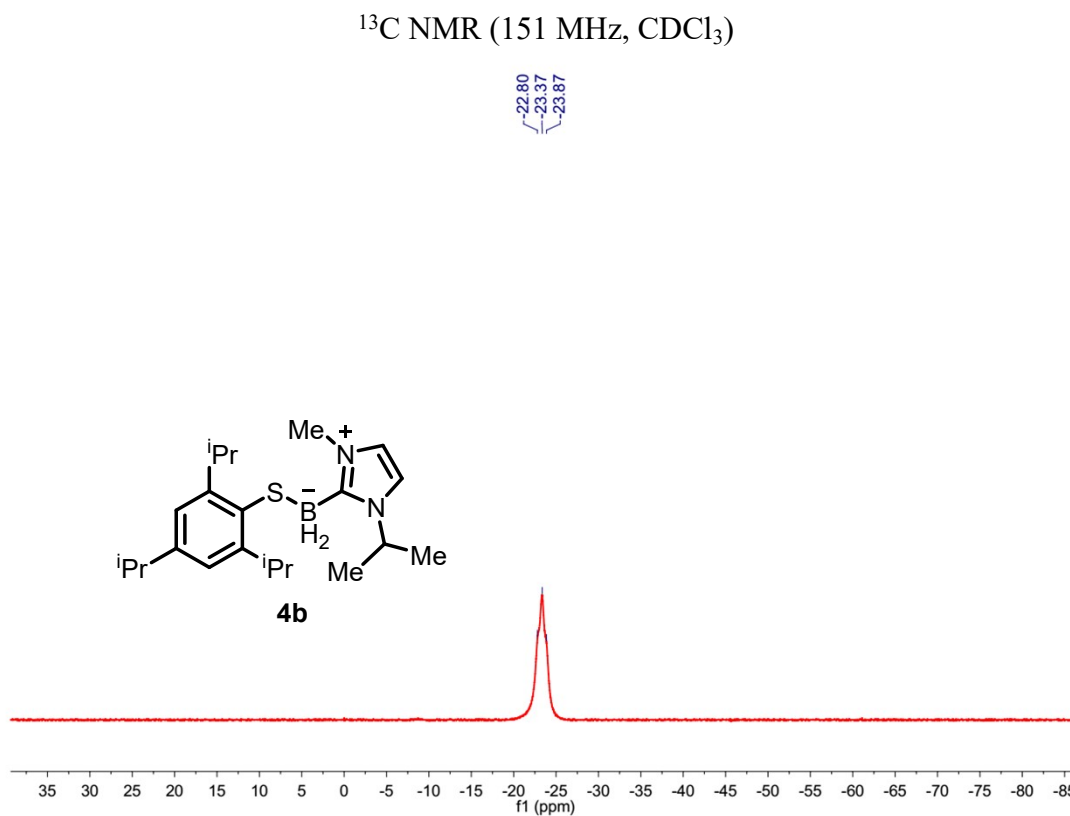

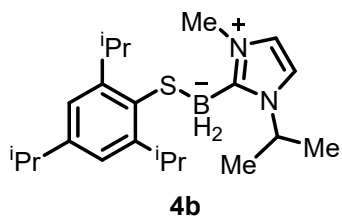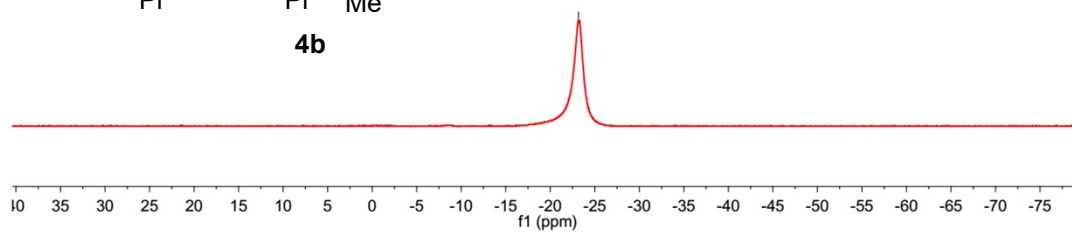

$^{11}\text{B}\{^1\text{H}\}$  NMR (193 MHz,  $\text{CDCl}_3$ )

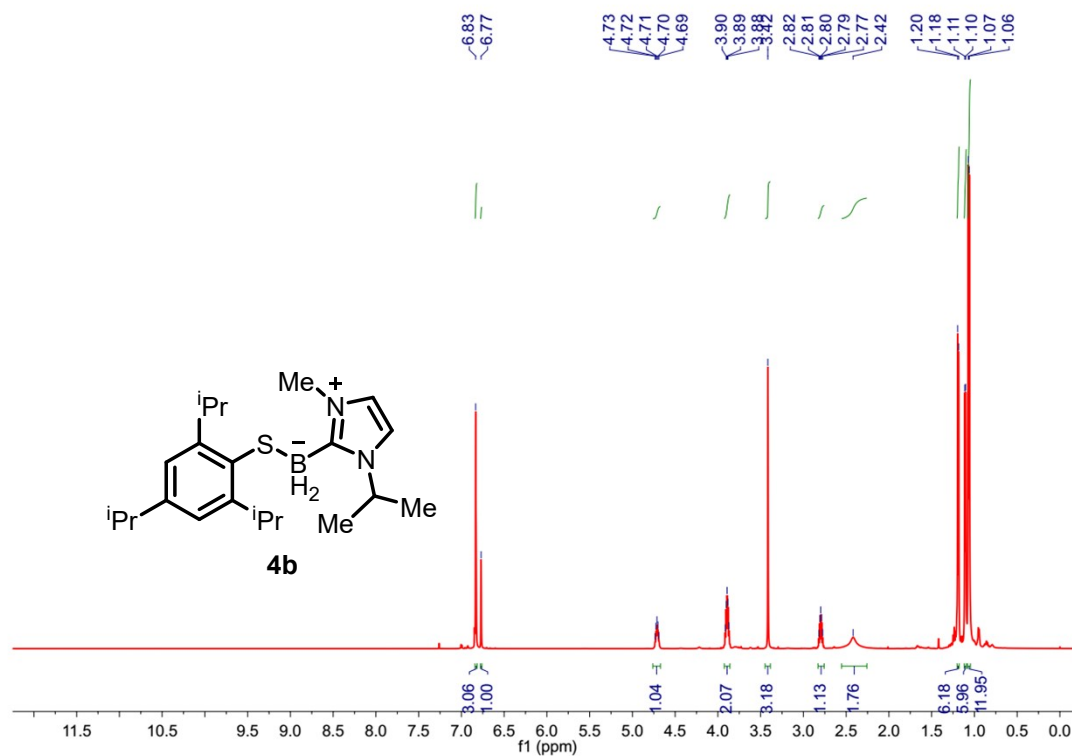

$^1\text{H}\{^{11}\text{B}\}$  NMR (600 MHz,  $\text{CDCl}_3$ )

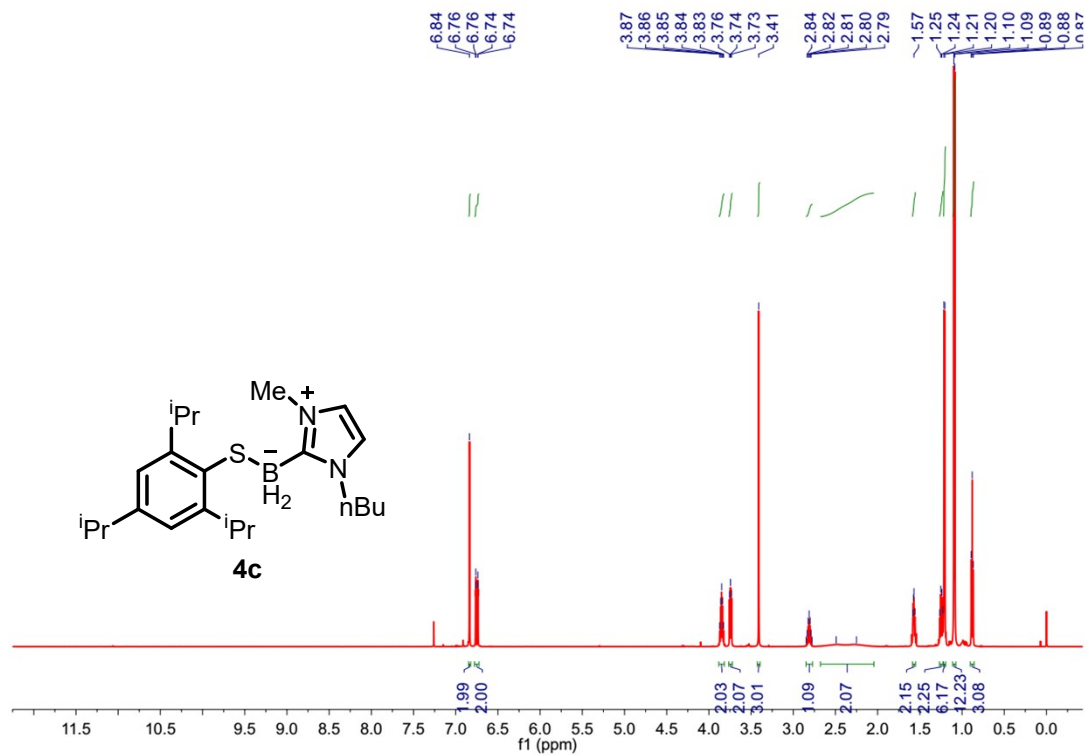

$^1\text{H}$  NMR (600 MHz,  $\text{CDCl}_3$ )

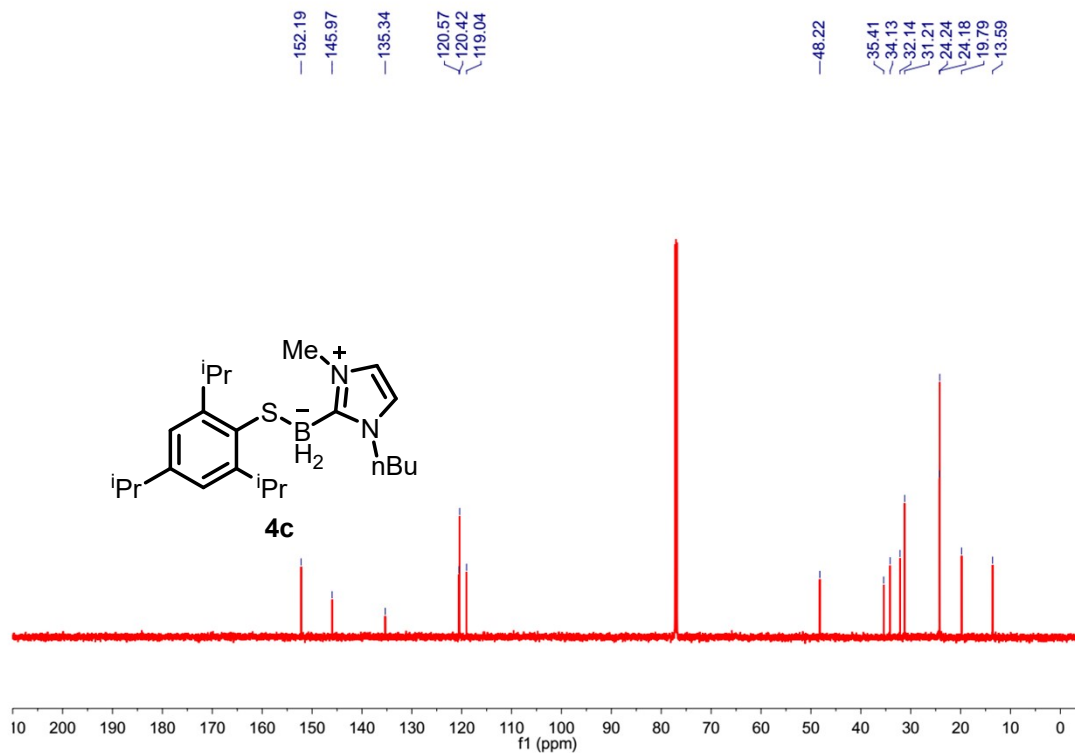

$^{13}\text{C}$  NMR (151 MHz,  $\text{CDCl}_3$ )

22.64  
23.14  
23.74

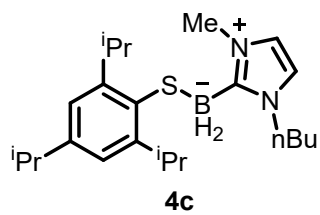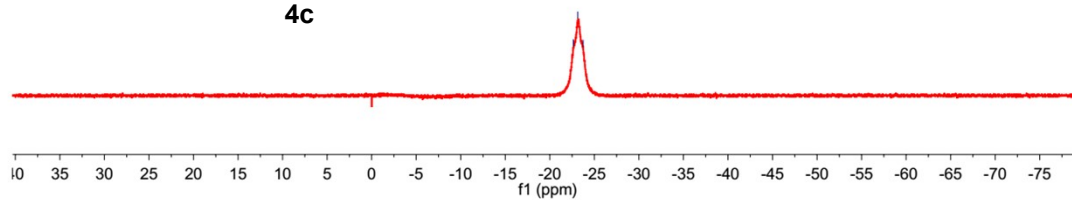

$^{11}\text{B}$  NMR (193 MHz,  $\text{CDCl}_3$ )

23.06

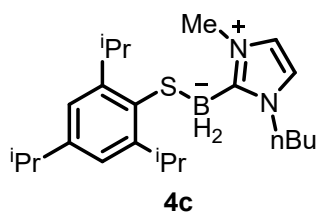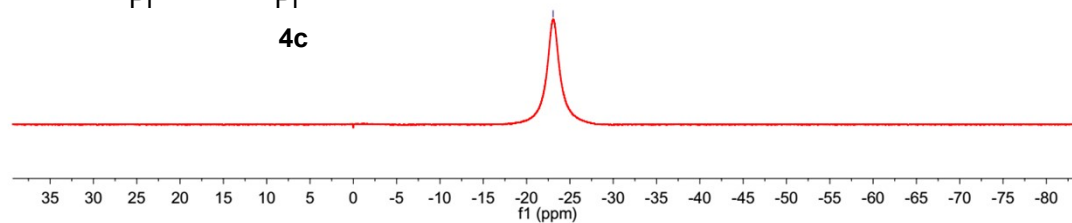

$^{11}\text{B}\{^1\text{H}\}$  NMR (193 MHz,  $\text{CDCl}_3$ )

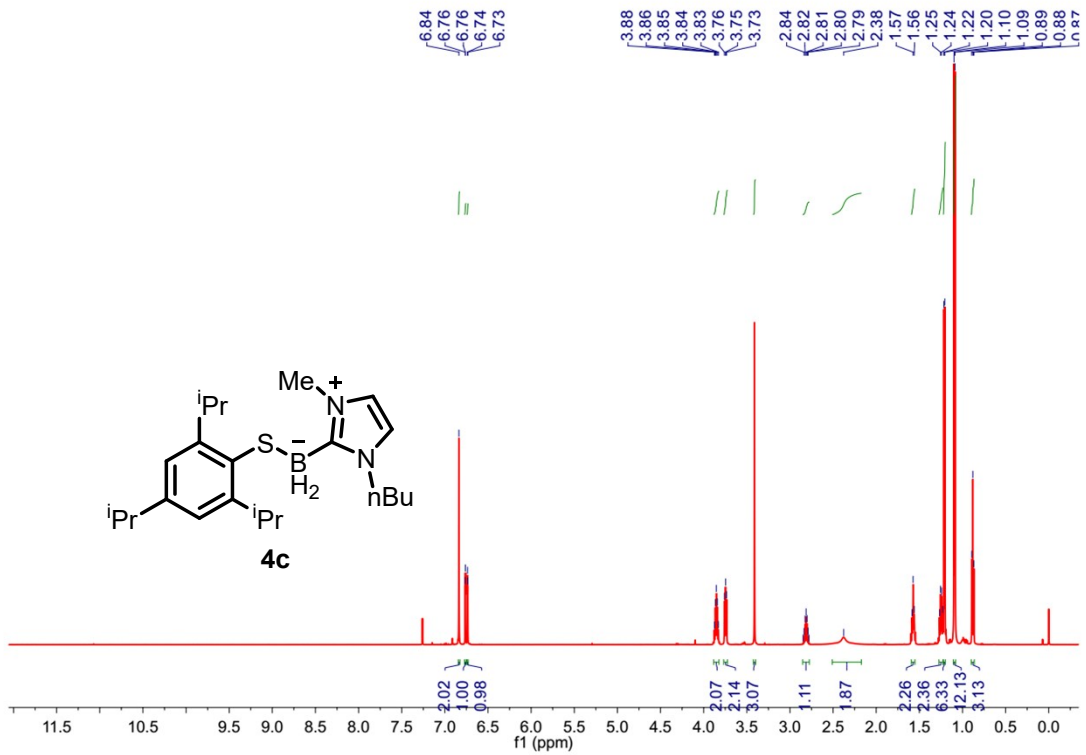

$^1\text{H}\{^{11}\text{B}\}$  NMR (600 MHz,  $\text{CDCl}_3$ )

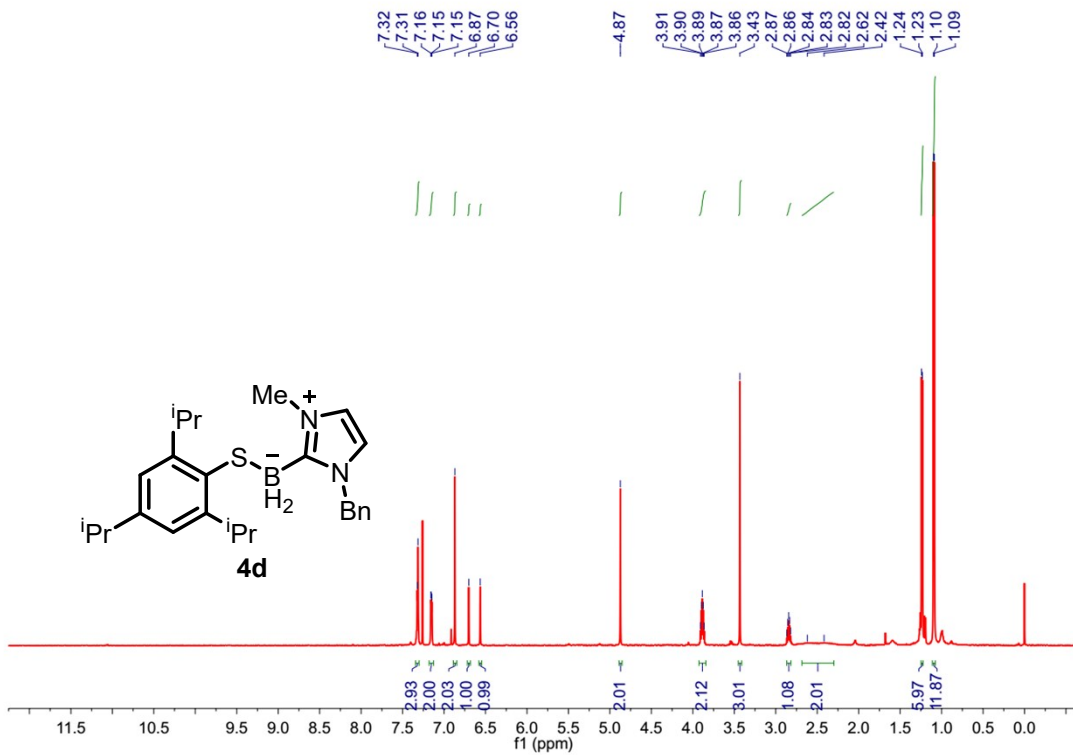

$^1\text{H}$  NMR (600 MHz,  $\text{CDCl}_3$ )



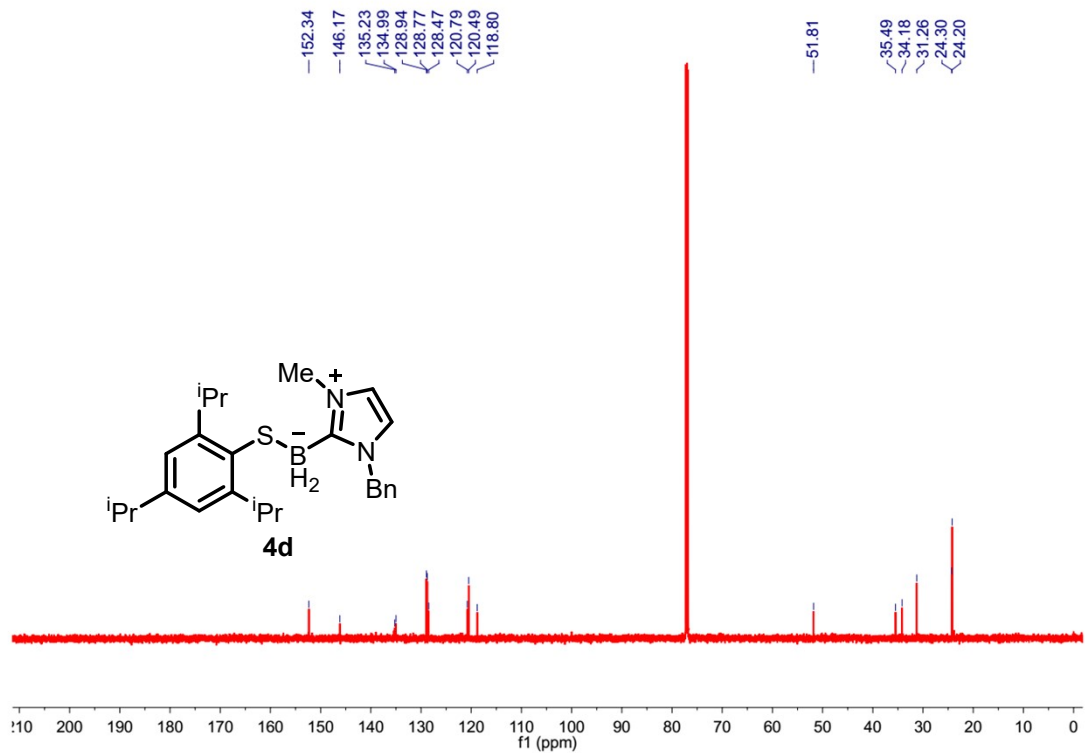

<sup>13</sup>C NMR (151 MHz, CDCl<sub>3</sub>)

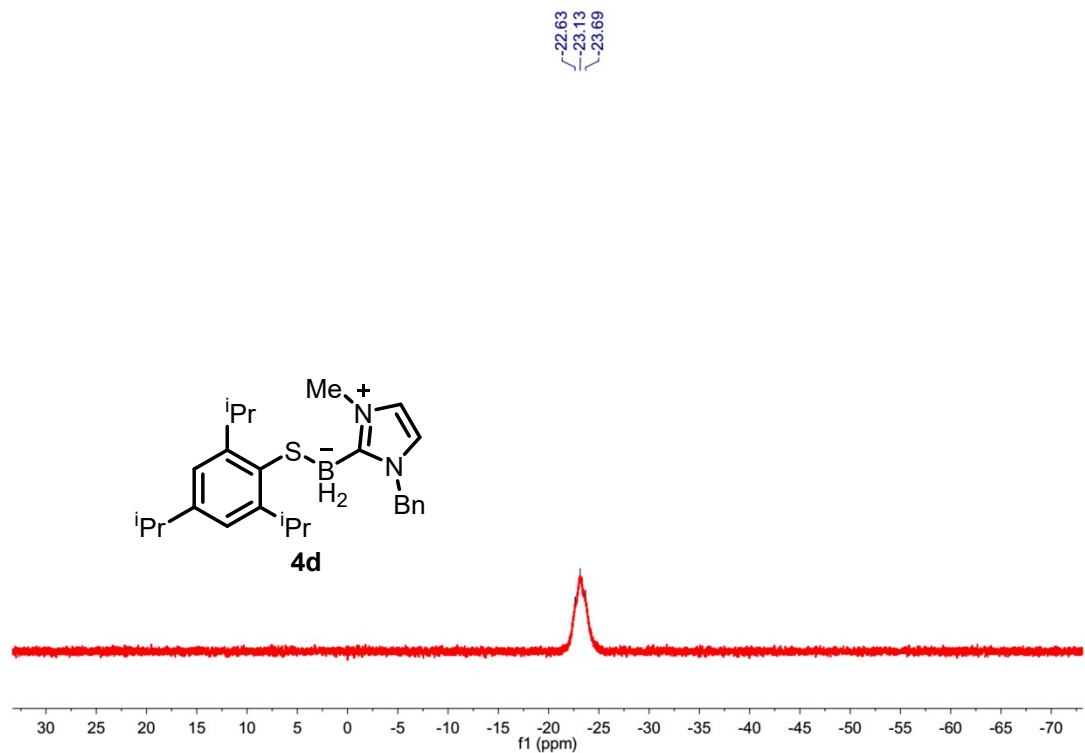

<sup>11</sup>B NMR (193 MHz, CDCl<sub>3</sub>)

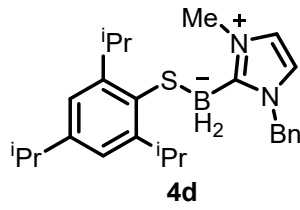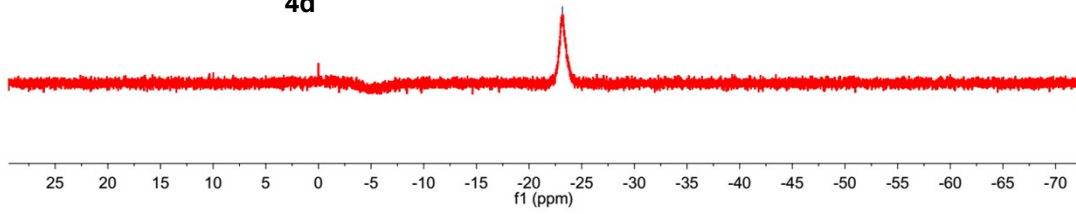

$^{11}\text{B}\{^1\text{H}\}$  NMR (193 MHz,  $\text{CDCl}_3$ )

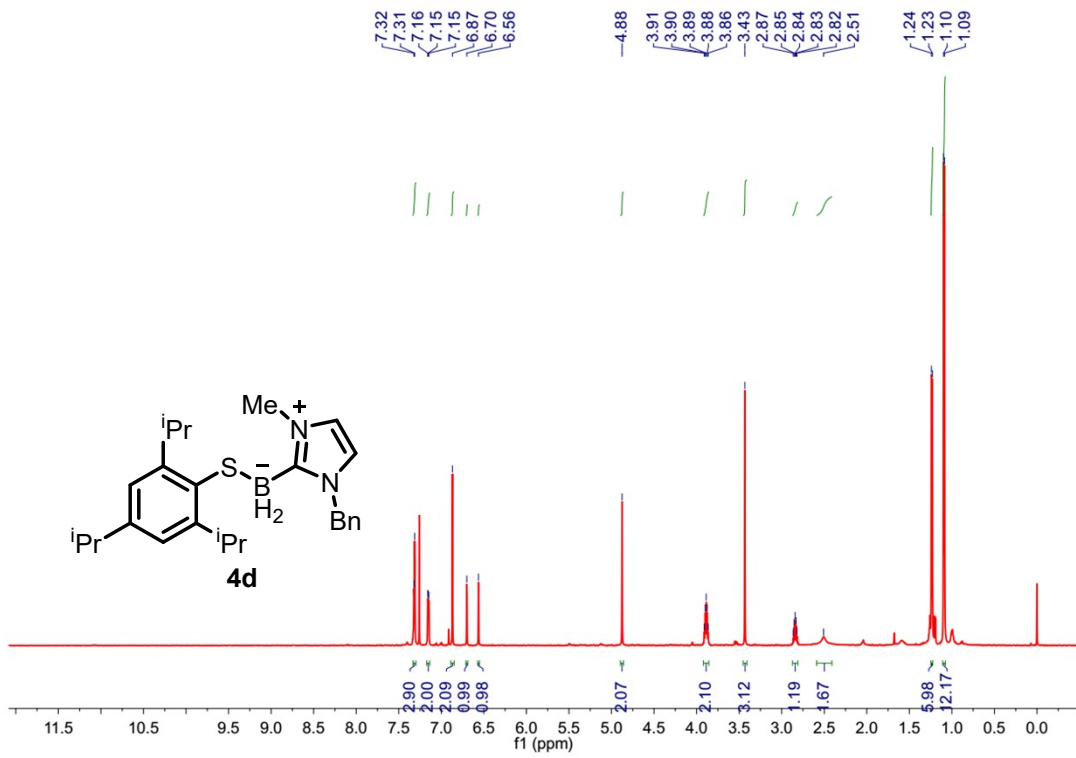

$^1\text{H}\{^{11}\text{B}\}$  NMR (600 MHz,  $\text{CDCl}_3$ )

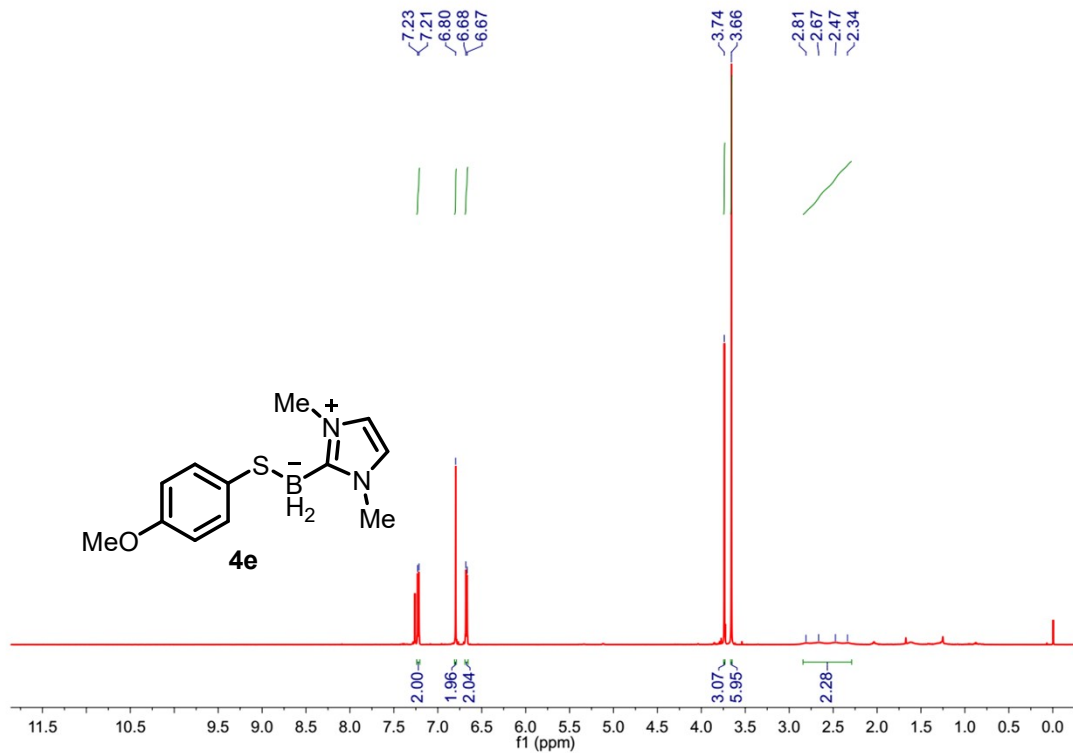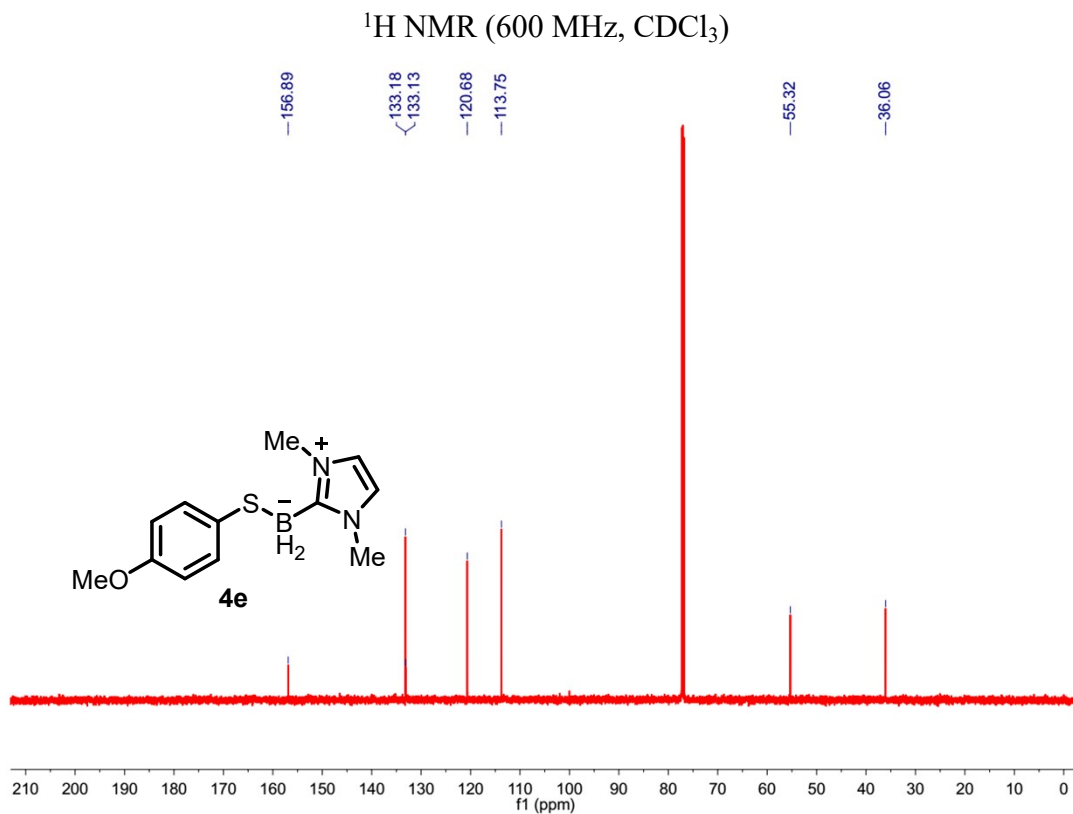

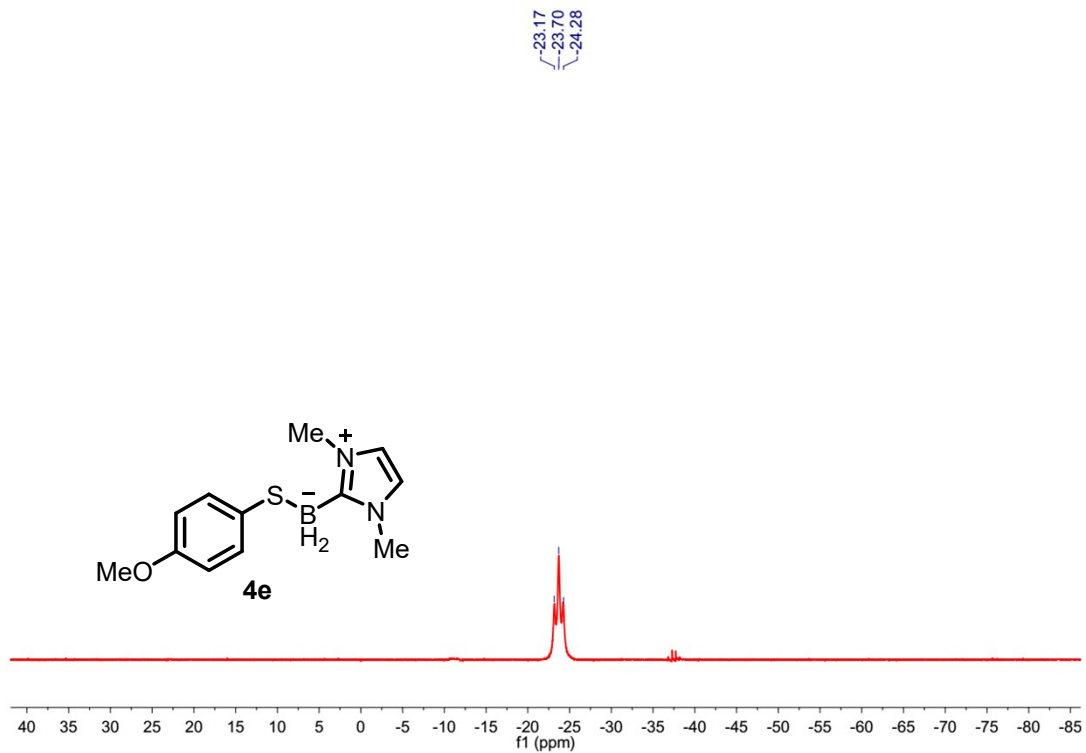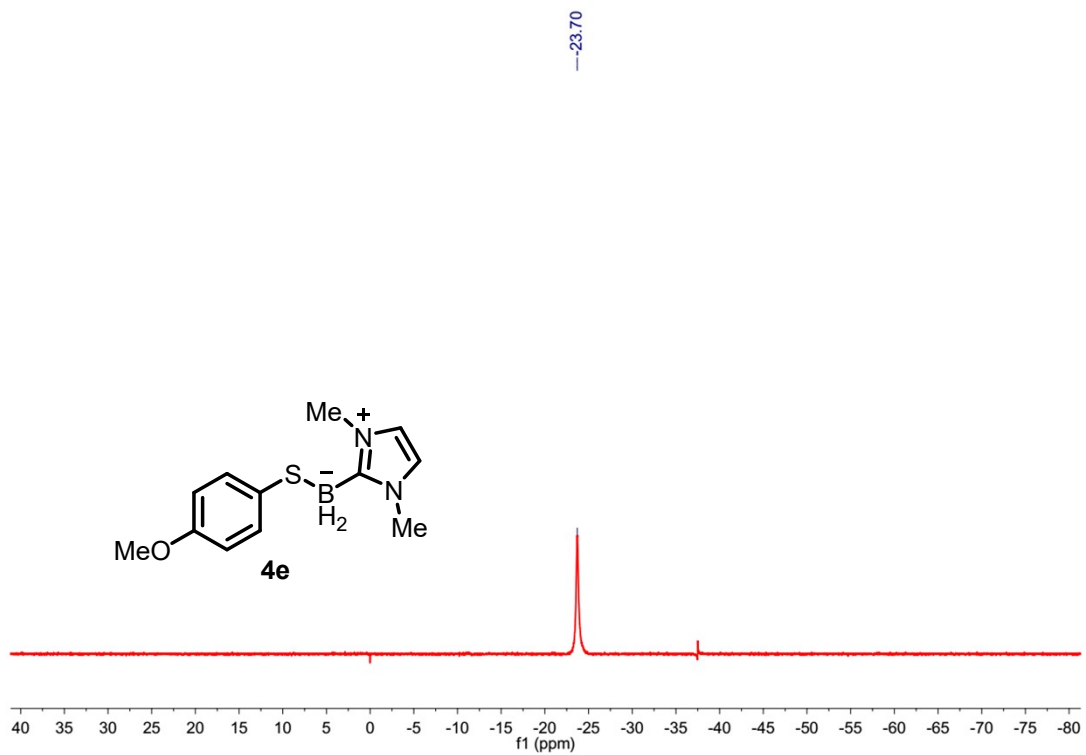

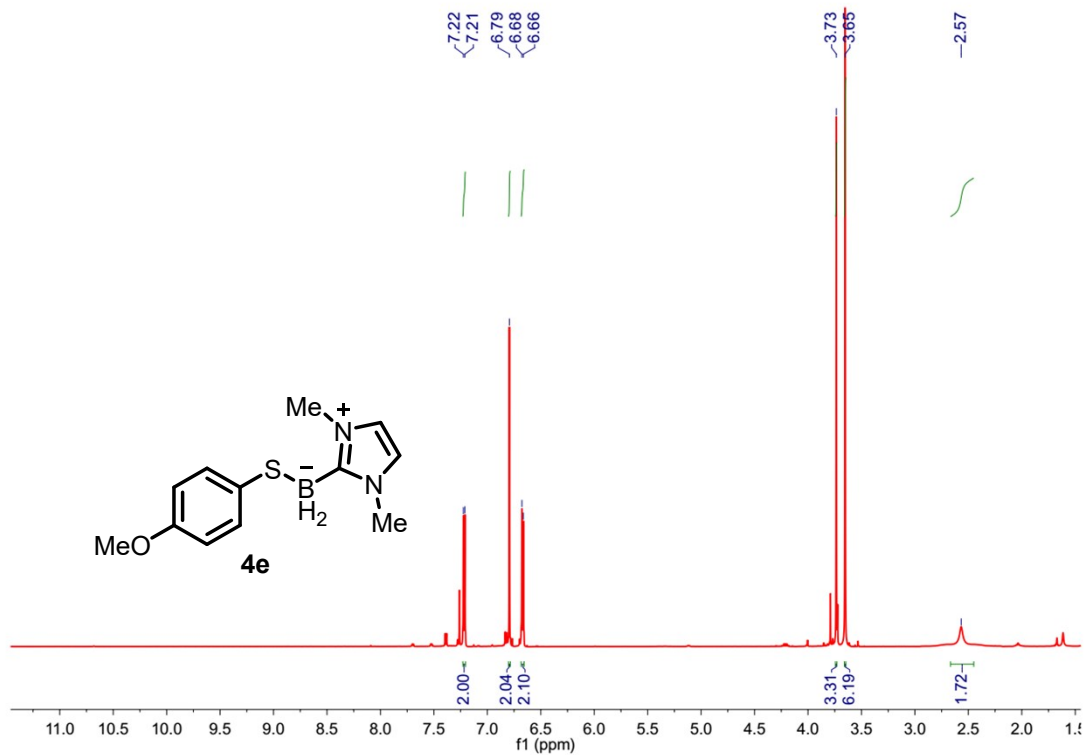

$^1\text{H}\{^{11}\text{B}\}$  NMR (600 MHz,  $\text{CDCl}_3$ )

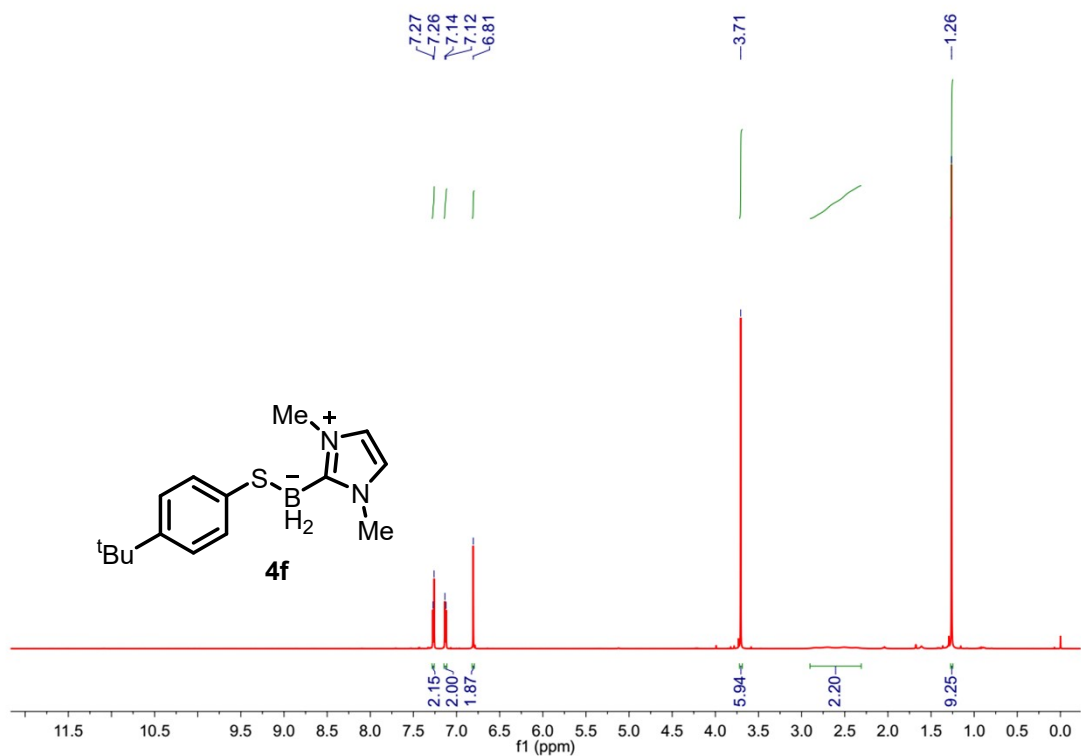

$^1\text{H}$  NMR (600 MHz,  $\text{CDCl}_3$ )

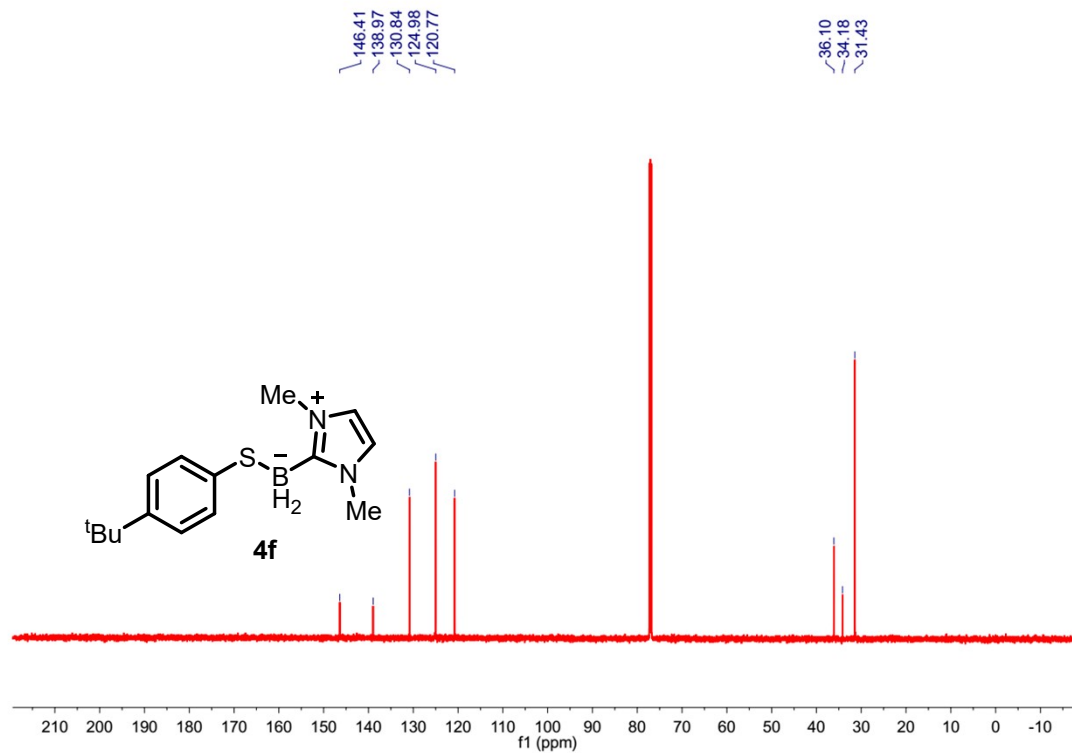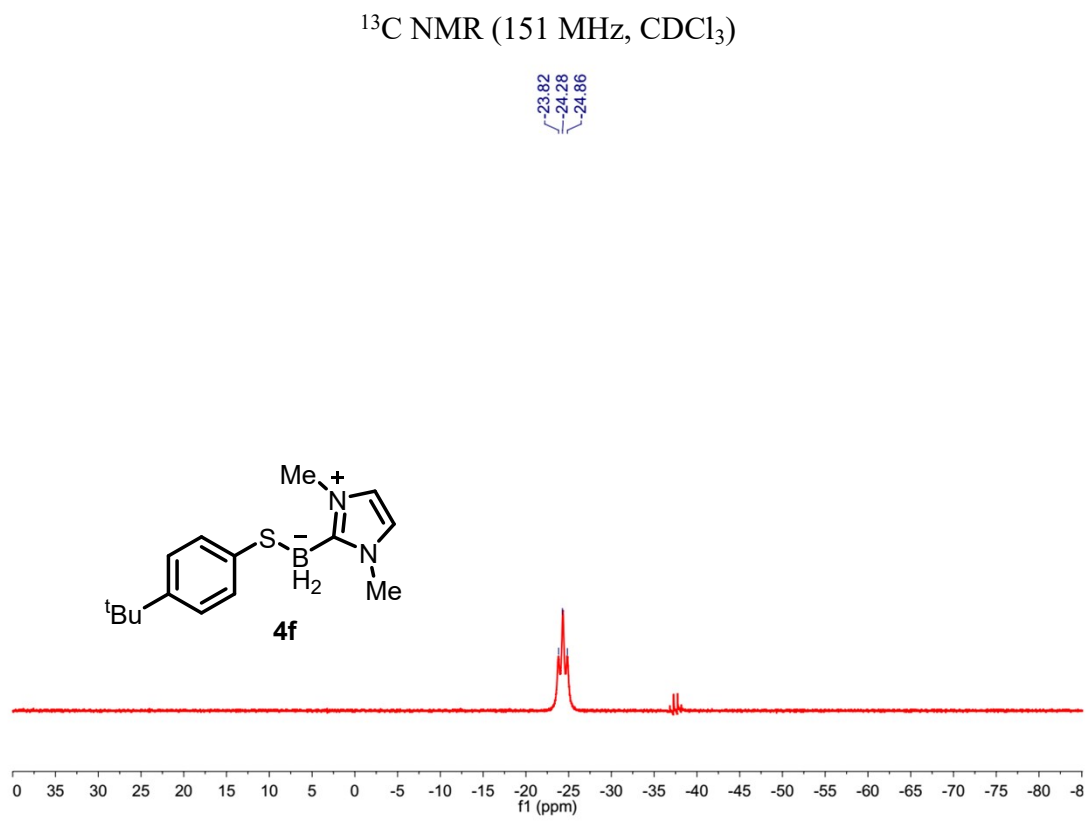

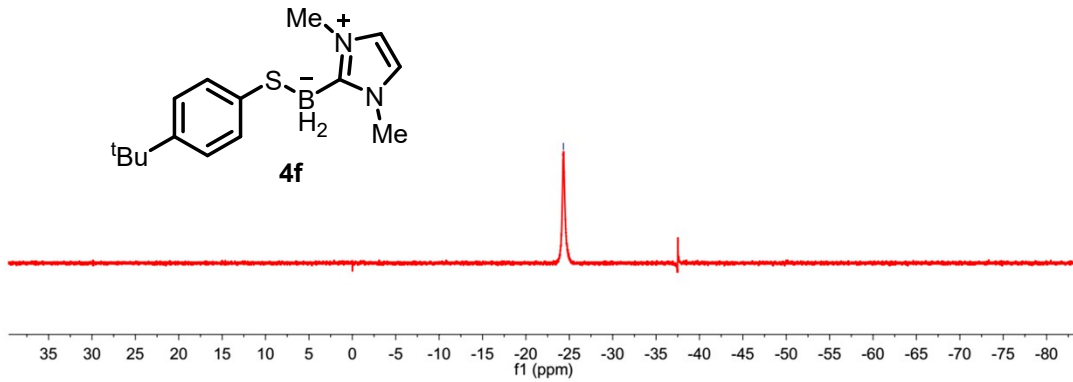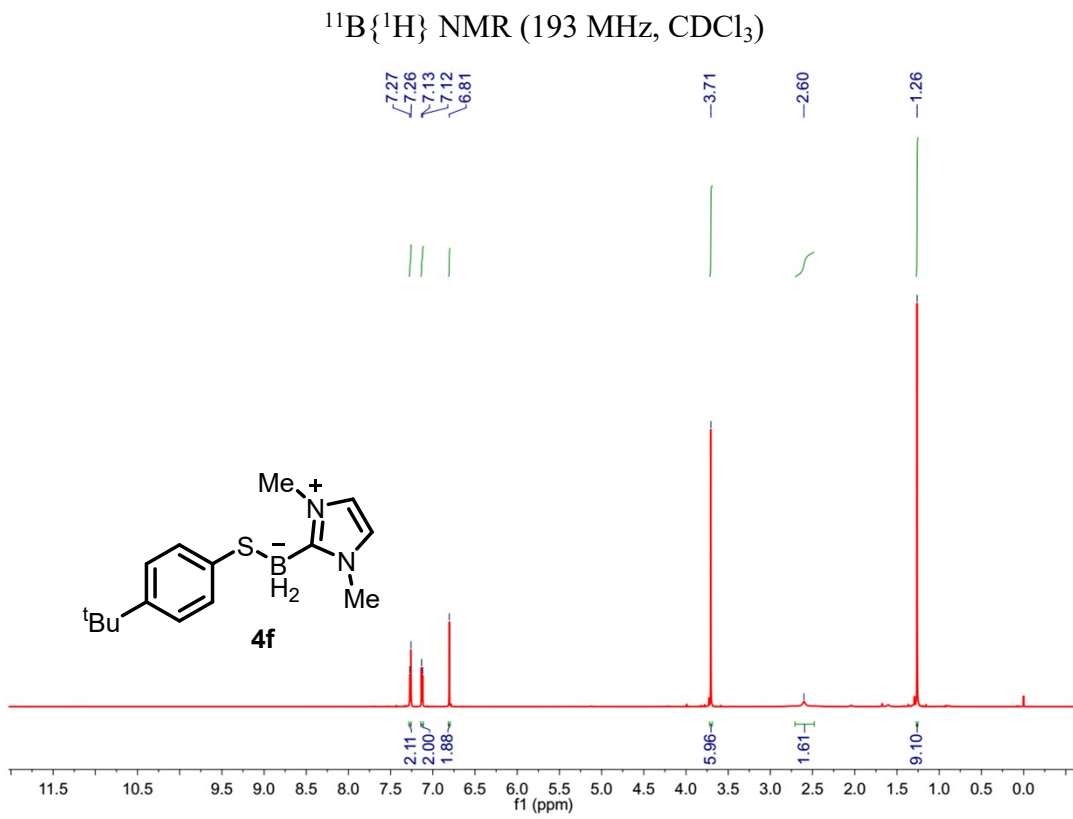

$^1\text{H}\{^{11}\text{B}\}$  NMR (600 MHz,  $\text{CDCl}_3$ )

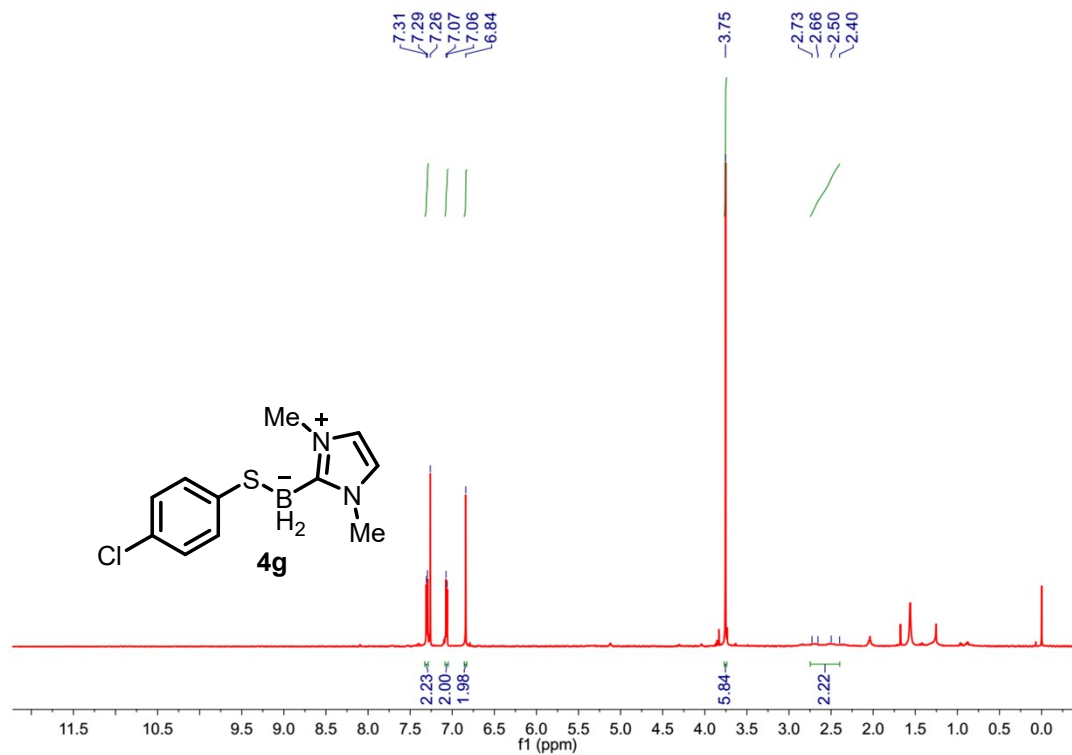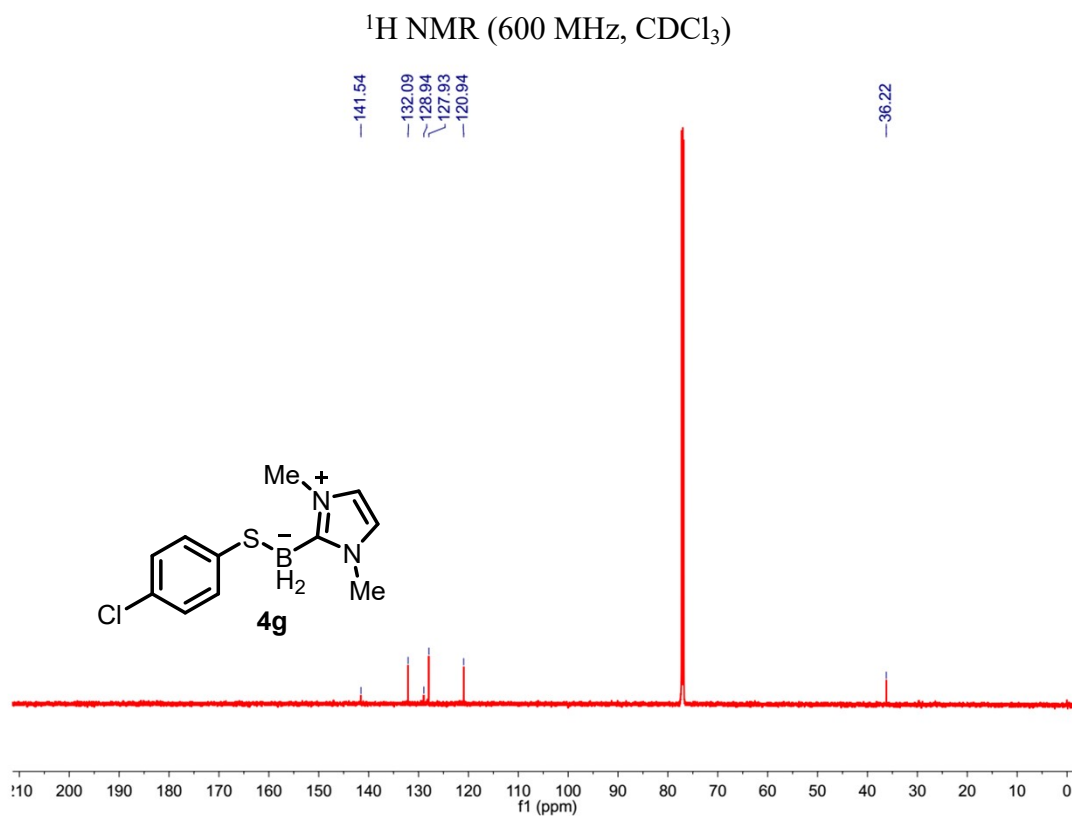



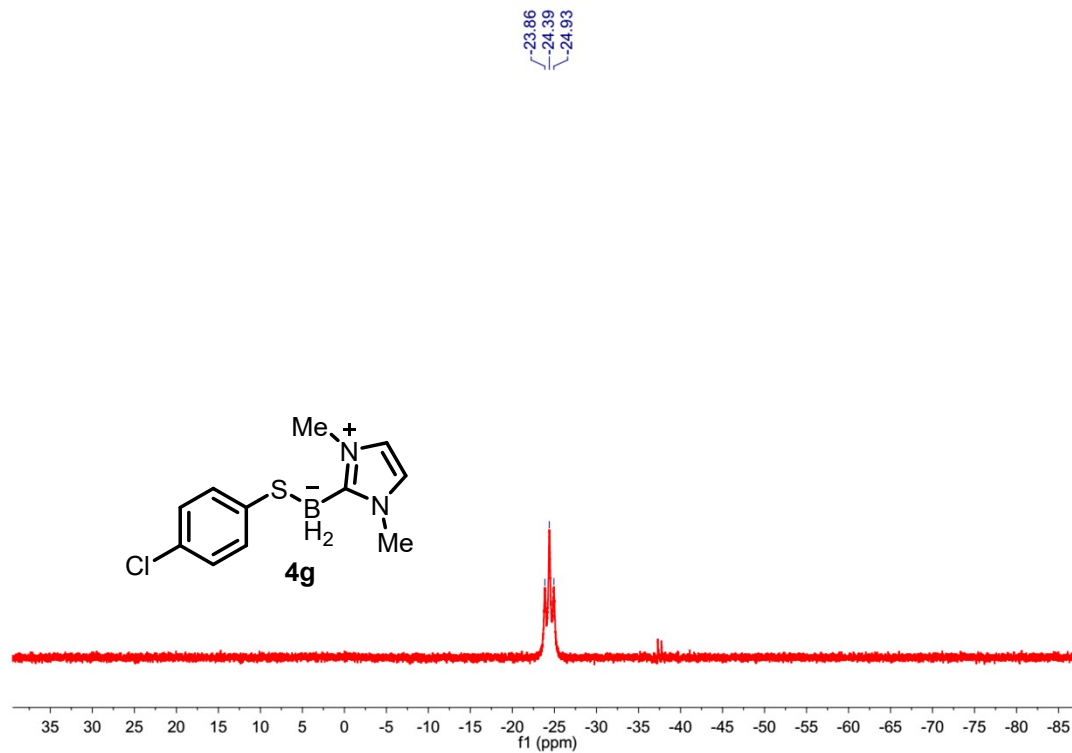

$^{11}\text{B}$  NMR (193 MHz,  $\text{CDCl}_3$ )

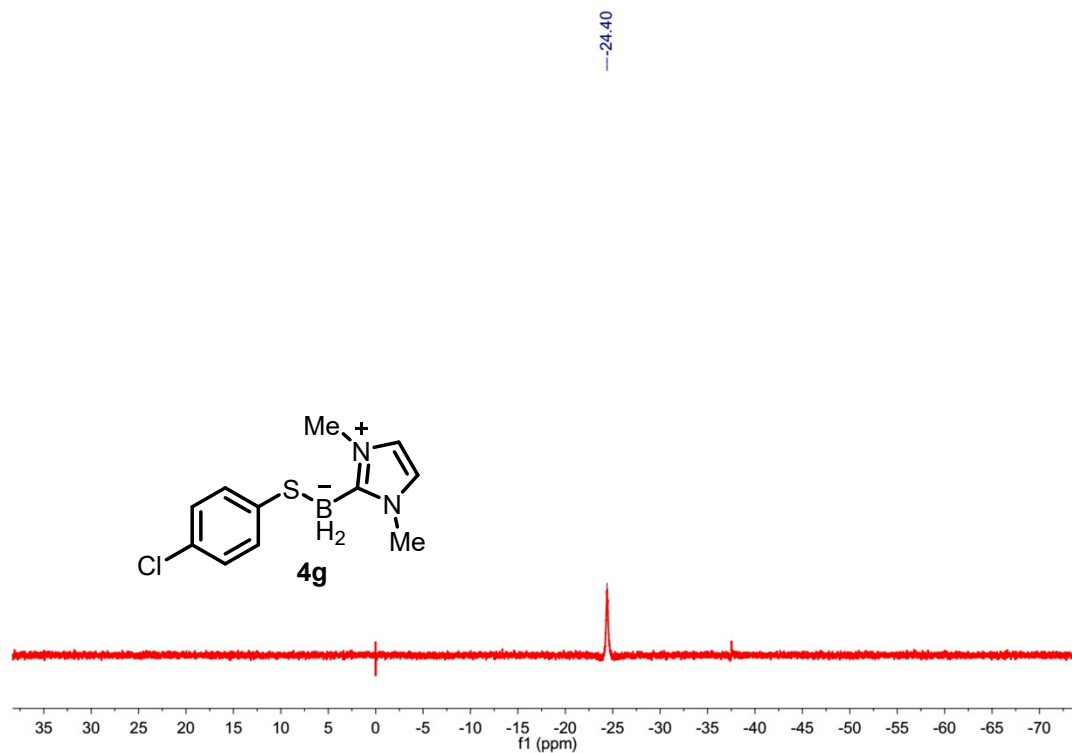

$^{11}\text{B}\{^1\text{H}\}$  NMR (193 MHz,  $\text{CDCl}_3$ )

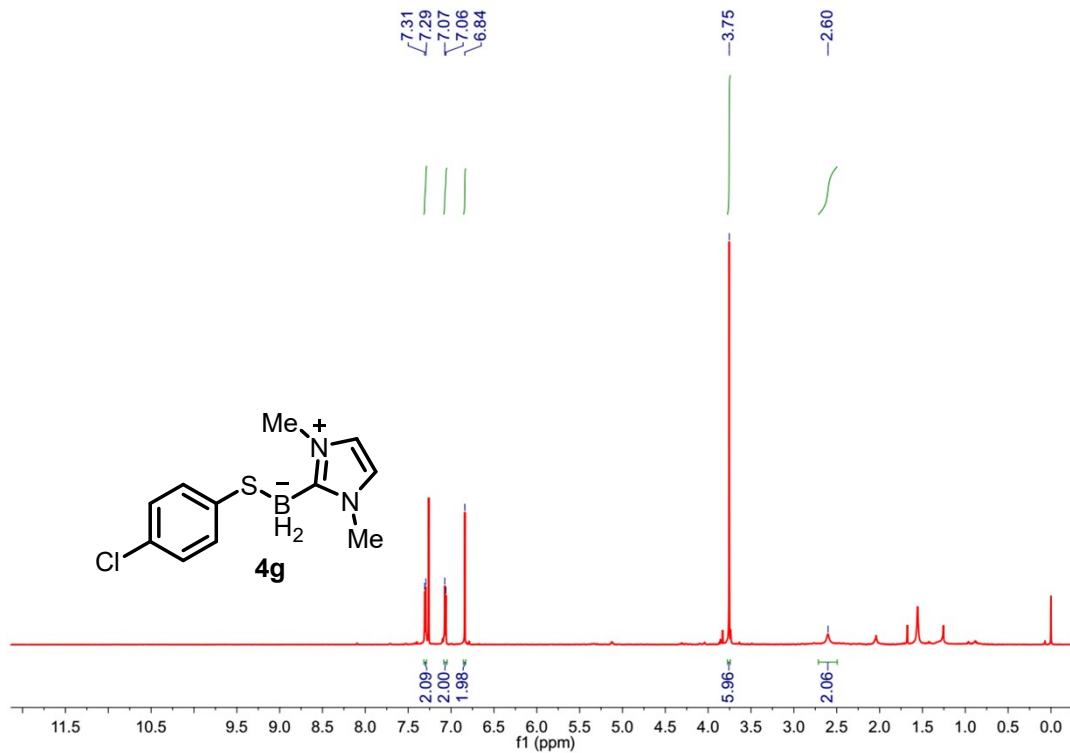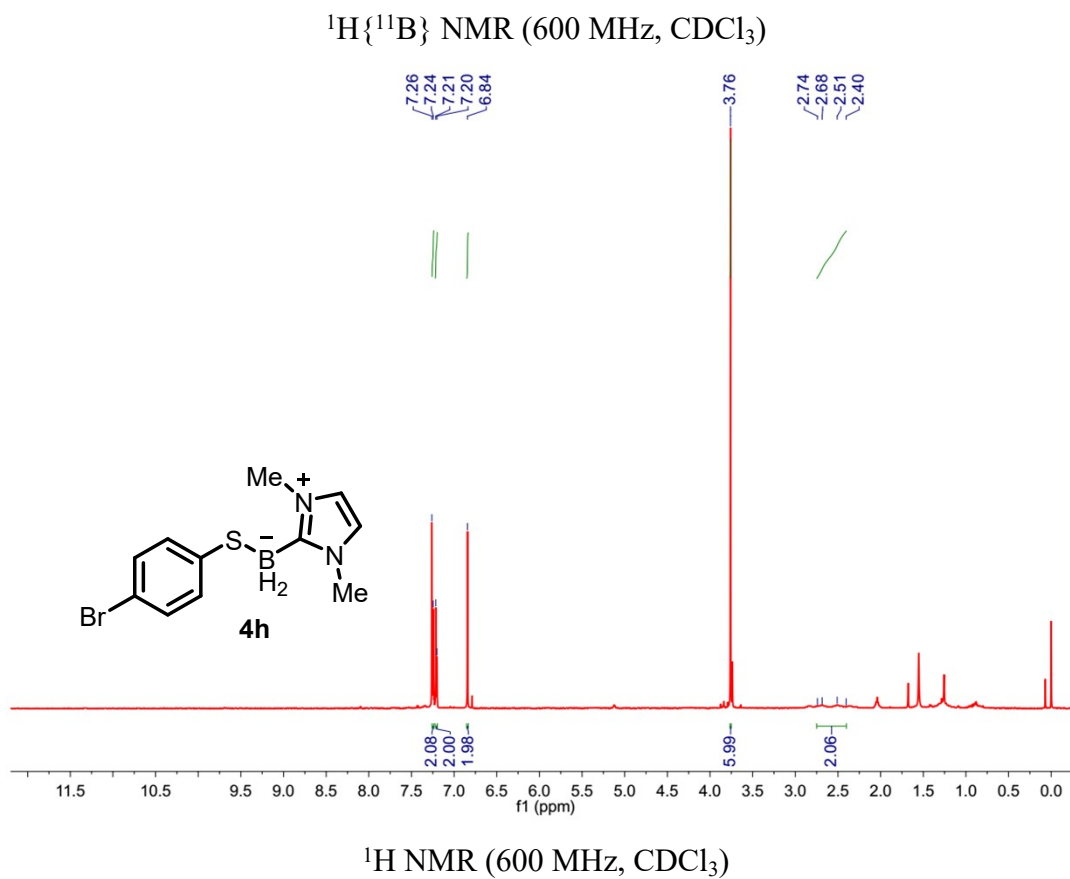

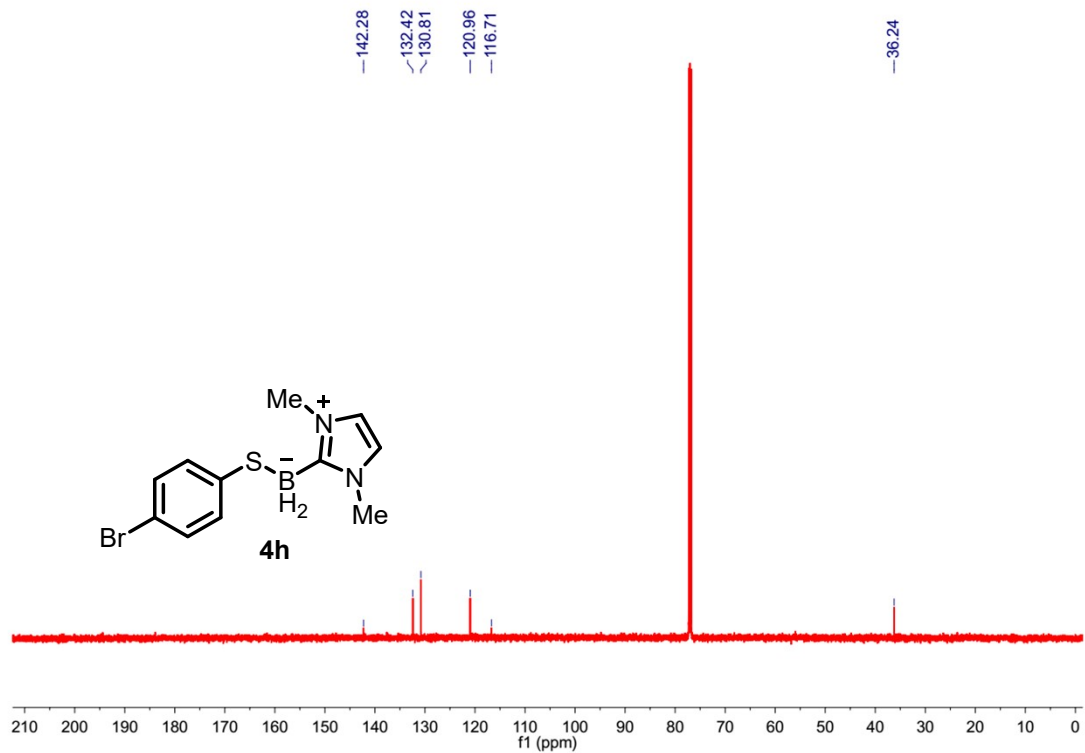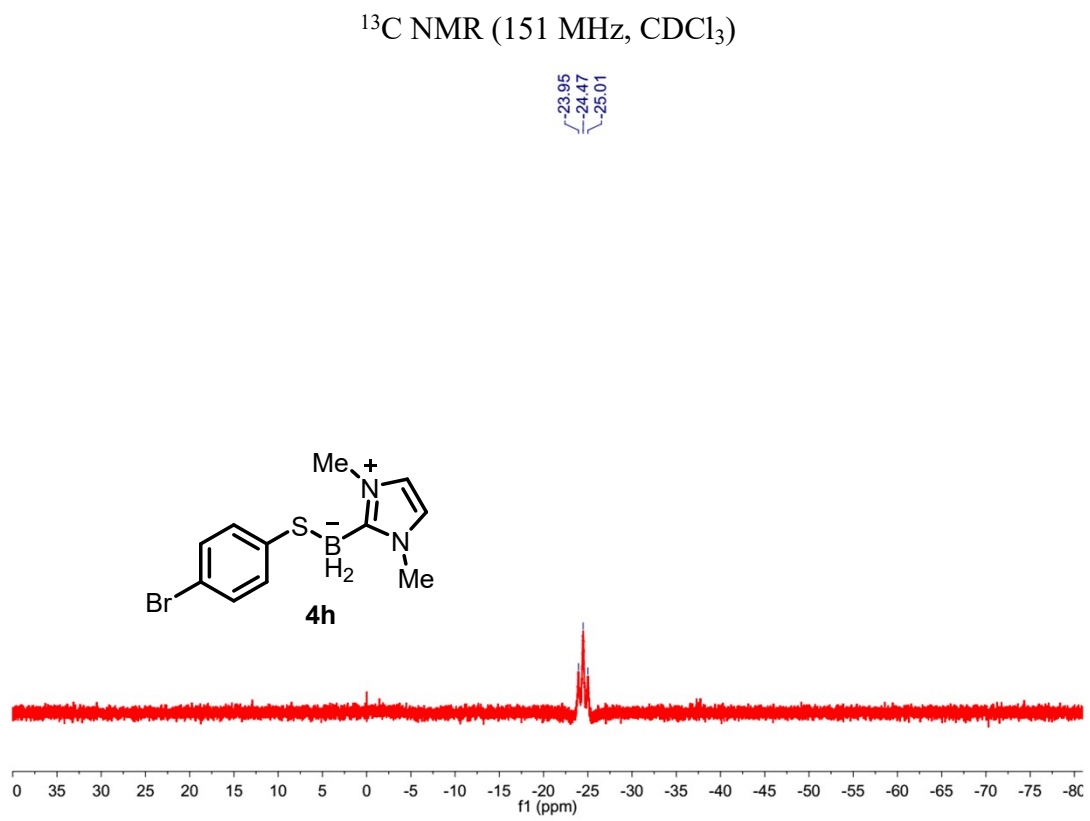

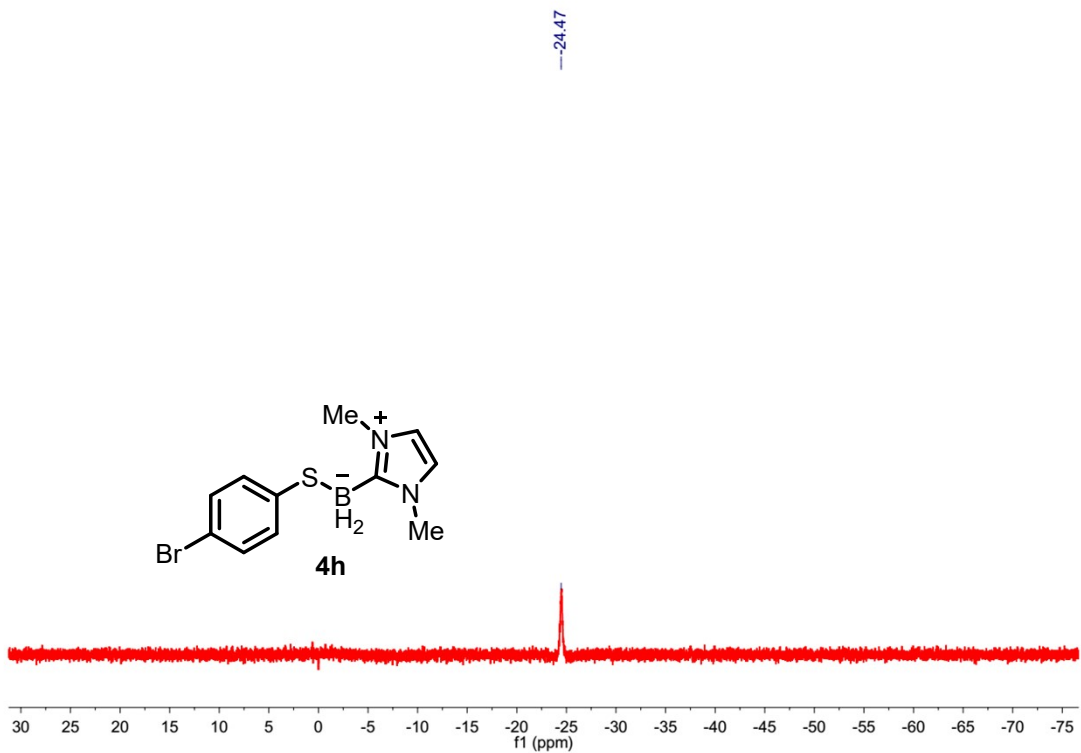

$^{11}\text{B}\{^1\text{H}\}$  NMR (193 MHz,  $\text{CDCl}_3$ )

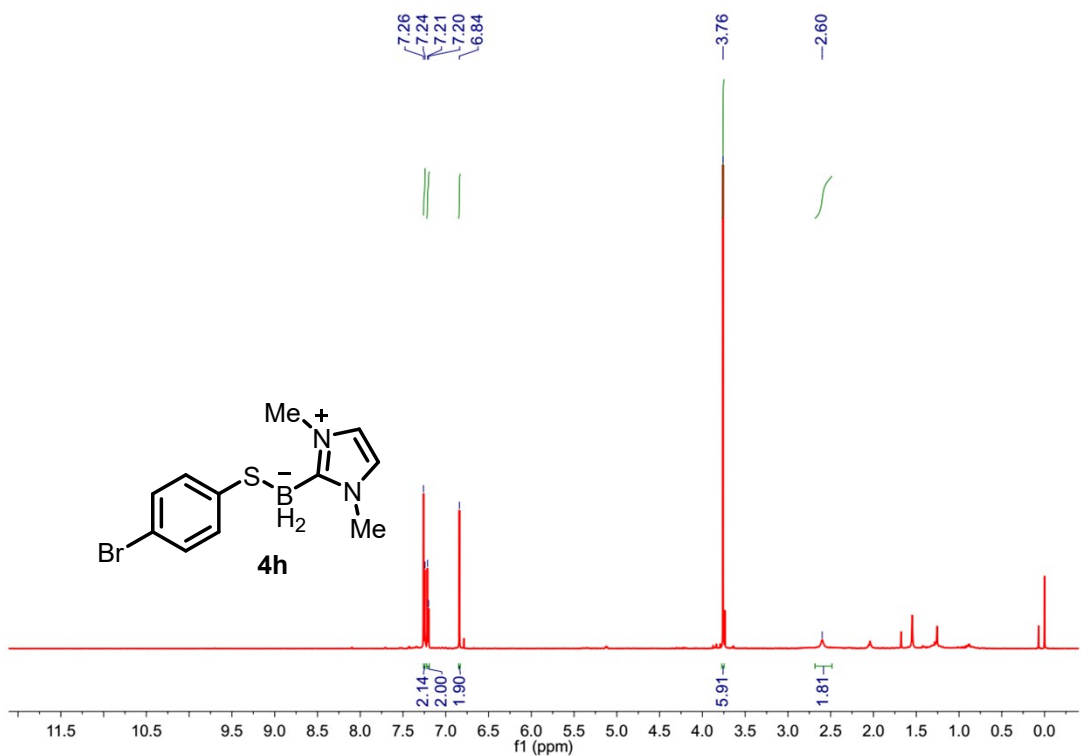

$^1\text{H}\{^{11}\text{B}\}$  NMR (600 MHz,  $\text{CDCl}_3$ )
